# Supplementary material for: Analysis of Failure Characteristics and Strength Criterion of Coal‐Rock Combined Body with Different Height Ratios
Source: Hindawi journal article supplement (doi:10.1155/2020/8842206), 2020-01-01
Supplement: f1 [file 8842206.f1.xls]

## Sheet: Sheet1
confining pressure 5MPa	Axial strain	Stress	Circle strain	Stress	Volume strain	Stress		Axial strain	Stress	Circle strain	Stress	Volume strain	Stress		Axial strain	Stress	Circle strain	Stress	Volume strain	Stress		Axial strain	Stress	Circle strain	Stress	Volume strain	Stress		confining pressure 10MPa	Axial strain	Stress	Circle strain	Stress	Volume strain	Stress		Axial strain	Stress	Circle strain	Stress	Volume strain	Stress		Axial strain	Stress	Circle strain	Stress	Volume strain	Stress
		RCB-1-3				RCB-1-3			RCB-1-2				RCB-1-2			RCB-1-1				RCB-1-1			RCB-2-1								RCB-1-3				RCB-1-3			RCB-1-2				RCB-1-2			RCB-1-1				RCB-1-1
	4.496e-05	0.72294	-4.81034e-07	0.72294	4.39979e-05	0.72294		1.81e-05	0.86894	-2.86224e-07	0.86894	1.75276e-05	0.86894		1.01844e-05	0.64439	1.38176e-06	0.64439	1.29479e-05	0.64439		-6.8e-07	0.62782	-4.44e-07	0.62782	-1.57e-06	0.62782			-1.63492e-05	0.64395	4.01e-06	0.64395	-1.06e-06	0.64395		1.25e-07	0.54118	4.53e-06	0.54118	9.18e-06	0.54118		7.72e-06	0.52091	-5.23e-07	0.52091	6.67e-06	0.52091
	5.296e-05	0.71146	-3.15289e-07	0.71146	5.23294e-05	0.71146		2.81e-05	0.88458	-2.17857e-07	0.88458	2.76643e-05	0.88458		2.69949e-05	0.72447	1.03443e-06	0.72447	2.90638e-05	0.72447		-2.28e-06	0.66754	-6.6e-08	0.66754	-2.41e-06	0.66754			6.10003e-06	0.64399	3.97e-06	0.64399	8.53e-06	0.64399		8.25e-06	0.56554	4.39e-06	0.56554	1.7e-05	0.56554		1.62e-05	0.56373	-7e-07	0.56373	1.48e-05	0.56373
	5.904e-05	0.8341	-6.34928e-07	0.8341	5.77701e-05	0.8341		3.31e-05	0.8548	-1.68878e-08	0.8548	3.30662e-05	0.8548		3.05594e-05	0.73306	6.89094e-07	0.73306	3.19376e-05	0.73306		2.98e-05	0.72861	-2.36e-07	0.72861	2.93e-05	0.72861			-1.0469e-05	0.76711	2.09e-06	0.76711	-1.39e-06	0.76711		1.2155e-05	0.62193	4.39e-06	0.62193	2.09e-05	0.62193		1.51e-05	0.61862	-5.65e-07	0.61862	1.4e-05	0.61862
	8.416e-05	0.86251	-6.6911e-07	0.86251	8.28218e-05	0.86251		3.69e-05	0.90482	-2.56633e-07	0.90482	3.63867e-05	0.90482		4.07376e-05	0.79853	7.29808e-07	0.79853	4.21972e-05	0.79853		3.25e-05	0.7911	-9.26e-08	0.7911	3.23e-05	0.7911			-2.15699e-05	0.7723	1.57e-06	0.7723	-6.94e-06	0.7723		3.275e-05	0.63045	4.22e-06	0.63045	4.12e-05	0.63045		4.06e-05	0.64368	-5.91e-07	0.64368	3.94e-05	0.64368
	8.528e-05	0.93956	-2.98844e-07	0.93956	8.46823e-05	0.93956		5.26e-05	0.9292	-3.11735e-07	0.9292	5.19765e-05	0.9292		5.81877e-05	0.82653	6.60156e-07	0.82653	5.9508e-05	0.82653		3.32e-05	0.82422	-3.36e-08	0.82422	3.31e-05	0.82422			3.14619e-05	0.82431	-7.24e-07	0.82431	1.24e-05	0.82431		3.685e-05	0.68461	3.5e-06	0.68461	4.38e-05	0.68461		3.76e-05	0.6347	-6.49e-07	0.6347	3.63e-05	0.6347
	0.00011344	0.9767	-9.56632e-07	0.9767	0.000111527	0.9767		5.33e-05	1.00934	-2.80612e-07	1.00934	5.27388e-05	1.00934		6.10443e-05	0.87539	4.32172e-07	0.87539	6.19086e-05	0.87539		4.85e-05	0.86193	-7.37e-07	0.86193	4.7e-05	0.86193			4.03921e-05	0.81293	-3.09e-07	0.81293	1.68e-05	0.81293		4.65e-05	0.70962	3.82e-06	0.70962	5.41e-05	0.70962		5.05e-05	0.70671	-1.09e-06	0.70671	4.83e-05	0.70671
	0.00013664	1.04895	-3.00393e-07	1.04895	0.000136039	1.04895		7.09e-05	0.98396	-8.97959e-08	0.98396	7.07204e-05	0.98396		7.47063e-05	0.90864	1.34285e-06	0.90864	7.7392e-05	0.90864		6.53e-05	0.89509	-3.35e-07	0.89509	6.46e-05	0.89509			7.41895e-05	0.89508	-1.85e-06	0.89508	2.9e-05	0.89508		6.375e-05	0.75457	3.59e-06	0.75457	7.09e-05	0.75457		6.02e-05	0.73827	-6.74e-07	0.73827	5.89e-05	0.73827
	0.00013504	1.06588	-4.78968e-07	1.06588	0.000134082	1.06588		8.54e-05	1.03858	-1.16327e-07	1.03858	8.51674e-05	1.03858		9.69381e-05	0.95051	1.1405e-07	0.95051	9.71662e-05	0.95051		8.1e-05	0.92987	-2.67e-07	0.92987	8.05e-05	0.92987			8.06468e-05	0.98352	-3.94e-06	0.98352	2.87e-05	0.98352		6.88e-05	0.76475	2.84e-06	0.76475	7.45e-05	0.76475		6.51e-05	0.77982	-5.39e-07	0.77982	6.4e-05	0.77982
	0.0001712	1.20784	-5.55825e-07	1.20784	0.000170088	1.20784		8.44e-05	1.07515	-4.7449e-07	1.07515	8.3451e-05	1.07515		0.000112625	0.96388	1.17699e-06	0.96388	0.000114979	0.96388		8.06e-05	0.96096	2.37e-08	0.96096	8.06e-05	0.96096			8.73788e-05	1.0546	-5.64e-06	1.0546	2.91e-05	1.0546		7.445e-05	0.80016	2.32e-06	0.80016	7.91e-05	0.80016		8.15e-05	0.80916	-5.2e-07	0.80916	8.05e-05	0.80916
	0.000176	1.19189	-1.97126e-07	1.19189	0.000175606	1.19189		0.000107	1.12391	-2.15306e-07	1.12391	0.000106569	1.12391		0.000120472	1.03142	9.60186e-07	1.03142	0.000122392	1.03142		8.5e-05	0.9983	4.47e-08	0.9983	8.51e-05	0.9983			7.08922e-05	1.04657	-5.92e-06	1.04657	2.16e-05	1.04657		8.865e-05	0.85747	1.89e-06	0.85747	9.24e-05	0.85747		9.29e-05	0.85789	-1.12e-06	0.85789	9.07e-05	0.85789
	0.0001824	1.23351	-9.29286e-08	1.23351	0.000182214	1.23351		0.00011	1.15962	1.28061e-08	1.15962	0.000110026	1.15962		0.000143932	1.10344	1.85851e-06	1.10344	0.000147649	1.10344		0.000101	1.03525	-2.54e-07	1.03525	0.0001	1.03525			0.0001073	1.11336	-7.5e-06	1.11336	3.48e-05	1.11336		9.48e-05	0.85921	2.12e-06	0.85921	9.9e-05	0.85921		9.44e-05	0.85063	-1.1e-06	0.85063	9.22e-05	0.85063
	0.0001952	1.24297	-4.2878e-07	1.24297	0.000194342	1.24297		0.000114	1.18934	-2.36735e-07	1.18934	0.000113527	1.18934		0.000139069	1.12212	5.0225e-07	1.12212	0.000140073	1.12212		0.000115	1.09021	-2.86e-07	1.09021	0.000114	1.09021			0.000127221	1.17664	-8.85e-06	1.17664	4.14e-05	1.17664		0.000110213	0.91741	1.34e-06	0.91741	0.000113	0.91741		0.000107	0.9092	-1.06e-06	0.9092	0.000105	0.9092
	0.000216	1.3265	1.80885e-07	1.3265	0.000216362	1.3265		0.000122	1.21429	-4.62755e-07	1.21429	0.000121074	1.21429		0.000159653	1.16459	1.15025e-06	1.16459	0.000161954	1.16459		0.000114	1.10821	-6.88e-09	1.10821	0.000114	1.10821			0.000146226	1.24247	-1.07e-05	1.24247	4.68e-05	1.24247		0.00011153	0.95276	7.26e-07	0.95276	0.000113	0.95276		0.000123	0.9465	-1.02e-06	0.9465	0.000121	0.9465
	0.0002496	1.35911	-9.93292e-07	1.35911	0.000247613	1.35911		0.000135	1.23171	-2.60204e-07	1.23171	0.00013448	1.23171		0.00016036	1.19692	1.24797e-06	1.19692	0.000162856	1.19692		0.000135	1.1432	3.37e-08	1.1432	0.000135	1.1432			0.000153766	1.2829	-1.21e-05	1.2829	4.79e-05	1.2829		0.000128807	0.97667	5.18e-07	0.97667	0.00013	0.97667		0.00012	0.97114	-1.18e-06	0.97114	0.000118	0.97114
	0.0002448	1.45153	-1.32835e-08	1.45153	0.000244773	1.45153		0.000156	1.29015	-3.02551e-07	1.29015	0.000155395	1.29015		0.000171903	1.22127	9.30142e-07	1.22127	0.000173763	1.22127		0.000133	1.23308	-1.7e-07	1.23308	0.000133	1.23308			0.000176116	1.30471	-1.33e-05	1.30471	5.56e-05	1.30471		0.000131627	1.00419	4.74e-07	1.00419	0.000133	1.00419		0.000127	0.98534	-1.01e-06	0.98534	0.000125	0.98534
	0.000248	1.52506	-4.16492e-07	1.52506	0.000247167	1.52506		0.000153	1.33289	-4.15816e-07	1.33289	0.000152168	1.33289		0.000183108	1.28733	2.44527e-06	1.28733	0.000187999	1.28733		0.000159	1.25388	-2.76e-07	1.25388	0.000158	1.25388			0.000180882	1.36178	-1.5e-05	1.36178	5.52e-05	1.36178		0.000145271	1.0265	-3.05e-07	1.0265	0.000145	1.0265		0.000147	1.04238	-1.49e-06	1.04238	0.000144	1.04238
	0.0002848	1.48645	-1.41774e-07	1.48645	0.000284516	1.48645		0.000155	1.41396	-6.22449e-08	1.41396	0.000154876	1.41396		0.000207224	1.34095	1.91571e-06	1.34095	0.000211055	1.34095		0.000161	1.27125	-2.75e-07	1.27125	0.00016	1.27125			0.000197705	1.45046	-1.55e-05	1.45046	6.17e-05	1.45046		0.000147006	1.06749	-1.52e-06	1.06749	0.000144	1.06749		0.00015	1.04304	-1.22e-06	1.04304	0.000148	1.04304
	0.0002912	1.61145	-6.80411e-08	1.61145	0.000291064	1.61145		0.000178	1.361	-3.56122e-07	1.361	0.000177288	1.361		0.000215342	1.35373	2.15694e-06	1.35373	0.000219656	1.35373		0.000173	1.31256	-3.32e-07	1.31256	0.000172	1.31256			0.000213387	1.46373	-1.83e-05	1.46373	6.43e-05	1.46373		0.000168641	1.09899	-1.98e-06	1.09899	0.000165	1.09899		0.000156	1.07398	-1.16e-06	1.07398	0.000154	1.07398
	0.0003216	1.6364	1.7376e-07	1.6364	0.000321948	1.6364		0.000182	1.44307	-2.81122e-07	1.44307	0.000181438	1.44307		0.000212825	1.41749	1.86379e-06	1.41749	0.000216553	1.41749		0.000177	1.39783	-1.63e-07	1.39783	0.000177	1.39783			0.000224253	1.50815	-1.91e-05	1.50815	6.77e-05	1.50815		0.000159719	1.13203	-3.17e-06	1.13203	0.000153	1.13203		0.000158	1.12752	-1.52e-06	1.12752	0.000155	1.12752
	0.000304	1.59352	-1.53547e-07	1.59352	0.000303693	1.59352		0.000201	1.45854	-3.19388e-07	1.45854	0.000200361	1.45854		0.000254988	1.43306	9.84672e-07	1.43306	0.000256957	1.43306		0.000189	1.41377	2.27e-08	1.41377	0.000189	1.41377			0.000238776	1.51153	-1.9e-05	1.51153	7.4e-05	1.51153		0.000184686	1.18822	-3.91e-06	1.18822	0.000177	1.18822		0.000173	1.17642	-1.22e-06	1.17642	0.000171	1.17642
	0.0003584	1.66994	-3.53085e-07	1.66994	0.000357694	1.66994		0.00019	1.53516	-6.53061e-07	1.53516	0.000188694	1.53516		0.000256806	1.49591	1.48128e-06	1.49591	0.000259769	1.49591		0.000189	1.44058	-8.39e-08	1.44058	0.000189	1.44058			0.000252997	1.5411	-2.02e-05	1.5411	7.84e-05	1.5411		0.000187203	1.21641	-4.14e-06	1.21641	0.000179	1.21641		0.000185	1.2331	-1.19e-06	1.2331	0.000183	1.2331
	0.0003264	1.70482	-3.58249e-07	1.70482	0.000325684	1.70482		0.000224	1.55256	-2.43367e-07	1.55256	0.000223513	1.55256		0.000255512	1.52287	1.11374e-06	1.52287	0.000257739	1.52287		0.000213	1.49282	-5.4e-07	1.49282	0.000212	1.49282			0.000266529	1.60073	-2.24e-05	1.60073	8.1e-05	1.60073		0.000199793	1.23107	-4.42e-06	1.23107	0.000191	1.23107		0.000186	1.23486	-1.62e-06	1.23486	0.000183	1.23486
	0.0003728	1.75536	-6.06633e-07	1.75536	0.000371587	1.75536		0.000204	1.54404	-5.35714e-07	1.54404	0.000202929	1.54404		0.000265075	1.55842	2.26272e-06	1.55842	0.0002696	1.55842		0.000221	1.56084	-2.89e-07	1.56084	0.00022	1.56084			0.000282666	1.64301	-2.36e-05	1.64301	8.61e-05	1.64301		0.000200145	1.28257	-5.58e-06	1.28257	0.000189	1.28257		0.000201	1.25128	-1.02e-06	1.25128	0.000199	1.25128
	0.0003872	1.81496	-3.25306e-07	1.81496	0.000386549	1.81496		0.000233	1.57965	-3.38776e-07	1.57965	0.000232322	1.57965		0.00028702	1.57539	1.05663e-06	1.57539	0.000289133	1.57539		0.000212	1.53761	-5.97e-08	1.53761	0.000212	1.53761			0.00029538	1.68276	-2.45e-05	1.68276	9.02e-05	1.68276		0.000220437	1.32522	-6.75e-06	1.32522	0.000207	1.32522		0.00022	1.29159	-1.26e-06	1.29159	0.000217	1.29159
	0.0004048	1.90341	-6.40918e-07	1.90341	0.000403518	1.90341		0.000242	1.59942	-2.5e-07	1.59942	0.0002415	1.59942		0.00030308	1.64964	3.00478e-06	1.64964	0.00030909	1.64964		0.000233	1.6031	-3.68e-08	1.6031	0.000233	1.6031			0.000285084	1.72451	-2.53e-05	1.72451	8.45e-05	1.72451		0.000232103	1.36199	-7.84e-06	1.36199	0.000216	1.36199		0.000216	1.32182	-1.18e-06	1.32182	0.000214	1.32182
	0.0003952	1.98434	-2.9399e-07	1.98434	0.000394612	1.98434		0.000253	1.65937	-3.32653e-07	1.65937	0.000252335	1.65937		0.00030894	1.66976	1.40038e-06	1.66976	0.000311741	1.66976		0.000241	1.64999	7.16e-08	1.64999	0.000241	1.64999			0.000322973	1.74535	-2.66e-05	1.74535	9.89e-05	1.74535		0.000244776	1.39144	-8.93e-06	1.39144	0.000227	1.39144		0.000232	1.34286	-1.49e-06	1.34286	0.000229	1.34286
	0.0004672	2.03609	-2.72098e-07	2.03609	0.000466656	2.03609		0.000247	1.68484	-3.38776e-07	1.68484	0.000246322	1.68484		0.00030639	1.74955	2.31237e-06	1.74955	0.000311015	1.74955		0.000243	1.70847	-1.44e-07	1.70847	0.000243	1.70847			0.000313732	1.82697	-2.81e-05	1.82697	9.27e-05	1.82697		0.000245286	1.41188	-9.7e-06	1.41188	0.000226	1.41188		0.000242	1.37313	-1.2e-06	1.37313	0.00024	1.37313
	0.0004304	2.08477	-8.23727e-07	2.08477	0.000428753	2.08477		0.000292	1.74473	-3.04592e-07	1.74473	0.000291391	1.74473		0.00034109	1.79829	2.53121e-06	1.79829	0.000346152	1.79829		0.000274	1.74023	2.17e-07	1.74023	0.000274	1.74023			0.000327643	1.84639	-2.9e-05	1.84639	9.73e-05	1.84639		0.00025167	1.44663	-1.06e-05	1.44663	0.00023	1.44663		0.000252	1.38903	-1.44e-06	1.38903	0.000249	1.38903
	0.0004736	2.10262	-4.92806e-07	2.10262	0.000472614	2.10262		0.000269	1.72592	-2.57143e-07	1.72592	0.000268486	1.72592		0.000341861	1.80144	2.72764e-06	1.80144	0.000347316	1.80144		0.000277	1.77189	-2.92e-08	1.77189	0.000277	1.77189			0.000358166	1.92141	-3.07e-05	1.92141	0.000108	1.92141		0.000265897	1.48077	-1.19e-05	1.48077	0.000242	1.48077		0.000255	1.46334	-9.6e-07	1.46334	0.000253	1.46334
	0.0004816	2.15448	-5.52101e-08	2.15448	0.00048149	2.15448		0.000296	1.78533	-1.91327e-07	1.78533	0.000295617	1.78533		0.000364988	1.86623	1.1179e-06	1.86623	0.000367224	1.86623		0.000278	1.78991	1.11e-07	1.78991	0.000278	1.78991			0.000379207	1.97166	-3.2e-05	1.97166	0.000115	1.97166		0.000261823	1.49968	-1.26e-05	1.49968	0.000237	1.49968		0.000264	1.49752	-1.3e-06	1.49752	0.000261	1.49752
	0.0004992	2.24299	-7.37266e-07	2.24299	0.000497725	2.24299		0.000301	1.88033	-3.2551e-07	1.88033	0.000300349	1.88033		0.000368459	1.89239	2.16398e-06	1.89239	0.000372787	1.89239		0.000309	1.85694	1.17e-07	1.85694	0.000309	1.85694			0.000373293	2.01363	-3.32e-05	2.01363	0.000111	2.01363		0.000299646	1.55009	-1.33e-05	1.55009	0.000273	1.55009		0.000278	1.50857	-1.14e-06	1.50857	0.000276	1.50857
	0.000512	2.28927	-7.17852e-07	2.28927	0.000510564	2.28927		0.000312	1.83876	-5.81633e-07	1.83876	0.000310837	1.83876		0.000394423	1.92389	1.73478e-06	1.92389	0.000397893	1.92389		0.000296	1.87307	2.83e-07	1.87307	0.000297	1.87307			0.000384934	2.03739	-3.46e-05	2.03739	0.000114	2.03739		0.000299705	1.5794	-1.43e-05	1.5794	0.000271	1.5794		0.000293	1.54276	-1.38e-06	1.54276	0.00029	1.54276
	0.0005376	2.36505	-4.84338e-07	2.36505	0.000536631	2.36505		0.00032	1.92725	-3.72959e-07	1.92725	0.000319254	1.92725		0.000394749	1.9848	1.88274e-06	1.9848	0.000398514	1.9848		0.000319	1.9357	1.21e-07	1.9357	0.000319	1.9357			0.000428493	2.1172	-3.69e-05	2.1172	0.000129	2.1172		0.000299617	1.60613	-1.52e-05	1.60613	0.000269	1.60613		0.0003	1.58219	-1.33e-06	1.58219	0.000297	1.58219
	0.0005472	2.38846	-9.6956e-08	2.38846	0.000547006	2.38846		0.000336	1.93255	-4.14286e-07	1.93255	0.000335171	1.93255		0.00040038	1.99131	1.11609e-06	1.99131	0.000402612	1.99131		0.000315	1.94137	2.29e-07	1.94137	0.000315	1.94137			0.000411463	2.13214	-3.76e-05	2.13214	0.00012	2.13214		0.000299325	1.6268	-1.61e-05	1.6268	0.000267	1.6268		0.000298	1.63834	-1.74e-06	1.63834	0.000295	1.63834
	0.000568	2.41585	-4.78452e-07	2.41585	0.000567043	2.41585		0.000342	2.02234	-8.87755e-07	2.02234	0.000340224	2.02234		0.00040925	2.10342	2.63019e-06	2.10342	0.00041451	2.10342		0.000333	1.98961	1.91e-07	1.98961	0.000333	1.98961			0.000422998	2.17162	-3.96e-05	2.17162	0.000122	2.17162		0.000327563	1.66343	-1.75e-05	1.66343	0.000293	1.66343		0.000318	1.64721	-1.84e-06	1.64721	0.000314	1.64721
	0.0005888	2.53036	-5.74413e-07	2.53036	0.000587651	2.53036		0.000355	2.01898	-5.96939e-07	2.01898	0.000353806	2.01898		0.000427541	2.12545	1.77089e-06	2.12545	0.000431083	2.12545		0.00034	2.02089	1.11e-07	2.02089	0.00034	2.02089			0.000452919	2.23452	-4.12e-05	2.23452	0.000133	2.23452		0.000334213	1.69608	-1.89e-05	1.69608	0.000296	1.69608		0.000322	1.65603	-1.87e-06	1.65603	0.000318	1.65603
	0.0006064	2.51734	-2.03735e-07	2.51734	0.000605993	2.51734		0.000368	2.01231	-3.30102e-07	2.01231	0.00036734	2.01231		0.000436895	2.16581	2.57536e-06	2.16581	0.000442046	2.16581		0.000352	2.06503	5.12e-08	2.06503	0.000352	2.06503			0.000468985	2.28221	-4.28e-05	2.28221	0.000137	2.28221		0.000338787	1.70983	-1.95e-05	1.70983	0.0003	1.70983		0.000337	1.75982	-1.2e-06	1.75982	0.000335	1.75982
	0.0006096	2.57532	-7.51827e-07	2.57532	0.000608096	2.57532		0.000379	2.06902	-5.5102e-07	2.06902	0.000377898	2.06902		0.000453217	2.20627	4.18017e-06	2.20627	0.000461577	2.20627		0.000357	2.10036	-5.2e-08	2.10036	0.000357	2.10036			0.000472921	2.28768	-4.43e-05	2.28768	0.000137	2.28768		0.000346609	1.77749	-2.16e-05	1.77749	0.000303	1.77749		0.000341	1.74779	-1.78e-06	1.74779	0.000337	1.74779
	0.0005888	2.60394	-4.20519e-07	2.60394	0.000587959	2.60394		0.000381	2.10443	-5.71429e-07	2.10443	0.000379857	2.10443		0.000466465	2.25422	1.16837e-06	2.25422	0.000468802	2.25422		0.000378	2.1274	2.69e-07	2.1274	0.000379	2.1274			0.000484577	2.36635	-4.52e-05	2.36635	0.00014	2.36635		0.000367647	1.81628	-2.25e-05	1.81628	0.000323	1.81628		0.000344	1.78408	-1.3e-06	1.78408	0.000341	1.78408
	0.0006304	2.62372	-4.61206e-07	2.62372	0.000629478	2.62372		0.000368	2.16784	-6.53061e-07	2.16784	0.000366694	2.16784		0.000467879	2.28103	3.62656e-06	2.28103	0.000475132	2.28103		0.000376	2.17575	8.94e-09	2.17575	0.000376	2.17575			0.000470504	2.38702	-4.68e-05	2.38702	0.000132	2.38702		0.000377296	1.82125	-2.36e-05	1.82125	0.00033	1.82125		0.000368	1.79557	-1.62e-06	1.79557	0.000365	1.79557
	0.0006592	2.77299	1.40817e-07	2.77299	0.000659482	2.77299		0.000394	2.30458	-4.78061e-07	2.30458	0.000393044	2.30458		0.000494634	2.35005	3.296e-06	2.35005	0.000501226	2.35005		0.000382	2.1986	3.97e-07	2.1986	0.000383	2.1986			0.000474064	2.43442	-4.73e-05	2.43442	0.000133	2.43442		0.000380995	1.85997	-2.48e-05	1.85997	0.000331	1.85997		0.000364	1.87189	-1.64e-06	1.87189	0.000361	1.87189
	0.00068	2.82755	-4.88572e-07	2.82755	0.000679023	2.82755		0.000412	2.36716	-3.42347e-07	2.36716	0.000411315	2.36716		0.00051305	2.34907	3.94814e-06	2.34907	0.000520946	2.34907		0.000385	2.23577	2.64e-07	2.23577	0.000386	2.23577			0.000531082	2.51125	-5.09e-05	2.51125	0.000152	2.51125		0.000397075	1.87825	-2.54e-05	1.87825	0.000346	1.87825		0.000384	1.88155	-1.64e-06	1.88155	0.000381	1.88155
	0.0006592	2.78427	-7.37266e-07	2.78427	0.000657725	2.78427		0.000425	2.40564	-5.35714e-07	2.40564	0.000423929	2.40564		0.000507341	2.40598	2.56452e-06	2.40598	0.00051247	2.40598		0.000408	2.27921	-7.16e-08	2.27921	0.000408	2.27921			0.000522616	2.5098	-5.18e-05	2.5098	0.000147	2.5098		0.000399597	1.9385	-2.62e-05	1.9385	0.000347	1.9385		0.000388	1.93313	-1.88e-06	1.93313	0.000384	1.93313
	0.000736	2.91596	-8.10715e-07	2.91596	0.000734379	2.91596		0.000412	2.47117	-6.02041e-07	2.47117	0.000410796	2.47117		0.000529662	2.42622	2.97044e-06	2.42622	0.000535603	2.42622		0.000415	2.30461	4.08e-07	2.30461	0.000416	2.30461			0.000528666	2.60528	-5.43e-05	2.60528	0.000146	2.60528		0.00040921	1.95215	-2.74e-05	1.95215	0.000354	1.95215		0.000395	1.96513	-1.3e-06	1.96513	0.000392	1.96513
	0.0007344	2.87346	-2.52374e-07	2.87346	0.000733895	2.87346		0.00046	2.43107	-6.78571e-07	2.43107	0.000458643	2.43107		0.000550389	2.49341	2.73483e-06	2.49341	0.000555859	2.49341		0.000434	2.38933	-9.01e-08	2.38933	0.000434	2.38933			0.000546968	2.64229	-5.58e-05	2.64229	0.000151	2.64229		0.000427244	1.98852	-2.95e-05	1.98852	0.000368	1.98852		0.000406	2.01058	-1.6e-06	2.01058	0.000403	2.01058
	0.0007392	2.88958	-6.02296e-07	2.88958	0.000737995	2.88958		0.000459	2.51649	-6.12245e-07	2.51649	0.000457776	2.51649		0.0005399	2.57473	1.29462e-06	2.57473	0.000542489	2.57473		0.000439	2.38685	2.85e-07	2.38685	0.00044	2.38685			0.000559484	2.65136	-5.62e-05	2.65136	0.000156	2.65136		0.000423294	2.04474	-3.11e-05	2.04474	0.000361	2.04474		0.000399	2.06359	-1.26e-06	2.06359	0.000396	2.06359
	0.000752	3.00455	-2.83044e-07	3.00455	0.000751434	3.00455		0.000462	2.52389	-6.27551e-07	2.52389	0.000460745	2.52389		0.000553973	2.55895	3.07969e-06	2.55895	0.000560132	2.55895		0.000445	2.4715	2.12e-07	2.4715	0.000445	2.4715			0.000579783	2.73942	-5.91e-05	2.73942	0.000161	2.73942		0.000446032	2.05944	-3.2e-05	2.05944	0.000382	2.05944		0.000425	2.07161	-1.83e-06	2.07161	0.000421	2.07161
	0.000744	3.03856	-6.69626e-07	3.03856	0.000742661	3.03856		0.00047	2.56368	-6.47959e-07	2.56368	0.000468704	2.56368		0.00057862	2.61899	3.35344e-06	2.61899	0.000585327	2.61899		0.000461	2.47493	2.15e-07	2.47493	0.000461	2.47493			0.000598058	2.76284	-5.96e-05	2.76284	0.000168	2.76284		0.000442255	2.09684	-3.34e-05	2.09684	0.000375	2.09684		0.000441	2.0743	-1.52e-06	2.0743	0.000438	2.0743
	0.0007984	3.0497	-5.43304e-07	3.0497	0.000797313	3.0497		0.000465	2.59132	-7.44898e-07	2.59132	0.00046351	2.59132		0.000562821	2.67594	3.443e-06	2.67594	0.000569707	2.67594		0.000472	2.53946	3.37e-07	2.53946	0.000473	2.53946			0.000616935	2.78207	-6.05e-05	2.78207	0.000174	2.78207		0.000464419	2.12858	-3.4e-05	2.12858	0.000396	2.12858		0.000437	2.08962	-2.28e-06	2.08962	0.000432	2.08962
	0.000768	3.11497	-9.74704e-07	3.11497	0.000766051	3.11497		0.000499	2.62394	-5.2551e-07	2.62394	0.000497949	2.62394		0.000607213	2.71476	3.20194e-06	2.71476	0.000613617	2.71476		0.000483	2.58487	7.52e-07	2.58487	0.000485	2.58487			0.000625892	2.85937	-6.3e-05	2.85937	0.000175	2.85937		0.000470827	2.17316	-3.52e-05	2.17316	0.0004	2.17316		0.000446	2.16256	-1.99e-06	2.16256	0.000442	2.16256
	0.0007984	3.20294	-1.09864e-07	3.20294	0.00079818	3.20294		0.00048	2.66681	-3.19898e-07	2.66681	0.00047936	2.66681		0.000626938	2.77382	2.65759e-06	2.77382	0.000632253	2.77382		0.00048	2.59946	-1.49e-08	2.59946	0.00048	2.59946			0.000633638	2.90883	-6.49e-05	2.90883	0.000175	2.90883		0.000485349	2.19805	-3.67e-05	2.19805	0.000412	2.19805		0.000451	2.19022	-1.66e-06	2.19022	0.000448	2.19022
	0.0008112	3.21544	-5.57787e-07	3.21544	0.000810084	3.21544		0.000499	2.68675	-7.34694e-07	2.68675	0.000497531	2.68675		0.000616198	2.81424	4.74858e-06	2.81424	0.000625695	2.81424		0.00049	2.68441	1.68e-07	2.68441	0.00049	2.68441			0.000650498	2.99473	-6.69e-05	2.99473	0.000179	2.99473		0.000477325	2.23014	-3.86e-05	2.23014	0.0004	2.23014		0.000471	2.23411	-1.51e-06	2.23411	0.000468	2.23411
	0.0008512	3.28262	-8.64001e-07	3.28262	0.000849472	3.28262		0.000507	2.7379	-5.5102e-07	2.7379	0.000505898	2.7379		0.000636365	2.82224	3.70264e-06	2.82224	0.00064377	2.82224		0.000512	2.69509	4.87e-07	2.69509	0.000513	2.69509			0.000670845	2.99407	-6.81e-05	2.99407	0.000186	2.99407		0.000504035	2.27171	-4e-05	2.27171	0.000424	2.27171		0.000485	2.27042	-1.9e-06	2.27042	0.000481	2.27042
	0.0008704	3.34831	-6.66012e-07	3.34831	0.000869068	3.34831		0.000532	2.76199	-8.26531e-07	2.76199	0.000530347	2.76199		0.000661123	2.9125	3.95142e-06	2.9125	0.000669026	2.9125		0.000517	2.74133	2.7e-07	2.74133	0.000518	2.74133			0.000685183	3.03811	-7.02e-05	3.03811	0.000189	3.03811		0.000508763	2.29729	-4.06e-05	2.29729	0.000428	2.29729		0.000472	2.27945	-1.77e-06	2.27945	0.000468	2.27945
	0.0008672	3.38721	-1.43326e-06	3.38721	0.000864334	3.38721		0.000544	2.83212	-4.93878e-07	2.83212	0.000543012	2.83212		0.000669438	2.95001	3.93686e-06	2.95001	0.000677312	2.95001		0.000525	2.76968	1.16e-07	2.76968	0.000525	2.76968			0.000696434	3.10774	-7.23e-05	3.10774	0.000191	3.10774		0.000512375	2.35877	-4.21e-05	2.35877	0.000428	2.35877		0.000502	2.35139	-1.79e-06	2.35139	0.000498	2.35139
	0.0008784	3.50361	-1.43037e-06	3.50361	0.000875539	3.50361		0.000542	2.82535	-5.56122e-07	2.82535	0.000540888	2.82535		0.000673222	2.9995	3.34572e-06	2.9995	0.000679913	2.9995		0.000527	2.81771	5.53e-07	2.81771	0.000528	2.81771			0.000704401	3.15014	-7.34e-05	3.15014	0.000193	3.15014		0.000529518	2.38344	-4.41e-05	2.38344	0.000441	2.38344		0.000509	2.35699	-1.97e-06	2.35699	0.000505	2.35699
	0.0008928	3.47015	-9.48474e-07	3.47015	0.000890903	3.47015		0.000549	2.90579	-5.40816e-07	2.90579	0.000547918	2.90579		0.000678967	3.02926	3.67889e-06	3.02926	0.000686325	3.02926		0.000542	2.85846	1.11e-07	2.85846	0.000542	2.85846			0.000734713	3.14652	-7.43e-05	3.14652	0.000204	3.14652		0.000534705	2.39683	-4.52e-05	2.39683	0.000444	2.39683		0.000521	2.42218	-1.96e-06	2.42218	0.000517	2.42218
	0.0009216	3.51584	-1.12013e-06	3.51584	0.00091936	3.51584		0.000558	2.88453	-8.0102e-07	2.88453	0.000556398	2.88453		0.000695726	3.06641	3.42719e-06	3.06641	0.00070258	3.06641		0.00056	2.90498	5.92e-07	2.90498	0.000561	2.90498			0.000738151	3.25178	-7.65e-05	3.25178	0.000203	3.25178		0.000547881	2.42441	-4.64e-05	2.42441	0.000455	2.42441		0.000531	2.47545	-1.54e-06	2.47545	0.000528	2.47545
	0.0009504	3.63816	-1.8501e-06	3.63816	0.0009467	3.63816		0.000576	2.94133	-8.52041e-07	2.94133	0.000574296	2.94133		0.000707456	3.13994	3.61336e-06	3.13994	0.000714683	3.13994		0.000562	2.95908	4.5e-07	2.95908	0.000563	2.95908			0.000749405	3.20369	-7.71e-05	3.20369	0.000207	3.20369		0.000555096	2.45665	-4.79e-05	2.45665	0.000459	2.45665		0.00053	2.48206	-2.07e-06	2.48206	0.000526	2.48206
	0.0009344	3.60399	-1.75603e-06	3.60399	0.000930888	3.60399		0.000594	3.03468	-8.41837e-07	3.03468	0.000592316	3.03468		0.000725996	3.1807	3.72336e-06	3.1807	0.000733443	3.1807		0.000564	3.00213	6.81e-07	3.00213	0.000565	3.00213			0.000755385	3.27461	-7.88e-05	3.27461	0.000207	3.27461		0.000565217	2.51366	-4.93e-05	2.51366	0.000467	2.51366		0.000538	2.48883	-1.59e-06	2.48883	0.000535	2.48883
	0.00096	3.72874	-1.72306e-06	3.72874	0.000956554	3.72874		0.000584	3.05459	-1.05612e-06	3.05459	0.000581888	3.05459		0.000728935	3.18327	3.63036e-06	3.18327	0.000736196	3.18327		0.000577	3.02453	5.41e-07	3.02453	0.000578	3.02453			0.00077297	3.33516	-8.1e-05	3.33516	0.000211	3.33516		0.000574031	2.52229	-5.02e-05	2.52229	0.000474	2.52229		0.000564	2.53774	-2.04e-06	2.53774	0.00056	2.53774
	0.001	3.75911	-2.00369e-06	3.75911	0.000995993	3.75911		0.0006	3.06784	-9.89796e-07	3.06784	0.00059802	3.06784		0.000753685	3.24558	3.84881e-06	3.24558	0.000761383	3.24558		0.000585	3.07377	6.46e-07	3.07377	0.000586	3.07377			0.000800887	3.36239	-8.39e-05	3.36239	0.000219	3.36239		0.000584393	2.54554	-5.15e-05	2.54554	0.000481	2.54554		0.000539	2.57403	-1.96e-06	2.57403	0.000535	2.57403
	0.0009904	3.8031	-2.08486e-06	3.8031	0.00098623	3.8031		0.000628	3.14327	-8.92857e-07	3.14327	0.000626214	3.14327		0.000764539	3.29455	4.41731e-06	3.29455	0.000773374	3.29455		0.0006	3.09289	4.99e-07	3.09289	0.000601	3.09289			0.000787361	3.47953	-8.6e-05	3.47953	0.00021	3.47953		0.000590023	2.58854	-5.33e-05	2.58854	0.000483	2.58854		0.000571	2.59856	-2.18e-06	2.59856	0.000567	2.59856
	0.00101	3.7906	-2.26901e-06	3.7906	0.00101	3.7906		0.000619	3.14659	-1.03571e-06	3.14659	0.000616929	3.14659		0.000775176	3.3393	3.43947e-06	3.3393	0.000782055	3.3393		0.000613	3.16018	1.29e-07	3.16018	0.000613	3.16018			0.00081265	3.53275	-8.87e-05	3.53275	0.000216	3.53275		0.000601927	2.63071	-5.51e-05	2.63071	0.000492	2.63071		0.000574	2.6074	-1.65e-06	2.6074	0.000571	2.6074
	0.00102	3.84237	-2.44779e-06	3.84237	0.00102	3.84237		0.000633	3.20095	-8.52041e-07	3.20095	0.000631296	3.20095		0.000782685	3.3393	3.69311e-06	3.3393	0.000790071	3.3393		0.000631	3.17403	4.84e-07	3.17403	0.000632	3.17403			0.000840044	3.54828	-8.97e-05	3.54828	0.000227	3.54828		0.000618368	2.65281	-5.64e-05	2.65281	0.000506	2.65281		0.000588	2.66282	-1.82e-06	2.66282	0.000584	2.66282
	0.00103	3.89763	-2.14189e-06	3.89763	0.00103	3.89763		0.000635	3.23026	-9.94898e-07	3.23026	0.00063301	3.23026		0.000788069	3.40343	4.0775e-06	3.40343	0.000796224	3.40343		0.000625	3.22747	7.58e-07	3.22747	0.000627	3.22747			0.000816331	3.57599	-9.15e-05	3.57599	0.000214	3.57599		0.000622283	2.6632	-5.66e-05	2.6632	0.000509	2.6632		0.000601	2.66969	-1.91e-06	2.66969	0.000597	2.66969
	0.00105	3.94666	-1.95546e-06	3.94666	0.00105	3.94666		0.000642	3.22219	-8.41837e-07	3.22219	0.000640316	3.22219		0.00081143	3.44744	3.42628e-06	3.44744	0.000818283	3.44744		0.000642	3.25735	3.81e-07	3.25735	0.000643	3.25735			0.000844929	3.60096	-9.29e-05	3.60096	0.000224	3.60096		0.000623481	2.72879	-5.83e-05	2.72879	0.000507	2.72879		0.0006	2.72249	-1.9e-06	2.72249	0.000596	2.72249
	0.00108	4.00346	-2.06069e-06	4.00346	0.00108	4.00346		0.000658	3.2754	-7.7551e-07	3.2754	0.000656449	3.2754		0.000818611	3.49693	3.45714e-06	3.49693	0.000825525	3.49693		0.00065	3.2991	6.71e-07	3.2991	0.000651	3.2991			0.000869437	3.68026	-9.43e-05	3.68026	0.000232	3.68026		0.000633508	2.72618	-5.9e-05	2.72618	0.000515	2.72618		0.000609	2.70174	-1.98e-06	2.70174	0.000605	2.70174
	0.00112	4.03004	-2.33138e-06	4.03004	0.00112	4.03004		0.000673	3.32193	-8.72449e-07	3.32193	0.000671255	3.32193		0.00083054	3.5374	3.01325e-06	3.5374	0.000836567	3.5374		0.000659	3.32903	4.19e-07	3.32903	0.00066	3.32903			0.000884387	3.73409	-9.69e-05	3.73409	0.000235	3.73409		0.000651489	2.77528	-6e-05	2.77528	0.000531	2.77528		0.000623	2.75471	-1.84e-06	2.75471	0.000619	2.75471
	0.00109	4.05307	-2.47299e-06	4.05307	0.00109	4.05307		0.000703	3.40129	-3.96939e-07	3.40129	0.000702206	3.40129		0.000843913	3.58118	4.26281e-06	3.58118	0.000852439	3.58118		0.000665	3.39851	2.11e-07	3.39851	0.000665	3.39851			0.000907548	3.76113	-9.87e-05	3.76113	0.000242	3.76113		0.000661957	2.76714	-6.08e-05	2.76714	0.00054	2.76714		0.000641	2.79874	-1.55e-06	2.79874	0.000638	2.79874
	0.00112	4.08946	-2.69679e-06	4.08946	0.00111	4.08946		0.000681	3.43271	-8.92857e-07	3.43271	0.000679214	3.43271		0.000853081	3.60274	4.13847e-06	3.60274	0.000861358	3.60274		0.000677	3.41244	4.99e-08	3.41244	0.000677	3.41244			0.000898765	3.81652	-0.000101	3.81652	0.000235	3.81652		0.000678451	2.78545	-6.17e-05	2.78545	0.000555	2.78545		0.000635	2.87717	-1.92e-06	2.87717	0.000631	2.87717
	0.00112	4.13991	-2.17132e-06	4.13991	0.00112	4.13991		0.000701	3.44327	-8.52041e-07	3.44327	0.000699296	3.44327		0.000862174	3.69702	4.18583e-06	3.69702	0.000870546	3.69702		0.000692	3.48583	4.86e-07	3.48583	0.000693	3.48583			0.0009164	3.85251	-0.000102	3.85251	0.000241	3.85251		0.000677129	2.81984	-6.25e-05	2.81984	0.000552	2.81984		0.000643	2.91866	-2.21e-06	2.91866	0.000639	2.91866
	0.00116	4.26043	-2.75514e-06	4.26043	0.00115	4.26043		0.0007	3.48768	-9.33673e-07	3.48768	0.000698133	3.48768		0.000861481	3.71848	4.32872e-06	3.71848	0.000870138	3.71848		0.000692	3.5201	2.93e-07	3.5201	0.000693	3.5201			0.00092536	3.93919	-0.000106	3.93919	0.000239	3.93919		0.000690815	2.84202	-6.32e-05	2.84202	0.000564	2.84202		0.000661	2.94757	-2.12e-06	2.94757	0.000657	2.94757
	0.00115	4.22768	-2.68265e-06	4.22768	0.00114	4.22768		0.000725	3.55317	-6.68367e-07	3.55317	0.000723663	3.55317		0.000893071	3.7591	3.88292e-06	3.7591	0.000900837	3.7591		0.000701	3.52715	3.8e-07	3.52715	0.000702	3.52715			0.000930312	3.96079	-0.000107	3.96079	0.00024	3.96079		0.000702341	2.904	-6.56e-05	2.904	0.000571	2.904		0.00067	2.97942	-2e-06	2.97942	0.000666	2.97942
	0.00117	4.37084	-3.56847e-06	4.37084	0.00116	4.37084		0.000719	3.5018	-1.03571e-06	3.5018	0.000716929	3.5018		0.000897059	3.80522	5.61314e-06	3.80522	0.000908285	3.80522		0.000705	3.58703	4.99e-07	3.58703	0.000706	3.58703			0.000958533	4.03122	-0.00011	4.03122	0.000247	4.03122		0.000721507	2.91042	-6.69e-05	2.91042	0.000588	2.91042		0.000673	3.04438	-2.14e-06	3.04438	0.000669	3.04438
	0.0012	4.28928	-3.03833e-06	4.28928	0.00119	4.28928		0.000732	3.52523	-8.57143e-07	3.52523	0.000730286	3.52523		0.000904479	3.86251	4.23753e-06	3.86251	0.000912954	3.86251		0.000723	3.62366	8.87e-08	3.62366	0.000723	3.62366			0.000941392	4.11333	-0.000112	4.11333	0.000236	4.11333		0.000715522	2.96815	-6.83e-05	2.96815	0.000579	2.96815		0.000679	3.03784	-1.84e-06	3.03784	0.000675	3.03784
	0.0012	4.39266	-2.74141e-06	4.39266	0.00119	4.39266		0.000748	3.59429	-8.77551e-07	3.59429	0.000746245	3.59429		0.000939728	3.92061	3.66461e-06	3.92061	0.000947057	3.92061		0.000729	3.69297	4.75e-07	3.69297	0.00073	3.69297			0.000970601	4.11881	-0.000114	4.11881	0.000247	4.11881		0.0007242	2.9849	-6.95e-05	2.9849	0.000585	2.9849		0.000694	3.06706	-2.01e-06	3.06706	0.00069	3.06706
	0.00124	4.43846	-2.69339e-06	4.43846	0.00123	4.43846		0.000749	3.65453	-9.69388e-07	3.65453	0.000747061	3.65453		0.000938563	3.94984	4.07281e-06	3.94984	0.000946709	3.94984		0.000752	3.73645	2.58e-07	3.73645	0.000753	3.73645			0.001	4.19838	-0.000116	4.19838	0.000258	4.19838		0.000736887	3.02461	-7.03e-05	3.02461	0.000596	3.02461		0.000712	3.1025	-1.73e-06	3.1025	0.000709	3.1025
	0.00124	4.48397	-3.47481e-06	4.48397	0.00123	4.48397		0.000772	3.65206	-6.78571e-07	3.65206	0.000770643	3.65206		0.000958348	4.00504	3.75058e-06	4.00504	0.000965849	4.00504		0.000758	3.77988	6.62e-07	3.77988	0.000759	3.77988			0.000987522	4.21969	-0.000117	4.21969	0.000249	4.21969		0.000754312	3.07305	-7.2e-05	3.07305	0.00061	3.07305		0.000721	3.10354	-1.45e-06	3.10354	0.000718	3.10354
	0.00126	4.55048	-3.05826e-06	4.55048	0.00125	4.55048		0.000775	3.6787	-7.55102e-07	3.6787	0.00077349	3.6787		0.000955685	4.02979	4.44633e-06	4.02979	0.000964578	4.02979		0.000764	3.84998	5.2e-07	3.84998	0.000765	3.84998			0.00103	4.25827	-0.00012	4.25827	0.000263	4.25827		0.000753294	3.09345	-7.33e-05	3.09345	0.000607	3.09345		0.000719	3.14737	-1.63e-06	3.14737	0.000716	3.14737
	0.00126	4.61087	-3.57901e-06	4.61087	0.00125	4.61087		0.000789	3.75904	-8.62245e-07	3.75904	0.000787276	3.75904		0.000981493	4.07921	4.35678e-06	4.07921	0.000990207	4.07921		0.000783	3.85243	4.91e-07	3.85243	0.000784	3.85243			0.00105	4.35441	-0.000122	4.35441	0.000269	4.35441		0.000772116	3.09321	-7.37e-05	3.09321	0.000625	3.09321		0.000722	3.19319	-2.13e-06	3.19319	0.000718	3.19319
	0.0013	4.58193	-3.31738e-06	4.58193	0.00129	4.58193		0.000788	3.73225	-9.69388e-07	3.73225	0.000786061	3.73225		0.000993018	4.10458	4.92361e-06	4.10458	0.001	4.10458		0.000774	3.9195	4.19e-07	3.9195	0.000775	3.9195			0.00105	4.4216	-0.000124	4.4216	0.000263	4.4216		0.000772349	3.13701	-7.51e-05	3.13701	0.000622	3.13701		0.000733	3.21126	-2.41e-06	3.21126	0.000728	3.21126
	0.00132	4.71928	-4.10748e-06	4.71928	0.00131	4.71928		0.000814	3.84513	-1.12755e-06	3.84513	0.000811745	3.84513		0.00102	4.19182	4.43031e-06	4.19182	0.00103	4.19182		0.000794	3.93984	4.96e-07	3.93984	0.000795	3.93984			0.00104	4.39421	-0.000125	4.39421	0.00026	4.39421		0.000783785	3.20046	-7.68e-05	3.20046	0.00063	3.20046		0.000753	3.25285	-1.79e-06	3.25285	0.000749	3.25285
	0.00132	4.73277	-3.41437e-06	4.73277	0.00131	4.73277		0.000825	3.85834	-1.04082e-06	3.85834	0.000822918	3.85834		0.00102	4.25642	4.34725e-06	4.25642	0.00103	4.25642		0.000811	3.98625	5.05e-07	3.98625	0.000812	3.98625			0.00108	4.43	-0.000126	4.43	0.000276	4.43		0.000793106	3.22106	-7.76e-05	3.22106	0.000638	3.22106		0.000755	3.30311	-2.29e-06	3.30311	0.00075	3.30311
	0.00136	4.79771	-3.47398e-06	4.79771	0.00135	4.79771		0.000824	3.88358	-9.13265e-07	3.88358	0.000822173	3.88358		0.00103	4.27479	4.22211e-06	4.27479	0.00104	4.27479		0.000814	4.03059	4.6e-07	4.03059	0.000815	4.03059			0.0011	4.48453	-0.000129	4.48453	0.000282	4.48453		0.000799588	3.24323	-7.94e-05	3.24323	0.000641	3.24323		0.000765	3.3612	-2.01e-06	3.3612	0.000761	3.3612
	0.00135	4.74421	-3.87076e-06	4.74421	0.00134	4.74421		0.000847	3.92739	-9.84694e-07	3.92739	0.000845031	3.92739		0.00103	4.26339	4.57278e-06	4.26339	0.00104	4.26339		0.000822	4.05646	4.54e-07	4.05646	0.000823	4.05646			0.0011	4.55171	-0.000131	4.55171	0.000277	4.55171		0.000812502	3.25624	-8.04e-05	3.25624	0.000652	3.25624		0.000775	3.36536	-2e-06	3.36536	0.000771	3.36536
	0.00134	4.7935	-4.05037e-06	4.7935	0.00133	4.7935		0.000842	3.97	-8.82653e-07	3.97	0.000840235	3.97		0.00104	4.34228	4.2015e-06	4.34228	0.00105	4.34228		0.000826	4.09277	7.8e-07	4.09277	0.000828	4.09277			0.00109	4.61958	-0.000134	4.61958	0.000269	4.61958		0.000818439	3.2889	-8.17e-05	3.2889	0.000655	3.2889		0.000787	3.38666	-2.57e-06	3.38666	0.000782	3.38666
	0.0014	4.81109	-3.57126e-06	4.81109	0.00139	4.81109		0.00084	3.98932	-1.10714e-06	3.98932	0.000837786	3.98932		0.00106	4.37453	3.56003e-06	4.37453	0.00107	4.37453		0.000847	4.13471	6.51e-07	4.13471	0.000848	4.13471			0.00112	4.62199	-0.000135	4.62199	0.00028	4.62199		0.000833939	3.30906	-8.35e-05	3.30906	0.000667	3.30906		0.000794	3.40743	-1.83e-06	3.40743	0.00079	3.40743
	0.00139	4.8876	-3.39455e-06	4.8876	0.00138	4.8876		0.000873	4.05268	-9.18367e-07	4.05268	0.000871163	4.05268		0.00106	4.42499	4.66453e-06	4.42499	0.00107	4.42499		0.000845	4.17442	5.28e-07	4.17442	0.000846	4.17442			0.00113	4.66104	-0.000137	4.66104	0.000281	4.66104		0.000834043	3.34526	-8.53e-05	3.34526	0.000663	3.34526		0.000795	3.42961	-1.7e-06	3.42961	0.000792	3.42961
	0.0014	4.92031	-4.41207e-06	4.92031	0.00139	4.92031		0.000871	4.12012	-1.04082e-06	4.12012	0.000868918	4.12012		0.00108	4.44894	3.64494e-06	4.44894	0.00109	4.44894		0.000858	4.22139	5.27e-07	4.22139	0.000859	4.22139			0.00115	4.74123	-0.00014	4.74123	0.000285	4.74123		0.000848918	3.3676	-8.67e-05	3.3676	0.000676	3.3676		0.000807	3.44661	-2.02e-06	3.44661	0.000803	3.44661
	0.00142	4.9705	-3.89637e-06	4.9705	0.00141	4.9705		0.000872	4.19715	-1.11224e-06	4.19715	0.000869776	4.19715		0.00109	4.47291	4.50686e-06	4.47291	0.0011	4.47291		0.000874	4.28872	9.33e-08	4.28872	0.000874	4.28872			0.00115	4.7744	-0.000141	4.7744	0.000285	4.7744		0.000854344	3.3891	-8.8e-05	3.3891	0.000678	3.3891		0.000816	3.49198	-1.95e-06	3.49198	0.000812	3.49198
	0.00144	5.03119	-3.89152e-06	5.03119	0.00143	5.03119		0.000886	4.21517	-1.04082e-06	4.21517	0.000883918	4.21517		0.00111	4.52321	4.62094e-06	4.52321	0.00112	4.52321		0.000888	4.3034	2.04e-07	4.3034	0.000888	4.3034			0.00116	4.79501	-0.000144	4.79501	0.000282	4.79501		0.000856074	3.45513	-9.04e-05	3.45513	0.000675	3.45513		0.000817	3.54504	-2.2e-06	3.54504	0.000813	3.54504
	0.00146	4.98307	-3.60885e-06	4.98307	0.00145	4.98307		0.000899	4.23632	-8.62245e-07	4.23632	0.000897275	4.23632		0.00112	4.58496	3.38314e-06	4.58496	0.00113	4.58496		0.00088	4.33768	4.44e-07	4.33768	0.000881	4.33768			0.00119	4.84174	-0.000145	4.84174	0.000294	4.84174		0.00088453	3.50003	-9.27e-05	3.50003	0.000699	3.50003		0.000839	3.58591	-2.15e-06	3.58591	0.000835	3.58591
	0.00148	5.06978	-3.67538e-06	5.06978	0.00147	5.06978		0.000914	4.22624	-1.22449e-06	4.22624	0.000911551	4.22624		0.00111	4.60763	4.10128e-06	4.60763	0.00112	4.60763		0.000897	4.39941	1.54e-07	4.39941	0.000897	4.39941			0.00123	4.90034	-0.000148	4.90034	0.000308	4.90034		0.000887306	3.51309	-9.33e-05	3.51309	0.000701	3.51309		0.00084	3.62374	-1.97e-06	3.62374	0.000836	3.62374
	0.0015	5.11449	-4.02528e-06	5.11449	0.00149	5.11449		0.000924	4.29613	-1.08163e-06	4.29613	0.000921837	4.29613		0.00114	4.64132	2.74462e-06	4.64132	0.00115	4.64132		0.000909	4.43584	1.88e-07	4.43584	0.000909	4.43584			0.00122	4.89549	-0.000149	4.89549	0.000301	4.89549		0.000905529	3.55309	-9.5e-05	3.55309	0.000716	3.55309		0.000861	3.62494	-2.02e-06	3.62494	0.000857	3.62494
	0.00151	5.11734	-4.24526e-06	5.11734	0.0015	5.11734		0.000935	4.33334	-1.0051e-06	4.33334	0.00093299	4.33334		0.00116	4.71766	3.95711e-06	4.71766	0.00117	4.71766		0.000925	4.48598	4.05e-07	4.48598	0.000926	4.48598			0.00123	4.99749	-0.000152	4.99749	0.000303	4.99749		0.000907343	3.57836	-9.57e-05	3.57836	0.000716	3.57836		0.000849	3.66001	-2.05e-06	3.66001	0.000845	3.66001
	0.00151	5.15913	-3.94297e-06	5.15913	0.0015	5.15913		0.000941	4.30909	-1.35204e-06	4.30909	0.000938296	4.30909		0.00117	4.73122	3.69711e-06	4.73122	0.00118	4.73122		0.000927	4.51002	2.23e-07	4.51002	0.000927	4.51002			0.00123	5.02862	-0.000154	5.02862	0.000298	5.02862		0.000916432	3.58089	-9.71e-05	3.58089	0.000722	3.58089		0.000873	3.69186	-2.07e-06	3.69186	0.000869	3.69186
	0.00154	5.19303	-3.54121e-06	5.19303	0.00153	5.19303		0.000946	4.37607	-1.40816e-06	4.37607	0.000943184	4.37607		0.00117	4.76341	4.29525e-06	4.76341	0.00118	4.76341		0.000939	4.56108	3.68e-07	4.56108	0.00094	4.56108			0.00126	5.06686	-0.000157	5.06686	0.000307	5.06686		0.000935976	3.57735	-9.77e-05	3.57735	0.000741	3.57735		0.000887	3.70171	-1.6e-06	3.70171	0.000884	3.70171
	0.00158	5.27434	-3.87572e-06	5.27434	0.00157	5.27434		0.00096	4.36803	-6.63265e-07	4.36803	0.000958673	4.36803		0.00119	4.76846	4.24386e-06	4.76846	0.0012	4.76846		0.000947	4.55406	7e-07	4.55406	0.000948	4.55406			0.00128	5.13086	-0.000158	5.13086	0.000312	5.13086		0.000939866	3.59446	-9.85e-05	3.59446	0.000743	3.59446		0.000889	3.76938	-2.09e-06	3.76938	0.000885	3.76938
	0.00157	5.33511	-4.52948e-06	5.33511	0.00156	5.33511		0.000985	4.3953	-1.31122e-06	4.3953	0.000982378	4.3953		0.0012	4.82465	4.01142e-06	4.82465	0.00121	4.82465		0.000957	4.62881	4.48e-07	4.62881	0.000958	4.62881			0.00127	5.17076	-0.000161	5.17076	0.000307	5.17076		0.000931998	3.64386	-0.0001	3.64386	0.000732	3.64386		0.000899	3.79933	-2.42e-06	3.79933	0.000894	3.79933
	0.00158	5.29531	-4.07454e-06	5.29531	0.00157	5.29531		0.000979	4.39141	-1.28061e-06	4.39141	0.000976439	4.39141		0.00121	4.8806	3.70444e-06	4.8806	0.00122	4.8806		0.000969	4.70769	7.88e-07	4.70769	0.000971	4.70769			0.00128	5.19004	-0.000163	5.19004	0.000306	5.19004		0.000962908	3.66588	-0.000101	3.66588	0.000761	3.66588		0.000909	3.86615	-2.25e-06	3.86615	0.000904	3.86615
	0.00159	5.34539	-3.70925e-06	5.34539	0.00158	5.34539		0.000988	4.48834	-1e-06	4.48834	0.000986	4.48834		0.00123	4.9217	3.68233e-06	4.9217	0.00124	4.9217		0.000983	4.72827	4.99e-07	4.72827	0.000984	4.72827			0.00131	5.19202	-0.000165	5.19202	0.000317	5.19202		0.000965708	3.67949	-0.000103	3.67949	0.000759	3.67949		0.000922	3.86242	-1.92e-06	3.86242	0.000918	3.86242
	0.00163	5.42091	-3.99946e-06	5.42091	0.00162	5.42091		0.000995	4.49953	-1.19388e-06	4.49953	0.000992612	4.49953		0.00124	4.93703	3.6415e-06	4.93703	0.00125	4.93703		0.000984	4.76757	2.62e-07	4.76757	0.000985	4.76757			0.00131	5.35857	-0.000167	5.35857	0.000315	5.35857		0.000973615	3.72898	-0.000105	3.72898	0.000763	3.72898		0.000918	3.90583	-2.47e-06	3.90583	0.000913	3.90583
	0.00162	5.41357	-3.40074e-06	5.41357	0.00161	5.41357		0.00102	4.58501	-1.11735e-06	4.58501	0.00102	4.58501		0.00125	4.98134	3.39253e-06	4.98134	0.00126	4.98134		0.000995	4.79538	5.52e-07	4.79538	0.000996	4.79538			0.00135	5.37875	-0.000169	5.37875	0.000326	5.37875		0.000985937	3.77761	-0.000107	3.77761	0.000772	3.77761		0.00094	3.97294	-1.9e-06	3.97294	0.000936	3.97294
	0.00162	5.52083	-3.90691e-06	5.52083	0.00161	5.52083		0.00101	4.57397	-1.30102e-06	4.57397	0.00101	4.57397		0.00125	5.03611	4.28375e-06	5.03611	0.00126	5.03611		0.000999	4.85787	7.79e-07	4.85787	0.001	4.85787			0.00135	5.37287	-0.000172	5.37287	0.000324	5.37287		0.001	3.77384	-0.000108	3.77384	0.000784	3.77384		0.000949383	3.96929	-2.38e-06	3.96929	0.000945	3.96929
	0.00165	5.52866	-3.84371e-06	5.52866	0.00164	5.52866		0.00101	4.53596	-1.10204e-06	4.53596	0.00101	4.53596		0.00125	5.06436	3.49967e-06	5.06436	0.00126	5.06436		0.00101	4.89529	3.33e-07	4.89529	0.00101	4.89529			0.00136	5.46492	-0.000175	5.46492	0.000325	5.46492		0.000998852	3.82932	-0.00011	3.82932	0.000779	3.82932		0.000951	4.00028	-2.98e-06	4.00028	0.000945	4.00028
	0.00168	5.52053	-3.91902e-06	5.52053	0.00167	5.52053		0.00103	4.60554	-1.2449e-06	4.60554	0.00103	4.60554		0.00129	5.09011	3.50469e-06	5.09011	0.0013	5.09011		0.00103	4.91884	2.27e-07	4.91884	0.00103	4.91884			0.00137	5.47962	-0.000176	5.47962	0.000329	5.47962		0.00103	3.85017	-0.000112	3.85017	0.000805	3.85017		0.000952234	4.03716	-2.12e-06	4.03716	0.000948	4.03716
	0.00168	5.58384	-3.10702e-06	5.58384	0.00167	5.58384		0.00105	4.61672	-1.29082e-06	4.61672	0.00105	4.61672		0.00129	5.12379	2.49099e-06	5.12379	0.00129	5.12379		0.00103	4.95581	5.73e-07	4.95581	0.00103	4.95581			0.00137	5.4975	-0.000178	5.4975	0.000324	5.4975		0.00103	3.88668	-0.000113	3.88668	0.000804	3.88668		0.000969216	4.05004	-2.43e-06	4.05004	0.000964	4.05004
	0.00173	5.58258	-3.55546e-06	5.58258	0.00172	5.58258		0.00105	4.6401	-1.44388e-06	4.6401	0.00105	4.6401		0.00133	5.1717	2.64585e-06	5.1717	0.00134	5.1717		0.00104	5.01327	4.14e-07	5.01327	0.00104	5.01327			0.0014	5.56956	-0.00018	5.56956	0.000332	5.56956		0.00104	3.88679	-0.000114	3.88679	0.000812	3.88679		0.000986197	4.06387	-2.45e-06	4.06387	0.000981	4.06387
	0.00173	5.68473	-3.28351e-06	5.68473	0.00172	5.68473		0.00108	4.70852	-1.12755e-06	4.70852	0.00108	4.70852		0.00133	5.20672	2.32396e-06	5.20672	0.00133	5.20672		0.00105	5.03854	2.99e-07	5.03854	0.00105	5.03854			0.00143	5.62971	-0.000185	5.62971	0.000336	5.62971		0.00104	3.9224	-0.000115	3.9224	0.000809	3.9224		0.000987623	4.12544	-2.49e-06	4.12544	0.000983	4.12544
	0.00174	5.66016	-3.19098e-06	5.66016	0.00173	5.66016		0.00108	4.64776	-1.68878e-06	4.64776	0.00108	4.64776		0.00133	5.23996	2.81944e-06	5.23996	0.00134	5.23996		0.00106	5.05037	7.11e-07	5.05037	0.00106	5.05037			0.00143	5.61354	-0.000186	5.61354	0.000337	5.61354		0.00105	3.98685	-0.000117	3.98685	0.000816	3.98685		0.001	4.16402	-2.71e-06	4.16402	0.000995	4.16402
	0.00176	5.73451	-3.10393e-06	5.73451	0.00175	5.73451		0.00109	4.70655	-1.51531e-06	4.70655	0.00109	4.70655		0.00135	5.3072	2.90581e-06	5.3072	0.00136	5.3072		0.00107	5.13856	5.99e-07	5.13856	0.00107	5.13856			0.00144	5.68272	-0.000189	5.68272	0.000336	5.68272		0.00105	3.9787	-0.000119	3.9787	0.000812	3.9787		0.00101	4.20871	-2.63e-06	4.20871	0.001	4.20871
	0.00173	5.76781	-3.75314e-06	5.76781	0.00172	5.76781		0.0011	4.7286	-1.44388e-06	4.7286	0.0011	4.7286		0.00135	5.34825	3.01289e-06	5.34825	0.00136	5.34825		0.00108	5.19409	5.46e-07	5.19409	0.00108	5.19409			0.00143	5.71655	-0.000191	5.71655	0.000331	5.71655		0.00108	4.00943	-0.000121	4.00943	0.000838	4.00943		0.00103	4.21567	-2.64e-06	4.21567	0.00102	4.21567
	0.00178	5.78702	-2.79252e-06	5.78702	0.00177	5.78702		0.00108	4.74545	-1.05612e-06	4.74545	0.00108	4.74545		0.00137	5.37814	3.16931e-06	5.37814	0.00138	5.37814		0.0011	5.25051	2.12e-07	5.25051	0.0011	5.25051			0.00147	5.78893	-0.000193	5.78893	0.000343	5.78893		0.00108	4.04214	-0.000122	4.04214	0.000836	4.04214		0.00102	4.23754	-2.25e-06	4.23754	0.00102	4.23754
	0.00181	5.81044	-3.59636e-06	5.81044	0.0018	5.81044		0.00111	4.75238	-1.34184e-06	4.75238	0.00111	4.75238		0.00138	5.45138	2.67305e-06	5.45138	0.00139	5.45138		0.0011	5.30767	6.14e-07	5.30767	0.0011	5.30767			0.0015	5.78878	-0.000197	5.78878	0.000347	5.78878		0.00108	4.02649	-0.000122	4.02649	0.000835	4.02649		0.00104	4.28797	-2.67e-06	4.28797	0.00103	4.28797
	0.00179	5.87615	-2.96635e-06	5.87615	0.00178	5.87615		0.00113	4.80101	-1.14796e-06	4.80101	0.00113	4.80101		0.00139	5.45051	1.69046e-06	5.45051	0.00139	5.45051		0.00112	5.35255	8.11e-07	5.35255	0.00112	5.35255			0.00148	5.85087	-0.0002	5.85087	0.000341	5.85087		0.0011	4.08483	-0.000124	4.08483	0.000852	4.08483		0.00104	4.30743	-2.44e-06	4.30743	0.00104	4.30743
	0.00182	5.85427	-3.04297e-06	5.85427	0.00181	5.85427		0.00112	4.85407	-1.67347e-06	4.85407	0.00112	4.85407		0.0014	5.49645	2.40354e-06	5.49645	0.0014	5.49645		0.00112	5.41487	6.91e-07	5.41487	0.00112	5.41487			0.00151	5.91117	-0.000202	5.91117	0.000346	5.91117		0.00112	4.10736	-0.000125	4.10736	0.000869	4.10736		0.00105	4.36845	-2.7e-06	4.36845	0.00104	4.36845
	0.00184	5.91697	-3.71731e-06	5.91697	0.00183	5.91697		0.00114	4.88104	-1.03571e-06	4.88104	0.00114	4.88104		0.0014	5.51894	1.73748e-06	5.51894	0.0014	5.51894		0.00113	5.40691	4.6e-07	5.40691	0.00113	5.40691			0.00151	5.94148	-0.000205	5.94148	0.000341	5.94148		0.00112	4.12803	-0.000128	4.12803	0.000865	4.12803		0.00106	4.4059	-2.83e-06	4.4059	0.00105	4.4059
	0.00189	6.05741	-3.60513e-06	6.05741	0.00188	6.05741		0.00115	4.86141	-1.14796e-06	4.86141	0.00115	4.86141		0.00143	5.55898	1.16151e-06	5.55898	0.00143	5.55898		0.00114	5.48089	-1.09e-08	5.48089	0.00114	5.48089			0.00154	6.01298	-0.000209	6.01298	0.000346	6.01298		0.00113	4.17598	-0.00013	4.17598	0.000871	4.17598		0.00107	4.39622	-2.8e-06	4.39622	0.00106	4.39622
	0.00187	6.06369	-3.38536e-06	6.06369	0.00186	6.06369		0.00118	4.90885	-1.47449e-06	4.90885	0.00118	4.90885		0.00144	5.59965	1.72843e-06	5.59965	0.00144	5.59965		0.00115	5.54922	3.35e-07	5.54922	0.00115	5.54922			0.00154	5.99272	-0.00021	5.99272	0.000346	5.99272		0.00114	4.19259	-0.000131	4.19259	0.000878	4.19259		0.00108	4.41508	-2.25e-06	4.41508	0.00108	4.41508
	0.00187	6.00068	-2.9111e-06	6.00068	0.00186	6.00068		0.00117	4.92567	-1.39286e-06	4.92567	0.00117	4.92567		0.00145	5.64172	2.87083e-08	5.64172	0.00145	5.64172		0.00115	5.53965	4.13e-07	5.53965	0.00115	5.53965			0.00155	6.05543	-0.000213	6.05543	0.000351	6.05543		0.00114	4.22562	-0.000132	4.22562	0.000875	4.22562		0.00109	4.47278	-2.87e-06	4.47278	0.00108	4.47278
	0.00192	6.1002	-3.10713e-06	6.1002	0.00191	6.1002		0.00117	4.95228	-1.2398e-06	4.95228	0.00117	4.95228		0.00147	5.69245	3.11956e-06	5.69245	0.00148	5.69245		0.00118	5.61516	7.59e-07	5.61516	0.00118	5.61516			0.00158	6.09554	-0.000215	6.09554	0.000356	6.09554		0.00116	4.24167	-0.000135	4.24167	0.000891	4.24167		0.00109	4.48989	-2.62e-06	4.48989	0.00108	4.48989
	0.00192	6.10719	-3.35985e-06	6.10719	0.00191	6.10719		0.0012	5.01007	-1.33673e-06	5.01007	0.0012	5.01007		0.00149	5.73541	1.73363e-06	5.73541	0.00149	5.73541		0.00117	5.65226	3.75e-07	5.65226	0.00117	5.65226			0.00158	6.10375	-0.000217	6.10375	0.000355	6.10375		0.00117	4.23299	-0.000135	4.23299	0.0009	4.23299		0.00112	4.49157	-2.88e-06	4.49157	0.00111	4.49157
	0.0019	6.18189	-2.75349e-06	6.18189	0.00189	6.18189		0.0012	4.99633	-1.27041e-06	4.99633	0.0012	4.99633		0.00149	5.77387	1.19508e-06	5.77387	0.00149	5.77387		0.00118	5.6859	7.98e-07	5.6859	0.00118	5.6859			0.00161	6.14204	-0.00022	6.14204	0.000359	6.14204		0.00117	4.26283	-0.000136	4.26283	0.000899	4.26283		0.00112	4.54319	-3.27e-06	4.54319	0.00111	4.54319
	0.00194	6.2024	-2.95695e-06	6.2024	0.00193	6.2024		0.00119	4.99802	-1.35714e-06	4.99802	0.00119	4.99802		0.0015	5.8051	1.98397e-06	5.8051	0.0015	5.8051		0.0012	5.71213	3.29e-07	5.71213	0.0012	5.71213			0.00161	6.22956	-0.000223	6.22956	0.000355	6.22956		0.00119	4.31133	-0.000137	4.31133	0.000916	4.31133		0.00113	4.55835	-2.53e-06	4.55835	0.00112	4.55835
	0.00195	6.31444	-4.04831e-06	6.31444	0.00194	6.31444		0.00121	5.07708	-1.38776e-06	5.07708	0.00121	5.07708		0.00153	5.83868	1.15645e-06	5.83868	0.00153	5.83868		0.00121	5.7438	2.35e-07	5.7438	0.00121	5.7438			0.00163	6.18985	-0.000224	6.18985	0.000366	6.18985		0.0012	4.31874	-0.000138	4.31874	0.000924	4.31874		0.00113	4.61977	-2.53e-06	4.61977	0.00112	4.61977
	0.00198	6.2787	-3.08998e-06	6.2787	0.00197	6.2787		0.00122	5.08976	-1.53571e-06	5.08976	0.00122	5.08976		0.00153	5.89791	1.80761e-06	5.89791	0.00153	5.89791		0.00122	5.77524	2.97e-07	5.77524	0.00122	5.77524			0.00163	6.28154	-0.000226	6.28154	0.000365	6.28154		0.0012	4.34546	-0.00014	4.34546	0.000921	4.34546		0.00115	4.60558	-2.92e-06	4.60558	0.00114	4.60558
	0.002	6.31581	-2.83218e-06	6.31581	0.00199	6.31581		0.00124	5.09507	-1.41837e-06	5.09507	0.00124	5.09507		0.00153	5.91639	3.23944e-07	5.91639	0.00153	5.91639		0.00122	5.85537	3.84e-07	5.85537	0.00122	5.85537			0.00162	6.33567	-0.000229	6.33567	0.000357	6.33567		0.0012	4.37822	-0.000142	4.37822	0.000916	4.37822		0.00115	4.70081	-3.34e-06	4.70081	0.00114	4.70081
	0.00202	6.3256	-3.1032e-06	6.3256	0.00201	6.3256		0.00125	5.10132	-1.54592e-06	5.10132	0.00125	5.10132		0.00155	5.97481	1.08604e-06	5.97481	0.00155	5.97481		0.00124	5.85704	3.09e-07	5.85704	0.00124	5.85704			0.00168	6.40412	-0.000232	6.40412	0.000372	6.40412		0.00123	4.41595	-0.000144	4.41595	0.000941	4.41595		0.00117	4.72202	-2.78e-06	4.72202	0.00116	4.72202
	0.00203	6.38546	-2.61511e-06	6.38546	0.00202	6.38546		0.00126	5.13133	-1.30612e-06	5.13133	0.00126	5.13133		0.00155	5.98325	1.08519e-06	5.98325	0.00155	5.98325		0.00124	5.9062	5.8e-07	5.9062	0.00124	5.9062			0.00168	6.42554	-0.000235	6.42554	0.000367	6.42554		0.00123	4.46722	-0.000146	4.46722	0.000938	4.46722		0.00119	4.79585	-3.08e-06	4.79585	0.00118	4.79585
	0.00206	6.42486	-2.43209e-06	6.42486	0.00206	6.42486		0.00127	5.13892	-1.75e-06	5.13892	0.00127	5.13892		0.00158	6.05836	1.78497e-06	6.05836	0.00158	6.05836		0.00126	5.99315	4.27e-07	5.99315	0.00126	5.99315			0.00169	6.4679	-0.000236	6.4679	0.000371	6.4679		0.00124	4.45367	-0.000147	4.45367	0.000946	4.45367		0.00118	4.83451	-3.19e-06	4.83451	0.00117	4.83451
	0.00205	6.41801	-2.94549e-06	6.41801	0.00204	6.41801		0.00129	5.19021	-1.83673e-06	5.19021	0.00129	5.19021		0.00159	6.07732	2.21558e-06	6.07732	0.00159	6.07732		0.00127	6.0336	3.54e-07	6.0336	0.00127	6.0336			0.0017	6.54698	-0.00024	6.54698	0.000373	6.54698		0.00126	4.50975	-0.000149	4.50975	0.000961	4.50975		0.00119	4.85553	-2.68e-06	4.85553	0.00118	4.85553
	0.00208	6.4097	-3.33269e-06	6.4097	0.00207	6.4097		0.00128	5.24283	-1.85204e-06	5.24283	0.00128	5.24283		0.0016	6.12273	-1.07222e-08	6.12273	0.0016	6.12273		0.00127	6.0744	6.43e-07	6.0744	0.00127	6.0744			0.00172	6.55037	-0.000241	6.55037	0.000378	6.55037		0.00126	4.55124	-0.000152	4.55124	0.000957	4.55124		0.0012	4.89099	-3.19e-06	4.89099	0.00119	4.89099
	0.00208	6.52567	-2.87134e-06	6.52567	0.00207	6.52567		0.0013	5.27486	-1.91837e-06	5.27486	0.0013	5.27486		0.00159	6.15314	1.73463e-06	6.15314	0.00159	6.15314		0.00129	6.11659	7.18e-07	6.11659	0.00129	6.11659			0.00174	6.61283	-0.000244	6.61283	0.000383	6.61283		0.00127	4.55574	-0.000152	4.55574	0.000966	4.55574		0.00121	4.96103	-3.27e-06	4.96103	0.0012	4.96103
	0.0021	6.52165	-3.04566e-06	6.52165	0.00209	6.52165		0.0013	5.2768	-1.55612e-06	5.2768	0.0013	5.2768		0.00164	6.16047	3.00778e-07	6.16047	0.00164	6.16047		0.00129	6.12702	7.9e-07	6.12702	0.00129	6.12702			0.00173	6.68426	-0.000247	6.68426	0.000374	6.68426		0.00128	4.59225	-0.000154	4.59225	0.000972	4.59225		0.00122	5.01244	-3.17e-06	5.01244	0.00121	5.01244
	0.00218	6.61956	-3.06084e-06	6.61956	0.00217	6.61956		0.00131	5.2773	-1.59184e-06	5.2773	0.00131	5.2773		0.00164	6.27023	-9.98194e-08	6.27023	0.00164	6.27023		0.00131	6.21823	8.54e-08	6.21823	0.00131	6.21823			0.00174	6.72076	-0.00025	6.72076	0.000377	6.72076		0.00128	4.58946	-0.000155	4.58946	0.000969	4.58946		0.00123	5.01403	-2.89e-06	5.01403	0.00122	5.01403
	0.00216	6.66031	-2.91699e-06	6.66031	0.00215	6.66031		0.00134	5.32399	-1.73469e-06	5.32399	0.00134	5.32399		0.00165	6.30924	5.02403e-07	6.30924	0.00165	6.30924		0.00131	6.24201	3.25e-07	6.24201	0.00131	6.24201			0.00176	6.80109	-0.000253	6.80109	0.000378	6.80109		0.00129	4.61083	-0.000157	4.61083	0.000976	4.61083		0.00123	5.04832	-3.18e-06	5.04832	0.00122	5.04832
	0.00218	6.65203	-2.78529e-06	6.65203	0.00217	6.65203		0.00134	5.4488	-1.77041e-06	5.4488	0.00134	5.4488		0.00165	6.34866	1.25907e-06	6.34866	0.00165	6.34866		0.00133	6.27886	4.89e-07	6.27886	0.00133	6.27886			0.0018	6.80661	-0.000255	6.80661	0.000391	6.80661		0.00131	4.66807	-0.000158	4.66807	0.000993	4.66807		0.00126	5.04982	-2.75e-06	5.04982	0.00125	5.04982
	0.00221	6.78235	-2.46256e-06	6.78235	0.00221	6.78235		0.00136	5.46833	-1.79592e-06	5.46833	0.00136	5.46833		0.00166	6.38539	1.69396e-06	6.38539	0.00166	6.38539		0.00133	6.30758	8.12e-08	6.30758	0.00133	6.30758			0.00179	6.93286	-0.000258	6.93286	0.000383	6.93286		0.00132	4.67208	-0.00016	4.67208	0.001	4.67208		0.00126	5.07076	-3.65e-06	5.07076	0.00125	5.07076
	0.00222	6.81378	-2.37292e-06	6.81378	0.00222	6.81378		0.00135	5.39701	-1.85714e-06	5.39701	0.00135	5.39701		0.00169	6.44252	9e-08	6.44252	0.00169	6.44252		0.00135	6.32329	2.07e-07	6.32329	0.00135	6.32329			0.00181	6.98857	-0.000261	6.98857	0.000391	6.98857		0.00133	4.68577	-0.000161	4.68577	0.00101	4.68577		0.00126	5.11979	-3.09e-06	5.11979	0.00125	5.11979
	0.00222	6.87649	-3.37761e-06	6.87649	0.00221	6.87649		0.00136	5.44049	-1.30102e-06	5.44049	0.00136	5.44049		0.00169	6.45374	1.35201e-06	6.45374	0.00169	6.45374		0.00136	6.39669	6.71e-07	6.39669	0.00136	6.39669			0.00183	6.93245	-0.000262	6.93245	0.000394	6.93245		0.00135	4.75742	-0.000164	4.75742	0.00102	4.75742		0.00127	5.1312	-3.53e-06	5.1312	0.00126	5.1312
	0.00227	6.94843	-2.49932e-06	6.94843	0.00227	6.94843		0.00138	5.43765	-1.84694e-06	5.43765	0.00138	5.43765		0.0017	6.51189	3.27306e-07	6.51189	0.0017	6.51189		0.00136	6.41961	7.04e-07	6.41961	0.00136	6.41961			0.00184	7.03316	-0.000265	7.03316	0.000396	7.03316		0.00135	4.77008	-0.000165	4.77008	0.00102	4.77008		0.00128	5.19405	-3.3e-06	5.19405	0.00127	5.19405
	0.00226	6.92694	-2.93609e-06	6.92694	0.00225	6.92694		0.00139	5.4868	-2.0102e-06	5.4868	0.00139	5.4868		0.00171	6.55388	1.03964e-06	6.55388	0.00171	6.55388		0.00138	6.47834	2.99e-07	6.47834	0.00138	6.47834			0.00184	7.03779	-0.000266	7.03779	0.000392	7.03779		0.00135	4.78986	-0.000167	4.78986	0.00102	4.78986		0.00129	5.21208	-3.43e-06	5.21208	0.00128	5.21208
	0.00226	6.92902	-2.91131e-06	6.92902	0.00225	6.92902		0.00139	5.58881	-2.43367e-06	5.58881	0.00139	5.58881		0.00173	6.58685	1.54368e-06	6.58685	0.00173	6.58685		0.00137	6.48477	3.23e-07	6.48477	0.00137	6.48477			0.00185	7.11408	-0.00027	7.11408	0.000397	7.11408		0.00136	4.81231	-0.000169	4.81231	0.00102	4.81231		0.0013	5.21332	-3.27e-06	5.21332	0.00129	5.21332
	0.00229	6.9096	-3.01127e-06	6.9096	0.00228	6.9096		0.00142	5.63323	-2.02551e-06	5.63323	0.00142	5.63323		0.00175	6.58958	8.49167e-08	6.58958	0.00175	6.58958		0.00138	6.52594	4.01e-07	6.52594	0.00138	6.52594			0.00188	7.13528	-0.000272	7.13528	0.000402	7.13528		0.00138	4.83331	-0.000171	4.83331	0.00104	4.83331		0.0013	5.25794	-3.64e-06	5.25794	0.00129	5.25794
	0.00232	6.97512	-2.51873e-06	6.97512	0.00231	6.97512		0.00141	5.6505	-2e-06	5.6505	0.00141	5.6505		0.00175	6.63145	-2.65556e-08	6.63145	0.00175	6.63145		0.0014	6.53553	4.82e-07	6.53553	0.0014	6.53553			0.00188	7.14476	-0.000274	7.14476	0.000402	7.14476		0.00138	4.89093	-0.000173	4.89093	0.00103	4.89093		0.0013	5.28295	-3.52e-06	5.28295	0.00129	5.28295
	0.00234	6.99555	-2.46607e-06	6.99555	0.00234	6.99555		0.00141	5.65018	-2.02041e-06	5.65018	0.00141	5.65018		0.00176	6.68599	-7.99417e-07	6.68599	0.00176	6.68599		0.00141	6.57692	9.73e-08	6.57692	0.00141	6.57692			0.00191	7.25832	-0.000277	7.25832	0.00041	7.25832		0.0014	4.89149	-0.000174	4.89149	0.00105	4.89149		0.00132	5.27515	-3.49e-06	5.27515	0.00131	5.27515
	0.00235	7.01121	-3.1159e-06	7.01121	0.00234	7.01121		0.00143	5.68792	-1.91837e-06	5.68792	0.00143	5.68792		0.0018	6.74194	2.25701e-06	6.74194	0.0018	6.74194		0.00141	6.65048	4.07e-07	6.65048	0.00141	6.65048			0.00191	7.29561	-0.000279	7.29561	0.000403	7.29561		0.00141	4.92809	-0.000175	4.92809	0.00106	4.92809		0.00135	5.36059	-3.19e-06	5.36059	0.00134	5.36059
	0.00238	7.03584	-3.18416e-06	7.03584	0.00237	7.03584		0.00145	5.69256	-2.02551e-06	5.69256	0.00145	5.69256		0.00179	6.7554	-1.86569e-07	6.7554	0.00179	6.7554		0.00142	6.68624	6.96e-07	6.68624	0.00142	6.68624			0.00194	7.35931	-0.000284	7.35931	0.000411	7.35931		0.00142	4.94687	-0.000177	4.94687	0.00107	4.94687		0.00135	5.41786	-3.93e-06	5.41786	0.00134	5.41786
	0.00238	7.15767	-3.13078e-06	7.15767	0.00237	7.15767		0.00146	5.68806	-2.20408e-06	5.68806	0.00146	5.68806		0.0018	6.7917	5.10694e-08	6.7917	0.0018	6.7917		0.00144	6.74437	4.33e-07	6.74437	0.00144	6.74437			0.00194	7.43982	-0.000287	7.43982	0.000403	7.43982		0.00142	4.95279	-0.000179	4.95279	0.00106	4.95279		0.00135	5.48092	-3.59e-06	5.48092	0.00134	5.48092
	0.00238	7.13916	-2.77961e-06	7.13916	0.00237	7.13916		0.00147	5.76826	-2.18367e-06	5.76826	0.00147	5.76826		0.00181	6.83404	6.30236e-07	6.83404	0.00181	6.83404		0.00145	6.80887	6.73e-07	6.80887	0.00145	6.80887			0.00195	7.45312	-0.00029	7.45312	0.000408	7.45312		0.00144	4.94037	-0.000179	4.94037	0.00108	4.94037		0.00136	5.47134	-3.41e-06	5.47134	0.00135	5.47134
	0.0024	7.212	-2.18856e-06	7.212	0.0024	7.212		0.00149	5.74815	-2.21939e-06	5.74815	0.00149	5.74815		0.00183	6.85945	5.64056e-07	6.85945	0.00183	6.85945		0.00146	6.80034	3.1e-07	6.80034	0.00146	6.80034			0.00195	7.47521	-0.000292	7.47521	0.000404	7.47521		0.00144	5.01225	-0.000182	5.01225	0.00108	5.01225		0.00137	5.51733	-3.36e-06	5.51733	0.00136	5.51733
	0.0024	7.22695	-2.73314e-06	7.22695	0.00239	7.22695		0.00149	5.78517	-2.33163e-06	5.78517	0.00149	5.78517		0.00184	6.87739	2.49986e-07	6.87739	0.00184	6.87739		0.00146	6.89211	4.79e-07	6.89211	0.00146	6.89211			0.00198	7.56678	-0.000296	7.56678	0.000406	7.56678		0.00145	5.02062	-0.000184	5.02062	0.00108	5.02062		0.00138	5.5555	-3.39e-06	5.5555	0.00137	5.5555
	0.00243	7.22162	-2.70846e-06	7.22162	0.00242	7.22162		0.00149	5.78628	-2.38265e-06	5.78628	0.00149	5.78628		0.00185	6.92424	4.54639e-07	6.92424	0.00185	6.92424		0.00148	6.88828	6.49e-07	6.88828	0.00148	6.88828			0.00199	7.61208	-0.000298	7.61208	0.000413	7.61208		0.00147	5.06888	-0.000186	5.06888	0.0011	5.06888		0.00139	5.58365	-3.66e-06	5.58365	0.00138	5.58365
	0.00245	7.28657	-2.39636e-06	7.28657	0.00245	7.28657		0.0015	5.88435	-2.33163e-06	5.88435	0.0015	5.88435		0.00188	6.93488	4.29306e-08	6.93488	0.00188	6.93488		0.0015	6.93432	-9.57e-08	6.93432	0.0015	6.93432			0.00201	7.64762	-0.000301	7.64762	0.000413	7.64762		0.00148	5.11274	-0.000189	5.11274	0.0011	5.11274		0.00141	5.59937	-3.85e-06	5.59937	0.0014	5.59937
	0.00246	7.30587	-3.31335e-06	7.30587	0.00245	7.30587		0.0015	5.8345	-2.60204e-06	5.8345	0.00149	5.8345		0.00188	6.98297	4.77361e-08	6.98297	0.00188	6.98297		0.0015	6.9991	1.22e-07	6.9991	0.0015	6.9991			0.00203	7.66261	-0.000302	7.66261	0.000424	7.66261		0.00148	5.12188	-0.000191	5.12188	0.0011	5.12188		0.00141	5.62871	-3.84e-06	5.62871	0.0014	5.62871
	0.0025	7.3089	-2.65993e-06	7.3089	0.00249	7.3089		0.00152	5.83672	-2.60204e-06	5.83672	0.00151	5.83672		0.0019	7.00624	-1.88528e-07	7.00624	0.0019	7.00624		0.00152	7.04461	1.05e-07	7.04461	0.00152	7.04461			0.00202	7.69307	-0.000305	7.69307	0.000414	7.69307		0.0015	5.13326	-0.000193	5.13326	0.00111	5.13326		0.00141	5.71623	-3.42e-06	5.71623	0.0014	5.71623
	0.00248	7.41349	-2.33262e-06	7.41349	0.00248	7.41349		0.00153	5.8992	-2.72449e-06	5.8992	0.00152	5.8992		0.00191	7.04261	6.9375e-07	7.04261	0.00191	7.04261		0.00151	7.03855	7.39e-07	7.03855	0.00151	7.03855			0.00205	7.75268	-0.000308	7.75268	0.000418	7.75268		0.0015	5.18343	-0.000195	5.18343	0.00111	5.18343		0.00141	5.70704	-3.85e-06	5.70704	0.0014	5.70704
	0.0025	7.43526	-1.88514e-06	7.43526	0.0025	7.43526		0.00154	5.93604	-2.62755e-06	5.93604	0.00153	5.93604		0.0019	7.06857	1.36236e-07	7.06857	0.0019	7.06857		0.00153	7.07532	3.4e-07	7.07532	0.00153	7.07532			0.00207	7.80342	-0.000311	7.80342	0.000427	7.80342		0.00151	5.22645	-0.000198	5.22645	0.00111	5.22645		0.00142	5.77001	-3.81e-06	5.77001	0.00141	5.77001
	0.00253	7.50508	-2.45161e-06	7.50508	0.00253	7.50508		0.00156	5.96787	-2.67857e-06	5.96787	0.00155	5.96787		0.00193	7.08528	1.26738e-06	7.08528	0.00193	7.08528		0.00154	7.12232	6.61e-07	7.12232	0.00154	7.12232			0.00206	7.79785	-0.000312	7.79785	0.000419	7.79785		0.00152	5.23406	-0.000202	5.23406	0.00112	5.23406		0.00144	5.7856	-3.72e-06	5.7856	0.00143	5.7856
	0.00254	7.53629	-2.13486e-06	7.53629	0.00254	7.53629		0.00155	5.96536	-2.5102e-06	5.96536	0.00154	5.96536		0.00195	7.15364	6.72389e-07	7.15364	0.00195	7.15364		0.00154	7.15742	1.58e-07	7.15742	0.00154	7.15742			0.0021	7.83875	-0.000314	7.83875	0.000433	7.83875		0.00153	5.27675	-0.000204	5.27675	0.00112	5.27675		0.00145	5.8407	-3.54e-06	5.8407	0.00144	5.8407
	0.00254	7.51514	-2.46524e-06	7.51514	0.00254	7.51514		0.00156	5.99135	-2.80612e-06	5.99135	0.00155	5.99135		0.00195	7.20632	2.38792e-07	7.20632	0.00195	7.20632		0.00155	7.1966	4.34e-07	7.1966	0.00155	7.1966			0.00209	7.89768	-0.000316	7.89768	0.000428	7.89768		0.00154	5.32476	-0.000207	5.32476	0.00113	5.32476		0.00146	5.83314	-3.13e-06	5.83314	0.00145	5.83314
	0.00258	7.49001	-2.2752e-06	7.49001	0.00258	7.49001		0.00158	5.953	-2.5102e-06	5.953	0.00157	5.953		0.00196	7.27468	1.31067e-06	7.27468	0.00196	7.27468		0.00157	7.23577	5.72e-07	7.23577	0.00157	7.23577			0.0021	7.93198	-0.000318	7.93198	0.000425	7.93198		0.00156	5.3563	-0.000209	5.3563	0.00114	5.3563		0.00147	5.89239	-3.9e-06	5.89239	0.00146	5.89239
	0.00259	7.52174	-1.83182e-06	7.52174	0.00259	7.52174		0.00159	6.03961	-2.79082e-06	6.03961	0.00158	6.03961		0.00196	7.28324	6.11361e-07	7.28324	0.00196	7.28324		0.00158	7.30645	3.04e-07	7.30645	0.00158	7.30645			0.00213	8.02666	-0.000322	8.02666	0.000437	8.02666		0.00156	5.36334	-0.000211	5.36334	0.00114	5.36334		0.00148	5.90538	-3.34e-06	5.90538	0.00147	5.90538
	0.00258	7.59407	-2.45905e-06	7.59407	0.00258	7.59407		0.00159	6.04576	-2.69388e-06	6.04576	0.00158	6.04576		0.00199	7.28063	1.0786e-06	7.28063	0.00199	7.28063		0.00158	7.3195	5.27e-07	7.3195	0.00158	7.3195			0.00214	8.06105	-0.000324	8.06105	0.000435	8.06105		0.00157	5.37341	-0.000215	5.37341	0.00114	5.37341		0.00149	5.97565	-3.92e-06	5.97565	0.00148	5.97565
	0.00261	7.57026	-2.48238e-06	7.57026	0.00261	7.57026		0.00161	6.05956	-2.90816e-06	6.05956	0.0016	6.05956		0.002	7.37632	8.25431e-07	7.37632	0.002	7.37632		0.00159	7.35211	1.58e-07	7.35211	0.00159	7.35211			0.00217	8.07021	-0.000326	8.07021	0.000447	8.07021		0.00158	5.40346	-0.000216	5.40346	0.00115	5.40346		0.0015	5.99898	-3.68e-06	5.99898	0.00149	5.99898
	0.00264	7.57147	-2.26044e-06	7.57147	0.00264	7.57147		0.00162	6.10078	-3.02551e-06	6.10078	0.00161	6.10078		0.002	7.40315	2.2064e-06	7.40315	0.002	7.40315		0.0016	7.35954	2.3e-07	7.35954	0.0016	7.35954			0.00216	8.12902	-0.000329	8.12902	0.000438	8.12902		0.00159	5.39778	-0.000218	5.39778	0.00115	5.39778		0.00152	6.03777	-3.85e-06	6.03777	0.00151	6.03777
	0.00266	7.66032	-1.94565e-06	7.66032	0.00266	7.66032		0.00161	6.15063	-2.98469e-06	6.15063	0.0016	6.15063		0.00201	7.44802	7.05917e-07	7.44802	0.00201	7.44802		0.00161	7.4263	7.33e-07	7.4263	0.00161	7.4263			0.00217	8.19591	-0.000332	8.19591	0.000439	8.19591		0.0016	5.46417	-0.000221	5.46417	0.00116	5.46417		0.00151	6.07399	-3.96e-06	6.07399	0.0015	6.07399
	0.00266	7.7328	-1.99109e-06	7.7328	0.00266	7.7328		0.00163	6.15088	-3.40306e-06	6.15088	0.00162	6.15088		0.00205	7.50704	1.8496e-06	7.50704	0.00205	7.50704		0.00162	7.47081	-1.46e-07	7.47081	0.00162	7.47081			0.00218	8.19999	-0.000334	8.19999	0.000439	8.19999		0.00161	5.49362	-0.000223	5.49362	0.00116	5.49362		0.00152	6.10234	-3.91e-06	6.10234	0.00151	6.10234
	0.00269	7.75457	-2.29617e-06	7.75457	0.00269	7.75457		0.00165	6.17846	-3.38776e-06	6.17846	0.00164	6.17846		0.00204	7.51533	1.76176e-06	7.51533	0.00204	7.51533		0.00164	7.504	5.12e-07	7.504	0.00164	7.504			0.0022	8.28728	-0.000337	8.28728	0.000439	8.28728		0.00163	5.53591	-0.000225	5.53591	0.00118	5.53591		0.00153	6.13819	-3.66e-06	6.13819	0.00152	6.13819
	0.0027	7.72367	-1.77038e-06	7.72367	0.0027	7.72367		0.00166	6.12383	-3.44388e-06	6.12383	0.00165	6.12383		0.00207	7.54894	2.33364e-06	7.54894	0.00207	7.54894		0.00164	7.51215	4.55e-07	7.51215	0.00164	7.51215			0.00224	8.32096	-0.00034	8.32096	0.000454	8.32096		0.00161	5.54335	-0.000228	5.54335	0.00115	5.54335		0.00153	6.1326	-4.38e-06	6.1326	0.00152	6.1326
	0.00272	7.79583	-2.50676e-06	7.79583	0.00271	7.79583		0.00166	6.21666	-3.72449e-06	6.21666	0.00165	6.21666		0.00206	7.61081	7.00792e-07	7.61081	0.00206	7.61081		0.00164	7.56409	-1.75e-08	7.56409	0.00164	7.56409			0.00224	8.41973	-0.000344	8.41973	0.000448	8.41973		0.00162	5.58653	-0.000231	5.58653	0.00116	5.58653		0.00155	6.16386	-4.11e-06	6.16386	0.00154	6.16386
	0.00272	7.79237	-2.55953e-06	7.79237	0.00271	7.79237		0.00168	6.26316	-3.69898e-06	6.26316	0.00167	6.26316		0.00209	7.58928	8.05569e-07	7.58928	0.00209	7.58928		0.00167	7.57122	6.73e-07	7.57122	0.00167	7.57122			0.00223	8.45795	-0.000346	8.45795	0.000443	8.45795		0.00165	5.62589	-0.000233	5.62589	0.00118	5.62589		0.00155	6.20627	-3.91e-06	6.20627	0.00154	6.20627
	0.00274	7.7983	-1.77585e-06	7.7983	0.00274	7.7983		0.00169	6.27354	-3.84184e-06	6.27354	0.00168	6.27354		0.0021	7.63306	3.15203e-06	7.63306	0.00211	7.63306		0.00167	7.63016	4.13e-07	7.63016	0.00167	7.63016			0.00224	8.4943	-0.000349	8.4943	0.000445	8.4943		0.00167	5.62222	-0.000234	5.62222	0.0012	5.62222		0.00156	6.23424	-4.08e-06	6.23424	0.00155	6.23424
	0.00274	7.8774	-1.88421e-06	7.8774	0.00274	7.8774		0.0017	6.2812	-3.39796e-06	6.2812	0.00169	6.2812		0.0021	7.68872	1.13917e-06	7.68872	0.0021	7.68872		0.00169	7.65364	1.77e-07	7.65364	0.00169	7.65364			0.00228	8.52521	-0.00035	8.52521	0.000459	8.52521		0.00167	5.64067	-0.000236	5.64067	0.0012	5.64067		0.00158	6.28973	-4.25e-06	6.28973	0.00157	6.28973
	0.00278	7.9016	-2.81927e-06	7.9016	0.00277	7.9016		0.0017	6.30155	-3.61224e-06	6.30155	0.00169	6.30155		0.00211	7.70504	8.30417e-07	7.70504	0.00211	7.70504		0.00169	7.70638	3.55e-07	7.70638	0.00169	7.70638			0.00228	8.52076	-0.000352	8.52076	0.000455	8.52076		0.00167	5.67777	-0.000239	5.67777	0.00119	5.67777		0.00158	6.33411	-3.96e-06	6.33411	0.00157	6.33411
	0.0028	7.9224	-2.79211e-06	7.9224	0.00279	7.9224		0.00171	6.35392	-3.56633e-06	6.35392	0.0017	6.35392		0.00215	7.75059	1.20961e-06	7.75059	0.00215	7.75059		0.0017	7.74714	4.76e-07	7.74714	0.0017	7.74714			0.00227	8.57224	-0.000355	8.57224	0.000445	8.57224		0.00168	5.7277	-0.000241	5.7277	0.0012	5.7277		0.00159	6.3244	-4.01e-06	6.3244	0.00158	6.3244
	0.0028	8.02837	-2.95199e-06	8.02837	0.00279	8.02837		0.00171	6.40898	-3.88265e-06	6.40898	0.0017	6.40898		0.00215	7.76559	1.44063e-06	7.76559	0.00215	7.76559		0.0017	7.81066	3.35e-07	7.81066	0.0017	7.81066			0.00231	8.6345	-0.000358	8.6345	0.000461	8.6345		0.00169	5.76276	-0.000244	5.76276	0.0012	5.76276		0.00161	6.36761	-4.18e-06	6.36761	0.0016	6.36761
	0.00283	8.00324	-2.64619e-06	8.00324	0.00282	8.00324		0.00174	6.41182	-3.71939e-06	6.41182	0.00173	6.41182		0.00215	7.82888	1.01604e-06	7.82888	0.00215	7.82888		0.00173	7.83639	5.61e-07	7.83639	0.00173	7.83639			0.00232	8.68382	-0.000362	8.68382	0.000459	8.68382		0.00171	5.77529	-0.000246	5.77529	0.00122	5.77529		0.00162	6.388	-4.33e-06	6.388	0.00161	6.388
	0.00282	8.11548	-7.78951e-06	8.11548	0.0028	8.11548		0.00175	6.34639	-3.55102e-06	6.34639	0.00174	6.34639		0.00217	7.87543	1.7065e-06	7.87543	0.00217	7.87543		0.00173	7.84544	8.79e-08	7.84544	0.00173	7.84544			0.00235	8.77384	-0.000365	8.77384	0.000465	8.77384		0.0017	5.7942	-0.000249	5.7942	0.0012	5.7942		0.00162	6.43146	-3.73e-06	6.43146	0.00161	6.43146
	0.00285	8.07803	-2.00309e-05	8.07803	0.00281	8.07803		0.00175	6.42104	-4.05612e-06	6.42104	0.00174	6.42104		0.00217	7.91072	1.27613e-06	7.91072	0.00217	7.91072		0.00174	7.93958	4.03e-07	7.93958	0.00174	7.93958			0.00234	8.80465	-0.000367	8.80465	0.000457	8.80465		0.00172	5.83216	-0.000252	5.83216	0.00122	5.83216		0.00164	6.45173	-4.33e-06	6.45173	0.00163	6.45173
	0.00285	8.15947	-3.60607e-05	8.15947	0.00278	8.15947		0.00177	6.42991	-3.94388e-06	6.42991	0.00176	6.42991		0.0022	7.90978	2.32779e-06	7.90978	0.0022	7.90978		0.00175	7.99403	3.75e-07	7.99403	0.00175	7.99403			0.00235	8.90129	-0.000372	8.90129	0.000452	8.90129		0.00174	5.84814	-0.000255	5.84814	0.00123	5.84814		0.00163	6.49362	-4.4e-06	6.49362	0.00162	6.49362
	0.00285	8.07333	-5.31946e-05	8.07333	0.00274	8.07333		0.00176	6.53336	-3.90306e-06	6.53336	0.00175	6.53336		0.00221	7.95729	2.35e-06	7.95729	0.00221	7.95729		0.00177	8.015	4.32e-07	8.015	0.00177	8.015			0.00238	8.88957	-0.000374	8.88957	0.000465	8.88957		0.00174	5.8867	-0.000258	5.8867	0.00122	5.8867		0.00166	6.56404	-3.88e-06	6.56404	0.00165	6.56404
	0.00288	8.20357	-7.44316e-05	8.20357	0.00273	8.20357		0.00178	6.50988	-4.13265e-06	6.50988	0.00177	6.50988		0.0022	7.99154	2.5236e-06	7.99154	0.00221	7.99154		0.00178	8.03223	-2.16e-08	8.03223	0.00178	8.03223			0.00239	8.94025	-0.000376	8.94025	0.000463	8.94025		0.00175	5.91829	-0.000259	5.91829	0.00123	5.91829		0.00166	6.55328	-4.21e-06	6.55328	0.00165	6.55328
	0.0029	8.14215	-8.56152e-05	8.14215	0.00273	8.14215		0.00178	6.55292	-3.85204e-06	6.55292	0.00177	6.55292		0.00224	8.07291	1.45169e-06	8.07291	0.00224	8.07291		0.00178	8.07331	1.38e-07	8.07331	0.00178	8.07331			0.0024	8.96904	-0.000378	8.96904	0.000467	8.96904		0.00178	5.92713	-0.000261	5.92713	0.00126	5.92713		0.00167	6.62316	-4.31e-06	6.62316	0.00166	6.62316
	0.00293	8.16195	-0.000105462	8.16195	0.00272	8.16195		0.00178	6.50133	-4.14286e-06	6.50133	0.00177	6.50133		0.00222	8.09394	8.58653e-07	8.09394	0.00222	8.09394		0.00179	8.10753	3.17e-07	8.10753	0.00179	8.10753			0.00239	9.06133	-0.000382	9.06133	0.000456	9.06133		0.00177	5.95539	-0.000263	5.95539	0.00124	5.95539		0.00168	6.62857	-4.89e-06	6.62857	0.00167	6.62857
	0.00296	8.24527	-0.000115713	8.24527	0.00273	8.24527		0.0018	6.58221	-3.9949e-06	6.58221	0.00179	6.58221		0.00225	8.1599	1.36925e-06	8.1599	0.00225	8.1599		0.00178	8.13238	8.97e-08	8.13238	0.00178	8.13238			0.00245	9.12087	-0.000384	9.12087	0.000477	9.12087		0.00178	5.96095	-0.000265	5.96095	0.00125	5.96095		0.00168	6.66314	-4.7e-06	6.66314	0.00167	6.66314
	0.00296	8.24282	-0.000133915	8.24282	0.00269	8.24282		0.00181	6.49593	-4.06633e-06	6.49593	0.0018	6.49593		0.00226	8.204	1.24168e-06	8.204	0.00226	8.204		0.00181	8.17262	2.07e-07	8.17262	0.00181	8.17262			0.00246	9.16884	-0.000386	9.16884	0.000479	9.16884		0.00178	5.99172	-0.000268	5.99172	0.00124	5.99172		0.00169	6.67664	-4.51e-06	6.67664	0.00168	6.67664
	0.00296	8.28264	-0.000146452	8.28264	0.00267	8.28264		0.00183	6.6076	-4.45918e-06	6.6076	0.00182	6.6076		0.00227	8.22344	1.56639e-06	8.22344	0.00227	8.22344		0.00181	8.21728	2.37e-07	8.21728	0.00181	8.21728			0.00245	9.2453	-0.00039	9.2453	0.000469	9.2453		0.00181	6.03334	-0.00027	6.03334	0.00127	6.03334		0.0017	6.70017	-4.26e-06	6.70017	0.00169	6.70017
	0.00298	8.36967	-0.000168015	8.36967	0.00264	8.36967		0.00185	6.59548	-4.17857e-06	6.59548	0.00184	6.59548		0.00229	8.24406	2.11644e-06	8.24406	0.00229	8.24406		0.00182	8.22998	-1.49e-07	8.22998	0.00182	8.22998			0.00247	9.22953	-0.000392	9.22953	0.000475	9.22953		0.00181	6.06843	-0.000274	6.06843	0.00126	6.06843		0.0017	6.7748	-4.57e-06	6.7748	0.00169	6.7748
	0.00301	8.31266	-0.00018402	8.31266	0.00264	8.31266		0.00185	6.56626	-4.14286e-06	6.56626	0.00184	6.56626		0.0023	8.27095	1.44436e-06	8.27095	0.0023	8.27095		0.00183	8.23699	-3.24e-07	8.23699	0.00183	8.23699			0.00247	9.29676	-0.000395	9.29676	0.000473	9.29676		0.00182	6.04135	-0.000276	6.04135	0.00127	6.04135		0.00172	6.78352	-4.39e-06	6.78352	0.00171	6.78352
	0.00301	8.37828	-0.000199466	8.37828	0.00261	8.37828		0.00185	6.62841	-3.9949e-06	6.62841	0.00184	6.62841		0.00231	8.2839	1.87019e-06	8.2839	0.00231	8.2839		0.00184	8.29826	1.6e-07	8.29826	0.00184	8.29826			0.00247	9.30226	-0.000397	9.30226	0.000467	9.30226		0.00183	6.0925	-0.000279	6.0925	0.00127	6.0925		0.00173	6.81029	-4.82e-06	6.81029	0.00172	6.81029
	0.00302	8.41359	-0.000218373	8.41359	0.00258	8.41359		0.00186	6.6538	-4.30612e-06	6.6538	0.00185	6.6538		0.00231	8.33495	2.65497e-06	8.33495	0.00232	8.33495		0.00186	8.35409	4e-07	8.35409	0.00186	8.35409			0.00249	9.36054	-0.0004	9.36054	0.000472	9.36054		0.00184	6.13089	-0.000281	6.13089	0.00128	6.13089		0.00174	6.85602	-4.52e-06	6.85602	0.00173	6.85602
	0.00306	8.36795	-0.000238856	8.36795	0.00258	8.36795		0.00188	6.6578	-4.58163e-06	6.6578	0.00187	6.6578		0.00232	8.38243	2.32144e-06	8.38243	0.00232	8.38243		0.00186	8.34881	4.34e-07	8.34881	0.00186	8.34881			0.00253	9.39522	-0.000403	9.39522	0.000487	9.39522		0.00185	6.14855	-0.000283	6.14855	0.00128	6.14855		0.00176	6.89093	-4.44e-06	6.89093	0.00175	6.89093
	0.00309	8.38964	-0.000254962	8.38964	0.00258	8.38964		0.00188	6.69896	-4.46939e-06	6.69896	0.00187	6.69896		0.00235	8.42423	2.95911e-06	8.42423	0.00236	8.42423		0.00188	8.41199	3.39e-07	8.41199	0.00188	8.41199			0.00253	9.48204	-0.000405	9.48204	0.000482	9.48204		0.00186	6.18889	-0.000286	6.18889	0.00129	6.18889		0.00176	6.90631	-4.51e-06	6.90631	0.00175	6.90631
	0.00309	8.4345	-0.000274833	8.4345	0.00254	8.4345		0.00189	6.67981	-4.61224e-06	6.67981	0.00188	6.67981		0.00236	8.45869	2.46806e-06	8.45869	0.00236	8.45869		0.00189	8.46217	4.51e-08	8.46217	0.00189	8.46217			0.00254	9.57195	-0.000409	9.57195	0.000483	9.57195		0.00186	6.22424	-0.000288	6.22424	0.00128	6.22424		0.00177	6.92993	-4.49e-06	6.92993	0.00176	6.92993
	0.0031	8.4827	-0.000296246	8.4827	0.00251	8.4827		0.00191	6.71925	-4.69898e-06	6.71925	0.0019	6.71925		0.00237	8.50956	2.36088e-06	8.50956	0.00237	8.50956		0.00189	8.49501	3.31e-07	8.49501	0.00189	8.49501			0.00257	9.54519	-0.000411	9.54519	0.000491	9.54519		0.00187	6.29859	-0.000292	6.29859	0.00129	6.29859		0.00177	6.9554	-4.44e-06	6.9554	0.00176	6.9554
	0.00312	8.47357	-0.000313634	8.47357	0.00249	8.47357		0.00193	6.69935	-4.18367e-06	6.69935	0.00192	6.69935		0.00238	8.49381	1.63794e-06	8.49381	0.00238	8.49381		0.00191	8.51672	1.82e-07	8.51672	0.00191	8.51672			0.00258	9.56571	-0.000413	9.56571	0.000492	9.56571		0.00187	6.27606	-0.000294	6.27606	0.00128	6.27606		0.00179	6.98748	-4.97e-06	6.98748	0.00178	6.98748
	0.00312	8.5567	-0.000331389	8.5567	0.00246	8.5567		0.00193	6.73474	-4.71939e-06	6.73474	0.00192	6.73474		0.0024	8.53239	1.9951e-06	8.53239	0.0024	8.53239		0.00192	8.54623	1e-07	8.54623	0.00192	8.54623			0.00258	9.61052	-0.000415	9.61052	0.000493	9.61052		0.0019	6.31813	-0.000298	6.31813	0.0013	6.31813		0.00179	7.08879	-4.43e-06	7.08879	0.00178	7.08879
	0.00317	8.55592	-0.000352508	8.55592	0.00246	8.55592		0.00194	6.77041	-4.68367e-06	6.77041	0.00193	6.77041		0.00241	8.56649	1.42735e-06	8.56649	0.00241	8.56649		0.00191	8.59339	5.4e-07	8.59339	0.00191	8.59339			0.0026	9.65803	-0.000418	9.65803	0.000491	9.65803		0.00191	6.34075	-0.000299	6.34075	0.00131	6.34075		0.00181	7.06682	-4.31e-06	7.06682	0.0018	7.06682
	0.00315	8.54404	-0.000373883	8.54404	0.0024	8.54404		0.00195	6.79034	-4.48469e-06	6.79034	0.00194	6.79034		0.00241	8.59992	2.90861e-06	8.59992	0.00242	8.59992		0.00193	8.59633	-1.83e-07	8.59633	0.00193	8.59633			0.00261	9.69521	-0.000422	9.69521	0.000493	9.69521		0.00191	6.31598	-0.000298	6.31598	0.00131	6.31598		0.00182	7.15251	-4.25e-06	7.15251	0.00181	7.15251
	0.00318	8.60075	-0.000394491	8.60075	0.00239	8.60075		0.00195	6.76637	-4.72449e-06	6.76637	0.00194	6.76637		0.00243	8.63044	1.43269e-06	8.63044	0.00243	8.63044		0.00194	8.64618	3.88e-08	8.64618	0.00194	8.64618			0.00264	9.80686	-0.000425	9.80686	0.000498	9.80686		0.00193	6.3167	-0.0003	6.3167	0.00133	6.3167		0.00181	7.18719	-4.88e-06	7.18719	0.0018	7.18719
	0.00318	8.60121	-0.00041905	8.60121	0.00234	8.60121		0.00198	6.7908	-4.7449e-06	6.7908	0.00197	6.7908		0.00246	8.6351	3.29239e-06	8.6351	0.00247	8.6351		0.00195	8.68542	3.59e-07	8.68542	0.00195	8.68542			0.00265	9.85349	-0.000428	9.85349	0.000502	9.85349		0.00194	6.31004	-0.000301	6.31004	0.00134	6.31004		0.00183	7.20492	-4.12e-06	7.20492	0.00182	7.20492
	0.00318	8.64244	-0.000441097	8.64244	0.0023	8.64244		0.00197	6.79756	-4.51531e-06	6.79756	0.00196	6.79756		0.00246	8.67731	1.26736e-06	8.67731	0.00246	8.67731		0.00196	8.7187	5.76e-07	8.7187	0.00196	8.7187			0.00265	9.91416	-0.000432	9.91416	0.000493	9.91416		0.00194	6.34576	-0.000303	6.34576	0.00133	6.34576		0.00183	7.1988	-4.39e-06	7.1988	0.00182	7.1988
	0.0032	8.70695	-0.000458636	8.70695	0.00228	8.70695		0.00199	6.88331	-4.62245e-06	6.88331	0.00198	6.88331		0.00246	8.72913	2.83844e-06	8.72913	0.00247	8.72913		0.00197	8.76546	8.39e-08	8.76546	0.00197	8.76546			0.00267	9.94116	-0.000434	9.94116	0.000499	9.94116		0.00194	6.37015	-0.000305	6.37015	0.00133	6.37015		0.00186	7.24783	-4.48e-06	7.24783	0.00185	7.24783
	0.00325	8.74166	-0.000479252	8.74166	0.00229	8.74166		0.00199	6.90203	-4.88776e-06	6.90203	0.00198	6.90203		0.00247	8.76369	2.43586e-06	8.76369	0.00247	8.76369		0.00198	8.81466	2.82e-07	8.81466	0.00198	8.81466			0.00268	9.98042	-0.000437	9.98042	0.000501	9.98042		0.00196	6.38652	-0.000306	6.38652	0.00135	6.38652		0.00185	7.29697	-4.32e-06	7.29697	0.00184	7.29697
	0.00325	8.7134	-0.000500129	8.7134	0.00225	8.7134		0.00199	6.89599	-4.5102e-06	6.89599	0.00198	6.89599		0.00248	8.79125	2.0875e-06	8.79125	0.00248	8.79125		0.00199	8.85179	4.3e-07	8.85179	0.00199	8.85179			0.00271	10.0092	-0.000439	10.0092	0.000511	10.0092		0.00197	6.40782	-0.000309	6.40782	0.00135	6.40782		0.00187	7.35438	-4.67e-06	7.35438	0.00186	7.35438
	0.00326	8.74181	-0.000522904	8.74181	0.00221	8.74181		0.002	6.9198	-5.08673e-06	6.9198	0.00199	6.9198		0.0025	8.89617	2.13976e-06	8.89617	0.0025	8.89617		0.002	8.90507	-9.17e-08	8.90507	0.002	8.90507			0.00271	10.044	-0.000442	10.044	0.000506	10.044		0.00197	6.4856	-0.000311	6.4856	0.00135	6.4856		0.00188	7.41205	-4.19e-06	7.41205	0.00187	7.41205
	0.0033	8.73451	-0.000543936	8.73451	0.00221	8.73451		0.00203	6.95005	-4.7449e-06	6.95005	0.00202	6.95005		0.00251	8.94187	1.26822e-06	8.94187	0.00251	8.94187		0.00201	8.93985	4.71e-07	8.93985	0.00201	8.93985			0.00272	10.1819	-0.000446	10.1819	0.000502	10.1819		0.00199	6.53634	-0.000314	6.53634	0.00136	6.53634		0.00189	7.46305	-4.6e-06	7.46305	0.00188	7.46305
	0.0033	8.82111	-0.00056912	8.82111	0.00216	8.82111		0.00203	6.96471	-5.02551e-06	6.96471	0.00202	6.96471		0.00253	8.96198	1.49807e-06	8.96198	0.00253	8.96198		0.00201	8.91822	2.79e-07	8.91822	0.00201	8.91822			0.00273	10.2292	-0.00045	10.2292	0.000502	10.2292		0.00199	6.54974	-0.000315	6.54974	0.00136	6.54974		0.0019	7.49437	-4.61e-06	7.49437	0.00189	7.49437
	0.00333	8.79865	-0.00058762	8.79865	0.00215	8.79865		0.00204	6.97535	-4.78571e-06	6.97535	0.00203	6.97535		0.00255	8.98035	1.19854e-06	8.98035	0.00255	8.98035		0.00203	8.97916	1.19e-07	8.97916	0.00203	8.97916			0.00275	10.1777	-0.00045	10.1777	0.000509	10.1777		0.002	6.54999	-0.000318	6.54999	0.00136	6.54999		0.00191	7.50435	-4.91e-06	7.50435	0.0019	7.50435
	0.0033	8.82745	-0.000611362	8.82745	0.00208	8.82745		0.00206	6.958	-4.91837e-06	6.958	0.00205	6.958		0.00257	8.9776	9.12569e-07	8.9776	0.00257	8.9776		0.00203	9.02177	3.32e-08	9.02177	0.00203	9.02177			0.00275	10.2836	-0.000454	10.2836	0.000504	10.2836		0.00201	6.58287	-0.00032	6.58287	0.00137	6.58287		0.00191	7.53235	-5.08e-06	7.53235	0.0019	7.53235
	0.00334	8.87372	-0.000629081	8.87372	0.00208	8.87372		0.00206	7.0269	-4.73469e-06	7.0269	0.00205	7.0269		0.00256	9.02155	2.40135e-06	9.02155	0.00256	9.02155		0.00205	9.01396	3.6e-07	9.01396	0.00205	9.01396			0.00278	10.3247	-0.000457	10.3247	0.000509	10.3247		0.00202	6.59671	-0.000322	6.59671	0.00138	6.59671		0.00192	7.59606	-5.5e-06	7.59606	0.00191	7.59606
	0.00336	8.85318	-0.000652641	8.85318	0.00205	8.85318		0.00208	7.00082	-4.9898e-06	7.00082	0.00207	7.00082		0.00258	9.05744	1.84924e-06	9.05744	0.00258	9.05744		0.00205	9.06749	3.26e-07	9.06749	0.00205	9.06749			0.00279	10.3824	-0.00046	10.3824	0.000513	10.3824		0.00204	6.67055	-0.000325	6.67055	0.00139	6.67055		0.00194	7.66966	-4.93e-06	7.66966	0.00193	7.66966
	0.00336	8.91921	-0.000672902	8.91921	0.00201	8.91921		0.00206	7.06149	-4.91837e-06	7.06149	0.00205	7.06149		0.00258	9.10611	2.43822e-06	9.10611	0.00258	9.10611		0.00207	9.12037	2.02e-07	9.12037	0.00207	9.12037			0.0028	10.4573	-0.000463	10.4573	0.000514	10.4573		0.00205	6.686	-0.000328	6.686	0.00139	6.686		0.00195	7.6549	-5.19e-06	7.6549	0.00194	7.6549
	0.00336	8.9846	-0.000697024	8.9846	0.00197	8.9846		0.00209	7.04904	-4.81122e-06	7.04904	0.00208	7.04904		0.0026	9.15365	4.64e-07	9.15365	0.0026	9.15365		0.00208	9.12897	1.85e-07	9.12897	0.00208	9.12897			0.00282	10.4991	-0.000466	10.4991	0.000514	10.4991		0.00206	6.72593	-0.000331	6.72593	0.0014	6.72593		0.00196	7.67918	-4.56e-06	7.67918	0.00195	7.67918
	0.00341	9.01171	-0.000722434	9.01171	0.00197	9.01171		0.0021	7.06463	-4.46429e-06	7.06463	0.00209	7.06463		0.00261	9.15993	1.73594e-06	9.15993	0.00261	9.15993		0.00209	9.17804	-7.61e-08	9.17804	0.00209	9.17804			0.00282	10.5064	-0.000468	10.5064	0.000515	10.5064		0.00206	6.74034	-0.000334	6.74034	0.00139	6.74034		0.00197	7.68517	-4.87e-06	7.68517	0.00196	7.68517
	0.00342	9.06903	-0.000741502	9.06903	0.00194	9.06903		0.0021	7.12068	-4.68878e-06	7.12068	0.00209	7.12068		0.00262	9.22744	-9.22639e-08	9.22744	0.00262	9.22744		0.0021	9.21822	-2.86e-07	9.21822	0.0021	9.21822			0.00284	10.5246	-0.000471	10.5246	0.00052	10.5246		0.00207	6.77257	-0.000337	6.77257	0.0014	6.77257		0.00197	7.73804	-4.77e-06	7.73804	0.00196	7.73804
	0.00347	9.04616	-0.000763196	9.04616	0.00194	9.04616		0.0021	7.13997	-4.5102e-06	7.13997	0.00209	7.13997		0.00263	9.23553	-2.32403e-07	9.23553	0.00263	9.23553		0.00211	9.25962	-2.73e-07	9.25962	0.00211	9.25962			0.00284	10.5669	-0.000473	10.5669	0.000517	10.5669		0.00209	6.78923	-0.00034	6.78923	0.00141	6.78923		0.00198	7.76469	-5.04e-06	7.76469	0.00197	7.76469
	0.00346	9.13083	-0.000786921	9.13083	0.00189	9.13083		0.00213	7.1969	-4.57143e-06	7.1969	0.00212	7.1969		0.00265	9.31417	-7.41317e-06	9.31417	0.00264	9.31417		0.00212	9.26427	-2.96e-07	9.26427	0.00212	9.26427			0.00284	10.6126	-0.000476	10.6126	0.000511	10.6126		0.0021	6.86609	-0.000345	6.86609	0.00141	6.86609		0.00198	7.85134	-4.51e-06	7.85134	0.00197	7.85134
	0.00349	9.15072	-0.000810552	9.15072	0.00187	9.15072		0.00214	7.18347	-5.10204e-06	7.18347	0.00213	7.18347		0.00266	9.34045	-9.90725e-06	9.34045	0.00264	9.34045		0.00213	9.27908	6.59e-08	9.27908	0.00213	9.27908			0.00287	10.6859	-0.000479	10.6859	0.000517	10.6859		0.00211	6.85768	-0.000347	6.85768	0.00142	6.85768		0.002	7.88318	-5.1e-06	7.88318	0.00199	7.88318
	0.00347	9.19351	-0.000835928	9.19351	0.0018	9.19351		0.00217	7.27819	-4.83163e-06	7.27819	0.00216	7.27819		0.00267	9.35419	-2.25148e-05	9.35419	0.00262	9.35419		0.00213	9.35696	-4.83e-07	9.35696	0.00213	9.35696			0.0029	10.741	-0.000483	10.741	0.000525	10.741		0.00212	6.88957	-0.00035	6.88957	0.00142	6.88957		0.00201	7.89031	-5.26e-06	7.89031	0.002	7.89031
	0.00349	9.29205	-0.000858263	9.29205	0.00177	9.29205		0.00216	7.20214	-4.88265e-06	7.20214	0.00215	7.20214		0.0027	9.38525	-2.86339e-05	9.38525	0.00264	9.38525		0.00214	9.39411	-1.5e-07	9.39411	0.00214	9.39411			0.00291	10.743	-0.000485	10.743	0.000525	10.743		0.00214	6.94529	-0.000353	6.94529	0.00143	6.94529		0.00201	7.92809	-4.87e-06	7.92809	0.002	7.92809
	0.00349	9.15949	-0.000884274	9.15949	0.00172	9.15949		0.00218	7.26277	-5.05102e-06	7.26277	0.00217	7.26277		0.00271	9.3958	-3.51883e-05	9.3958	0.00264	9.3958		0.00215	9.41394	1.58e-07	9.41394	0.00215	9.41394			0.00293	10.7823	-0.000489	10.7823	0.000528	10.7823		0.00213	6.99484	-0.000357	6.99484	0.00142	6.99484		0.00201	7.97947	-4.96e-06	7.97947	0.002	7.97947
	0.00354	9.31292	-0.000910674	9.31292	0.00172	9.31292		0.00217	7.25836	-5.06633e-06	7.25836	0.00216	7.25836		0.00271	9.45579	-4.55953e-05	9.45579	0.00262	9.45579		0.00215	9.48944	2.4e-08	9.48944	0.00215	9.48944			0.0029	10.8451	-0.000492	10.8451	0.000515	10.8451		0.00215	7.03477	-0.00036	7.03477	0.00143	7.03477		0.00202	8.02366	-5.41e-06	8.02366	0.00201	8.02366
	0.00354	9.25497	-0.000935339	9.25497	0.00167	9.25497		0.00218	7.27388	-4.81633e-06	7.27388	0.00217	7.27388		0.00272	9.496	-5.44753e-05	9.496	0.00261	9.496		0.00217	9.48161	3.24e-07	9.48161	0.00217	9.48161			0.00294	10.8723	-0.000494	10.8723	0.000529	10.8723		0.00215	7.04491	-0.000364	7.04491	0.00142	7.04491		0.00204	8.06412	-4.52e-06	8.06412	0.00203	8.06412
	0.00358	9.40598	-0.00096532	9.40598	0.00165	9.40598		0.00218	7.26328	-4.94388e-06	7.26328	0.00217	7.26328		0.00272	9.57203	-6.18658e-05	9.57203	0.0026	9.57203		0.00219	9.53053	2.21e-07	9.53053	0.00219	9.53053			0.00295	10.9055	-0.000496	10.9055	0.000531	10.9055		0.00215	7.0705	-0.000366	7.0705	0.00142	7.0705		0.00204	8.13966	-4.83e-06	8.13966	0.00203	8.13966
	0.00358	9.2952	-0.000989075	9.2952	0.0016	9.2952		0.00221	7.36782	-4.84184e-06	7.36782	0.0022	7.36782		0.00273	9.60532	-6.80414e-05	9.60532	0.00259	9.60532		0.00219	9.50202	-1.21e-07	9.50202	0.00219	9.50202			0.00297	10.9588	-0.0005	10.9588	0.000532	10.9588		0.00217	7.09616	-0.000369	7.09616	0.00143	7.09616		0.00206	8.11988	-5.05e-06	8.11988	0.00205	8.11988
	0.00357	9.35483	-0.00102	9.35483	0.00153	9.35483		0.00221	7.36243	-4.82653e-06	7.36243	0.0022	7.36243		0.00272	9.62274	-7.63586e-05	9.62274	0.00257	9.62274		0.00218	9.55913	-1.22e-07	9.55913	0.00218	9.55913			0.00298	10.9546	-0.0005	10.9546	0.000534	10.9546		0.00218	7.12	-0.000373	7.12	0.00143	7.12		0.00206	8.18073	-4.77e-06	8.18073	0.00205	8.18073
	0.00362	9.34731	-0.00104	9.34731	0.00154	9.34731		0.00224	7.34223	-4.55612e-06	7.34223	0.00223	7.34223		0.00277	9.6514	-8.5685e-05	9.6514	0.0026	9.6514		0.00221	9.6142	-1.1e-07	9.6142	0.00221	9.6142			0.00301	11.0241	-0.000505	11.0241	0.00054	11.0241		0.00219	7.16862	-0.000376	7.16862	0.00144	7.16862		0.00207	8.22552	-5.03e-06	8.22552	0.00206	8.22552
	0.00365	9.37482	-0.00107	9.37482	0.00151	9.37482		0.00224	7.41465	-5.04082e-06	7.41465	0.00223	7.41465		0.00278	9.66505	-9.53697e-05	9.66505	0.00259	9.66505		0.00222	9.65339	1.54e-07	9.65339	0.00222	9.65339			0.003	11.0717	-0.000506	11.0717	0.000532	11.0717		0.0022	7.17582	-0.000379	7.17582	0.00144	7.17582		0.00208	8.20897	-5.11e-06	8.20897	0.00207	8.20897
	0.00363	9.44234	-0.0011	9.44234	0.00143	9.44234		0.00223	7.41576	-4.94898e-06	7.41576	0.00222	7.41576		0.00281	9.707	-0.000111376	9.707	0.00259	9.707		0.00223	9.68898	2.51e-07	9.68898	0.00223	9.68898			0.00302	11.1482	-0.00051	11.1482	0.000537	11.1482		0.0022	7.17744	-0.000381	7.17744	0.00144	7.17744		0.00208	8.29027	-4.89e-06	8.29027	0.00207	8.29027
	0.00368	9.41538	-0.00112	9.41538	0.00144	9.41538		0.00226	7.38129	-4.91327e-06	7.38129	0.00225	7.38129		0.00282	9.72968	-0.000122844	9.72968	0.00257	9.72968		0.00225	9.73983	-1.95e-07	9.73983	0.00225	9.73983			0.00304	11.2065	-0.000513	11.2065	0.000538	11.2065		0.00222	7.18087	-0.000384	7.18087	0.00145	7.18087		0.00212	8.31248	-5.24e-06	8.31248	0.00211	8.31248
	0.00365	9.46917	-0.00114	9.46917	0.00137	9.46917		0.00228	7.44672	-4.83163e-06	7.44672	0.00227	7.44672		0.00282	9.76135	-0.00013246	9.76135	0.00256	9.76135		0.00226	9.784	-2.36e-07	9.784	0.00226	9.784			0.00306	11.2055	-0.000515	11.2055	0.000546	11.2055		0.00224	7.23212	-0.000386	7.23212	0.00147	7.23212		0.00212	8.31763	-4.95e-06	8.31763	0.00211	8.31763
	0.00368	9.45691	-0.00117	9.45691	0.00134	9.45691		0.00227	7.44054	-4.43367e-06	7.44054	0.00226	7.44054		0.00282	9.78233	-0.000142879	9.78233	0.00253	9.78233		0.00226	9.82424	-2.57e-07	9.82424	0.00226	9.82424			0.00304	11.2303	-0.000518	11.2303	0.000535	11.2303		0.00224	7.25429	-0.00039	7.25429	0.00146	7.25429		0.00212	8.3339	-5.39e-06	8.3339	0.00211	8.3339
	0.0037	9.51124	-0.00119	9.51124	0.00132	9.51124		0.0023	7.44941	-4.86224e-06	7.44941	0.00229	7.44941		0.00286	9.834	-0.000146838	9.834	0.00257	9.834		0.00226	9.8165	2.7e-07	9.8165	0.00226	9.8165			0.00308	11.3145	-0.000521	11.3145	0.000546	11.3145		0.00224	7.30919	-0.000395	7.30919	0.00145	7.30919		0.00212	8.43014	-5.37e-06	8.43014	0.00211	8.43014
	0.0037	9.54856	-0.00122	9.54856	0.00126	9.54856		0.00228	7.45119	-5.10204e-06	7.45119	0.00227	7.45119		0.00284	9.82018	-0.000162783	9.82018	0.00251	9.82018		0.00229	9.87854	-5.42e-08	9.87854	0.00229	9.87854			0.00309	11.3704	-0.000525	11.3704	0.000544	11.3704		0.00227	7.31992	-0.000397	7.31992	0.00148	7.31992		0.00214	8.45869	-5.09e-06	8.45869	0.00213	8.45869
	0.00374	9.4992	-0.00125	9.4992	0.00124	9.4992		0.0023	7.51787	-4.72449e-06	7.51787	0.00229	7.51787		0.00286	9.89158	-0.000176719	9.89158	0.00251	9.89158		0.00229	9.93092	2.77e-07	9.93092	0.00229	9.93092			0.00308	11.4098	-0.000527	11.4098	0.000537	11.4098		0.00226	7.35051	-0.000402	7.35051	0.00146	7.35051		0.00213	8.53252	-5.33e-06	8.53252	0.00212	8.53252
	0.00376	9.50761	-0.00127	9.50761	0.00122	9.50761		0.00231	7.55929	-4.70408e-06	7.55929	0.0023	7.55929		0.00287	9.94828	-0.000180293	9.94828	0.00251	9.94828		0.0023	9.9241	1.96e-07	9.9241	0.0023	9.9241			0.00312	11.4466	-0.000529	11.4466	0.000553	11.4466		0.00227	7.42113	-0.000405	7.42113	0.00146	7.42113		0.00217	8.50568	-5.38e-06	8.50568	0.00216	8.50568
	0.00374	9.54115	-0.0013	9.54115	0.00114	9.54115		0.00231	7.5838	-4.70408e-06	7.5838	0.0023	7.5838		0.00288	9.97838	-0.000190165	9.97838	0.0025	9.97838		0.00231	9.96373	-2.85e-07	9.96373	0.00231	9.96373			0.00312	11.5343	-0.000534	11.5343	0.000543	11.5343		0.00229	7.42886	-0.000409	7.42886	0.00147	7.42886		0.00218	8.54671	-4.98e-06	8.54671	0.00217	8.54671
	0.00376	9.64593	-0.00132	9.64593	0.00112	9.64593		0.00234	7.60952	-4.92857e-06	7.60952	0.00233	7.60952		0.00291	10.0241	-0.00020252	10.0241	0.0025	10.0241		0.00232	10.0143	-4.91e-07	10.0143	0.00232	10.0143			0.00315	11.515	-0.000535	11.515	0.000555	11.515		0.0023	7.42569	-0.000412	7.42569	0.00148	7.42569		0.00218	8.6136	-5.45e-06	8.6136	0.00217	8.6136
	0.00381	9.61646	-0.00134	9.61646	0.00113	9.61646		0.00235	7.64132	-5.01531e-06	7.64132	0.00234	7.64132		0.00291	10.0464	-0.000210945	10.0464	0.00249	10.0464		0.00233	10.0469	3.26e-07	10.0469	0.00233	10.0469			0.00315	11.5423	-0.000536	11.5423	0.000554	11.5423		0.0023	7.49073	-0.000416	7.49073	0.00147	7.49073		0.00219	8.64906	-5.6e-06	8.64906	0.00218	8.64906
	0.00381	9.65406	-0.00137	9.65406	0.00107	9.65406		0.00234	7.71228	-4.76531e-06	7.71228	0.00233	7.71228		0.00291	10.0761	-0.000222398	10.0761	0.00247	10.0761		0.00232	10.0863	-5.71e-07	10.0863	0.00232	10.0863			0.00317	11.6049	-0.000541	11.6049	0.000558	11.6049		0.00232	7.50988	-0.000421	7.50988	0.00148	7.50988		0.00219	8.68581	-5.77e-06	8.68581	0.00218	8.68581
	0.00384	9.66567	-0.0014	9.66567	0.00104	9.66567		0.00235	7.6351	-4.86735e-06	7.6351	0.00234	7.6351		0.00293	10.1405	-0.000230236	10.1405	0.00247	10.1405		0.00234	10.1088	-7.55e-07	10.1088	0.00234	10.1088			0.00317	11.629	-0.000542	11.629	0.000553	11.629		0.00232	7.4834	-0.000423	7.4834	0.00147	7.4834		0.0022	8.66747	-5.77e-06	8.66747	0.00219	8.66747
	0.00384	9.70066	-0.00143	9.70066	0.00098	9.70066		0.00238	7.7215	-4.84694e-06	7.7215	0.00237	7.7215		0.00294	10.1529	-0.00024573	10.1529	0.00245	10.1529		0.00236	10.1677	-3.43e-07	10.1677	0.00236	10.1677			0.00317	11.6746	-0.000546	11.6746	0.000551	11.6746		0.00233	7.52683	-0.000425	7.52683	0.00148	7.52683		0.00222	8.74711	-6.2e-06	8.74711	0.00221	8.74711
	0.00384	9.72644	-0.00145	9.72644	0.00094	9.72644		0.00238	7.75662	-4.72449e-06	7.75662	0.00237	7.75662		0.00297	10.1719	-0.000250338	10.1719	0.00247	10.1719		0.00236	10.1541	-4.24e-07	10.1541	0.00236	10.1541			0.00323	11.726	-0.000549	11.726	0.000566	11.726		0.00234	7.56179	-0.00043	7.56179	0.00148	7.56179		0.00223	8.74373	-5.93e-06	8.74373	0.00222	8.74373
	0.00386	9.71982	-0.00147	9.71982	0.00092	9.71982		0.0024	7.74179	-4.85204e-06	7.74179	0.00239	7.74179		0.00297	10.2341	-0.000261634	10.2341	0.00245	10.2341		0.00236	10.2027	-1.78e-07	10.2027	0.00236	10.2027			0.00319	11.7237	-0.000551	11.7237	0.000549	11.7237		0.00234	7.60035	-0.000434	7.60035	0.00147	7.60035		0.00223	8.8218	-6.08e-06	8.8218	0.00222	8.8218
	0.00387	9.72147	-0.0015	9.72147	0.00087	9.72147		0.0024	7.77472	-4.93367e-06	7.77472	0.00239	7.77472		0.00297	10.2648	-0.000274277	10.2648	0.00242	10.2648		0.00239	10.2536	-3.98e-07	10.2536	0.00239	10.2536			0.00321	11.7737	-0.000554	11.7737	0.000555	11.7737		0.00236	7.62983	-0.000439	7.62983	0.00148	7.62983		0.00223	8.83291	-6.24e-06	8.83291	0.00222	8.83291
	0.0039	9.76493	-0.00152	9.76493	0.00086	9.76493		0.0024	7.85383	-4.70918e-06	7.85383	0.00239	7.85383		0.00301	10.3051	-0.000284067	10.3051	0.00244	10.3051		0.0024	10.2473	-4.86e-07	10.2473	0.0024	10.2473			0.00324	11.7962	-0.000557	11.7962	0.000562	11.7962		0.00237	7.6541	-0.000444	7.6541	0.00148	7.6541		0.00223	8.87222	-6.2e-06	8.87222	0.00222	8.87222
	0.00392	9.88425	-0.00155	9.88425	0.00082	9.88425		0.00241	7.8334	-4.92347e-06	7.8334	0.0024	7.8334		0.00299	10.3054	-0.000296211	10.3054	0.0024	10.3054		0.0024	10.289	-1.02e-07	10.289	0.0024	10.289			0.00328	11.8706	-0.00056	11.8706	0.000576	11.8706		0.00239	7.67163	-0.000447	7.67163	0.0015	7.67163		0.00224	8.91402	-6.35e-06	8.91402	0.00223	8.91402
	0.0039	9.84239	-0.00157	9.84239	0.00076	9.84239		0.00242	7.84185	-4.72449e-06	7.84185	0.00241	7.84185		0.00303	10.3129	-0.000308272	10.3129	0.00241	10.3129		0.00242	10.3307	-1.92e-07	10.3307	0.00242	10.3307			0.00327	11.9447	-0.000563	11.9447	0.000565	11.9447		0.00239	7.68524	-0.000452	7.68524	0.00149	7.68524		0.00228	8.94105	-6.23e-06	8.94105	0.00227	8.94105
	0.00397	9.84843	-0.0016	9.84843	0.00077	9.84843		0.00244	7.87424	-5.15306e-06	7.87424	0.00243	7.87424		0.00304	10.3606	-0.000320175	10.3606	0.0024	10.3606		0.00242	10.3875	-4.83e-07	10.3875	0.00242	10.3875			0.0033	11.9746	-0.000566	11.9746	0.000571	11.9746		0.0024	7.72518	-0.000455	7.72518	0.00149	7.72518		0.00227	8.92256	-6.66e-06	8.92256	0.00226	8.92256
	0.00395	9.86732	-0.00163	9.86732	0.00069	9.86732		0.00245	7.95989	-4.85714e-06	7.95989	0.00244	7.95989		0.00304	10.4347	-0.0003292	10.4347	0.00238	10.4347		0.00243	10.4137	-3.24e-07	10.4137	0.00243	10.4137			0.00328	12.0054	-0.00057	12.0054	0.000562	12.0054		0.00241	7.76138	-0.000461	7.76138	0.00149	7.76138		0.00229	8.98129	-6.38e-06	8.98129	0.00228	8.98129
	0.00398	9.90423	-0.00166	9.90423	0.00066	9.90423		0.00244	7.87407	-5.06633e-06	7.87407	0.00243	7.87407		0.00306	10.4491	-0.000341025	10.4491	0.00238	10.4491		0.00245	10.4629	4.61e-08	10.4629	0.00245	10.4629			0.00331	12.0194	-0.000572	12.0194	0.00057	12.0194		0.00243	7.82793	-0.000469	7.82793	0.00149	7.82793		0.00229	9.04251	-6.12e-06	9.04251	0.00228	9.04251
	0.004	9.89091	-0.00168	9.89091	0.00064	9.89091		0.00248	7.93501	-4.80612e-06	7.93501	0.00247	7.93501		0.00307	10.4411	-0.000351261	10.4411	0.00237	10.4411		0.00245	10.4959	-3.74e-07	10.4959	0.00245	10.4959			0.00334	12.0902	-0.000575	12.0902	0.000579	12.0902		0.00243	7.82801	-0.000472	7.82801	0.00149	7.82801		0.00232	9.0765	-6.9e-06	9.0765	0.00231	9.0765
	0.004	9.91943	-0.00171	9.91943	0.00058	9.91943		0.00247	7.95985	-4.7602e-06	7.95985	0.00246	7.95985		0.00308	10.493	-0.000359808	10.493	0.00236	10.493		0.00247	10.5058	-2.15e-07	10.5058	0.00247	10.5058			0.00334	12.1106	-0.00058	12.1106	0.000572	12.1106		0.00245	7.85463	-0.000477	7.85463	0.0015	7.85463		0.00233	9.11138	-6.64e-06	9.11138	0.00232	9.11138
	0.00402	9.90571	-0.00173	9.90571	0.00056	9.90571		0.00249	7.95797	-4.63265e-06	7.95797	0.00248	7.95797		0.00309	10.524	-0.000369178	10.524	0.00235	10.524		0.00246	10.549	-4.56e-07	10.549	0.00246	10.549			0.00335	12.118	-0.000583	12.118	0.00057	12.118		0.00245	7.86264	-0.000486	7.86264	0.00148	7.86264		0.00233	9.15489	-6.61e-06	9.15489	0.00232	9.15489
	0.00405	9.95485	-0.00176	9.95485	0.00053	9.95485		0.0025	8.04878	-4.88265e-06	8.04878	0.00249	8.04878		0.00309	10.5563	-0.000375586	10.5563	0.00234	10.5563		0.00248	10.5328	-2.91e-07	10.5328	0.00248	10.5328			0.00335	12.1149	-0.000586	12.1149	0.000566	12.1149		0.00246	7.84554	-0.00049	7.84554	0.00148	7.84554		0.00232	9.19161	-7.29e-06	9.19161	0.00231	9.19161
	0.00405	9.90321	-0.00179	9.90321	0.00047	9.90321		0.0025	7.93989	-4.75e-06	7.93989	0.00249	7.93989		0.00311	10.5631	-0.000386308	10.5631	0.00234	10.5631		0.00248	10.548	-5.63e-07	10.548	0.00248	10.548			0.00337	12.1996	-0.00059	12.1996	0.000567	12.1996		0.00245	7.93634	-0.000495	7.93634	0.00146	7.93634		0.00233	9.1758	-6.72e-06	9.1758	0.00232	9.1758
	0.00405	10.0293	-0.00181	10.0293	0.00043	10.0293		0.00251	8.01867	-4.7398e-06	8.01867	0.0025	8.01867		0.00313	10.5902	-0.000399386	10.5902	0.00233	10.5902		0.00249	10.6078	-4.72e-07	10.6078	0.00249	10.6078			0.00338	12.2561	-0.000593	12.2561	0.00057	12.2561		0.00248	7.97427	-0.000505	7.97427	0.00147	7.97427		0.00234	9.22391	-7.34e-06	9.22391	0.00233	9.22391
	0.00408	9.97058	-0.00184	9.97058	0.0004	9.97058		0.00253	8.0308	-4.79592e-06	8.0308	0.00252	8.0308		0.00313	10.6372	-0.000407561	10.6372	0.00231	10.6372		0.00251	10.6331	-6.73e-07	10.6331	0.00251	10.6331			0.00341	12.332	-0.000597	12.332	0.000574	12.332		0.00248	7.96982	-0.00051	7.96982	0.00146	7.96982		0.00234	9.32073	-7.26e-06	9.32073	0.00233	9.32073
	0.0041	10.0881	-0.00187	10.0881	0.00036	10.0881		0.00253	8.0517	-4.79592e-06	8.0517	0.00252	8.0517		0.00315	10.6635	-0.000413408	10.6635	0.00232	10.6635		0.00251	10.6521	-2.01e-07	10.6521	0.00251	10.6521			0.00339	12.3456	-0.0006	12.3456	0.000565	12.3456		0.00249	7.99385	-0.000514	7.99385	0.00146	7.99385		0.00237	9.33544	-7.28e-06	9.33544	0.00236	9.33544
	0.00411	10.0561	-0.00189	10.0561	0.00033	10.0561		0.00253	8.00455	-5.03061e-06	8.00455	0.00252	8.00455		0.00318	10.7019	-0.000427275	10.7019	0.00233	10.7019		0.00253	10.7015	-3.96e-07	10.7015	0.00253	10.7015			0.00342	12.3574	-0.000602	12.3574	0.000573	12.3574		0.0025	8.0237	-0.000519	8.0237	0.00146	8.0237		0.00237	9.32712	-7.66e-06	9.32712	0.00235	9.32712
	0.00413	10.0809	-0.00192	10.0809	0.00029	10.0809		0.00255	8.12427	-4.97959e-06	8.12427	0.00254	8.12427		0.00318	10.7611	-0.000436236	10.7611	0.00231	10.7611		0.00253	10.7194	-4.34e-07	10.7194	0.00253	10.7194			0.00343	12.4363	-0.000605	12.4363	0.000573	12.4363		0.00251	8.03252	-0.000524	8.03252	0.00146	8.03252		0.0024	9.37977	-7.49e-06	9.37977	0.00239	9.37977
	0.00414	10.1021	-0.00195	10.1021	0.00024	10.1021		0.00256	8.11658	-4.53571e-06	8.11658	0.00255	8.11658		0.00319	10.8033	-0.000449903	10.8033	0.00229	10.8033		0.00255	10.8096	-5.84e-07	10.8096	0.00255	10.8096			0.00345	12.4426	-0.000608	12.4426	0.000576	12.4426		0.00253	8.02241	-0.000528	8.02241	0.00147	8.02241		0.00239	9.3866	-7.35e-06	9.3866	0.00238	9.3866
	0.00416	10.182	-0.00198	10.182	0.0002	10.182		0.00257	8.17966	-4.81122e-06	8.17966	0.00256	8.17966		0.0032	10.8118	-0.000460331	10.8118	0.00228	10.8118		0.00256	10.8235	-2.16e-07	10.8235	0.00256	10.8235			0.00346	12.5259	-0.000611	12.5259	0.000576	12.5259		0.00253	8.06433	-0.000538	8.06433	0.00145	8.06433		0.0024	9.45251	-7.4e-06	9.45251	0.00239	9.45251
	0.00416	10.2336	-0.002	10.2336	0.00016	10.2336		0.00258	8.18348	-4.89286e-06	8.18348	0.00257	8.18348		0.00324	10.8534	-0.000467128	10.8534	0.00231	10.8534		0.00258	10.8266	-4.78e-07	10.8266	0.00258	10.8266			0.00346	12.554	-0.000615	12.554	0.000571	12.554		0.00255	8.10722	-0.000543	8.10722	0.00146	8.10722		0.00241	9.53807	-7.85e-06	9.53807	0.00239	9.53807
	0.00421	10.269	-0.00203	10.269	0.00015	10.269		0.00259	8.17869	-4.89286e-06	8.17869	0.00258	8.17869		0.00323	10.9129	-0.000477311	10.9129	0.00228	10.9129		0.00259	10.8856	-1.63e-07	10.8856	0.00259	10.8856			0.00352	12.5671	-0.000617	12.5671	0.000588	12.5671		0.00255	8.14179	-0.000547	8.14179	0.00146	8.14179		0.00242	9.54454	-7.75e-06	9.54454	0.0024	9.54454
	0.00422	10.1926	-0.00205	10.1926	0.00012	10.1926		0.0026	8.15647	-4.80612e-06	8.15647	0.00259	8.15647		0.00323	10.9137	-0.000487878	10.9137	0.00225	10.9137		0.00259	10.9366	-2.15e-07	10.9366	0.00259	10.9366			0.0035	12.6438	-0.000622	12.6438	0.000581	12.6438		0.00257	8.14775	-0.000552	8.14775	0.00147	8.14775		0.00244	9.59052	-7.8e-06	9.59052	0.00242	9.59052
	0.00421	10.3603	-0.00208	10.3603	5.00001e-05	10.3603		0.0026	8.20361	-4.54592e-06	8.20361	0.00259	8.20361		0.00324	10.9751	-0.000495517	10.9751	0.00225	10.9751		0.0026	10.9438	-6.1e-07	10.9438	0.0026	10.9438			0.00352	12.7334	-0.000626	12.7334	0.000578	12.7334		0.00257	8.15719	-0.000562	8.15719	0.00145	8.15719		0.00244	9.60548	-7.77e-06	9.60548	0.00242	9.60548
	0.00424	10.1809	-0.00211	10.1809	2.00001e-05	10.1809		0.00263	8.15156	-4.9949e-06	8.15156	0.00262	8.15156		0.00325	11.0602	-0.000504053	11.0602	0.00224	11.0602		0.0026	10.9675	-2.23e-07	10.9675	0.0026	10.9675			0.00356	12.7356	-0.000628	12.7356	0.000594	12.7356		0.00259	8.226	-0.000566	8.226	0.00146	8.226		0.00244	9.61656	-8.46e-06	9.61656	0.00242	9.61656
	0.00426	10.3452	-0.00215	10.3452	-4e-05	10.3452		0.00264	8.18927	-4.73469e-06	8.18927	0.00263	8.18927		0.00328	11.083	-0.000518239	11.083	0.00224	11.083		0.00262	11.0118	-2.95e-07	11.0118	0.00262	11.0118			0.00356	12.7749	-0.000632	12.7749	0.000584	12.7749		0.00259	8.26576	-0.000571	8.26576	0.00145	8.26576		0.00244	9.67373	-8.17e-06	9.67373	0.00242	9.67373
	0.0043	10.3215	-0.00217	10.3215	-4.00001e-05	10.3215		0.00263	8.29923	-4.95918e-06	8.29923	0.00262	8.29923		0.00328	11.091	-0.000525086	11.091	0.00223	11.091		0.00264	11.005	-6.25e-08	11.005	0.00264	11.005			0.00354	12.8348	-0.000634	12.8348	0.00058	12.8348		0.0026	8.27195	-0.00058	8.27195	0.00144	8.27195		0.00247	9.68005	-8.56e-06	9.68005	0.00245	9.68005
	0.00429	10.3084	-0.0022	10.3084	-0.00011	10.3084		0.00265	8.33289	-4.92857e-06	8.33289	0.00264	8.33289		0.0033	11.1232	-0.000537969	11.1232	0.00222	11.1232		0.00264	11.032	-4.96e-07	11.032	0.00264	11.032			0.00357	12.8919	-0.000637	12.8919	0.000583	12.8919		0.00261	8.34774	-0.00059	8.34774	0.00143	8.34774		0.00247	9.70095	-8.61e-06	9.70095	0.00245	9.70095
	0.0043	10.4128	-0.00223	10.4128	-0.00016	10.4128		0.00266	8.38543	-4.85204e-06	8.38543	0.00265	8.38543		0.0033	11.1663	-0.0005532	11.1663	0.00219	11.1663		0.00264	11.0815	-1.92e-07	11.0815	0.00264	11.0815			0.00359	12.9281	-0.000641	12.9281	0.000585	12.9281		0.00262	8.30561	-0.000594	8.30561	0.00143	8.30561		0.00248	9.69166	-8.46e-06	9.69166	0.00246	9.69166
	0.0043	10.3673	-0.00226	10.3673	-0.00022	10.3673		0.00269	8.35537	-4.85714e-06	8.35537	0.00268	8.35537		0.00333	11.2188	-0.000560314	11.2188	0.00221	11.2188		0.00265	11.1205	-7.27e-07	11.1205	0.00265	11.1205			0.00359	12.9887	-0.000644	12.9887	0.00058	12.9887		0.00264	8.35928	-0.000599	8.35928	0.00144	8.35928		0.0025	9.76228	-8.73e-06	9.76228	0.00248	9.76228
	0.00432	10.436	-0.00229	10.436	-0.00026	10.436		0.00268	8.3593	-5.01531e-06	8.3593	0.00267	8.3593		0.00333	11.2054	-0.000569683	11.2054	0.00219	11.2054		0.00267	11.1052	-5.13e-07	11.1052	0.00267	11.1052			0.00361	12.9932	-0.000647	12.9932	0.000587	12.9932		0.00264	8.35135	-0.000609	8.35135	0.00142	8.35135		0.00249	9.82082	-8.85e-06	9.82082	0.00247	9.82082
	0.00434	10.4291	-0.00231	10.4291	-0.00028	10.4291		0.00269	8.37693	-5.20408e-06	8.37693	0.00268	8.37693		0.00333	11.2814	-0.000583536	11.2814	0.00216	11.2814		0.00267	11.1885	-4.62e-07	11.1885	0.00267	11.1885			0.00361	13.0599	-0.00065	13.0599	0.000586	13.0599		0.00265	8.42324	-0.000613	8.42324	0.00142	8.42324		0.00251	9.85331	-8.9e-06	9.85331	0.00249	9.85331
	0.00437	10.4417	-0.00234	10.4417	-0.00031	10.4417		0.00269	8.3956	-4.93367e-06	8.3956	0.00268	8.3956		0.00335	11.2782	-0.00059125	11.2782	0.00217	11.2782		0.00269	11.1668	-6.51e-07	11.1668	0.00269	11.1668			0.00364	13.0876	-0.000652	13.0876	0.000594	13.0876		0.00266	8.45726	-0.000623	8.45726	0.00141	8.45726		0.00251	9.84267	-9.17e-06	9.84267	0.00249	9.84267
	0.00437	10.4921	-0.00237	10.4921	-0.00037	10.4921		0.0027	8.39166	-4.79082e-06	8.39166	0.00269	8.39166		0.00338	11.316	-0.000604219	11.316	0.00217	11.316		0.00269	11.2254	-2.09e-07	11.2254	0.00269	11.2254			0.00365	13.1951	-0.000655	13.1951	0.000594	13.1951		0.00268	8.48874	-0.000628	8.48874	0.00142	8.48874		0.00254	9.91668	-9.23e-06	9.91668	0.00252	9.91668
	0.00438	10.5171	-0.0024	10.5171	-0.00042	10.5171		0.00271	8.48461	-4.88265e-06	8.48461	0.0027	8.48461		0.0034	11.3514	-0.000615167	11.3514	0.00217	11.3514		0.0027	11.295	-4.21e-07	11.295	0.0027	11.295			0.00367	13.1963	-0.000659	13.1963	0.000594	13.1963		0.00267	8.47045	-0.000632	8.47045	0.00141	8.47045		0.00254	9.9387	-8.55e-06	9.9387	0.00252	9.9387
	0.00442	10.5061	-0.00243	10.5061	-0.00044	10.5061		0.00273	8.49602	-4.90306e-06	8.49602	0.00272	8.49602		0.0034	11.3699	-0.000625256	11.3699	0.00215	11.3699		0.00272	11.2841	-1.73e-07	11.2841	0.00272	11.2841			0.00368	13.2228	-0.000662	13.2228	0.000594	13.2228		0.00268	8.53503	-0.000641	8.53503	0.0014	8.53503		0.00255	9.96597	-8.99e-06	9.96597	0.00253	9.96597
	0.00442	10.5322	-0.00245	10.5322	-0.00048	10.5322		0.00273	8.48582	-4.86224e-06	8.48582	0.00272	8.48582		0.00342	11.4132	-0.000640528	11.4132	0.00214	11.4132		0.00272	11.3478	-4.25e-07	11.3478	0.00272	11.3478			0.00368	13.2723	-0.000667	13.2723	0.000588	13.2723		0.00269	8.59326	-0.000651	8.59326	0.00139	8.59326		0.00254	10.003	-8.73e-06	10.003	0.00252	10.003
	0.00445	10.5453	-0.00248	10.5453	-0.00051	10.5453		0.00274	8.58348	-5.20408e-06	8.58348	0.00273	8.58348		0.00343	11.4398	-0.000650808	11.4398	0.00213	11.4398		0.00274	11.38	-8.13e-07	11.38	0.00274	11.38			0.00371	13.3101	-0.00067	13.3101	0.000594	13.3101		0.0027	8.60886	-0.000661	8.60886	0.00138	8.60886		0.00257	10.07	-9.1e-06	10.07	0.00255	10.07
	0.00446	10.6481	-0.00251	10.6481	-0.00056	10.6481		0.00276	8.5718	-5.08673e-06	8.5718	0.00275	8.5718		0.00344	11.5194	-0.000657403	11.5194	0.00213	11.5194		0.00275	11.3841	-5.1e-07	11.3841	0.00275	11.3841			0.00371	13.3469	-0.000673	13.3469	0.000588	13.3469		0.00272	8.60867	-0.000665	8.60867	0.00139	8.60867		0.00257	10.0442	-8.68e-06	10.0442	0.00255	10.0442
	0.00448	10.6129	-0.00254	10.6129	-0.0006	10.6129		0.00276	8.64032	-5.30612e-06	8.64032	0.00275	8.64032		0.00345	11.5477	-0.000669578	11.5477	0.00211	11.5477		0.00277	11.4376	-1.42e-07	11.4376	0.00277	11.4376			0.00371	13.3881	-0.000676	13.3881	0.000588	13.3881		0.00273	8.65578	-0.000674	8.65578	0.00138	8.65578		0.00258	10.13	-8.83e-06	10.13	0.00256	10.13
	0.0045	10.6675	-0.00257	10.6675	-0.00064	10.6675		0.00278	8.55516	-5.56122e-06	8.55516	0.00277	8.55516		0.00345	11.6076	-0.000672836	11.6076	0.0021	11.6076		0.00277	11.4289	-4.12e-07	11.4289	0.00277	11.4289			0.00374	13.4147	-0.000678	13.4147	0.000594	13.4147		0.00273	8.70605	-0.000679	8.70605	0.00137	8.70605		0.00258	10.1293	-9.38e-06	10.1293	0.00256	10.1293
	0.0045	10.6579	-0.0026	10.6579	-0.0007	10.6579		0.00279	8.54925	-6.27551e-06	8.54925	0.00278	8.54925		0.00348	11.6052	-0.000683903	11.6052	0.00211	11.6052		0.00276	11.4769	-4.65e-07	11.4769	0.00276	11.4769			0.00375	13.4351	-0.000682	13.4351	0.000594	13.4351		0.00274	8.74287	-0.000689	8.74287	0.00136	8.74287		0.0026	10.1674	-9.81e-06	10.1674	0.00258	10.1674
	0.00454	10.6621	-0.00264	10.6621	-0.00074	10.6621		0.0028	8.55823	-9.03061e-06	8.55823	0.00278	8.55823		0.00348	11.6253	-0.000697886	11.6253	0.00208	11.6253		0.00278	11.5043	-5.44e-07	11.5043	0.00278	11.5043			0.00376	13.4998	-0.000685	13.4998	0.000594	13.4998		0.00276	8.75304	-0.000698	8.75304	0.00136	8.75304		0.00261	10.1791	-9.81e-06	10.1791	0.00259	10.1791
	0.00453	10.7164	-0.00266	10.7164	-0.00079	10.7164		0.00281	8.69546	-1.28571e-05	8.69546	0.00278	8.69546		0.00349	11.6535	-0.000707406	11.6535	0.00208	11.6535		0.0028	11.5478	-3.93e-07	11.5478	0.0028	11.5478			0.00376	13.5253	-0.000687	13.5253	0.000594	13.5253		0.00277	8.77659	-0.000707	8.77659	0.00136	8.77659		0.00264	10.2521	-9.7e-06	10.2521	0.00262	10.2521
	0.00456	10.6976	-0.00269	10.6976	-0.00082	10.6976		0.00281	8.61449	-1.86224e-05	8.61449	0.00277	8.61449		0.0035	11.689	-0.000720603	11.689	0.00206	11.689		0.0028	11.5871	-3.08e-07	11.5871	0.0028	11.5871			0.00379	13.5375	-0.00069	13.5375	0.0006	13.5375		0.00278	8.81095	-0.000712	8.81095	0.00136	8.81095		0.00263	10.3076	-9.71e-06	10.3076	0.00261	10.3076
	0.00458	10.69	-0.00273	10.69	-0.00088	10.69		0.00284	8.75371	-2.09184e-05	8.75371	0.0028	8.75371		0.00351	11.7323	-0.000730497	11.7323	0.00205	11.7323		0.00281	11.6263	-3.43e-07	11.6263	0.00281	11.6263			0.00381	13.5755	-0.000694	13.5755	0.0006	13.5755		0.00278	8.83488	-0.000717	8.83488	0.00135	8.83488		0.00263	10.3407	-9.59e-06	10.3407	0.00261	10.3407
	0.00458	10.7661	-0.00276	10.7661	-0.00094	10.7661		0.00283	8.73786	-2.43878e-05	8.73786	0.00278	8.73786		0.00354	11.7581	-0.000742583	11.7581	0.00205	11.7581		0.00282	11.6416	-2.75e-07	11.6416	0.00282	11.6416			0.00381	13.5863	-0.000697	13.5863	0.000594	13.5863		0.0028	8.85446	-0.000726	8.85446	0.00135	8.85446		0.00264	10.4324	-9.54e-06	10.4324	0.00262	10.4324
	0.00459	10.8067	-0.00279	10.8067	-0.00099	10.8067		0.00285	8.73045	-2.83163e-05	8.73045	0.00279	8.73045		0.00353	11.8	-0.000752686	11.8	0.00202	11.8		0.00282	11.6597	-5.67e-07	11.6597	0.00282	11.6597			0.00382	13.7023	-0.0007	13.7023	0.000594	13.7023		0.00281	8.90311	-0.000731	8.90311	0.00135	8.90311		0.00265	10.4398	-1.02e-05	10.4398	0.00263	10.4398
	0.00461	10.8189	-0.00282	10.8189	-0.00103	10.8189		0.00286	8.76289	-3.61224e-05	8.76289	0.00279	8.76289		0.00358	11.8206	-0.000765833	11.8206	0.00205	11.8206		0.00282	11.7364	-6.28e-07	11.7364	0.00282	11.7364			0.00385	13.7092	-0.000702	13.7092	0.000606	13.7092		0.00281	8.94481	-0.000741	8.94481	0.00133	8.94481		0.00267	10.4655	-1.05e-05	10.4655	0.00265	10.4655
	0.00461	10.8456	-0.00285	10.8456	-0.00109	10.8456		0.00286	8.79871	-3.84694e-05	8.79871	0.00278	8.79871		0.00355	11.8882	-0.000774603	11.8882	0.002	11.8882		0.00284	11.7359	-4.54e-07	11.7359	0.00284	11.7359			0.00386	13.7057	-0.000705	13.7057	0.000606	13.7057		0.00283	8.94754	-0.000745	8.94754	0.00134	8.94754		0.00269	10.4925	-1.03e-05	10.4925	0.00267	10.4925
	0.00464	10.8136	-0.00289	10.8136	-0.00114	10.8136		0.00287	8.79525	-4.82143e-05	8.79525	0.00277	8.79525		0.00356	11.8977	-0.000787469	11.8977	0.00199	11.8977		0.00285	11.8045	-8.81e-07	11.8045	0.00285	11.8045			0.00386	13.763	-0.000708	13.763	0.000606	13.763		0.00284	8.99907	-0.000755	8.99907	0.00133	8.99907		0.00269	10.4896	-1.01e-05	10.4896	0.00267	10.4896
	0.00467	10.8608	-0.00292	10.8608	-0.00117	10.8608		0.00288	8.91588	-5.48464e-05	8.91588	0.00277	8.91588		0.0036	11.9492	-0.000802536	11.9492	0.00199	11.9492		0.00287	11.838	-4.91e-07	11.838	0.00287	11.838			0.00387	13.7401	-0.00071	13.7401	0.000606	13.7401		0.00284	9.02876	-0.000759	9.02876	0.00132	9.02876		0.00269	10.5397	-1.06e-05	10.5397	0.00267	10.5397
	0.00469	10.852	-0.00295	10.852	-0.00121	10.852		0.00288	8.89716	-5.93332e-05	8.89716	0.00276	8.89716		0.00359	11.9345	-0.000813244	11.9345	0.00196	11.9345		0.00288	11.8518	-7.02e-07	11.8518	0.00288	11.8518			0.00389	13.8127	-0.000713	13.8127	0.000612	13.8127		0.00284	9.05898	-0.000764	9.05898	0.00131	9.05898		0.0027	10.5704	-1.06e-05	10.5704	0.00268	10.5704
	0.00464	10.8202	-0.00298	10.8202	-0.00132	10.8202		0.0029	8.95751	-6.5426e-05	8.95751	0.00277	8.95751		0.00361	12.0047	-0.000823431	12.0047	0.00196	12.0047		0.00289	11.8759	-8.84e-07	11.8759	0.00289	11.8759			0.00392	13.8466	-0.000715	13.8466	0.000618	13.8466		0.00287	9.1169	-0.000773	9.1169	0.00132	9.1169		0.0027	10.5965	-1.1e-05	10.5965	0.00268	10.5965
	0.00472	10.7945	-0.00301	10.7945	-0.0013	10.7945		0.00292	9.03849	-7.09061e-05	9.03849	0.00278	9.03849		0.00364	12.0036	-0.000836203	12.0036	0.00197	12.0036		0.00289	11.9109	-6.59e-07	11.9109	0.00289	11.9109			0.00392	13.9046	-0.000719	13.9046	0.000612	13.9046		0.00288	9.14093	-0.000783	9.14093	0.00131	9.14093		0.00272	10.5917	-1.07e-05	10.5917	0.0027	10.5917
	0.00472	10.8511	-0.00304	10.8511	-0.00136	10.8511		0.00293	8.98022	-7.62398e-05	8.98022	0.00278	8.98022		0.00364	12.0668	-0.000847292	12.0668	0.00195	12.0668		0.0029	11.9311	-5.16e-07	11.9311	0.0029	11.9311			0.00394	13.9736	-0.000722	13.9736	0.000618	13.9736		0.00289	9.19221	-0.000788	9.19221	0.00131	9.19221		0.00273	10.6735	-1.08e-05	10.6735	0.00271	10.6735
	0.00472	10.8428	-0.00308	10.8428	-0.00144	10.8428		0.0029	9.14129	-8.84429e-05	9.14129	0.00272	9.14129		0.00365	12.1255	-0.000859692	12.1255	0.00193	12.1255		0.00292	11.9461	-7.11e-07	11.9461	0.00292	11.9461			0.00393	14.0177	-0.000726	14.0177	0.000606	14.0177		0.00289	9.2228	-0.000797	9.2228	0.0013	9.2228		0.00274	10.6907	-1.06e-05	10.6907	0.00272	10.6907
	0.00474	10.8499	-0.00311	10.8499	-0.00148	10.8499		0.00295	9.11145	-9.43061e-05	9.11145	0.00276	9.11145		0.00366	12.1579	-0.000865572	12.1579	0.00193	12.1579		0.00292	11.9879	-8.68e-07	11.9879	0.00292	11.9879			0.00396	14.0703	-0.000729	14.0703	0.000618	14.0703		0.00291	9.25802	-0.000807	9.25802	0.0013	9.25802		0.00275	10.7731	-1.1e-05	10.7731	0.00273	10.7731
	0.00478	10.8696	-0.00313	10.8696	-0.00148	10.8696		0.00295	9.1316	-0.000102562	9.1316	0.00274	9.1316		0.00368	12.1591	-0.000884319	12.1591	0.00191	12.1591		0.00294	12.0712	-7.17e-07	12.0712	0.00294	12.0712			0.00398	14.1185	-0.000733	14.1185	0.000618	14.1185		0.00289	9.29927	-0.000816	9.29927	0.00126	9.29927		0.00275	10.7793	-1.09e-05	10.7793	0.00273	10.7793
	0.0048	10.8795	-0.00316	10.8795	-0.00152	10.8795		0.00295	9.13548	-0.000108716	9.13548	0.00273	9.13548		0.0037	12.1973	-0.000893056	12.1973	0.00191	12.1973		0.00294	12.08	-7.4e-07	12.08	0.00294	12.08			0.00398	14.2182	-0.000736	14.2182	0.000618	14.2182		0.00291	9.34089	-0.000821	9.34089	0.00127	9.34089		0.00277	10.8188	-1.14e-05	10.8188	0.00275	10.8188
	0.0048	10.9474	-0.00319	10.9474	-0.00158	10.9474		0.00296	9.24384	-0.000113935	9.24384	0.00273	9.24384		0.0037	12.2693	-0.000900892	12.2693	0.0019	12.2693		0.00295	12.0925	-9.05e-07	12.0925	0.00295	12.0925			0.00403	14.2685	-0.000738	14.2685	0.000629	14.2685		0.00293	9.34436	-0.00083	9.34436	0.00127	9.34436		0.00278	10.8663	-1.17e-05	10.8663	0.00276	10.8663
	0.0048	10.9772	-0.00322	10.9772	-0.00164	10.9772		0.00299	9.24704	-0.000122712	9.24704	0.00274	9.24704		0.0037	12.2247	-0.000907614	12.2247	0.00188	12.2247		0.00297	12.0822	-9.03e-07	12.0822	0.00297	12.0822			0.00404	14.276	-0.000743	14.276	0.000629	14.276		0.00294	9.36074	-0.00084	9.36074	0.00126	9.36074		0.00279	10.9042	-1.16e-05	10.9042	0.00277	10.9042
	0.0048	10.9289	-0.00325	10.9289	-0.0017	10.9289		0.003	9.20446	-0.000129128	9.20446	0.00274	9.20446		0.00373	12.2614	-0.000915831	12.2614	0.0019	12.2614		0.00297	12.0992	-7.53e-07	12.0992	0.00297	12.0992			0.00403	14.3276	-0.000746	14.3276	0.000618	14.3276		0.00295	9.37294	-0.000844	9.37294	0.00126	9.37294		0.0028	10.9552	-1.16e-05	10.9552	0.00278	10.9552
	0.00483	10.965	-0.00328	10.965	-0.00173	10.965		0.003	9.26859	-0.000134754	9.26859	0.00273	9.26859		0.00373	12.3036	-0.000925431	12.3036	0.00188	12.3036		0.00298	12.1258	-1.08e-06	12.1258	0.00298	12.1258			0.00404	14.3136	-0.000747	14.3136	0.000624	14.3136		0.00295	9.43371	-0.000854	9.43371	0.00124	9.43371		0.00279	10.9581	-1.2e-05	10.9581	0.00277	10.9581
	0.00486	10.9495	-0.00331	10.9495	-0.00176	10.9495		0.003	9.3212	-0.000142573	9.3212	0.00271	9.3212		0.00375	12.3744	-0.000938261	12.3744	0.00187	12.3744		0.00299	12.1909	-9.99e-07	12.1909	0.00299	12.1909			0.00407	14.3235	-0.000749	14.3235	0.000629	14.3235		0.00298	9.47262	-0.000863	9.47262	0.00125	9.47262		0.00279	10.9787	-1.22e-05	10.9787	0.00277	10.9787
	0.00488	10.9399	-0.00335	10.9399	-0.00182	10.9399		0.003	9.35228	-0.00015152	9.35228	0.0027	9.35228		0.00376	12.3514	-0.000951106	12.3514	0.00186	12.3514		0.003	12.2107	-5.18e-07	12.2107	0.003	12.2107			0.00409	14.3169	-0.000752	14.3169	0.000635	14.3169		0.00298	9.4742	-0.000868	9.4742	0.00124	9.4742		0.00282	10.9818	-1.23e-05	10.9818	0.0028	10.9818
	0.00488	11.046	-0.00338	11.046	-0.00188	11.046		0.00302	9.3361	-0.000158167	9.3361	0.0027	9.3361		0.00376	12.4067	-0.000963742	12.4067	0.00183	12.4067		0.00302	12.2196	-9e-07	12.2196	0.00302	12.2196			0.00407	14.3874	-0.000754	14.3874	0.000624	14.3874		0.00298	9.51662	-0.000877	9.51662	0.00123	9.51662		0.00283	11.0492	-1.21e-05	11.0492	0.00281	11.0492
	0.0049	10.9681	-0.00341	10.9681	-0.00192	10.9681		0.00304	9.36736	-0.000164393	9.36736	0.00271	9.36736		0.00378	12.4169	-0.000974997	12.4169	0.00183	12.4169		0.00302	12.2653	-9.28e-07	12.2653	0.00302	12.2653			0.00411	14.4263	-0.000757	14.4263	0.000635	14.4263		0.00299	9.52455	-0.000887	9.52455	0.00122	9.52455		0.00284	11.1165	-1.21e-05	11.1165	0.00282	11.1165
	0.00493	11.0389	-0.00344	11.0389	-0.00195	11.0389		0.00305	9.37379	-0.000172643	9.37379	0.0027	9.37379		0.0038	12.4333	-0.000986928	12.4333	0.00183	12.4333		0.00302	12.2752	-5.69e-07	12.2752	0.00302	12.2752			0.00409	14.4954	-0.000759	14.4954	0.000624	14.4954		0.003	9.56521	-0.000891	9.56521	0.00122	9.56521		0.00283	11.1383	-1.24e-05	11.1383	0.00281	11.1383
	0.00494	11.0488	-0.00347	11.0488	-0.002	11.0488		0.00305	9.41896	-0.000182382	9.41896	0.00269	9.41896		0.00381	12.4968	-0.000993822	12.4968	0.00182	12.4968		0.00304	12.3192	-1.18e-06	12.3192	0.00304	12.3192			0.00412	14.5034	-0.000762	14.5034	0.000635	14.5034		0.00301	9.63543	-0.000901	9.63543	0.00121	9.63543		0.00286	11.2078	-1.19e-05	11.2078	0.00284	11.2078
	0.00493	11.0755	-0.00351	11.0755	-0.00209	11.0755		0.00306	9.42484	-0.000193082	9.42484	0.00267	9.42484		0.00383	12.5284	-0.00101	12.5284	0.00181	12.5284		0.00306	12.3664	-9.79e-07	12.3664	0.00306	12.3664			0.00412	14.4906	-0.000764	14.4906	0.000635	14.4906		0.00303	9.61197	-0.00091	9.61197	0.00121	9.61197		0.00287	11.2689	-1.24e-05	11.2689	0.00285	11.2689
	0.00494	11.064	-0.00354	11.064	-0.00214	11.064		0.00308	9.36954	-0.000202282	9.36954	0.00268	9.36954		0.00383	12.5645	-0.00102	12.5645	0.00179	12.5645		0.00306	12.4003	-6.99e-07	12.4003	0.00306	12.4003			0.00415	14.5669	-0.000766	14.5669	0.000641	14.5669		0.00304	9.65432	-0.000915	9.65432	0.00121	9.65432		0.00287	11.2645	-1.23e-05	11.2645	0.00285	11.2645
	0.00499	11.0297	-0.00358	11.0297	-0.00217	11.0297		0.00309	9.46015	-0.000210637	9.46015	0.00267	9.46015		0.00385	12.5881	-0.00103	12.5881	0.0018	12.5881		0.00307	12.4102	-1.04e-06	12.4102	0.00307	12.4102			0.00415	14.6277	-0.000769	14.6277	0.000641	14.6277		0.00304	9.65835	-0.000924	9.65835	0.00119	9.65835		0.00287	11.2742	-1.22e-05	11.2742	0.00285	11.2742
	0.00499	11.059	-0.00361	11.059	-0.00223	11.059		0.00308	9.45624	-0.000219985	9.45624	0.00264	9.45624		0.00385	12.604	-0.00104	12.604	0.00177	12.604		0.00308	12.4791	-9.87e-07	12.4791	0.00308	12.4791			0.00416	14.6113	-0.000771	14.6113	0.000641	14.6113		0.00305	9.67913	-0.000934	9.67913	0.00118	9.67913		0.00289	11.3317	-1.23e-05	11.3317	0.00287	11.3317
	0.00501	11.0459	-0.00364	11.0459	-0.00227	11.0459		0.00309	9.49887	-0.000227565	9.49887	0.00263	9.49887		0.00386	12.6455	-0.00105	12.6455	0.00175	12.6455		0.00309	12.4975	-5.97e-07	12.4975	0.00309	12.4975			0.0042	14.6276	-0.000774	14.6276	0.000653	14.6276		0.00307	9.68266	-0.000938	9.68266	0.00119	9.68266		0.00289	11.3832	-1.26e-05	11.3832	0.00286	11.3832
	0.00502	11.0476	-0.00368	11.0476	-0.00234	11.0476		0.00312	9.44119	-0.000234758	9.44119	0.00265	9.44119		0.00388	12.6809	-0.00107	12.6809	0.00175	12.6809		0.0031	12.5476	-9.77e-07	12.5476	0.0031	12.5476			0.0042	14.6463	-0.000775	14.6463	0.000647	14.6463		0.00307	9.68747	-0.000943	9.68747	0.00118	9.68747		0.0029	11.4246	-1.27e-05	11.4246	0.00287	11.4246
	0.00502	11.0966	-0.00371	11.0966	-0.0024	11.0966		0.00312	9.49643	-0.000240329	9.49643	0.00264	9.49643		0.00389	12.6921	-0.00107	12.6921	0.00174	12.6921		0.00309	12.55	-1.23e-06	12.55	0.00309	12.55			0.00422	14.7073	-0.000779	14.7073	0.000653	14.7073		0.00308	9.73034	-0.000953	9.73034	0.00117	9.73034		0.00292	11.4771	-1.33e-05	11.4771	0.00289	11.4771
	0.00506	11.1294	-0.00374	11.1294	-0.00242	11.1294		0.00313	9.49336	-0.000249169	9.49336	0.00263	9.49336		0.0039	12.7749	-0.00109	12.7749	0.00173	12.7749		0.00312	12.5948	-1.21e-06	12.5948	0.00312	12.5948			0.00425	14.7587	-0.000781	14.7587	0.000659	14.7587		0.00309	9.76742	-0.000962	9.76742	0.00117	9.76742		0.00292	11.4484	-1.31e-05	11.4484	0.00289	11.4484
	0.00507	11.1149	-0.00378	11.1149	-0.00249	11.1149		0.00314	9.55163	-0.000255047	9.55163	0.00263	9.55163		0.00394	12.819	-0.0011	12.819	0.00174	12.819		0.00313	12.6648	-1.18e-06	12.6648	0.00313	12.6648			0.00423	14.7498	-0.000783	14.7498	0.000653	14.7498		0.00311	9.83328	-0.000972	9.83328	0.00117	9.83328		0.00294	11.5075	-1.32e-05	11.5075	0.00291	11.5075
	0.00509	11.1393	-0.00381	11.1393	-0.00253	11.1393		0.00314	9.55282	-0.000263468	9.55282	0.00261	9.55282		0.00391	12.8096	-0.0011	12.8096	0.0017	12.8096		0.00314	12.6533	-8.39e-07	12.6533	0.00314	12.6533			0.00425	14.8195	-0.000787	14.8195	0.000653	14.8195		0.00313	9.86911	-0.000972	9.86911	0.00119	9.86911		0.00294	11.5288	-1.26e-05	11.5288	0.00291	11.5288
	0.00507	11.0533	-0.00385	11.0533	-0.00263	11.0533		0.00316	9.60246	-0.000268147	9.60246	0.00262	9.60246		0.00392	12.888	-0.00112	12.888	0.00168	12.888		0.00314	12.6807	-1.03e-06	12.6807	0.00314	12.6807			0.00426	14.8789	-0.00079	14.8789	0.000653	14.8789		0.00314	9.89504	-0.000981	9.89504	0.00118	9.89504		0.00294	11.528	-1.24e-05	11.528	0.00292	11.528
	0.0051	11.0329	-0.00389	11.0329	-0.00268	11.0329		0.00317	9.67922	-0.000276589	9.67922	0.00262	9.67922		0.00395	12.9542	-0.00113	12.9542	0.00169	12.9542		0.00315	12.6829	-1.12e-06	12.6829	0.00315	12.6829			0.00427	14.923	-0.000792	14.923	0.000653	14.923		0.00313	9.93675	-0.000991	9.93675	0.00115	9.93675		0.00297	11.5722	-1.29e-05	11.5722	0.00294	11.5722
	0.00512	11.0838	-0.00393	11.0838	-0.00274	11.0838		0.00318	9.6631	-0.000282818	9.6631	0.00261	9.6631		0.00395	12.9163	-0.00114	12.9163	0.00167	12.9163		0.00316	12.729	-1.11e-06	12.729	0.00316	12.729			0.00427	14.906	-0.000794	14.906	0.000653	14.906		0.00313	9.95194	-0.00101	9.95194	0.00111	9.95194		0.00296	11.6086	-1.31e-05	11.6086	0.00293	11.6086
	0.00512	11.0952	-0.00397	11.0952	-0.00282	11.0952		0.00317	9.76981	-0.000289394	9.76981	0.00259	9.76981		0.00397	12.9559	-0.00116	12.9559	0.00166	12.9559		0.00317	12.7682	-9.65e-07	12.7682	0.00317	12.7682			0.00431	14.9467	-0.000802	14.9467	0.000665	14.9467		0.00316	9.96623	-0.00101	9.96623	0.00114	9.96623		0.00298	11.6738	-1.27e-05	11.6738	0.00295	11.6738
	0.00517	11.068	-0.004	11.068	-0.00283	11.068		0.00319	9.74478	-0.000297756	9.74478	0.00259	9.74478		0.004	13.0281	-0.00117	13.0281	0.00167	13.0281		0.00318	12.7933	-1.49e-06	12.7933	0.00318	12.7933			0.0043	14.9772	-0.000802	14.9772	0.000659	14.9772		0.00315	9.99316	-0.00102	9.99316	0.00111	9.99316		0.003	11.6593	-1.31e-05	11.6593	0.00297	11.6593
	0.00518	11.0896	-0.00404	11.0896	-0.0029	11.0896		0.0032	9.7336	-0.000307503	9.7336	0.00258	9.7336		0.004	13.061	-0.00118	13.061	0.00165	13.061		0.00319	12.8127	-1.31e-06	12.8127	0.00319	12.8127			0.00436	15.0027	-0.000802	15.0027	0.000671	15.0027		0.00316	10.0528	-0.00103	10.0528	0.0011	10.0528		0.00299	11.6838	-1.28e-05	11.6838	0.00296	11.6838
	0.00517	11.0166	-0.00408	11.0166	-0.00299	11.0166		0.0032	9.76842	-0.000316593	9.76842	0.00257	9.76842		0.00401	13.0692	-0.00119	13.0692	0.00164	13.0692		0.00319	12.8454	-1.01e-06	12.8454	0.00319	12.8454			0.00433	15.0378	-0.00081	15.0378	0.000659	15.0378		0.00318	10.084	-0.00103	10.084	0.00112	10.084		0.003	11.7623	-1.3e-05	11.7623	0.00297	11.7623
	0.00518	11.0166	-0.00412	11.0166	-0.00306	11.0166		0.00323	9.81739	-0.000323751	9.81739	0.00258	9.81739		0.00402	13.0842	-0.0012	13.0842	0.00162	13.0842		0.00321	12.8757	-4.63e-07	12.8757	0.00321	12.8757			0.00436	15.126	-0.00081	15.126	0.000665	15.126		0.00319	10.1004	-0.00105	10.1004	0.0011	10.1004		0.00301	11.7543	-1.28e-05	11.7543	0.00298	11.7543
	0.00523	11.0598	-0.00415	11.0598	-0.00307	11.0598		0.00324	9.8178	-0.000334445	9.8178	0.00257	9.8178		0.00404	13.1547	-0.00121	13.1547	0.00163	13.1547		0.00322	12.8827	-9.78e-07	12.8827	0.00322	12.8827			0.00436	15.1701	-0.00081	15.1701	0.000665	15.1701		0.0032	10.1485	-0.00105	10.1485	0.00111	10.1485		0.00302	11.8475	-1.27e-05	11.8475	0.00299	11.8475
	0.00525	10.991	-0.00419	10.991	-0.00313	10.991		0.00323	9.85486	-0.000340931	9.85486	0.00255	9.85486		0.00405	13.1722	-0.00122	13.1722	0.00162	13.1722		0.00324	12.9338	-1.27e-06	12.9338	0.00324	12.9338			0.00438	15.2447	-0.000817	15.2447	0.000671	15.2447		0.00323	10.1718	-0.00106	10.1718	0.00112	10.1718		0.00304	11.8338	-1.28e-05	11.8338	0.00301	11.8338
	0.00526	11.0357	-0.00423	11.0357	-0.0032	11.0357		0.00324	9.84822	-0.000348154	9.84822	0.00254	9.84822		0.00405	13.2025	-0.00123	13.2025	0.0016	13.2025		0.00323	12.9544	-9.05e-07	12.9544	0.00323	12.9544			0.00438	15.2672	-0.000817	15.2672	0.000665	15.2672		0.00322	10.2197	-0.00107	10.2197	0.00109	10.2197		0.00304	11.8497	-1.31e-05	11.8497	0.00301	11.8497
	0.00528	11.0475	-0.00426	11.0475	-0.00324	11.0475		0.00327	9.90133	-0.000355858	9.90133	0.00256	9.90133		0.00407	13.2041	-0.00123	13.2041	0.0016	13.2041		0.00325	12.9819	-1.08e-06	12.9819	0.00325	12.9819			0.0044	15.3113	-0.000817	15.3113	0.000665	15.3113		0.00322	10.3153	-0.00108	10.3153	0.00107	10.3153		0.00305	11.9803	-1.27e-05	11.9803	0.00302	11.9803
	0.00528	10.9741	-0.0043	10.9741	-0.00332	10.9741		0.00328	9.9348	-0.000365687	9.9348	0.00255	9.9348		0.00407	13.2202	-0.00125	13.2202	0.00158	13.2202		0.00327	13.0252	-1.67e-06	13.0252	0.00327	13.0252			0.00442	15.3926	-0.000825	15.3926	0.000671	15.3926		0.00323	10.2989	-0.00108	10.2989	0.00106	10.2989		0.00306	12.0052	-1.34e-05	12.0052	0.00303	12.0052
	0.00533	10.9857	-0.00434	10.9857	-0.00335	10.9857		0.00329	10.0101	-0.000373273	10.0101	0.00254	10.0101		0.00411	13.3001	-0.00125	13.3001	0.0016	13.3001		0.00328	13.0452	-7.78e-07	13.0452	0.00328	13.0452			0.00444	15.3688	-0.000825	15.3688	0.000676	15.3688		0.00325	10.3505	-0.00109	10.3505	0.00106	10.3505		0.00306	12.0345	-1.33e-05	12.0345	0.00303	12.0345
	0.00531	10.9511	-0.00438	10.9511	-0.00345	10.9511		0.0033	9.95439	-0.000382034	9.95439	0.00254	9.95439		0.00411	13.2894	-0.00126	13.2894	0.00158	13.2894		0.00328	13.0622	-1.29e-06	13.0622	0.00328	13.0622			0.00448	15.4271	-0.000825	15.4271	0.000688	15.4271		0.00325	10.3923	-0.00109	10.3923	0.00106	10.3923		0.00308	12.054	-1.34e-05	12.054	0.00305	12.054
	0.00533	10.9075	-0.00442	10.9075	-0.00351	10.9075		0.0033	10.0391	-0.000390201	10.0391	0.00252	10.0391		0.00412	13.3322	-0.00127	13.3322	0.00157	13.3322		0.00329	13.0842	-1.29e-06	13.0842	0.00329	13.0842			0.00445	15.4888	-0.000833	15.4888	0.000671	15.4888		0.00326	10.4179	-0.0011	10.4179	0.00105	10.4179		0.0031	12.0915	-1.33e-05	12.0915	0.00307	12.0915
	0.00536	11.036	-0.00446	11.036	-0.00356	11.036		0.00333	10.0051	-0.000399417	10.0051	0.00253	10.0051		0.00412	13.3958	-0.00129	13.3958	0.00155	13.3958		0.00331	13.1136	-1.09e-06	13.1136	0.00331	13.1136			0.00448	15.499	-0.000833	15.499	0.000682	15.499		0.00327	10.4515	-0.00111	10.4515	0.00104	10.4515		0.00311	12.1325	-1.33e-05	12.1325	0.00308	12.1325
	0.00534	10.9946	-0.00451	10.9946	-0.00368	10.9946		0.00332	10.0534	-0.000409172	10.0534	0.0025	10.0534		0.00415	13.4016	-0.0013	13.4016	0.00156	13.4016		0.00331	13.1958	-1.23e-06	13.1958	0.00331	13.1958			0.00451	15.5534	-0.000833	15.5534	0.000688	15.5534		0.00328	10.4909	-0.00112	10.4909	0.00103	10.4909		0.00311	12.1714	-1.29e-05	12.1714	0.00308	12.1714
	0.00538	10.9651	-0.00455	10.9651	-0.00372	10.9651		0.00333	10.1524	-0.000419403	10.1524	0.00249	10.1524		0.00414	13.4131	-0.0013	13.4131	0.00153	13.4131		0.00331	13.1878	-1.35e-06	13.1878	0.00331	13.1878			0.00452	15.5516	-0.000841	15.5516	0.000694	15.5516		0.00329	10.5194	-0.00113	10.5194	0.00103	10.5194		0.00312	12.1864	-1.34e-05	12.1864	0.00309	12.1864
	0.00541	10.9307	-0.0046	10.9307	-0.00379	10.9307		0.00335	10.0868	-0.000424074	10.0868	0.0025	10.0868		0.00416	13.4712	-0.00132	13.4712	0.00152	13.4712		0.00333	13.2516	-1.45e-06	13.2516	0.00333	13.2516			0.00451	15.6037	-0.000841	15.6037	0.000682	15.6037		0.0033	10.556	-0.00114	10.556	0.00102	10.556		0.00312	12.1986	-1.28e-05	12.1986	0.00309	12.1986
	0.00542	10.9999	-0.00465	10.9999	-0.00388	10.9999		0.00334	10.1252	-0.00043446	10.1252	0.00247	10.1252		0.0042	13.5232	-0.00133	13.5232	0.00155	13.5232		0.00333	13.2671	-1.45e-06	13.2671	0.00333	13.2671			0.00455	15.6206	-0.000841	15.6206	0.000694	15.6206		0.00331	10.5655	-0.00114	10.5655	0.00103	10.5655		0.00315	12.2267	-1.33e-05	12.2267	0.00312	12.2267
	0.00544	10.9817	-0.0047	10.9817	-0.00396	10.9817		0.00336	10.105	-0.000440073	10.105	0.00248	10.105		0.0042	13.5333	-0.00134	13.5333	0.00152	13.5333		0.00335	13.2759	-1.3e-06	13.2759	0.00335	13.2759			0.00453	15.6607	-0.000849	15.6607	0.000688	15.6607		0.00332	10.5703	-0.00115	10.5703	0.00102	10.5703		0.00313	12.2957	-1.3e-05	12.2957	0.0031	12.2957
	0.00546	10.8758	-0.00474	10.8758	-0.00402	10.8758		0.00338	10.1742	-0.000448512	10.1742	0.00248	10.1742		0.0042	13.5294	-0.00135	13.5294	0.0015	13.5294		0.00335	13.3422	-1.32e-06	13.3422	0.00335	13.3422			0.00456	15.7162	-0.000849	15.7162	0.000694	15.7162		0.00333	10.6525	-0.00116	10.6525	0.00101	10.6525		0.00316	12.3725	-1.25e-05	12.3725	0.00314	12.3725
	0.00547	10.9173	-0.00479	10.9173	-0.00411	10.9173		0.00339	10.2054	-0.000460209	10.2054	0.00247	10.2054		0.00421	13.6019	-0.00136	13.6019	0.00149	13.6019		0.00337	13.3632	-1.56e-06	13.3632	0.00337	13.3632			0.00459	15.7417	-0.000849	15.7417	0.0007	15.7417		0.00334	10.6485	-0.00116	10.6485	0.00102	10.6485		0.00316	12.327	-1.31e-05	12.327	0.00313	12.327
	0.00549	10.8383	-0.00484	10.8383	-0.00419	10.8383		0.0034	10.2316	-0.000468078	10.2316	0.00246	10.2316		0.00424	13.6348	-0.00137	13.6348	0.0015	13.6348		0.00336	13.3778	-1.49e-06	13.3778	0.00336	13.3778			0.00459	15.8026	-0.000857	15.8026	0.000694	15.8026		0.00335	10.6963	-0.00117	10.6963	0.00101	10.6963		0.00318	12.3728	-1.31e-05	12.3728	0.00315	12.3728
	0.00549	10.8666	-0.00488	10.8666	-0.00427	10.8666		0.00341	10.2137	-0.000474931	10.2137	0.00246	10.2137		0.00424	13.6748	-0.00138	13.6748	0.00147	13.6748		0.00339	13.4244	-1.9e-06	13.4244	0.00339	13.4244			0.00459	15.8496	-0.000857	15.8496	0.000694	15.8496		0.00335	10.7458	-0.00118	10.7458	0.000992	10.7458		0.00319	12.4005	-1.28e-05	12.4005	0.00316	12.4005
	0.0055	10.8142	-0.00492	10.8142	-0.00434	10.8142		0.00342	10.1976	-0.000483653	10.1976	0.00245	10.1976		0.00426	13.7107	-0.00139	13.7107	0.00149	13.7107		0.00341	13.4515	-1.61e-06	13.4515	0.00341	13.4515			0.00462	15.8738	-0.000865	15.8738	0.000694	15.8738		0.00338	10.7864	-0.00119	10.7864	0.001	10.7864		0.00317	12.4542	-1.28e-05	12.4542	0.00314	12.4542
	0.00554	10.7859	-0.00497	10.7859	-0.0044	10.7859		0.00343	10.2739	-0.000491352	10.2739	0.00245	10.2739		0.00426	13.7277	-0.0014	13.7277	0.00146	13.7277		0.00342	13.4963	-1.65e-06	13.4963	0.00342	13.4963			0.00462	15.9419	-0.000865	15.9419	0.000694	15.9419		0.00337	10.8309	-0.0012	10.8309	0.000974	10.8309		0.00319	12.5033	-1.26e-05	12.5033	0.00316	12.5033
	0.00554	10.7059	-0.00501	10.7059	-0.00448	10.7059		0.00343	10.3278	-0.000502373	10.3278	0.00243	10.3278		0.00427	13.7437	-0.00142	13.7437	0.00144	13.7437		0.00342	13.5516	-1.43e-06	13.5516	0.00342	13.5516			0.00463	15.9974	-0.000865	15.9974	0.000694	15.9974		0.00339	10.8762	-0.00121	10.8762	0.000975	10.8762		0.0032	12.5069	-1.26e-05	12.5069	0.00317	12.5069
	0.00554	10.768	-0.00505	10.768	-0.00456	10.768		0.00344	10.3658	-0.000510204	10.3658	0.00242	10.3658		0.00428	13.7947	-0.00143	13.7947	0.00142	13.7947		0.00342	13.561	-1.14e-06	13.561	0.00342	13.561			0.00464	16.1333	-0.000873	16.1333	0.000694	16.1333		0.00339	10.8958	-0.00121	10.8958	0.000975	10.8958		0.00323	12.523	-1.33e-05	12.523	0.0032	12.523
	0.00555	10.7008	-0.0051	10.7008	-0.00465	10.7008		0.00346	10.3197	-0.000520408	10.3197	0.00242	10.3197		0.0043	13.8368	-0.00144	13.8368	0.00141	13.8368		0.00343	13.5867	-1.41e-06	13.5867	0.00343	13.5867			0.00467	16.1015	-0.000873	16.1015	0.000706	16.1015		0.00342	10.894	-0.00122	10.894	0.000986	10.894		0.00323	12.5752	-1.33e-05	12.5752	0.0032	12.5752
	0.00558	10.6304	-0.00514	10.6304	-0.0047	10.6304		0.00346	10.3646	-0.00052551	10.3646	0.00241	10.3646		0.00431	13.8492	-0.00146	13.8492	0.0014	13.8492		0.00345	13.6276	-1.51e-06	13.6276	0.00345	13.6276			0.00468	16.1737	-0.000881	16.1737	0.0007	16.1737		0.00342	10.9371	-0.00123	10.9371	0.000967	10.9371		0.00323	12.6006	-1.28e-05	12.6006	0.0032	12.6006
	0.0056	10.6669	-0.00518	10.6669	-0.00476	10.6669		0.00346	10.3571	-0.000535714	10.3571	0.00239	10.3571		0.00433	13.8938	-0.00147	13.8938	0.00139	13.8938		0.00345	13.6659	-1.44e-06	13.6659	0.00345	13.6659			0.0047	16.1961	-0.000881	16.1961	0.000706	16.1961		0.00342	10.9977	-0.00124	10.9977	0.000948	10.9977		0.00324	12.6366	-1.29e-05	12.6366	0.00321	12.6366
	0.00558	10.5519	-0.00523	10.5519	-0.00488	10.5519		0.00347	10.4303	-0.000545918	10.4303	0.00238	10.4303		0.00432	13.9537	-0.00147	13.9537	0.00138	13.9537		0.00347	13.6698	-1.5e-06	13.6698	0.00347	13.6698			0.00471	16.2659	-0.000881	16.2659	0.000706	16.2659		0.00343	10.9859	-0.00124	10.9859	0.000958	10.9859		0.00324	12.6767	-1.3e-05	12.6767	0.00321	12.6767
	0.00562	10.5225	-0.00528	10.5225	-0.00494	10.5225		0.00349	10.429	-0.000556122	10.429	0.00238	10.429		0.00436	13.9657	-0.00148	13.9657	0.00139	13.9657		0.00347	13.6989	-1.51e-06	13.6989	0.00347	13.6989			0.00473	16.235	-0.000889	16.235	0.000706	16.235		0.00346	10.9587	-0.00125	10.9587	0.000969	10.9587		0.00325	12.6966	-1.3e-05	12.6966	0.00322	12.6966
	0.00565	10.4235	-0.00533	10.4235	-0.00501	10.4235		0.0035	10.4618	-0.000561224	10.4618	0.00238	10.4618		0.00435	14.0027	-0.0015	14.0027	0.00135	14.0027		0.00348	13.7452	-1.63e-06	13.7452	0.00348	13.7452			0.00474	16.3378	-0.000889	16.3378	0.000712	16.3378		0.00345	11.0088	-0.00125	11.0088	0.000959	11.0088		0.00327	12.7995	-1.31e-05	12.7995	0.00324	12.7995
	0.00565	10.45	-0.00537	10.45	-0.00509	10.45		0.00349	10.4377	-0.000571429	10.4377	0.00235	10.4377		0.00436	14.0444	-0.00151	14.0444	0.00133	14.0444		0.00348	13.7695	-1.77e-06	13.7695	0.00348	13.7695			0.00473	16.3331	-0.000889	16.3331	0.0007	16.3331		0.00346	11.0361	-0.00125	11.0361	0.000951	11.0361		0.00328	12.8244	-1.29e-05	12.8244	0.00325	12.8244
	0.00565	10.3687	-0.00541	10.3687	-0.00517	10.3687		0.00351	10.5692	-0.000576531	10.5692	0.00236	10.5692		0.00438	14.1021	-0.00153	14.1021	0.00133	14.1021		0.0035	13.8205	-1.68e-06	13.8205	0.0035	13.8205			0.00474	16.3949	-0.000897	16.3949	0.000706	16.3949		0.00348	11.0897	-0.00126	11.0897	0.000952	11.0897		0.00329	12.8701	-1.36e-05	12.8701	0.00326	12.8701
	0.00571	10.3029	-0.00545	10.3029	-0.00519	10.3029		0.00353	10.5964	-0.000586735	10.5964	0.00236	10.5964		0.00441	14.1257	-0.00154	14.1257	0.00133	14.1257		0.00351	13.8405	-1.74e-06	13.8405	0.00351	13.8405			0.00474	16.4275	-0.000897	16.4275	0.0007	16.4275		0.00349	11.139	-0.00126	11.139	0.000962	11.139		0.00329	12.8829	-1.3e-05	12.8829	0.00326	12.8829
	0.0057	10.4067	-0.00549	10.4067	-0.00528	10.4067		0.00353	10.6385	-0.000596939	10.6385	0.00234	10.6385		0.0044	14.1876	-0.00156	14.1876	0.00129	14.1876		0.00351	13.8212	-1.61e-06	13.8212	0.00351	13.8212			0.00478	16.4997	-0.000905	16.4997	0.000706	16.4997		0.00348	11.1584	-0.00127	11.1584	0.000933	11.1584		0.00331	12.9339	-1.32e-05	12.9339	0.00328	12.9339
	0.00571	10.2652	-0.00554	10.2652	-0.00537	10.2652		0.00353	10.672	-0.000607143	10.672	0.00232	10.672		0.00442	14.214	-0.00157	14.214	0.00128	14.214		0.00355	13.8764	-1.88e-06	13.8764	0.00355	13.8764			0.00479	16.5511	-0.000905	16.5511	0.000712	16.5511		0.00349	11.2307	-0.00128	11.2307	0.000924	11.2307		0.00331	12.9639	-1.3e-05	12.9639	0.00328	12.9639
	0.00571	10.2332	-0.00557	10.2332	-0.00543	10.2332		0.00357	10.7678	-0.000617347	10.7678	0.00234	10.7678		0.00442	14.2572	-0.00157	14.2572	0.00128	14.2572		0.00354	13.9084	-1.76e-06	13.9084	0.00354	13.9084			0.00479	16.5986	-0.000905	16.5986	0.000712	16.5986		0.00353	11.269	-0.00129	11.269	0.000945	11.269		0.00333	13.0134	-1.37e-05	13.0134	0.0033	13.0134
	0.00574	10.2095	-0.00561	10.2095	-0.00548	10.2095		0.00356	10.7428	-0.000627551	10.7428	0.0023	10.7428		0.00443	14.2497	-0.00158	14.2497	0.00126	14.2497		0.00355	13.9222	-2.3e-06	13.9222	0.00355	13.9222			0.00484	16.6364	-0.000913	16.6364	0.000718	16.6364		0.00352	11.2776	-0.00129	11.2776	0.000935	11.2776		0.00333	12.9991	-1.3e-05	12.9991	0.0033	12.9991
	0.00579	10.1631	-0.00566	10.1631	-0.00553	10.1631		0.00357	10.8247	-0.000637755	10.8247	0.00229	10.8247		0.00446	14.2872	-0.0016	14.2872	0.00126	14.2872		0.00356	13.9485	-2.15e-06	13.9485	0.00356	13.9485			0.00485	16.6712	-0.000913	16.6712	0.000724	16.6712		0.00353	11.3338	-0.0013	11.3338	0.000926	11.3338		0.00334	13.0277	-1.32e-05	13.0277	0.00331	13.0277
	0.00576	10.1456	-0.0057	10.1456	-0.00564	10.1456		0.00357	10.8207	-0.000647959	10.8207	0.00227	10.8207		0.00447	14.2828	-0.0016	14.2828	0.00128	14.2828		0.00357	13.9524	-2.01e-06	13.9524	0.00357	13.9524			0.00486	16.7011	-0.000913	16.7011	0.000724	16.7011		0.00355	11.3355	-0.00131	11.3355	0.000927	11.3355		0.00336	13.0893	-1.29e-05	13.0893	0.00333	13.0893
	0.00578	10.1123	-0.00575	10.1123	-0.00572	10.1123		0.00359	10.8364	-0.000658163	10.8364	0.00227	10.8364		0.00447	14.3316	-0.00161	14.3316	0.00125	14.3316		0.00359	13.9941	-2.04e-06	13.9941	0.00359	13.9941			0.00486	16.8043	-0.000921	16.8043	0.000718	16.8043		0.00356	11.3506	-0.00132	11.3506	0.000918	11.3506		0.00336	13.1492	-1.27e-05	13.1492	0.00333	13.1492
	0.00582	10.1213	-0.00579	10.1213	-0.00576	10.1213		0.00362	10.864	-0.000673469	10.864	0.00227	10.864		0.00448	14.3692	-0.00163	14.3692	0.00123	14.3692		0.00359	14.0466	-1.82e-06	14.0466	0.00359	14.0466			0.00488	16.8276	-0.000921	16.8276	0.000724	16.8276		0.00357	11.4242	-0.00132	11.4242	0.000928	11.4242		0.00337	13.1641	-1.33e-05	13.1641	0.00334	13.1641
	0.00582	10.1046	-0.00583	10.1046	-0.00584	10.1046		0.0036	10.9367	-0.000683673	10.9367	0.00223	10.9367		0.0045	14.3861	-0.00164	14.3861	0.00122	14.3861		0.0036	14.0007	-1.72e-06	14.0007	0.0036	14.0007			0.00489	16.8383	-0.000929	16.8383	0.000718	16.8383		0.00358	11.4395	-0.00133	11.4395	0.00092	11.4395		0.00338	13.1872	-1.27e-05	13.1872	0.00335	13.1872
	0.00584	10.0507	-0.00587	10.0507	-0.0059	10.0507		0.00361	10.897	-0.000693878	10.897	0.00222	10.897		0.00451	14.4226	-0.00165	14.4226	0.00121	14.4226		0.00361	14.0632	-2.03e-06	14.0632	0.00361	14.0632			0.00488	16.8882	-0.000929	16.8882	0.000712	16.8882		0.00358	11.483	-0.00134	11.483	0.000901	11.483		0.00339	13.1798	-1.26e-05	13.1798	0.00336	13.1798
	0.00584	10.013	-0.00591	10.013	-0.00598	10.013		0.00364	10.92	-0.000704082	10.92	0.00223	10.92		0.00452	14.4338	-0.00167	14.4338	0.00119	14.4338		0.00362	14.1057	-1.85e-06	14.1057	0.00362	14.1057			0.00492	16.9082	-0.000929	16.9082	0.000724	16.9082		0.00359	11.5482	-0.00135	11.5482	0.000892	11.5482		0.0034	13.2202	-1.31e-05	13.2202	0.00337	13.2202
	0.00586	10.0552	-0.00596	10.0552	-0.00606	10.0552		0.00364	10.9369	-0.000714286	10.9369	0.00221	10.9369		0.00455	14.4525	-0.00168	14.4525	0.00119	14.4525		0.00363	14.0858	-1.91e-06	14.0858	0.00363	14.0858			0.0049	16.9402	-0.000937	16.9402	0.000718	16.9402		0.0036	11.5617	-0.00135	11.5617	0.000902	11.5617		0.0034	13.2601	-1.31e-05	13.2601	0.00337	13.2601
	0.00592	10.0023	-0.006	10.0023	-0.00608	10.0023		0.00365	10.9562	-0.00072449	10.9562	0.0022	10.9562		0.00453	14.4618	-0.00168	14.4618	0.00117	14.4618		0.00363	14.1378	-2.11e-06	14.1378	0.00363	14.1378			0.00493	16.947	-0.000937	16.947	0.000724	16.947		0.0036	11.6117	-0.00136	11.6117	0.000883	11.6117		0.0034	13.3123	-1.32e-05	13.3123	0.00337	13.3123
	0.00589	9.92101	-0.00604	9.92101	-0.00619	9.92101		0.00365	10.9907	-0.000734694	10.9907	0.00218	10.9907		0.00457	14.5282	-0.00169	14.5282	0.00118	14.5282		0.00364	14.1593	-1.8e-06	14.1593	0.00364	14.1593			0.00496	16.9948	-0.000937	16.9948	0.000735	16.9948		0.00361	11.6776	-0.00137	11.6776	0.000874	11.6776		0.00343	13.4076	-1.32e-05	13.4076	0.0034	13.4076
	0.00592	9.89046	-0.00608	9.89046	-0.00624	9.89046		0.00366	11.0962	-0.000744898	11.0962	0.00217	11.0962		0.00457	14.5617	-0.00171	14.5617	0.00115	14.5617		0.00364	14.16	-1.91e-06	14.16	0.00364	14.16			0.00497	17.1131	-0.000944	17.1131	0.000735	17.1131		0.00362	11.7099	-0.00138	11.7099	0.000865	11.7099		0.00343	13.3802	-1.33e-05	13.3802	0.0034	13.3802
	0.0059	9.80739	-0.00613	9.80739	-0.00636	9.80739		0.0037	11.06	-0.000755102	11.06	0.00219	11.06		0.00458	14.6505	-0.00172	14.6505	0.00114	14.6505		0.00366	14.1957	-2.32e-06	14.1957	0.00366	14.1957			0.00497	17.0855	-0.000944	17.0855	0.000729	17.0855		0.00364	11.7333	-0.00139	11.7333	0.000866	11.7333		0.00345	13.4036	-1.27e-05	13.4036	0.00342	13.4036
	0.00594	9.76953	-0.00617	9.76953	-0.0064	9.76953		0.00368	11.1082	-0.000770408	11.1082	0.00214	11.1082		0.00461	14.6643	-0.00174	14.6643	0.00114	14.6643		0.00368	14.2656	-1.86e-06	14.2656	0.00368	14.2656			0.005	17.0641	-0.000944	17.0641	0.000735	17.0641		0.00364	11.7303	-0.00139	11.7303	0.000866	11.7303		0.00345	13.4896	-1.32e-05	13.4896	0.00342	13.4896
	0.00598	9.72867	-0.00622	9.72867	-0.00646	9.72867		0.0037	11.2128	-0.000780612	11.2128	0.00214	11.2128		0.00462	14.6986	-0.00175	14.6986	0.00112	14.6986		0.00368	14.2863	-2.19e-06	14.2863	0.00368	14.2863			0.00501	17.1024	-0.000952	17.1024	0.000741	17.1024		0.00366	11.7488	-0.0014	11.7488	0.000868	11.7488		0.00346	13.5017	-1.3e-05	13.5017	0.00343	13.5017
	0.00598	9.78134	-0.00626	9.78134	-0.00654	9.78134		0.00369	11.145	-0.000790816	11.145	0.00211	11.145		0.00462	14.7338	-0.00176	14.7338	0.00109	14.7338		0.00369	14.2878	-2.17e-06	14.2878	0.00369	14.2878			0.005	17.1636	-0.000952	17.1636	0.000735	17.1636		0.00366	11.8406	-0.00141	11.8406	0.000849	11.8406		0.00347	13.5059	-1.25e-05	13.5059	0.00345	13.5059
	0.00602	9.6773	-0.00629	9.6773	-0.00656	9.6773		0.00371	11.101	-0.000806122	11.101	0.0021	11.101		0.00465	14.7434	-0.00178	14.7434	0.00109	14.7434		0.00371	14.3411	-2.24e-06	14.3411	0.00371	14.3411			0.00503	17.2468	-0.00096	17.2468	0.000735	17.2468		0.00367	11.8438	-0.00142	11.8438	0.00084	11.8438		0.00349	13.5594	-1.3e-05	13.5594	0.00346	13.5594
	0.00602	9.75937	-0.00633	9.75937	-0.00664	9.75937		0.00374	11.1093	-0.000816327	11.1093	0.00211	11.1093		0.00465	14.7918	-0.00178	14.7918	0.00109	14.7918		0.00372	14.2949	-2.16e-06	14.2949	0.00372	14.2949			0.00506	17.2776	-0.00096	17.2776	0.000741	17.2776		0.00369	11.8725	-0.00142	11.8725	0.00086	11.8725		0.00348	13.5812	-1.29e-05	13.5812	0.00345	13.5812
	0.00603	9.68	-0.00638	9.68	-0.00673	9.68		0.00374	11.2091	-0.000826531	11.2091	0.00209	11.2091		0.00467	14.7905	-0.00181	14.7905	0.00106	14.7905		0.00371	14.3787	-2.04e-06	14.3787	0.00371	14.3787			0.00506	17.3023	-0.00096	17.3023	0.000741	17.3023		0.00369	11.9001	-0.00143	11.9001	0.000822	11.9001		0.0035	13.6063	-1.29e-05	13.6063	0.00347	13.6063
	0.00605	9.58439	-0.00642	9.58439	-0.00679	9.58439		0.00376	11.1895	-0.000841837	11.1895	0.00208	11.1895		0.00467	14.8574	-0.00181	14.8574	0.00106	14.8574		0.00374	14.4108	-2.61e-06	14.4108	0.00373	14.4108			0.00507	17.3438	-0.00096	17.3438	0.000747	17.3438		0.0037	11.92	-0.00144	11.92	0.000813	11.92		0.00351	13.6707	-1.32e-05	13.6707	0.00348	13.6707
	0.00605	9.6103	-0.00646	9.6103	-0.00687	9.6103		0.00376	11.2429	-0.000852041	11.2429	0.00206	11.2429		0.00469	14.8667	-0.00182	14.8667	0.00105	14.8667		0.00375	14.4589	-2.53e-06	14.4589	0.00374	14.4589			0.00506	17.3757	-0.000968	17.3757	0.000735	17.3757		0.00371	11.9325	-0.00144	11.9325	0.000823	11.9325		0.00351	13.7026	-1.29e-05	13.7026	0.00348	13.7026
	0.00608	9.47642	-0.00651	9.47642	-0.00694	9.47642		0.00377	11.307	-0.000862245	11.307	0.00205	11.307		0.00469	14.8903	-0.00183	14.8903	0.00102	14.8903		0.00375	14.4727	-2.54e-06	14.4727	0.00374	14.4727			0.00511	17.3759	-0.000968	17.3759	0.000753	17.3759		0.00372	11.9709	-0.00144	11.9709	0.000833	11.9709		0.00354	13.7305	-1.31e-05	13.7305	0.00351	13.7305
	0.00608	9.45865	-0.00655	9.45865	-0.00702	9.45865		0.00378	11.3073	-0.000872449	11.3073	0.00204	11.3073		0.00471	14.9002	-0.00185	14.9002	0.00102	14.9002		0.00377	14.4854	-2.58e-06	14.4854	0.00376	14.4854			0.0051	17.4498	-0.000968	17.4498	0.000747	17.4498		0.00373	12.0204	-0.00145	12.0204	0.000824	12.0204		0.00353	13.7509	-1.26e-05	13.7509	0.0035	13.7509
	0.0061	9.41294	-0.00658	9.41294	-0.00706	9.41294		0.00378	11.3541	-0.000887755	11.3541	0.002	11.3541		0.00472	14.9406	-0.00186	14.9406	0.0009966	14.9406		0.00378	14.5232	-2.55e-06	14.5232	0.00377	14.5232			0.00514	17.4504	-0.000976	17.4504	0.000759	17.4504		0.00374	12.0554	-0.00147	12.0554	0.000797	12.0554		0.00354	13.8085	-1.28e-05	13.8085	0.00351	13.8085
	0.00611	9.33073	-0.00663	9.33073	-0.00715	9.33073		0.0038	11.3794	-0.000897959	11.3794	0.002	11.3794		0.00473	14.9752	-0.00188	14.9752	0.000978839	14.9752		0.00379	14.56	-2.25e-06	14.56	0.00379	14.56			0.00512	17.5905	-0.000976	17.5905	0.000741	17.5905		0.00376	12.1055	-0.00147	12.1055	0.000817	12.1055		0.00354	13.8169	-1.32e-05	13.8169	0.00351	13.8169
	0.00616	9.31515	-0.0067	9.31515	-0.00724	9.31515		0.0038	11.4467	-0.000913265	11.4467	0.00197	11.4467		0.00474	14.9937	-0.0019	14.9937	0.000933656	14.9937		0.00379	14.583	-2.4e-06	14.583	0.00379	14.583			0.00514	17.5808	-0.000976	17.5808	0.000753	17.5808		0.00376	12.1411	-0.00148	12.1411	0.000798	12.1411		0.00355	13.8846	-1.34e-05	13.8846	0.00352	13.8846
	0.00614	9.24277	-0.00676	9.24277	-0.00738	9.24277		0.00381	11.4093	-0.000928571	11.4093	0.00195	11.4093		0.00476	14.9921	-0.00192	14.9921	0.000927244	14.9921		0.0038	14.6229	-2.3e-06	14.6229	0.0038	14.6229			0.00517	17.6065	-0.000984	17.6065	0.000753	17.6065		0.00377	12.1894	-0.00149	12.1894	0.000789	12.1894		0.00358	13.9226	-1.31e-05	13.9226	0.00355	13.9226
	0.00619	9.25842	-0.0068	9.25842	-0.00741	9.25842		0.00382	11.4636	-0.000938776	11.4636	0.00194	11.4636		0.00477	15.0646	-0.00193	15.0646	0.000908139	15.0646		0.00381	14.5987	-2.34e-06	14.5987	0.00381	14.5987			0.00518	17.6431	-0.000984	17.6431	0.000759	17.6431		0.00379	12.2031	-0.0015	12.2031	0.00079	12.2031		0.00358	13.9402	-1.3e-05	13.9402	0.00355	13.9402
	0.00618	9.24235	-0.00684	9.24235	-0.0075	9.24235		0.00385	11.5001	-0.000954082	11.5001	0.00194	11.5001		0.00477	15.0771	-0.00193	15.0771	0.000907594	15.0771		0.00383	14.615	-2.53e-06	14.615	0.00382	14.615			0.00519	17.7309	-0.000992	17.7309	0.000753	17.7309		0.00378	12.2378	-0.00151	12.2378	0.000761	12.2378		0.0036	13.9936	-1.31e-05	13.9936	0.00357	13.9936
	0.00621	9.16401	-0.00688	9.16401	-0.00755	9.16401		0.00384	11.5665	-0.000964286	11.5665	0.00191	11.5665		0.00478	15.1276	-0.00196	15.1276	0.000863561	15.1276		0.00383	14.6731	-2.72e-06	14.6731	0.00382	14.6731			0.00519	17.6887	-0.000992	17.6887	0.000759	17.6887		0.00379	12.2782	-0.00152	12.2782	0.000752	12.2782		0.00358	13.992	-1.25e-05	13.992	0.00355	13.992
	0.00621	9.18506	-0.00692	9.18506	-0.00763	9.18506		0.00387	11.4633	-0.000979592	11.4633	0.00191	11.4633		0.00478	15.1239	-0.00196	15.1239	0.000862811	15.1239		0.00384	14.6631	-2.68e-06	14.6631	0.00383	14.6631			0.00522	17.7385	-0.000992	17.7385	0.000765	17.7385		0.00381	12.3076	-0.00152	12.3076	0.000772	12.3076		0.0036	14.006	-1.35e-05	14.006	0.00357	14.006
	0.00621	9.18381	-0.00696	9.18381	-0.00771	9.18381		0.00386	11.4772	-0.000989796	11.4772	0.00188	11.4772		0.00481	15.1686	-0.00197	15.1686	0.000865861	15.1686		0.00384	14.6972	-2.37e-06	14.6972	0.00384	14.6972			0.00523	17.8274	-0.001	17.8274	0.000765	17.8274		0.00381	12.3465	-0.00153	12.3465	0.000753	12.3465		0.00361	14.0624	-1.27e-05	14.0624	0.00358	14.0624
	0.00627	9.13001	-0.007	9.13001	-0.00773	9.13001		0.00388	11.5506	-0.001	11.5506	0.00188	11.5506		0.00483	15.1654	-0.002	15.1654	0.000829111	15.1654		0.00385	14.7338	-2.92e-06	14.7338	0.00384	14.7338			0.00526	17.884	-0.001	17.884	0.000765	17.884		0.00383	12.3788	-0.00154	12.3788	0.000755	12.3788		0.00362	14.043	-1.28e-05	14.043	0.00359	14.043
	0.00629	9.05475	-0.00704	9.05475	-0.00779	9.05475		0.00388	11.5816	-0.00102	11.5816	0.00185	11.5816		0.00484	15.2549	-0.00201	15.2549	0.000811283	15.2549		0.00386	14.7848	-2.61e-06	14.7848	0.00385	14.7848			0.00525	17.8801	-0.001	17.8801	0.000759	17.8801		0.00384	12.3931	-0.00154	12.3931	0.000765	12.3931		0.00364	14.078	-1.31e-05	14.078	0.00361	14.078
	0.00627	9.04215	-0.00708	9.04215	-0.00789	9.04215		0.00388	11.5621	-0.00103	11.5621	0.00182	11.5621		0.00484	15.2605	-0.00203	15.2605	0.000782772	15.2605		0.00389	14.781	-2.55e-06	14.781	0.00388	14.781			0.00528	17.9946	-0.00101	17.9946	0.000771	17.9946		0.00384	12.4072	-0.00155	12.4072	0.000746	12.4072		0.00364	14.1579	-1.27e-05	14.1579	0.00361	14.1579
	0.00629	8.93912	-0.00713	8.93912	-0.00797	8.93912		0.00392	11.6093	-0.00104	11.6093	0.00184	11.6093		0.00487	15.2627	-0.00204	15.2627	0.000785072	15.2627		0.0039	14.855	-2.59e-06	14.855	0.00389	14.855			0.00528	17.9546	-0.00101	17.9546	0.000765	17.9546		0.00385	12.4443	-0.00156	12.4443	0.000737	12.4443		0.00365	14.2123	-1.31e-05	14.2123	0.00362	14.2123
	0.00632	8.94021	-0.00718	8.94021	-0.00804	8.94021		0.00393	11.5909	-0.00105	11.5909	0.00183	11.5909		0.00487	15.2689	-0.00204	15.2689	0.000787983	15.2689		0.0039	14.8585	-2.35e-06	14.8585	0.0039	14.8585			0.00532	17.9814	-0.00101	17.9814	0.000776	17.9814		0.00387	12.4614	-0.00156	12.4614	0.000757	12.4614		0.00365	14.2334	-1.3e-05	14.2334	0.00362	14.2334
	0.00634	8.86415	-0.00721	8.86415	-0.00808	8.86415		0.00392	11.6419	-0.00107	11.6419	0.00179	11.6419		0.00491	15.2699	-0.00206	15.2699	0.000798956	15.2699		0.00391	14.8389	-2.61e-06	14.8389	0.0039	14.8389			0.00529	18.0148	-0.00102	18.0148	0.000765	18.0148		0.00388	12.555	-0.00157	12.555	0.000748	12.555		0.00366	14.2765	-1.31e-05	14.2765	0.00363	14.2765
	0.00635	8.80348	-0.00725	8.80348	-0.00815	8.80348		0.00393	11.6696	-0.00108	11.6696	0.00177	11.6696		0.00491	15.3274	-0.00207	15.3274	0.000770972	15.3274		0.00392	14.9138	-2.57e-06	14.9138	0.00391	14.9138			0.00532	18.0869	-0.00102	18.0869	0.000765	18.0869		0.00389	12.5363	-0.00158	12.5363	0.000739	12.5363		0.00367	14.3335	-1.31e-05	14.3335	0.00364	14.3335
	0.00637	8.82991	-0.00729	8.82991	-0.00821	8.82991		0.00395	11.6892	-0.00109	11.6892	0.00177	11.6892		0.00492	15.3788	-0.00208	15.3788	0.000752311	15.3788		0.00393	14.9302	-2.7e-06	14.9302	0.00392	14.9302			0.00534	18.12	-0.00102	18.12	0.000771	18.12		0.00389	12.6004	-0.00158	12.6004	0.00072	12.6004		0.0037	14.3171	-1.32e-05	14.3171	0.00367	14.3171
	0.00637	8.72981	-0.00733	8.72981	-0.00829	8.72981		0.00396	11.7033	-0.00111	11.7033	0.00175	11.7033		0.00493	15.3721	-0.00211	15.3721	0.000707039	15.3721		0.00394	14.9571	-2.43e-06	14.9571	0.00394	14.9571			0.00534	18.1636	-0.00102	18.1636	0.000771	18.1636		0.00391	12.616	-0.00158	12.616	0.00074	12.616		0.00369	14.3645	-1.34e-05	14.3645	0.00366	14.3645
	0.00637	8.66406	-0.00737	8.66406	-0.00837	8.66406		0.00397	11.7663	-0.00112	11.7663	0.00174	11.7663		0.00492	15.3804	-0.00213	15.3804	0.000669778	15.3804		0.00395	15.0061	-2.63e-06	15.0061	0.00394	15.0061			0.00537	18.1851	-0.00102	18.1851	0.000776	18.1851		0.00392	12.6682	-0.00159	12.6682	0.000731	12.6682		0.0037	14.4534	-1.35e-05	14.4534	0.00367	14.4534
	0.00642	8.70625	-0.0074	8.70625	-0.00838	8.70625		0.00398	11.659	-0.00113	11.659	0.00171	11.659		0.00494	15.4251	-0.00214	15.4251	0.000661405	15.4251		0.00396	14.9978	-2.74e-06	14.9978	0.00395	14.9978			0.00537	18.2314	-0.00103	18.2314	0.000771	18.2314		0.00392	12.7288	-0.0016	12.7288	0.000712	12.7288		0.0037	14.4235	-1.35e-05	14.4235	0.00367	14.4235
	0.0064	8.58408	-0.00744	8.58408	-0.00848	8.58408		0.00398	11.7937	-0.00115	11.7937	0.00168	11.7937		0.00497	15.4625	-0.00215	15.4625	0.000663628	15.4625		0.00398	15.0508	-2.59e-06	15.0508	0.00397	15.0508			0.0054	18.2606	-0.00103	18.2606	0.000782	18.2606		0.00394	12.7235	-0.0016	12.7235	0.000732	12.7235		0.0037	14.5382	-1.31e-05	14.5382	0.00367	14.5382
	0.00648	8.59377	-0.00748	8.59377	-0.00848	8.59377		0.00398	11.8021	-0.00116	11.8021	0.00166	11.8021		0.00498	15.4795	-0.00218	15.4795	0.000617895	15.4795		0.00398	15.0752	-2.75e-06	15.0752	0.00397	15.0752			0.00539	18.2832	-0.00103	18.2832	0.000776	18.2832		0.00395	12.7364	-0.00161	12.7364	0.000724	12.7364		0.00374	14.5694	-1.32e-05	14.5694	0.00371	14.5694
	0.00645	8.55392	-0.00752	8.55392	-0.00859	8.55392		0.00401	11.8451	-0.00117	11.8451	0.00166	11.8451		0.00499	15.5189	-0.00219	15.5189	0.000600183	15.5189		0.00399	15.1335	-2.61e-06	15.1335	0.00398	15.1335			0.00541	18.3741	-0.00104	18.3741	0.000782	18.3741		0.00396	12.7302	-0.00161	12.7302	0.000734	12.7302		0.00373	14.5828	-1.34e-05	14.5828	0.0037	14.5828
	0.00643	8.51988	-0.00756	8.51988	-0.00869	8.51988		0.004	11.8215	-0.00119	11.8215	0.00162	11.8215		0.00499	15.5416	-0.00221	15.5416	0.000570683	15.5416		0.00399	15.1358	-2.68e-06	15.1358	0.00398	15.1358			0.00543	18.3838	-0.00104	18.3838	0.000788	18.3838		0.00396	12.7399	-0.00162	12.7399	0.000715	12.7399		0.00375	14.6403	-1.38e-05	14.6403	0.00372	14.6403
	0.00648	8.53536	-0.0076	8.53536	-0.00872	8.53536		0.00405	11.8004	-0.0012	11.8004	0.00165	11.8004		0.00502	15.5838	-0.00222	15.5838	0.000574322	15.5838		0.004	15.1402	-2.77e-06	15.1402	0.00399	15.1402			0.00545	18.4712	-0.00104	18.4712	0.000794	18.4712		0.00396	12.7646	-0.00162	12.7646	0.000715	12.7646		0.00375	14.5899	-1.34e-05	14.5899	0.00372	14.5899
	0.00651	8.5257	-0.00764	8.5257	-0.00877	8.5257		0.00403	11.8494	-0.00121	11.8494	0.0016	11.8494		0.00503	15.586	-0.00224	15.586	0.000556211	15.586		0.00402	15.1801	-2.7e-06	15.1801	0.00401	15.1801			0.00544	18.4855	-0.00104	18.4855	0.000788	18.4855		0.00398	12.7956	-0.00163	12.7956	0.000716	12.7956		0.00376	14.6449	-1.37e-05	14.6449	0.00373	14.6449
	0.00651	8.51425	-0.00767	8.51425	-0.00883	8.51425		0.00402	11.9504	-0.00123	11.9504	0.00156	11.9504		0.00503	15.6267	-0.00225	15.6267	0.000528744	15.6267		0.00402	15.1575	-2.49e-06	15.1575	0.00402	15.1575			0.00545	18.5107	-0.00105	18.5107	0.000788	18.5107		0.004	12.7885	-0.00164	12.7885	0.000717	12.7885		0.00377	14.7174	-1.39e-05	14.7174	0.00374	14.7174
	0.00651	8.47615	-0.0077	8.47615	-0.00889	8.47615		0.00405	11.9194	-0.00124	11.9194	0.00156	11.9194		0.00505	15.6302	-0.00225	15.6302	0.00054885	15.6302		0.00402	15.1734	-2.83e-06	15.1734	0.00401	15.1734			0.00545	18.5746	-0.00105	18.5746	0.000782	18.5746		0.004	12.8066	-0.00164	12.8066	0.000717	12.8066		0.00379	14.7414	-1.36e-05	14.7414	0.00376	14.7414
	0.00654	8.44871	-0.00774	8.44871	-0.00894	8.44871		0.00407	11.9322	-0.00126	11.9322	0.00155	11.9322		0.00505	15.6285	-0.00228	15.6285	0.00049205	15.6285		0.00405	15.19	-2.85e-06	15.19	0.00404	15.19			0.0055	18.6397	-0.00106	18.6397	0.000794	18.6397		0.004	12.8486	-0.00165	12.8486	0.000698	12.8486		0.00379	14.7861	-1.32e-05	14.7861	0.00376	14.7861
	0.00654	8.4229	-0.00778	8.4229	-0.00902	8.4229		0.00407	11.9815	-0.00127	11.9815	0.00153	11.9815		0.00508	15.7074	-0.0023	15.7074	0.000481539	15.7074		0.00404	15.2377	-2.82e-06	15.2377	0.00403	15.2377			0.00551	19.55	-0.00118	19.55	0.000606	19.55		0.00402	12.8854	-0.00165	12.8854	0.000718	12.8854		0.00381	14.7937	-1.31e-05	14.7937	0.00378	14.7937
	0.00658	8.331	-0.00782	8.331	-0.00906	8.331		0.00407	11.9995	-0.00129	11.9995	0.0015	11.9995		0.00509	15.7154	-0.00232	15.7154	0.000459067	15.7154		0.00405	15.2568	-2.91e-06	15.2568	0.00404	15.2568			0.00552	19.486	-0.0013	19.486	0.000438	19.486		0.00402	12.8722	-0.00166	12.8722	0.000699	12.8722		0.00381	14.8207	-1.28e-05	14.8207	0.00378	14.8207
	0.00658	8.3739	-0.00785	8.3739	-0.00912	8.3739		0.00409	11.9657	-0.00131	11.9657	0.00148	11.9657		0.0051	15.7543	-0.00234	15.7543	0.000425611	15.7543		0.00407	15.2746	-2.96e-06	15.2746	0.00406	15.2746			0.00552	19.3972	-0.00138	19.3972	0.000321	19.3972		0.00404	12.9141	-0.00166	12.9141	0.000719	12.9141		0.00381	14.835	-1.31e-05	14.835	0.00378	14.835
	0.00659	8.41544	-0.00789	8.41544	-0.00919	8.41544		0.00409	11.916	-0.00132	11.916	0.00145	11.916		0.00513	15.7279	-0.00236	15.7279	0.000418517	15.7279		0.00409	15.3004	-3.25e-06	15.3004	0.00408	15.3004			0.00556	19.4445	-0.00144	19.4445	0.000254	19.4445		0.00405	12.9314	-0.00167	12.9314	0.00071	12.9314		0.00383	14.8877	-1.37e-05	14.8877	0.0038	14.8877
	0.00661	8.42635	-0.00792	8.42635	-0.00923	8.42635		0.00411	12.0047	-0.00134	12.0047	0.00144	12.0047		0.00512	15.7934	-0.00238	15.7934	0.0003615	15.7934		0.00409	15.3517	-2.64e-06	15.3517	0.00408	15.3517			0.00555	19.4198	-0.0015	19.4198	0.000154	19.4198		0.00405	12.9366	-0.00167	12.9366	0.00071	12.9366		0.00383	14.9426	-1.34e-05	14.9426	0.0038	14.9426
	0.00664	8.40335	-0.00796	8.40335	-0.00928	8.40335		0.00411	11.9658	-0.00135	11.9658	0.00141	11.9658		0.00513	15.7889	-0.00241	15.7889	0.0003041	15.7889		0.00411	15.3517	-2.86e-06	15.3517	0.0041	15.3517			0.00556	19.4247	-0.00158	19.4247	3.96e-05	19.4247		0.00407	12.9838	-0.00168	12.9838	0.000712	12.9838		0.00386	14.9935	-1.37e-05	14.9935	0.00383	14.9935
	0.00666	8.3852	-0.008	8.3852	-0.00934	8.3852		0.00412	12.0466	-0.00137	12.0466	0.00138	12.0466		0.00513	15.8321	-0.00243	15.8321	0.000263244	15.8321		0.00411	15.3798	-2.72e-06	15.3798	0.0041	15.3798			0.00559	19.4178	-0.00167	19.4178	-7.81e-05	19.4178		0.00407	13.0241	-0.00169	13.0241	0.000693	13.0241		0.00384	14.9917	-1.33e-05	14.9917	0.00381	14.9917
	0.00664	8.37585	-0.00804	8.37585	-0.00944	8.37585		0.00413	12.0477	-0.00139	12.0477	0.00135	12.0477		0.00515	15.8505	-0.00245	15.8505	0.000242695	15.8505		0.00412	15.3646	-2.39e-06	15.3646	0.00412	15.3646			0.00559	19.4057	-0.00176	19.4057	-0.000219	19.4057		0.00409	13.0491	-0.00169	13.0491	0.000713	13.0491		0.00386	15.0047	-1.34e-05	15.0047	0.00383	15.0047
	0.0067	8.40799	-0.00807	8.40799	-0.00944	8.40799		0.00415	12.0882	-0.0014	12.0882	0.00134	12.0882		0.00518	15.8687	-0.00248	15.8687	0.000229889	15.8687		0.00413	15.3778	-2.79e-06	15.3778	0.00412	15.3778			0.00559	19.3259	-0.00189	19.3259	-0.00041	19.3259		0.00409	13.0699	-0.0017	13.0699	0.000694	13.0699		0.00388	14.9982	-1.36e-05	14.9982	0.00385	14.9982
	0.00669	8.30642	-0.00812	8.30642	-0.00955	8.30642		0.00416	12.1317	-0.00142	12.1317	0.00132	12.1317		0.00518	15.9002	-0.0025	15.9002	0.000178189	15.9002		0.00413	15.4358	-2.68e-06	15.4358	0.00412	15.4358			0.00565	19.2958	-0.00202	19.2958	-0.000567	19.2958		0.00409	13.1059	-0.0017	13.1059	0.000694	13.1059		0.00388	15.1104	-1.34e-05	15.1104	0.00385	15.1104
	0.00672	8.22065	-0.00816	8.22065	-0.0096	8.22065		0.00415	12.1097	-0.00143	12.1097	0.00129	12.1097		0.00518	15.8781	-0.00254	15.8781	0.000109517	15.8781		0.00415	15.4687	-2.76e-06	15.4687	0.00414	15.4687			0.00565	19.1324	-0.00214	19.1324	-0.000759	19.1324		0.00411	13.1777	-0.00171	13.1777	0.000695	13.1777		0.0039	15.12	-1.35e-05	15.12	0.00387	15.12
	0.00675	8.25598	-0.00819	8.25598	-0.00963	8.25598		0.00419	12.123	-0.00144	12.123	0.0013	12.123		0.0052	15.9229	-0.00255	15.9229	9.00167e-05	15.9229		0.00415	15.4685	-2.49e-06	15.4685	0.00415	15.4685			0.00565	18.9158	-0.0024	18.9158	-0.00114	18.9158		0.00413	13.2134	-0.00172	13.2134	0.000696	13.2134		0.0039	15.185	-1.33e-05	15.185	0.00387	15.185
	0.00675	8.19673	-0.00823	8.19673	-0.00971	8.19673		0.00418	12.15	-0.00146	12.15	0.00126	12.15		0.00522	15.9102	-0.00257	15.9102	8.42334e-05	15.9102		0.00417	15.5049	-2.51e-06	15.5049	0.00416	15.5049			0.00567	18.7531	-0.00265	18.7531	-0.00151	18.7531		0.00413	13.2542	-0.00173	13.2542	0.000677	13.2542		0.00392	15.1935	-1.36e-05	15.1935	0.00389	15.1935
	0.00678	8.14128	-0.00826	8.14128	-0.00974	8.14128		0.0042	12.2169	-0.00147	12.2169	0.00125	12.2169		0.00522	15.9502	-0.0026	15.9502	1.50111e-05	15.9502		0.00417	15.5172	-2.68e-06	15.5172	0.00416	15.5172			0.00569	18.6382	-0.00284	18.6382	-0.00177	18.6382		0.00413	13.2694	-0.00172	13.2694	0.000696	13.2694		0.00392	15.242	-1.34e-05	15.242	0.00389	15.242
	0.00678	8.1545	-0.0083	8.1545	-0.00982	8.1545		0.00422	12.135	-0.00149	12.135	0.00124	12.135		0.00523	15.9717	-0.00262	15.9717	-1.655e-05	15.9717		0.00419	15.5031	-2.33e-06	15.5031	0.00419	15.5031			0.00569	18.5079	-0.00303	18.5079	-0.00206	18.5079		0.00415	13.2748	-0.00173	13.2748	0.000697	13.2748		0.00394	15.3089	-1.38e-05	15.3089	0.00391	15.3089
	0.00677	8.15415	-0.00834	8.15415	-0.00991	8.15415		0.00422	12.1494	-0.00151	12.1494	0.0012	12.1494		0.00527	15.9449	-0.00265	15.9449	-2.47334e-05	15.9449		0.00419	15.567	-2.51e-06	15.567	0.00418	15.567			0.00572	18.2409	-0.00326	18.2409	-0.00238	18.2409		0.00417	13.3103	-0.00174	13.3103	0.000698	13.3103		0.00393	15.3504	-1.38e-05	15.3504	0.0039	15.3504
	0.00682	8.16562	-0.00837	8.16562	-0.00992	8.16562		0.00424	12.2402	-0.00153	12.2402	0.00119	12.2402		0.00525	15.9956	-0.00268	15.9956	-0.000115122	15.9956		0.00421	15.5993	-2.59e-06	15.5993	0.0042	15.5993			0.00574	18.1373	-0.00349	18.1373	-0.00272	18.1373		0.00417	13.3026	-0.00174	13.3026	0.000698	13.3026		0.00395	15.4122	-1.35e-05	15.4122	0.00392	15.4122
	0.00682	8.08174	-0.0084	8.08174	-0.00998	8.08174		0.00424	12.2553	-0.00154	12.2553	0.00117	12.2553		0.00528	16.0198	-0.0027	16.0198	-0.000126817	16.0198		0.00421	15.5921	-2.59e-06	15.5921	0.0042	15.5921			0.00574	18.0278	-0.0037	18.0278	-0.00303	18.0278		0.00419	13.3618	-0.00175	13.3618	0.000699	13.3618		0.00396	15.44	-1.38e-05	15.44	0.00393	15.44
	0.00685	8.14526	-0.00844	8.14526	-0.01003	8.14526		0.00423	12.2271	-0.00156	12.2271	0.00112	12.2271		0.00527	16.0176	-0.00273	16.0176	-0.000187522	16.0176		0.00422	15.6308	-2.79e-06	15.6308	0.00421	15.6308			0.00573	17.9292	-0.00387	17.9292	-0.00328	17.9292		0.00418	13.4232	-0.00175	13.4232	0.000671	13.4232		0.00395	15.4797	-1.43e-05	15.4797	0.00392	15.4797
	0.00686	8.12349	-0.00847	8.12349	-0.01008	8.12349		0.00426	12.2877	-0.00157	12.2877	0.00113	12.2877		0.00529	16.0066	-0.00275	16.0066	-0.000214356	16.0066		0.00423	15.6428	-2.39e-06	15.6428	0.00423	15.6428			0.00576	17.8019	-0.00402	17.8019	-0.00349	17.8019		0.00419	13.5032	-0.00175	13.5032	0.000681	13.5032		0.00398	15.5627	-1.37e-05	15.5627	0.00395	15.5627
	0.00685	8.07775	-0.0085	8.07775	-0.01015	8.07775		0.00426	12.3101	-0.00158	12.3101	0.0011	12.3101		0.00532	16.0136	-0.00277	16.0136	-0.000223572	16.0136		0.00424	15.6278	-2.78e-06	15.6278	0.00423	15.6278			0.00577	17.7534	-0.00413	17.7534	-0.00366	17.7534		0.00421	13.5078	-0.00176	13.5078	0.000682	13.5078		0.00398	15.5665	-1.38e-05	15.5665	0.00395	15.5665
	0.00688	8.04887	-0.00852	8.04887	-0.01016	8.04887		0.00428	12.4019	-0.0016	12.4019	0.00109	12.4019		0.00532	16.0076	-0.00281	16.0076	-0.000291111	16.0076		0.00426	15.7346	-2.46e-06	15.7346	0.00426	15.7346			0.00578	17.7097	-0.00424	17.7097	-0.00381	17.7097		0.00422	13.5406	-0.00176	13.5406	0.000692	13.5406		0.00398	15.5754	-1.41e-05	15.5754	0.00395	15.5754
	0.00688	8.04638	-0.00856	8.04638	-0.01024	8.04638		0.00429	12.3396	-0.00162	12.3396	0.00106	12.3396		0.00532	16.0294	-0.00283	16.0294	-0.000346667	16.0294		0.00426	15.7229	-2.1e-06	15.7229	0.00426	15.7229			0.00577	17.7106	-0.00433	17.7106	-0.00394	17.7106		0.00422	13.5702	-0.00177	13.5702	0.000673	13.5702		0.00399	15.6541	-1.39e-05	15.6541	0.00396	15.6541
	0.00694	8.03581	-0.0086	8.03581	-0.01026	8.03581		0.00428	12.3303	-0.00163	12.3303	0.00102	12.3303		0.00535	16.0064	-0.00286	16.0064	-0.000372222	16.0064		0.00427	15.7625	-2.26e-06	15.7625	0.00427	15.7625			0.0058	17.6254	-0.0044	17.6254	-0.00404	17.6254		0.00423	13.578	-0.00178	13.578	0.000664	13.578		0.00401	15.6809	-1.41e-05	15.6809	0.00398	15.6809
	0.00691	7.98449	-0.00863	7.98449	-0.01035	7.98449		0.0043	12.3413	-0.00165	12.3413	0.001	12.3413		0.00537	15.9625	-0.00289	15.9625	-0.000407778	15.9625		0.00428	15.8276	-2.63e-06	15.8276	0.00427	15.8276			0.00583	17.6137	-0.00447	17.6137	-0.00412	17.6137		0.00426	13.5922	-0.00178	13.5922	0.000694	13.5922		0.00404	15.7151	-1.44e-05	15.7151	0.00401	15.7151
	0.00693	8.00743	-0.00867	8.00743	-0.01041	8.00743		0.0043	12.335	-0.00167	12.335	0.000963265	12.335		0.00537	15.9472	-0.00292	15.9472	-0.000463333	15.9472		0.0043	15.8742	-2.5e-06	15.8742	0.00429	15.8742			0.00584	17.5927	-0.00452	17.5927	-0.00421	17.5927		0.00425	13.6223	-0.00179	13.6223	0.000665	13.6223		0.00405	15.772	-1.4e-05	15.772	0.00402	15.772
	0.00694	8.00239	-0.00871	8.00239	-0.01048	8.00239		0.00434	12.3766	-0.00168	12.3766	0.000972653	12.3766		0.00539	15.8843	-0.00294	15.8843	-0.000498889	15.8843		0.0043	15.8715	-2.34e-06	15.8715	0.0043	15.8715			0.00585	17.5176	-0.00457	17.5176	-0.00427	17.5176		0.00427	13.6448	-0.00179	13.6448	0.000685	13.6448		0.00403	15.7543	-1.41e-05	15.7543	0.004	15.7543
	0.00701	8.08309	-0.00875	8.08309	-0.01049	8.08309		0.00432	12.3663	-0.0017	12.3663	0.000911837	12.3663		0.00539	15.7376	-0.00297	15.7376	-0.000554444	15.7376		0.00431	15.9108	-2.06e-06	15.9108	0.00431	15.9108			0.00585	17.5388	-0.00462	17.5388	-0.00434	17.5388		0.00428	13.6963	-0.0018	13.6963	0.000676	13.6963		0.00405	15.8115	-2.08e-05	15.8115	0.00401	15.8115
	0.00699	7.97433	-0.00877	7.97433	-0.01055	7.97433		0.00433	12.4666	-0.00172	12.4666	0.000891224	12.4666		0.00542	15.755	-0.003	15.755	-0.00058	15.755		0.00431	15.9342	-2.42e-06	15.9342	0.00431	15.9342			0.00587	17.5781	-0.00467	17.5781	-0.0044	17.5781		0.00428	13.7524	-0.0018	13.7524	0.000676	13.7524		0.00404	15.8324	-2.57e-05	15.8324	0.00399	15.8324
	0.00699	7.90163	-0.00881	7.90163	-0.01063	7.90163		0.00434	12.4492	-0.00173	12.4492	0.000870612	12.4492		0.00542	15.7195	-0.00303	15.7195	-0.000635555	15.7195		0.00433	16.0128	-2.25e-06	16.0128	0.00433	16.0128			0.00589	17.5904	-0.00471	17.5904	-0.00446	17.5904		0.0043	13.7795	-0.00181	13.7795	0.000677	13.7795		0.00406	15.8942	-3.14e-05	15.8942	0.004	15.8942
	0.00701	7.94253	-0.00885	7.94253	-0.01069	7.94253		0.00438	12.4727	-0.00176	12.4727	0.000869796	12.4727		0.00544	15.7063	-0.00306	15.7063	-0.000671111	15.7063		0.00435	16.036	-2.01e-06	16.036	0.00435	16.036			0.00588	17.5149	-0.00475	17.5149	-0.00452	17.5149		0.00432	13.7536	-0.00181	13.7536	0.000697	13.7536		0.00406	15.9003	-3.56e-05	15.9003	0.00399	15.9003
	0.00702	7.96337	-0.00889	7.96337	-0.01076	7.96337		0.00437	12.526	-0.00177	12.526	0.000829184	12.526		0.00544	15.7011	-0.00308	15.7011	-0.000726667	15.7011		0.00434	16.0442	-2.5e-06	16.0442	0.00433	16.0442			0.00589	17.5114	-0.0048	17.5114	-0.00459	17.5114		0.00432	13.7722	-0.00182	13.7722	0.000678	13.7722		0.00408	15.9212	-4.63e-05	15.9212	0.00399	15.9212
	0.00706	7.90079	-0.00892	7.90079	-0.01078	7.90079		0.00437	12.4689	-0.00179	12.4689	0.000788367	12.4689		0.00545	15.6799	-0.00311	15.6799	-0.000772222	15.6799		0.00436	16.061	-2.07e-06	16.061	0.00436	16.061			0.00592	17.5351	-0.00485	17.5351	-0.00465	17.5351		0.00432	13.7935	-0.00182	13.7935	0.000678	13.7935		0.00411	16.0092	-5.2e-05	16.0092	0.00401	16.0092
	0.00706	7.93388	-0.00895	7.93388	-0.01084	7.93388		0.00438	12.4267	-0.00181	12.4267	0.000757551	12.4267		0.00548	15.678	-0.00314	15.678	-0.000797778	15.678		0.00436	16.0998	-2.17e-06	16.0998	0.00436	16.0998			0.00591	17.5082	-0.00488	17.5082	-0.00471	17.5082		0.00432	13.8529	-0.00183	13.8529	0.00066	13.8529		0.0041	16.0072	-4.81e-05	16.0072	0.004	16.0072
	0.00709	7.95937	-0.00899	7.95937	-0.01089	7.95937		0.00439	12.4942	-0.00183	12.4942	0.000726735	12.4942		0.00548	15.6609	-0.00317	15.6609	-0.000853333	15.6609		0.00438	16.1026	-2.28e-06	16.1026	0.00438	16.1026			0.00596	17.5264	-0.00492	17.5264	-0.00475	17.5264		0.00434	13.8635	-0.00183	13.8635	0.00068	13.8635		0.00411	16.0743	-5.44e-05	16.0743	0.004	16.0743
	0.00709	7.96997	-0.00902	7.96997	-0.01095	7.96997		0.00441	12.4608	-0.00185	12.4608	0.000705918	12.4608		0.0055	15.6696	-0.00319	15.6696	-0.000888889	15.6696		0.00438	16.1136	-2.09e-06	16.1136	0.00438	16.1136			0.00598	17.5581	-0.00496	17.5581	-0.0048	17.5581		0.00436	13.8753	-0.00183	13.8753	0.0007	13.8753		0.00412	16.0802	-6.15e-05	16.0802	0.004	16.0802
	0.00712	7.8592	-0.00905	7.8592	-0.01098	7.8592		0.00441	12.4921	-0.00187	12.4921	0.000665102	12.4921		0.0055	15.6549	-0.00322	15.6549	-0.000944444	15.6549		0.0044	16.1564	-1.91e-06	16.1564	0.0044	16.1564			0.00596	17.547	-0.00501	17.547	-0.00486	17.547		0.00437	13.8792	-0.00184	13.8792	0.000691	13.8792		0.00414	16.1245	-7.38e-05	16.1245	0.00399	16.1245
	0.00712	7.90269	-0.00907	7.90269	-0.01102	7.90269		0.00443	12.5237	-0.00189	12.5237	0.00065449	12.5237		0.00551	15.6496	-0.00325	15.6496	-0.00099	15.6496		0.0044	16.1319	-2.09e-06	16.1319	0.0044	16.1319			0.00602	17.5245	-0.00505	17.5245	-0.0049	17.5245		0.00438	13.9419	-0.00184	13.9419	0.000701	13.9419		0.00414	16.1588	-6.59e-05	16.1588	0.00401	16.1588
	0.00717	7.91812	-0.0091	7.91812	-0.01103	7.91812		0.00443	12.5489	-0.0019	12.5489	0.000623878	12.5489		0.00554	15.5531	-0.00328	15.5531	-0.00102	15.5531		0.00441	16.1618	-2.11e-06	16.1618	0.00441	16.1618			0.00602	17.5242	-0.00508	17.5242	-0.00496	17.5242		0.00438	13.9742	-0.00185	13.9742	0.000682	13.9742		0.00415	16.2071	-7.28e-05	16.2071	0.004	16.2071
	0.00717	7.88357	-0.00914	7.88357	-0.01111	7.88357		0.00445	12.4768	-0.00193	12.4768	0.000592857	12.4768		0.00553	15.5322	-0.00331	15.5322	-0.00108	15.5322		0.00443	16.2049	-2.04e-06	16.2049	0.00443	16.2049			0.00602	17.5551	-0.00512	17.5551	-0.00501	17.5551		0.00439	13.9822	-0.00185	13.9822	0.000692	13.9822		0.00416	16.2302	-8.13e-05	16.2302	0.004	16.2302
	0.00717	7.82521	-0.00917	7.82521	-0.01117	7.82521		0.00445	12.467	-0.00195	12.467	0.000552041	12.467		0.00555	15.4254	-0.00333	15.4254	-0.00112	15.4254		0.00443	16.2333	-1.65e-06	16.2333	0.00443	16.2333			0.006	17.5657	-0.00515	17.5657	-0.00507	17.5657		0.00439	14.0293	-0.00186	14.0293	0.000673	14.0293		0.00417	16.2605	-7.93e-05	16.2605	0.00401	16.2605
	0.00715	7.8301	-0.0092	7.8301	-0.01125	7.8301		0.00448	12.4348	-0.00197	12.4348	0.000541224	12.4348		0.00555	15.3749	-0.00336	15.3749	-0.00117	15.3749		0.00445	16.308	-2.02e-06	16.308	0.00445	16.308			0.00606	17.5551	-0.00519	17.5551	-0.00509	17.5551		0.00441	14.0531	-0.00186	14.0531	0.000693	14.0531		0.00417	16.2825	-8.94e-05	16.2825	0.00399	16.2825
	0.0072	7.80813	-0.00923	7.80813	-0.01126	7.80813		0.00448	12.5756	-0.00199	12.5756	0.000500408	12.5756		0.00558	15.2889	-0.00339	15.2889	-0.0012	15.2889		0.00445	16.2548	-2.34e-06	16.2548	0.00445	16.2548			0.00605	17.6298	-0.00522	17.6298	-0.00515	17.6298		0.00443	14.0814	-0.00187	14.0814	0.000694	14.0814		0.00419	16.3851	-9.73e-05	16.3851	0.004	16.3851
	0.0072	7.7726	-0.00927	7.7726	-0.01134	7.7726		0.00448	12.4649	-0.00202	12.4649	0.000449388	12.4649		0.0056	15.0903	-0.00342	15.0903	-0.00123	15.0903		0.00447	16.3084	-2.54e-06	16.3084	0.00446	16.3084			0.00607	17.6201	-0.00525	17.6201	-0.00518	17.6201		0.00443	14.1	-0.00187	14.1	0.000694	14.1		0.00418	16.3873	-0.000104	16.3873	0.00397	16.3873
	0.00723	7.73589	-0.00931	7.73589	-0.01139	7.73589		0.00447	12.5034	-0.00204	12.5034	0.000398572	12.5034		0.00558	15.0314	-0.00344	15.0314	-0.00131	15.0314		0.00447	16.3272	-1.92e-06	16.3272	0.00447	16.3272			0.00609	17.6136	-0.00529	17.6136	-0.00523	17.6136		0.00444	14.1172	-0.00188	14.1172	0.000685	14.1172		0.00419	16.4061	-0.00011	16.4061	0.00397	16.4061
	0.00725	7.75394	-0.00934	7.75394	-0.01143	7.75394		0.0045	12.4216	-0.00205	12.4216	0.000397959	12.4216		0.00559	14.996	-0.00347	14.996	-0.00135	14.996		0.00447	16.3632	-1.77e-06	16.3632	0.00447	16.3632			0.0061	17.6159	-0.00531	17.6159	-0.00526	17.6159		0.00445	14.1784	-0.00188	14.1784	0.000695	14.1784		0.0042	16.441	-0.000109	16.441	0.00398	16.441
	0.00728	7.69907	-0.00938	7.69907	-0.01148	7.69907		0.0045	12.5229	-0.00207	12.5229	0.000367347	12.5229		0.00563	14.9735	-0.00353	14.9735	-0.00143	14.9735		0.00451	16.3702	-2.1e-06	16.3702	0.00451	16.3702			0.00613	17.6548	-0.00533	17.6548	-0.00529	17.6548		0.00445	14.2005	-0.00189	14.2005	0.000676	14.2005		0.00421	16.4738	-0.000119	16.4738	0.00397	16.4738
	0.00731	7.69724	-0.00941	7.69724	-0.01151	7.69724		0.00452	12.5183	-0.00209	12.5183	0.000336327	12.5183		0.00564	14.9734	-0.00356	14.9734	-0.00147	14.9734		0.00451	16.429	-2.21e-06	16.429	0.00451	16.429			0.00613	17.709	-0.00537	17.709	-0.00534	17.709		0.00448	14.2271	-0.0019	14.2271	0.000688	14.2271		0.00423	16.5081	-0.000128	16.5081	0.00397	16.5081
	0.00728	7.66792	-0.00944	7.66792	-0.0116	7.66792		0.00453	12.5051	-0.00211	12.5051	0.000315714	12.5051		0.00565	14.957	-0.00358	14.957	-0.00152	14.957		0.00452	16.4103	-2.25e-06	16.4103	0.00452	16.4103			0.00613	17.7045	-0.0054	17.7045	-0.00537	17.7045		0.00448	14.2765	-0.0019	14.2765	0.000688	14.2765		0.00425	16.5365	-0.000135	16.5365	0.00398	16.5365
	0.00731	7.67138	-0.00948	7.67138	-0.01165	7.67138		0.00455	12.5915	-0.00212	12.5915	0.000305102	12.5915		0.00566	14.9408	-0.00361	14.9408	-0.00156	14.9408		0.00453	16.4411	-1.97e-06	16.4411	0.00453	16.4411			0.00614	17.7226	-0.00542	17.7226	-0.00541	17.7226		0.00449	14.33	-0.00191	14.33	0.000679	14.33		0.00423	16.539	-0.000144	16.539	0.00394	16.539
	0.00733	7.67665	-0.00951	7.67665	-0.01169	7.67665		0.00457	12.6066	-0.00214	12.6066	0.00029449	12.6066		0.00569	14.9462	-0.00364	14.9462	-0.00159	14.9462		0.00454	16.4725	-1.76e-06	16.4725	0.00454	16.4725			0.00617	17.7118	-0.00544	17.7118	-0.00544	17.7118		0.0045	14.3334	-0.00191	14.3334	0.000689	14.3334		0.00425	16.6406	-0.000156	16.6406	0.00394	16.6406
	0.00736	7.68395	-0.00954	7.68395	-0.01172	7.68395		0.00455	12.6653	-0.00216	12.6653	0.000233673	12.6653		0.00568	14.8728	-0.00369	14.8728	-0.00171	14.8728		0.00455	16.4971	-2.02e-06	16.4971	0.00455	16.4971			0.00617	17.7316	-0.00547	17.7316	-0.00547	17.7316		0.0045	14.3884	-0.00192	14.3884	0.00067	14.3884		0.00426	16.6638	-0.000162	16.6638	0.00394	16.6638
	0.00738	7.73225	-0.00957	7.73225	-0.01176	7.73225		0.00457	12.6749	-0.00217	12.6749	0.000223061	12.6749		0.00569	14.8671	-0.00372	14.8671	-0.00175	14.8671		0.00456	16.5007	-2.13e-06	16.5007	0.00456	16.5007			0.00618	17.7874	-0.0055	17.7874	-0.00551	17.7874		0.00451	14.42	-0.00192	14.42	0.00068	14.42		0.00425	16.6461	-0.000172	16.6461	0.00391	16.6461
	0.00739	7.73789	-0.0096	7.73789	-0.01181	7.73789		0.00458	12.7034	-0.00219	12.7034	0.000192245	12.7034		0.00571	14.8189	-0.00378	14.8189	-0.00185	14.8189		0.00455	16.542	-2.13e-06	16.542	0.00455	16.542			0.00621	17.8136	-0.00552	17.8136	-0.00554	17.8136		0.00453	14.4345	-0.00192	14.4345	0.000681	14.4345		0.00428	16.6668	-0.000181	16.6668	0.00392	16.6668
	0.00739	7.66422	-0.00963	7.66422	-0.01187	7.66422		0.0046	12.6955	-0.00221	12.6955	0.000171429	12.6955		0.00571	14.7784	-0.00381	14.7784	-0.0019	14.7784		0.00456	16.5591	-2.49e-06	16.5591	0.00456	16.5591			0.0062	17.7883	-0.00556	17.7883	-0.00558	17.7883		0.00453	14.4669	-0.00192	14.4669	0.000681	14.4669		0.00429	16.7036	-0.000194	16.7036	0.0039	16.7036
	0.00742	7.66972	-0.00967	7.66972	-0.01192	7.66972		0.00461	12.651	-0.00223	12.651	0.000140612	12.651		0.00574	14.7536	-0.00383	14.7536	-0.00193	14.7536		0.00458	16.5502	-2.42e-06	16.5502	0.00458	16.5502			0.00624	17.8105	-0.00558	17.8105	-0.00561	17.8105		0.00453	14.5154	-0.00193	14.5154	0.000662	14.5154		0.0043	16.7466	-0.000196	16.7466	0.00391	16.7466
	0.00742	7.71344	-0.0097	7.71344	-0.01198	7.71344		0.00462	12.7198	-0.00226	12.7198	0.000109796	12.7198		0.00576	14.7086	-0.00389	14.7086	-0.00202	14.7086		0.00459	16.5916	-2.29e-06	16.5916	0.00459	16.5916			0.00625	17.8524	-0.00561	17.8524	-0.00564	17.8524		0.00456	14.5066	-0.00194	14.5066	0.000673	14.5066		0.0043	16.7828	-0.00021	16.7828	0.00388	16.7828
	0.00742	7.67675	-0.00974	7.67675	-0.01206	7.67675		0.00462	12.7358	-0.00228	12.7358	6.89795e-05	12.7358		0.00574	14.6876	-0.00392	14.6876	-0.00209	14.6876		0.00459	16.6014	-2.22e-06	16.6014	0.00459	16.6014			0.00625	17.8292	-0.00564	17.8292	-0.00569	17.8292		0.00456	14.5732	-0.00194	14.5732	0.000673	14.5732		0.00431	16.8577	-0.000211	16.8577	0.00389	16.8577
	0.00746	7.65388	-0.00976	7.65388	-0.01206	7.65388		0.00464	12.7034	-0.0023	12.7034	3.79593e-05	12.7034		0.00576	14.6638	-0.00394	14.6638	-0.00213	14.6638		0.0046	16.6214	-2.36e-06	16.6214	0.0046	16.6214			0.00625	17.7993	-0.00567	17.7993	-0.00573	17.7993		0.00457	14.6157	-0.00195	14.6157	0.000664	14.6157		0.00432	16.9086	-0.000222	16.9086	0.00388	16.9086
	0.00747	7.60216	-0.00979	7.60216	-0.01211	7.60216		0.00464	12.7522	-0.00232	12.7522	7.34694e-06	12.7522		0.00578	14.619	-0.00397	14.619	-0.00216	14.619		0.00462	16.5953	-2.08e-06	16.5953	0.00462	16.5953			0.00629	17.8185	-0.00571	17.8185	-0.00576	17.8185		0.00459	14.6921	-0.00195	14.6921	0.000684	14.6921		0.00434	16.9803	-0.000231	16.9803	0.00388	16.9803
	0.00749	7.56959	-0.00981	7.56959	-0.01213	7.56959		0.00464	12.7999	-0.00234	12.7999	-3.34695e-05	12.7999		0.00579	14.624	-0.004	14.624	-0.00221	14.624		0.00462	16.6538	-1.86e-06	16.6538	0.00462	16.6538			0.00631	17.7979	-0.00574	17.7979	-0.0058	17.7979		0.00458	14.7209	-0.00196	14.7209	0.000655	14.7209		0.00435	17.0038	-0.000236	17.0038	0.00388	17.0038
	0.0075	7.58598	-0.00984	7.58598	-0.01218	7.58598		0.00466	12.7381	-0.00236	12.7381	-5.42858e-05	12.7381		0.00581	14.5651	-0.00403	14.5651	-0.00225	14.5651		0.00464	16.6291	-2.68e-06	16.6291	0.00463	16.6291			0.00631	17.8048	-0.00577	17.8048	-0.00585	17.8048		0.0046	14.7307	-0.00197	14.7307	0.000657	14.7307		0.00435	17.0584	-0.000244	17.0584	0.00386	17.0584
	0.0075	7.61931	-0.00986	7.61931	-0.01222	7.61931		0.00467	12.7922	-0.00238	12.7922	-8.5102e-05	12.7922		0.00581	14.5125	-0.00406	14.5125	-0.0023	14.5125		0.00464	16.6683	-3.18e-06	16.6683	0.00463	16.6683			0.00631	17.8101	-0.0058	17.8101	-0.0059	17.8101		0.00461	14.7245	-0.00197	14.7245	0.000667	14.7245		0.00435	17.1196	-0.000253	17.1196	0.00384	17.1196
	0.00754	7.5518	-0.00989	7.5518	-0.01224	7.5518		0.00468	12.7852	-0.00239	12.7852	-0.000105714	12.7852		0.00584	14.507	-0.00411	14.507	-0.00238	14.507		0.00466	16.6731	-3.58e-06	16.6731	0.00465	16.6731			0.00633	17.7515	-0.00583	17.7515	-0.00593	17.7515		0.00462	14.8033	-0.00198	14.8033	0.000658	14.8033		0.00436	17.1911	-0.00026	17.1911	0.00384	17.1911
	0.00755	7.63754	-0.00991	7.63754	-0.01227	7.63754		0.00469	12.8478	-0.00241	12.8478	-0.000136531	12.8478		0.00585	14.4438	-0.00414	14.4438	-0.00243	14.4438		0.00467	16.7211	-5.29e-06	16.7211	0.00466	16.7211			0.00635	17.7509	-0.00587	17.7509	-0.00598	17.7509		0.00464	14.8059	-0.00198	14.8059	0.000678	14.8059		0.00439	17.211	-0.000273	17.211	0.00384	17.211
	0.00754	7.52372	-0.00994	7.52372	-0.01234	7.52372		0.00469	12.7814	-0.00243	12.7814	-0.000177347	12.7814		0.00585	14.4019	-0.00417	14.4019	-0.00248	14.4019		0.00466	16.6974	-6.32e-06	16.6974	0.00465	16.6974			0.00636	17.7867	-0.0059	17.7867	-0.00604	17.7867		0.00464	14.8637	-0.00199	14.8637	0.000659	14.8637		0.00439	17.2289	-0.000278	17.2289	0.00383	17.2289
	0.00757	7.54688	-0.00997	7.54688	-0.01237	7.54688		0.00471	12.8665	-0.00245	12.8665	-0.000187959	12.8665		0.00587	14.3584	-0.00422	14.3584	-0.00257	14.3584		0.00469	16.6892	-7.7e-06	16.6892	0.00467	16.6892			0.00637	17.7213	-0.00594	17.7213	-0.00608	17.7213		0.00466	14.885	-0.002	14.885	0.00066	14.885		0.00438	17.2406	-0.000286	17.2406	0.00381	17.2406
	0.00758	7.54936	-0.01001	7.54936	-0.01244	7.54936		0.00472	12.8773	-0.00247	12.8773	-0.000218776	12.8773		0.00587	14.2873	-0.00425	14.2873	-0.00263	14.2873		0.0047	16.7083	-8.01e-06	16.7083	0.00468	16.7083			0.00639	17.7125	-0.00598	17.7125	-0.00614	17.7125		0.00466	14.9266	-0.002	14.9266	0.00066	14.9266		0.00441	17.2692	-0.000293	17.2692	0.00382	17.2692
	0.00762	7.58641	-0.01004	7.58641	-0.01246	7.58641		0.00471	12.9015	-0.00248	12.9015	-0.000259388	12.9015		0.00589	14.3005	-0.00431	14.3005	-0.00272	14.3005		0.00472	16.7538	-1.08e-05	16.7538	0.0047	16.7538			0.0064	17.7029	-0.00603	17.7029	-0.0062	17.7029		0.00468	14.9403	-0.00201	14.9403	0.000661	14.9403		0.00442	17.3083	-0.000307	17.3083	0.00381	17.3083
	0.00762	7.5071	-0.01008	7.5071	-0.01254	7.5071		0.00473	12.9079	-0.00251	12.9079	-0.000290408	12.9079		0.0059	14.2543	-0.00433	14.2543	-0.00277	14.2543		0.00471	16.7638	-1.17e-05	16.7638	0.00469	16.7638			0.00642	17.5858	-0.00607	17.5858	-0.00625	17.5858		0.00468	15.0058	-0.00201	15.0058	0.000661	15.0058		0.00441	17.3233	-0.000317	17.3233	0.00378	17.3233
	0.00765	7.46903	-0.01011	7.46903	-0.01257	7.46903		0.00474	12.8536	-0.00253	12.8536	-0.000321225	12.8536		0.00592	14.2218	-0.00436	14.2218	-0.0028	14.2218		0.00471	16.7047	-1.25e-05	16.7047	0.00469	16.7047			0.00643	17.3495	-0.00617	17.3495	-0.00639	17.3495		0.00468	15.0385	-0.00202	15.0385	0.000642	15.0385		0.00444	17.4018	-0.000324	17.4018	0.00379	17.4018
	0.00765	7.48208	-0.01014	7.48208	-0.01263	7.48208		0.00476	12.8431	-0.00255	12.8431	-0.000342041	12.8431		0.00592	14.2083	-0.00442	14.2083	-0.00291	14.2083		0.00474	16.7854	-1.58e-05	16.7854	0.00471	16.7854			0.00646	17.2616	-0.00627	17.2616	-0.00654	17.2616		0.00471	15.1012	-0.00203	15.1012	0.000653	15.1012		0.00444	17.4364	-0.000342	17.4364	0.00376	17.4364
	0.00768	7.52166	-0.01018	7.52166	-0.01268	7.52166		0.00476	12.8751	-0.00258	12.8751	-0.000403265	12.8751		0.00592	14.1564	-0.00447	14.1564	-0.00302	14.1564		0.00474	16.7809	-1.78e-05	16.7809	0.0047	16.7809			0.00646	17.1935	-0.00637	17.1935	-0.00667	17.1935		0.0047	15.1274	-0.00203	15.1274	0.000643	15.1274		0.00446	17.4577	-0.000339	17.4577	0.00378	17.4577
	0.0077	7.52213	-0.01021	7.52213	-0.01272	7.52213		0.00478	12.8644	-0.00261	12.8644	-0.00044449	12.8644		0.00595	14.1218	-0.0045	14.1218	-0.00305	14.1218		0.00475	16.828	-1.83e-05	16.828	0.00471	16.828			0.00647	17.128	-0.00644	17.128	-0.00678	17.128		0.00472	15.1803	-0.00204	15.1803	0.000645	15.1803		0.00447	17.4404	-0.000346	17.4404	0.00378	17.4404
	0.0077	7.49633	-0.01024	7.49633	-0.01278	7.49633		0.00478	12.9036	-0.00264	12.9036	-0.00049551	12.9036		0.00596	14.0935	-0.00456	14.0935	-0.00315	14.0935		0.00476	16.8439	-2.04e-05	16.8439	0.00472	16.8439			0.00646	17.0597	-0.00651	17.0597	-0.00688	17.0597		0.00473	15.2047	-0.00205	15.2047	0.000636	15.2047		0.00448	17.5218	-0.000353	17.5218	0.00377	17.5218
	0.00773	7.49281	-0.01027	7.49281	-0.01281	7.49281		0.0048	12.959	-0.00266	12.959	-0.000516327	12.959		0.00597	14.0568	-0.00458	14.0568	-0.0032	14.0568		0.00478	16.8548	-2.26e-05	16.8548	0.00473	16.8548			0.00648	17.0679	-0.00656	17.0679	-0.00696	17.0679		0.00473	15.2554	-0.00205	15.2554	0.000636	15.2554		0.00448	17.5454	-0.000362	17.5454	0.00376	17.5454
	0.00771	7.45708	-0.0103	7.45708	-0.01289	7.45708		0.00481	12.9785	-0.00268	12.9785	-0.000547143	12.9785		0.00599	13.9667	-0.00464	13.9667	-0.00329	13.9667		0.00479	16.8729	-2.26e-05	16.8729	0.00474	16.8729			0.00653	17.0329	-0.00662	17.0329	-0.00702	17.0329		0.00475	15.2548	-0.00206	15.2548	0.000637	15.2548		0.00449	17.5922	-0.000373	17.5922	0.00374	17.5922
	0.00773	7.46988	-0.01034	7.46988	-0.01295	7.46988		0.00481	12.9895	-0.0027	12.9895	-0.000587959	12.9895		0.006	13.9295	-0.00467	13.9295	-0.00333	13.9295		0.00479	16.8584	-2.39e-05	16.8584	0.00474	16.8584			0.0065	17.0548	-0.00668	17.0548	-0.00712	17.0548		0.00474	15.301	-0.00207	15.301	0.000608	15.301		0.0045	17.5916	-0.000379	17.5916	0.00374	17.5916
	0.00778	7.53991	-0.01036	7.53991	-0.01294	7.53991		0.00483	13.033	-0.00272	13.033	-0.000608775	13.033		0.006	13.8898	-0.00469	13.8898	-0.00339	13.8898		0.0048	16.8862	-2.6e-05	16.8862	0.00475	16.8862			0.00653	16.9443	-0.00673	16.9443	-0.00718	16.9443		0.00477	15.3405	-0.00207	15.3405	0.000638	15.3405		0.0045	17.6634	-0.00039	17.6634	0.00372	17.6634
	0.00778	7.41063	-0.01039	7.41063	-0.013	7.41063		0.00482	13.0281	-0.00274	13.0281	-0.000669796	13.0281		0.00602	13.8183	-0.00472	13.8183	-0.00342	13.8183		0.00483	16.8994	-2.68e-05	16.8994	0.00478	16.8994			0.00653	17.0133	-0.00679	17.0133	-0.00726	17.0133		0.00477	15.3901	-0.00208	15.3901	0.000619	15.3901		0.00452	17.704	-0.000399	17.704	0.00372	17.704
	0.00778	7.48112	-0.01041	7.48112	-0.01304	7.48112		0.00483	12.9945	-0.00277	12.9945	-0.000700612	12.9945		0.00605	13.8017	-0.00475	13.8017	-0.00345	13.8017		0.00483	16.8998	-2.91e-05	16.8998	0.00477	16.8998			0.00655	16.943	-0.00684	16.943	-0.00734	16.943		0.00479	15.363	-0.00208	15.363	0.000639	15.363		0.00452	17.7434	-0.000409	17.7434	0.0037	17.7434
	0.00779	7.52137	-0.01044	7.52137	-0.01309	7.52137		0.00486	13.0334	-0.00279	13.0334	-0.000721633	13.0334		0.00605	13.7165	-0.00481	13.7165	-0.00356	13.7165		0.00483	16.9264	-2.97e-05	16.9264	0.00477	16.9264			0.00658	16.7554	-0.00695	16.7554	-0.00749	16.7554		0.00479	15.4295	-0.00208	15.4295	0.00062	15.4295		0.00454	17.7827	-0.000414	17.7827	0.00371	17.7827
	0.00784	7.52491	-0.01047	7.52491	-0.0131	7.52491		0.00486	13.0207	-0.00281	13.0207	-0.000762449	13.0207		0.00606	13.6238	-0.00483	13.6238	-0.00361	13.6238		0.00484	16.9448	-3.2e-05	16.9448	0.00478	16.9448			0.00658	16.6353	-0.00706	16.6353	-0.00764	16.6353		0.0048	15.431	-0.00209	15.431	0.000611	15.431		0.00454	17.8115	-0.000421	17.8115	0.0037	17.8115
	0.00784	7.50525	-0.01049	7.50525	-0.01314	7.50525		0.00486	12.9986	-0.00284	12.9986	-0.000813469	12.9986		0.00607	13.5503	-0.00486	13.5503	-0.00365	13.5503		0.00485	16.969	-3.38e-05	16.969	0.00478	16.969			0.00659	16.4602	-0.00714	16.4602	-0.00776	16.4602		0.00481	15.5233	-0.00209	15.5233	0.000621	15.5233		0.00454	17.8547	-0.00043	17.8547	0.00368	17.8547
	0.00784	7.48485	-0.01052	7.48485	-0.0132	7.48485		0.00487	13.0878	-0.00286	13.0878	-0.000844286	13.0878		0.00609	13.4877	-0.00489	13.4877	-0.00369	13.4877		0.00487	16.9667	-3.44e-05	16.9667	0.0048	16.9667			0.00661	16.4304	-0.00721	16.4304	-0.00785	16.4304		0.00481	15.5292	-0.0021	15.5292	0.000602	15.5292		0.00456	17.8731	-0.000436	17.8731	0.00369	17.8731
	0.00787	7.50752	-0.01055	7.50752	-0.01323	7.50752		0.0049	13.021	-0.00288	13.021	-0.000855102	13.021		0.00609	13.4434	-0.00492	13.4434	-0.00374	13.4434		0.00487	16.9663	-3.58e-05	16.9663	0.0048	16.9663			0.00662	16.4102	-0.00726	16.4102	-0.00793	16.4102		0.00483	15.5535	-0.0021	15.5535	0.000622	15.5535		0.00456	17.8956	-0.000441	17.8956	0.00368	17.8956
	0.00789	7.44361	-0.01059	7.44361	-0.01329	7.44361		0.0049	13.0948	-0.0029	13.0948	-0.000906122	13.0948		0.00611	13.357	-0.00497	13.357	-0.00383	13.357		0.00488	17.0262	-3.63e-05	17.0262	0.00481	17.0262			0.00664	16.3994	-0.00732	16.3994	-0.00801	16.3994		0.00483	15.5182	-0.0021	15.5182	0.000622	15.5182		0.00457	17.9274	-0.000453	17.9274	0.00366	17.9274
	0.0079	7.43457	-0.01062	7.43457	-0.01334	7.43457		0.0049	13.0867	-0.00293	13.0867	-0.000957143	13.0867		0.00611	13.3312	-0.005	13.3312	-0.00389	13.3312		0.0049	17.0284	-3.86e-05	17.0284	0.00482	17.0284			0.00665	16.4137	-0.00736	16.4137	-0.00806	16.4137		0.00485	15.4401	-0.0021	15.4401	0.000642	15.4401		0.00459	17.9431	-0.000464	17.9431	0.00366	17.9431
	0.00792	7.45536	-0.01065	7.45536	-0.01338	7.45536		0.00492	13.153	-0.00295	13.153	-0.000977959	13.153		0.00614	13.2879	-0.00503	13.2879	-0.00392	13.2879		0.0049	17.0562	-4.01e-05	17.0562	0.00482	17.0562			0.00665	16.3488	-0.0074	16.3488	-0.00812	16.3488		0.00486	15.4367	-0.0021	15.4367	0.000652	15.4367		0.0046	18.0266	-0.000477	18.0266	0.00365	18.0266
	0.00794	7.47257	-0.01068	7.47257	-0.01342	7.47257		0.00493	13.1081	-0.00297	13.1081	-0.00102	13.1081		0.00614	13.2654	-0.00508	13.2654	-0.00403	13.2654		0.0049	17.0429	-4.29e-05	17.0429	0.00481	17.0429			0.00669	16.3409	-0.00744	16.3409	-0.00816	16.3409		0.00487	15.4518	-0.0021	15.4518	0.000662	15.4518		0.0046	18.0541	-0.000489	18.0541	0.00362	18.0541
	0.00795	7.37951	-0.0107	7.37951	-0.01345	7.37951		0.00494	13.0892	-0.00299	13.0892	-0.00104	13.0892		0.00616	13.2586	-0.00511	13.2586	-0.00406	13.2586		0.00492	17.0868	-4.54e-05	17.0868	0.00483	17.0868			0.00666	16.3756	-0.00747	16.3756	-0.00822	16.3756		0.00488	15.4849	-0.00211	15.4849	0.000654	15.4849		0.00461	18.0589	-0.000497	18.0589	0.00362	18.0589
	0.00795	7.38388	-0.01073	7.38388	-0.01351	7.38388		0.00495	13.1339	-0.00302	13.1339	-0.00108	13.1339		0.00617	13.205	-0.00514	13.205	-0.00411	13.205		0.00492	17.0764	-4.7e-05	17.0764	0.00483	17.0764			0.0067	16.3472	-0.0075	16.3472	-0.00825	16.3472		0.00489	15.5462	-0.00211	15.5462	0.000664	15.5462		0.00462	18.0892	-0.000508	18.0892	0.0036	18.0892
	0.00798	7.30709	-0.01076	7.30709	-0.01354	7.30709		0.00496	13.1197	-0.00304	13.1197	-0.00112	13.1197		0.00619	13.1682	-0.00519	13.1682	-0.0042	13.1682		0.00493	17.1139	-4.94e-05	17.1139	0.00483	17.1139			0.00672	16.3559	-0.00753	16.3559	-0.00829	16.3559		0.0049	15.5846	-0.00211	15.5846	0.000674	15.5846		0.00464	18.1271	-0.000518	18.1271	0.0036	18.1271
	0.00802	7.41345	-0.0108	7.41345	-0.01358	7.41345		0.00497	13.1519	-0.00307	13.1519	-0.00116	13.1519		0.00619	13.1404	-0.00522	13.1404	-0.00425	13.1404		0.00494	17.0986	-5.11e-05	17.0986	0.00484	17.0986			0.00673	16.4208	-0.00756	16.4208	-0.00834	16.4208		0.0049	15.6109	-0.00212	15.6109	0.000655	15.6109		0.00465	18.1663	-0.000528	18.1663	0.00359	18.1663
	0.00798	7.35865	-0.01083	7.35865	-0.01368	7.35865		0.00497	13.094	-0.00309	13.094	-0.0012	13.094		0.00621	13.0887	-0.00525	13.0887	-0.00429	13.0887		0.00494	17.1099	-5.21e-05	17.1099	0.00484	17.1099			0.00675	16.4026	-0.0076	16.4026	-0.00836	16.4026		0.00492	15.6729	-0.00212	15.6729	0.000675	15.6729		0.00465	18.169	-0.000532	18.169	0.00359	18.169
	0.00802	7.36263	-0.01087	7.36263	-0.01372	7.36263		0.00499	13.1289	-0.00311	13.1289	-0.00123	13.1289		0.00621	13.0564	-0.00528	13.0564	-0.00435	13.0564		0.00498	17.126	-5.43e-05	17.126	0.00487	17.126			0.00676	16.4173	-0.00762	16.4173	-0.00841	16.4173		0.00494	15.7083	-0.00213	15.7083	0.000676	15.7083		0.00465	18.2039	-0.000543	18.2039	0.00356	18.2039
	0.00803	7.33916	-0.0109	7.33916	-0.01377	7.33916		0.00501	13.1615	-0.00313	13.1615	-0.00126	13.1615		0.00622	13.0014	-0.00533	13.0014	-0.00445	13.0014		0.00497	17.1385	-5.56e-05	17.1385	0.00486	17.1385			0.00676	16.4229	-0.00764	16.4229	-0.00844	16.4229		0.00494	15.726	-0.00213	15.726	0.000676	15.726		0.00466	18.2531	-0.000557	18.2531	0.00355	18.2531
	0.00806	7.31817	-0.01094	7.31817	-0.01382	7.31817		0.00499	13.1916	-0.00315	13.1916	-0.00132	13.1916		0.00623	12.9472	-0.00536	12.9472	-0.00449	12.9472		0.00499	17.1512	-5.63e-05	17.1512	0.00488	17.1512			0.00679	16.4391	-0.00767	16.4391	-0.00846	16.4391		0.00496	15.7601	-0.00214	15.7601	0.000677	15.7601		0.00469	18.3001	-0.000563	18.3001	0.00356	18.3001
	0.00806	7.23182	-0.01098	7.23182	-0.0139	7.23182		0.00501	13.2528	-0.00318	13.2528	-0.00135	13.2528		0.00627	12.9213	-0.00539	12.9213	-0.00451	12.9213		0.005	17.1798	-5.81e-05	17.1798	0.00488	17.1798			0.00679	16.4814	-0.0077	16.4814	-0.00851	16.4814		0.00495	15.83	-0.00214	15.83	0.000667	15.83		0.0047	18.2859	-0.000575	18.2859	0.00355	18.2859
	0.00806	7.30078	-0.01101	7.30078	-0.01396	7.30078		0.00502	13.1724	-0.0032	13.1724	-0.00138	13.1724		0.00627	12.9189	-0.00544	12.9189	-0.00462	12.9189		0.00501	17.1661	-6.09e-05	17.1661	0.00489	17.1661			0.00679	16.5224	-0.00772	16.5224	-0.00854	16.5224		0.00496	15.7985	-0.00215	15.7985	0.000658	15.7985		0.0047	18.3446	-0.000584	18.3446	0.00353	18.3446
	0.0081	7.25124	-0.01104	7.25124	-0.01398	7.25124		0.00504	13.1866	-0.00322	13.1866	-0.0014	13.1866		0.00627	12.8816	-0.0055	12.8816	-0.00473	12.8816		0.005	17.2095	-6.37e-05	17.2095	0.00487	17.2095			0.00681	16.56	-0.00775	16.56	-0.00857	16.56		0.00498	15.8962	-0.00215	15.8962	0.000678	15.8962		0.00472	18.3505	-0.000589	18.3505	0.00354	18.3505
	0.00811	7.206	-0.01107	7.206	-0.01403	7.206		0.00504	13.1546	-0.00324	13.1546	-0.00145	13.1546		0.00628	12.8706	-0.0055	12.8706	-0.00472	12.8706		0.00503	17.2313	-6.57e-05	17.2313	0.0049	17.2313			0.00684	16.5488	-0.00777	16.5488	-0.00859	16.5488		0.00498	15.9108	-0.00216	15.9108	0.000659	15.9108		0.00472	18.4591	-0.000597	18.4591	0.00353	18.4591
	0.00811	7.18053	-0.01109	7.18053	-0.01407	7.18053		0.00504	13.1338	-0.00328	13.1338	-0.00151	13.1338		0.0063	12.7902	-0.00556	12.7902	-0.00481	12.7902		0.00505	17.2463	-6.69e-05	17.2463	0.00492	17.2463			0.00684	16.5646	-0.00779	16.5646	-0.00862	16.5646		0.005	15.9468	-0.00217	15.9468	0.00066	15.9468		0.00473	18.4538	-0.000609	18.4538	0.00351	18.4538
	0.00814	7.22788	-0.01113	7.22788	-0.01412	7.22788		0.00506	13.1431	-0.0033	13.1431	-0.00154	13.1431		0.00632	12.7977	-0.00558	12.7977	-0.00485	12.7977		0.00505	17.2825	-6.99e-05	17.2825	0.00491	17.2825			0.00686	16.5935	-0.00781	16.5935	-0.00864	16.5935		0.005	15.9902	-0.00217	15.9902	0.00066	15.9902		0.00474	18.4761	-0.000622	18.4761	0.0035	18.4761
	0.00816	7.19314	-0.01116	7.19314	-0.01416	7.19314		0.00507	13.1817	-0.00333	13.1817	-0.00158	13.1817		0.00632	12.7472	-0.00564	12.7472	-0.00496	12.7472		0.00505	17.3155	-7.17e-05	17.3155	0.00491	17.3155			0.00687	16.6113	-0.00783	16.6113	-0.00867	16.6113		0.00502	16.0464	-0.00218	16.0464	0.000662	16.0464		0.00475	18.5381	-0.000633	18.5381	0.00348	18.5381
	0.00816	7.27579	-0.01119	7.27579	-0.01422	7.27579		0.00507	13.1139	-0.00335	13.1139	-0.00163	13.1139		0.00632	12.6846	-0.00567	12.6846	-0.00501	12.6846		0.00506	17.3274	-7.53e-05	17.3274	0.00491	17.3274			0.00691	16.6671	-0.00785	16.6671	-0.00868	16.6671		0.00502	16.0777	-0.00218	16.0777	0.000662	16.0777		0.00475	18.5426	-0.000643	18.5426	0.00346	18.5426
	0.00819	7.21447	-0.01121	7.21447	-0.01423	7.21447		0.00509	13.1766	-0.00338	13.1766	-0.00167	13.1766		0.00635	12.6733	-0.00572	12.6733	-0.00509	12.6733		0.00507	17.3045	-7.83e-05	17.3045	0.00491	17.3045			0.00691	16.6938	-0.00787	16.6938	-0.00871	16.6938		0.00504	16.1695	-0.00219	16.1695	0.000663	16.1695		0.00476	18.6073	-0.000655	18.6073	0.00345	18.6073
	0.00819	7.2352	-0.01124	7.2352	-0.01429	7.2352		0.0051	13.1714	-0.0034	13.1714	-0.00171	13.1714		0.00635	12.6372	-0.00575	12.6372	-0.00515	12.6372		0.00507	17.3261	-8.19e-05	17.3261	0.00491	17.3261			0.00691	16.6584	-0.00789	16.6584	-0.00874	16.6584		0.00504	16.1703	-0.0022	16.1703	0.000644	16.1703		0.00477	18.6372	-0.000664	18.6372	0.00344	18.6372
	0.00822	7.11882	-0.01127	7.11882	-0.01432	7.11882		0.0051	13.2232	-0.00342	13.2232	-0.00175	13.2232		0.00637	12.5656	-0.00581	12.5656	-0.00524	12.5656		0.00508	17.3638	-0.000105	17.3638	0.00487	17.3638			0.00691	16.6531	-0.0079	16.6531	-0.00876	16.6531		0.00505	16.2241	-0.0022	16.2241	0.000654	16.2241		0.00478	18.7005	-0.000675	18.7005	0.00343	18.7005
	0.00824	7.19696	-0.01131	7.19696	-0.01438	7.19696		0.00512	13.1907	-0.00345	13.1907	-0.00178	13.1907		0.00637	12.4871	-0.00583	12.4871	-0.0053	12.4871		0.00511	17.2939	-0.000155	17.2939	0.0048	17.2939			0.00694	16.6829	-0.00793	16.6829	-0.00878	16.6829		0.00506	16.2849	-0.00221	16.2849	0.000645	16.2849		0.00479	18.7275	-0.000683	18.7275	0.00342	18.7275
	0.00822	7.21929	-0.01134	7.21929	-0.01446	7.21929		0.00512	13.2017	-0.00346	13.2017	-0.00181	13.2017		0.00641	12.4443	-0.00586	12.4443	-0.00531	12.4443		0.00512	17.347	-0.000206	17.347	0.00471	17.347			0.00692	16.6684	-0.00794	16.6684	-0.00881	16.6684		0.00507	16.2889	-0.00221	16.2889	0.000655	16.2889		0.0048	18.7846	-0.000695	18.7846	0.00341	18.7846
	0.00826	7.22785	-0.01137	7.22785	-0.01448	7.22785		0.00514	13.1904	-0.00348	13.1904	-0.00183	13.1904		0.0064	12.3626	-0.00589	12.3626	-0.00538	12.3626		0.00513	17.3712	-0.000241	17.3712	0.00465	17.3712			0.00697	16.7124	-0.00797	16.7124	-0.00882	16.7124		0.00508	16.281	-0.00222	16.281	0.000646	16.281		0.00479	18.7664	-0.000703	18.7664	0.00338	18.7664
	0.0083	7.14234	-0.01139	7.14234	-0.01448	7.14234		0.00515	13.2055	-0.00351	13.2055	-0.00186	13.2055		0.00642	12.3221	-0.00594	12.3221	-0.00547	12.3221		0.00514	17.4077	-0.000275	17.4077	0.00459	17.4077			0.00699	16.7224	-0.00798	16.7224	-0.00884	16.7224		0.00509	16.32	-0.00222	16.32	0.000656	16.32		0.0048	18.8482	-0.000718	18.8482	0.00336	18.8482
	0.0083	7.17436	-0.01142	7.17436	-0.01454	7.17436		0.00514	13.1507	-0.00353	13.1507	-0.00192	13.1507		0.00645	12.3019	-0.00597	12.3019	-0.00549	12.3019		0.00514	17.4064	-0.000307	17.4064	0.00453	17.4064			0.00698	16.7256	-0.008	16.7256	-0.00887	16.7256		0.00511	16.3881	-0.00223	16.3881	0.000657	16.3881		0.00482	18.8595	-0.000733	18.8595	0.00335	18.8595
	0.00832	7.20109	-0.01144	7.20109	-0.01456	7.20109		0.00516	13.2104	-0.00355	13.2104	-0.00194	13.2104		0.00645	12.2328	-0.00603	12.2328	-0.00561	12.2328		0.00515	17.4316	-0.000337	17.4316	0.00448	17.4316			0.00702	16.7397	-0.00802	16.7397	-0.00889	16.7397		0.00511	16.4381	-0.00223	16.4381	0.000657	16.4381		0.00482	18.9015	-0.00073	18.9015	0.00336	18.9015
	0.00832	7.16191	-0.01147	7.16191	-0.01462	7.16191		0.00519	13.2049	-0.00357	13.2049	-0.00195	13.2049		0.00646	12.2354	-0.00606	12.2354	-0.00565	12.2354		0.00516	17.4497	-0.000371	17.4497	0.00442	17.4497			0.00703	16.7898	-0.00804	16.7898	-0.00891	16.7898		0.00512	16.5018	-0.00224	16.5018	0.000648	16.5018		0.00484	18.9266	-0.000738	18.9266	0.00336	18.9266
	0.00835	7.21493	-0.01149	7.21493	-0.01463	7.21493		0.00519	13.2371	-0.00359	13.2371	-0.00199	13.2371		0.00647	12.1584	-0.00608	12.1584	-0.0057	12.1584		0.00518	17.4572	-0.000404	17.4572	0.00437	17.4572			0.00701	16.7902	-0.00806	16.7902	-0.00894	16.7902		0.00511	16.5055	-0.00225	16.5055	0.000619	16.5055		0.00486	18.9573	-0.000748	18.9573	0.00336	18.9573
	0.00835	7.15625	-0.01151	7.15625	-0.01467	7.15625		0.0052	13.3041	-0.00362	13.3041	-0.00203	13.3041		0.00647	12.0899	-0.00617	12.0899	-0.00586	12.0899		0.00519	17.4752	-0.000438	17.4752	0.00431	17.4752			0.00705	16.8037	-0.00808	16.8037	-0.00895	16.8037		0.00514	16.5284	-0.00225	16.5284	0.000649	16.5284		0.00486	18.9982	-0.000759	18.9982	0.00334	18.9982
	0.00837	7.19613	-0.01153	7.19613	-0.01469	7.19613		0.0052	13.2317	-0.00363	13.2317	-0.00207	13.2317		0.00648	12.0357	-0.00619	12.0357	-0.00591	12.0357		0.00519	17.4913	-0.000473	17.4913	0.00424	17.4913			0.00703	16.8595	-0.0081	16.8595	-0.00899	16.8595		0.00515	16.5559	-0.00225	16.5559	0.000641	16.5559		0.00486	19.0228	-0.000777	19.0228	0.00331	19.0228
	0.00838	7.20197	-0.01155	7.20197	-0.01472	7.20197		0.00522	13.2561	-0.00366	13.2561	-0.0021	13.2561		0.00651	12.0128	-0.00622	12.0128	-0.00593	12.0128		0.0052	17.5065	-0.00051	17.5065	0.00418	17.5065			0.00708	16.8994	-0.00811	16.8994	-0.009	16.8994		0.00515	16.5888	-0.00225	16.5888	0.000641	16.5888		0.00488	19.0618	-0.000785	19.0618	0.00331	19.0618
	0.0084	7.20091	-0.01157	7.20091	-0.01474	7.20091		0.00522	13.2709	-0.00368	13.2709	-0.00214	13.2709		0.00652	11.9664	-0.00628	11.9664	-0.00604	11.9664		0.00522	17.53	-0.000551	17.53	0.00412	17.53			0.00708	16.8705	-0.00813	16.8705	-0.00902	16.8705		0.00517	16.6435	-0.00226	16.6435	0.000642	16.6435		0.0049	19.062	-0.0008	19.062	0.0033	19.062
	0.00843	7.25202	-0.01159	7.25202	-0.01475	7.25202		0.00523	13.3066	-0.0037	13.3066	-0.00218	13.3066		0.00655	11.897	-0.00631	11.897	-0.00606	11.897		0.00522	17.5337	-0.000592	17.5337	0.00404	17.5337			0.00708	16.9054	-0.00815	16.9054	-0.00905	16.9054		0.00519	16.6812	-0.00227	16.6812	0.000643	16.6812		0.0049	19.1271	-0.000808	19.1271	0.00328	19.1271
	0.00843	7.23647	-0.01162	7.23647	-0.01481	7.23647		0.00524	13.225	-0.00372	13.225	-0.00221	13.225		0.00653	11.8949	-0.00639	11.8949	-0.00625	11.8949		0.00522	17.6091	-0.000633	17.6091	0.00395	17.6091			0.00709	16.9281	-0.00817	16.9281	-0.00907	16.9281		0.0052	16.7041	-0.00227	16.7041	0.000653	16.7041		0.0049	19.1524	-0.000815	19.1524	0.00327	19.1524
	0.00846	7.27125	-0.01164	7.27125	-0.01482	7.27125		0.00525	13.3767	-0.00375	13.3767	-0.00225	13.3767		0.00656	11.848	-0.00642	11.848	-0.00627	11.848		0.00524	17.5667	-0.00067	17.5667	0.0039	17.5667			0.00714	16.9788	-0.00818	16.9788	-0.00907	16.9788		0.0052	16.7475	-0.00228	16.7475	0.000634	16.7475		0.00492	19.1716	-0.000823	19.1716	0.00327	19.1716
	0.00846	7.23547	-0.01166	7.23547	-0.01486	7.23547		0.00527	13.3858	-0.00377	13.3858	-0.00226	13.3858		0.00658	11.7981	-0.00647	11.7981	-0.00636	11.7981		0.00524	17.5602	-0.000706	17.5602	0.00383	17.5602			0.00712	16.9819	-0.0082	16.9819	-0.00911	16.9819		0.0052	16.7369	-0.00229	16.7369	0.000615	16.7369		0.00493	19.2131	-0.000831	19.2131	0.00327	19.2131
	0.0085	7.28517	-0.01169	7.28517	-0.01488	7.28517		0.00527	13.3227	-0.00379	13.3227	-0.00231	13.3227		0.00658	11.7538	-0.00653	11.7538	-0.00648	11.7538		0.00526	17.6042	-0.000738	17.6042	0.00378	17.6042			0.00713	17.0292	-0.00821	17.0292	-0.00912	17.0292		0.00521	16.7765	-0.00229	16.7765	0.000625	16.7765		0.00494	19.2607	-0.000846	19.2607	0.00325	19.2607
	0.0085	7.22529	-0.01172	7.22529	-0.01494	7.22529		0.00529	13.3365	-0.00381	13.3365	-0.00233	13.3365		0.00658	11.7178	-0.00656	11.7178	-0.00653	11.7178		0.00526	17.6308	-0.000769	17.6308	0.00372	17.6308			0.00719	16.9727	-0.00822	16.9727	-0.00912	16.9727		0.00522	16.8111	-0.0023	16.8111	0.000616	16.8111		0.00495	19.2781	-0.000862	19.2781	0.00323	19.2781
	0.0085	7.29085	-0.01174	7.29085	-0.01498	7.29085		0.00529	13.3025	-0.00383	13.3025	-0.00236	13.3025		0.00661	11.6688	-0.00658	11.6688	-0.00656	11.6688		0.00527	17.6004	-0.000811	17.6004	0.00365	17.6004			0.00716	17.0428	-0.00824	17.0428	-0.00915	17.0428		0.00523	16.8225	-0.0023	16.8225	0.000626	16.8225		0.00494	19.3264	-0.000869	19.3264	0.0032	19.3264
	0.00853	7.23011	-0.01177	7.23011	-0.01501	7.23011		0.00531	13.2479	-0.00385	13.2479	-0.00238	13.2479		0.00661	11.6672	-0.00664	11.6672	-0.00667	11.6672		0.00529	17.6446	-0.000843	17.6446	0.0036	17.6446			0.00716	17.1085	-0.00825	17.1085	-0.00916	17.1085		0.00525	16.8496	-0.00231	16.8496	0.000627	16.8496		0.00497	19.3583	-0.000885	19.3583	0.0032	19.3583
	0.00851	7.29423	-0.01179	7.29423	-0.01507	7.29423		0.00531	13.2981	-0.00387	13.2981	-0.00242	13.2981		0.00661	11.6215	-0.00669	11.6215	-0.00678	11.6215		0.00529	17.6241	-0.00088	17.6241	0.00353	17.6241			0.0072	17.1049	-0.00826	17.1049	-0.00917	17.1049		0.00525	16.8806	-0.00232	16.8806	0.000608	16.8806		0.00496	19.4078	-0.0009	19.4078	0.00316	19.4078
	0.00854	7.23264	-0.01182	7.23264	-0.0151	7.23264		0.00531	13.3609	-0.00388	13.3609	-0.00246	13.3609		0.00663	11.6119	-0.00672	11.6119	-0.00681	11.6119		0.0053	17.6545	-0.000915	17.6545	0.00347	17.6545			0.00721	17.1248	-0.00828	17.1248	-0.00918	17.1248		0.00526	16.9315	-0.00232	16.9315	0.000618	16.9315		0.00497	19.4448	-0.000908	19.4448	0.00315	19.4448
	0.00856	7.30815	-0.01185	7.30815	-0.01514	7.30815		0.00533	13.3596	-0.0039	13.3596	-0.00248	13.3596		0.00666	11.5683	-0.00675	11.5683	-0.00684	11.5683		0.00532	17.6507	-0.00094	17.6507	0.00344	17.6507			0.0072	17.1692	-0.00829	17.1692	-0.00921	17.1692		0.00528	16.9174	-0.00233	16.9174	0.00062	16.9174		0.00498	19.502	-0.000915	19.502	0.00315	19.502
	0.00861	7.27543	-0.01187	7.27543	-0.01513	7.27543		0.00532	13.3379	-0.00391	13.3379	-0.00251	13.3379		0.00667	11.5049	-0.00681	11.5049	-0.00694	11.5049		0.00532	17.6538	-0.000974	17.6538	0.00337	17.6538			0.00724	17.167	-0.0083	17.167	-0.00921	17.167		0.00529	16.9442	-0.00233	16.9442	0.00063	16.9442		0.00501	19.4864	-0.000923	19.4864	0.00316	19.4864
	0.00859	7.23319	-0.01189	7.23319	-0.01519	7.23319		0.00534	13.3668	-0.00393	13.3668	-0.00253	13.3668		0.00669	11.4914	-0.00686	11.4914	-0.00703	11.4914		0.00532	17.7292	-0.001	17.7292	0.00332	17.7292			0.00723	17.1725	-0.00831	17.1725	-0.00922	17.1725		0.00529	16.951	-0.00234	16.951	0.000611	16.951		0.005	19.5158	-0.000938	19.5158	0.00312	19.5158
	0.00862	7.23191	-0.01192	7.23191	-0.01522	7.23191		0.00535	13.3714	-0.00395	13.3714	-0.00256	13.3714		0.00669	11.4998	-0.00689	11.4998	-0.00709	11.4998		0.00534	17.7487	-0.00103	17.7487	0.00329	17.7487			0.00728	17.1975	-0.00833	17.1975	-0.00922	17.1975		0.0053	16.9971	-0.00235	16.9971	0.000602	16.9971		0.005	19.5622	-0.000946	19.5622	0.00311	19.5622
	0.00866	7.28915	-0.01194	7.28915	-0.01522	7.28915		0.00538	13.4073	-0.00397	13.4073	-0.00257	13.4073		0.00671	11.5038	-0.00692	11.5038	-0.00712	11.5038		0.00535	17.7392	-0.00106	17.7392	0.00323	17.7392			0.00727	17.2351	-0.00833	17.2351	-0.00924	17.2351		0.0053	17.0424	-0.00235	17.0424	0.000602	17.0424		0.00501	19.5958	-0.000962	19.5958	0.00309	19.5958
	0.00866	7.30899	-0.01197	7.30899	-0.01528	7.30899		0.00537	13.3811	-0.00399	13.3811	-0.00261	13.3811		0.00672	11.4844	-0.00697	11.4844	-0.00722	11.4844		0.00536	17.768	-0.00109	17.768	0.00319	17.768			0.0073	17.2294	-0.00835	17.2294	-0.00925	17.2294		0.00533	17.104	-0.00236	17.104	0.000613	17.104		0.00503	19.6424	-0.000977	19.6424	0.00308	19.6424
	0.00866	7.19998	-0.01199	7.19998	-0.01532	7.19998		0.00539	13.3575	-0.00401	13.3575	-0.00263	13.3575		0.00672	11.4735	-0.007	11.4735	-0.00728	11.4735		0.00539	17.7781	-0.00112	17.7781	0.00315	17.7781			0.00731	17.287	-0.00836	17.287	-0.00926	17.287		0.00533	17.1097	-0.00237	17.1097	0.000594	17.1097		0.00504	19.6854	-0.000985	19.6854	0.00307	19.6854
	0.00869	7.25397	-0.01202	7.25397	-0.01535	7.25397		0.00541	13.3219	-0.00403	13.3219	-0.00265	13.3219		0.00673	11.4594	-0.00703	11.4594	-0.00733	11.4594		0.00538	17.7726	-0.00115	17.7726	0.00309	17.7726			0.00731	17.3112	-0.00837	17.3112	-0.00928	17.3112		0.00534	17.1801	-0.00238	17.1801	0.000585	17.1801		0.00505	19.7358	-0.001	19.7358	0.00305	19.7358
	0.00872	7.32005	-0.01205	7.32005	-0.01538	7.32005		0.00541	13.326	-0.00405	13.326	-0.00269	13.326		0.00674	11.4644	-0.00708	11.4644	-0.00743	11.4644		0.00539	17.7919	-0.00118	17.7919	0.00303	17.7919			0.00732	17.2965	-0.00837	17.2965	-0.00928	17.2965		0.00534	17.1961	-0.00239	17.1961	0.000566	17.1961		0.00506	19.7416	-0.00101	19.7416	0.00304	19.7416
	0.0087	7.25243	-0.01208	7.25243	-0.01546	7.25243		0.00541	13.4209	-0.00408	13.4209	-0.00274	13.4209		0.00674	11.3918	-0.00714	11.3918	-0.00754	11.3918		0.00541	17.8268	-0.00121	17.8268	0.003	17.8268			0.00735	17.3406	-0.00839	17.3406	-0.00929	17.3406		0.00537	17.2403	-0.0024	17.2403	0.000578	17.2403		0.00506	19.8007	-0.00102	19.8007	0.00301	19.8007
	0.00872	7.2613	-0.0121	7.2613	-0.01548	7.2613		0.00543	13.3446	-0.00409	13.3446	-0.00275	13.3446		0.00677	11.4099	-0.00717	11.4099	-0.00756	11.4099		0.00541	17.8578	-0.00124	17.8578	0.00293	17.8578			0.00735	17.3741	-0.0084	17.3741	-0.0093	17.3741		0.00537	17.285	-0.00241	17.285	0.000559	17.285		0.00508	19.833	-0.00103	19.833	0.00302	19.833
	0.00875	7.18017	-0.01213	7.18017	-0.01551	7.18017		0.00545	13.3571	-0.00411	13.3571	-0.00277	13.3571		0.00677	11.4445	-0.00722	11.4445	-0.00767	11.4445		0.00542	17.8606	-0.00127	17.8606	0.00287	17.8606			0.00738	17.4111	-0.0084	17.4111	-0.0093	17.4111		0.00537	17.3069	-0.00241	17.3069	0.000559	17.3069		0.00509	19.8783	-0.00104	19.8783	0.00301	19.8783
	0.00874	7.2657	-0.01216	7.2657	-0.01558	7.2657		0.00544	13.3635	-0.00413	13.3635	-0.00282	13.3635		0.00679	11.4137	-0.00725	11.4137	-0.00771	11.4137		0.00543	17.8105	-0.0013	17.8105	0.00283	17.8105			0.00738	17.3605	-0.00841	17.3605	-0.00932	17.3605		0.00538	17.3474	-0.00242	17.3474	0.00055	17.3474		0.0051	19.8988	-0.00105	19.8988	0.00299	19.8988
	0.00877	7.28369	-0.01218	7.28369	-0.01559	7.28369		0.00545	13.3742	-0.00414	13.3742	-0.00284	13.3742		0.00682	11.3886	-0.00728	11.3886	-0.00774	11.3886		0.00545	17.868	-0.00132	17.868	0.0028	17.868			0.00738	17.4561	-0.00842	17.4561	-0.00932	17.4561		0.00539	17.3671	-0.00242	17.3671	0.000541	17.3671		0.00511	19.9412	-0.00107	19.9412	0.00297	19.9412
	0.0088	7.21242	-0.01221	7.21242	-0.01562	7.21242		0.00547	13.3588	-0.00417	13.3588	-0.00288	13.3588		0.00682	11.3824	-0.00731	11.3824	-0.00779	11.3824		0.00545	17.9098	-0.00136	17.9098	0.00273	17.9098			0.00742	17.4451	-0.00843	17.4451	-0.00932	17.4451		0.0054	17.3981	-0.00243	17.3981	0.000532	17.3981		0.00511	19.9849	-0.00108	19.9849	0.00294	19.9849
	0.0088	7.21227	-0.01223	7.21227	-0.01566	7.21227		0.00546	13.3498	-0.00419	13.3498	-0.00292	13.3498		0.00683	11.4064	-0.00736	11.4064	-0.00789	11.4064		0.00545	17.9444	-0.00138	17.9444	0.00268	17.9444			0.00742	17.4518	-0.00844	17.4518	-0.00934	17.4518		0.00541	17.4111	-0.00244	17.4111	0.000523	17.4111		0.00512	19.9892	-0.00109	19.9892	0.00294	19.9892
	0.00883	7.23246	-0.01226	7.23246	-0.01569	7.23246		0.00548	13.4326	-0.00421	13.4326	-0.00294	13.4326		0.00684	11.4076	-0.00739	11.4076	-0.00794	11.4076		0.00547	17.9449	-0.00142	17.9449	0.00263	17.9449			0.00743	17.5249	-0.00845	17.5249	-0.00934	17.5249		0.00543	17.4392	-0.00244	17.4392	0.000543	17.4392		0.00512	20.0183	-0.0011	20.0183	0.00292	20.0183
	0.00886	7.21712	-0.01229	7.21712	-0.01572	7.21712		0.0055	13.4123	-0.00423	13.4123	-0.00296	13.4123		0.00684	11.3654	-0.00742	11.3654	-0.00799	11.3654		0.00547	17.9444	-0.00145	17.9444	0.00256	17.9444			0.00745	17.5188	-0.00846	17.5188	-0.00935	17.5188		0.00544	17.4859	-0.00245	17.4859	0.000534	17.4859		0.00515	20.0289	-0.00111	20.0289	0.00293	20.0289
	0.00886	7.23623	-0.01232	7.23623	-0.01578	7.23623		0.0055	13.3914	-0.00425	13.3914	-0.003	13.3914		0.00688	11.3635	-0.00747	11.3635	-0.00806	11.3635		0.00549	18.013	-0.00148	18.013	0.00253	18.013			0.00745	17.5744	-0.00847	17.5744	-0.00936	17.5744		0.00545	17.5236	-0.00246	17.5236	0.000525	17.5236		0.00515	20.0705	-0.00113	20.0705	0.00289	20.0705
	0.00888	7.24967	-0.01235	7.24967	-0.01582	7.24967		0.00552	13.3751	-0.00427	13.3751	-0.00301	13.3751		0.00688	11.372	-0.0075	11.372	-0.00812	11.372		0.00549	18.0228	-0.00151	18.0228	0.00246	18.0228			0.00749	17.5789	-0.00848	17.5789	-0.00936	17.5789		0.00545	17.5468	-0.00247	17.5468	0.000507	17.5468		0.00516	20.1138	-0.00115	20.1138	0.00287	20.1138
	0.00888	7.25431	-0.01238	7.25431	-0.01588	7.25431		0.00554	13.4084	-0.00429	13.4084	-0.00303	13.4084		0.00689	11.3284	-0.00756	11.3284	-0.00822	11.3284		0.00549	18.0114	-0.00155	18.0114	0.0024	18.0114			0.00749	17.6257	-0.00848	17.6257	-0.00937	17.6257		0.00547	17.5784	-0.00248	17.5784	0.000508	17.5784		0.00515	20.196	-0.00115	20.196	0.00284	20.196
	0.00888	7.27344	-0.0124	7.27344	-0.01592	7.27344		0.00554	13.3649	-0.00431	13.3649	-0.00307	13.3649		0.00691	11.3181	-0.00761	11.3181	-0.00831	11.3181		0.00551	17.9783	-0.00158	17.9783	0.00235	17.9783			0.00749	17.6335	-0.00849	17.6335	-0.00938	17.6335		0.00547	17.604	-0.00248	17.604	0.000508	17.604		0.00518	20.2051	-0.00116	20.2051	0.00286	20.2051
	0.00891	7.24939	-0.01243	7.24939	-0.01595	7.24939		0.00555	13.3834	-0.00433	13.3834	-0.0031	13.3834		0.00692	11.2955	-0.00764	11.2955	-0.00836	11.2955		0.00553	17.9911	-0.00162	17.9911	0.0023	17.9911			0.00752	17.6718	-0.0085	17.6718	-0.00939	17.6718		0.00548	17.67	-0.00249	17.67	0.000499	17.67		0.00518	20.2711	-0.00118	20.2711	0.00283	20.2711
	0.00894	7.23291	-0.01246	7.23291	-0.01598	7.23291		0.00555	13.4375	-0.00435	13.4375	-0.00314	13.4375		0.00693	11.2716	-0.00769	11.2716	-0.00846	11.2716		0.00553	18.0122	-0.00164	18.0122	0.00225	18.0122			0.00756	17.6831	-0.00851	17.6831	-0.00938	17.6831		0.0055	17.6461	-0.0025	17.6461	0.0005	17.6461		0.0052	20.2907	-0.00118	20.2907	0.00283	20.2907
	0.00896	7.15789	-0.01249	7.15789	-0.01602	7.15789		0.00555	13.4112	-0.00437	13.4112	-0.00318	13.4112		0.00693	11.2576	-0.00772	11.2576	-0.00851	11.2576		0.00554	18.0611	-0.00168	18.0611	0.00219	18.0611			0.00756	17.6765	-0.00852	17.6765	-0.00939	17.6765		0.00551	17.7119	-0.00251	17.7119	0.000491	17.7119		0.0052	20.2886	-0.00121	20.2886	0.00278	20.2886
	0.00896	7.22795	-0.01252	7.22795	-0.01608	7.22795		0.00557	13.4025	-0.00439	13.4025	-0.00321	13.4025		0.00693	11.2599	-0.00775	11.2599	-0.00857	11.2599		0.00555	18.0459	-0.00171	18.0459	0.00213	18.0459			0.00754	17.6994	-0.00852	17.6994	-0.0094	17.6994		0.00551	17.715	-0.00252	17.715	0.000472	17.715		0.00521	20.3669	-0.00122	20.3669	0.00278	20.3669
	0.00896	7.1921	-0.01255	7.1921	-0.01614	7.1921		0.00559	13.3924	-0.00441	13.3924	-0.00323	13.3924		0.00698	11.2018	-0.00781	11.2018	-0.00863	11.2018		0.00556	18.065	-0.00174	18.065	0.00209	18.065			0.00757	17.7751	-0.00853	17.7751	-0.00941	17.7751		0.00554	17.7533	-0.00253	17.7533	0.000483	17.7533		0.00522	20.3453	-0.00123	20.3453	0.00276	20.3453
	0.00902	7.13338	-0.01258	7.13338	-0.01614	7.13338		0.0056	13.3685	-0.00443	13.3685	-0.00326	13.3685		0.00698	11.172	-0.00783	11.172	-0.00869	11.172		0.00557	18.1027	-0.00176	18.1027	0.00205	18.1027			0.00758	17.8123	-0.00854	17.8123	-0.00941	17.8123		0.00553	17.77	-0.00254	17.77	0.000455	17.77		0.00522	20.4552	-0.00124	20.4552	0.00274	20.4552
	0.00902	7.17737	-0.0126	7.17737	-0.01618	7.17737		0.0056	13.3258	-0.00445	13.3258	-0.0033	13.3258		0.00698	11.1909	-0.00789	11.1909	-0.0088	11.1909		0.00559	18.0891	-0.00179	18.0891	0.002	18.0891			0.00761	17.8316	-0.00855	17.8316	-0.00941	17.8316		0.00556	17.8314	-0.00255	17.8314	0.000466	17.8314		0.00524	20.4804	-0.00125	20.4804	0.00275	20.4804
	0.00901	7.18614	-0.01263	7.18614	-0.01625	7.18614		0.0056	13.2734	-0.00447	13.2734	-0.00334	13.2734		0.00699	11.1649	-0.00792	11.1649	-0.00884	11.1649		0.0056	18.1303	-0.00182	18.1303	0.00196	18.1303			0.00757	17.7868	-0.00856	17.7868	-0.00944	17.7868		0.00555	17.8209	-0.00255	17.8209	0.000456	17.8209		0.00525	20.4873	-0.00126	20.4873	0.00273	20.4873
	0.00904	7.2433	-0.01265	7.2433	-0.01626	7.2433		0.00564	13.2796	-0.00449	13.2796	-0.00335	13.2796		0.00703	11.1419	-0.00794	11.1419	-0.00886	11.1419		0.0056	18.1124	-0.00185	18.1124	0.00191	18.1124			0.00761	17.8314	-0.00856	17.8314	-0.00943	17.8314		0.00556	17.9099	-0.00256	17.9099	0.000447	17.9099		0.00525	20.5753	-0.00128	20.5753	0.0027	20.5753
	0.00906	7.1733	-0.01268	7.1733	-0.0163	7.1733		0.00564	13.3044	-0.00452	13.3044	-0.0034	13.3044		0.00703	11.1219	-0.008	11.1219	-0.00897	11.1219		0.00562	18.1427	-0.00188	18.1427	0.00186	18.1427			0.00764	17.8246	-0.00856	17.8246	-0.00942	17.8246		0.00556	17.9044	-0.00257	17.9044	0.000428	17.9044		0.00527	20.6085	-0.00128	20.6085	0.0027	20.6085
	0.00906	7.1797	-0.0127	7.1797	-0.01634	7.1797		0.00563	13.1878	-0.00454	13.1878	-0.00345	13.1878		0.00703	11.1271	-0.00803	11.1271	-0.00903	11.1271		0.00562	18.0861	-0.0019	18.0861	0.00183	18.0861			0.00767	17.8599	-0.00857	17.8599	-0.00943	17.8599		0.00557	17.9105	-0.00258	17.9105	0.000419	17.9105		0.00527	20.568	-0.00129	20.568	0.00269	20.568
	0.00909	7.16664	-0.01273	7.16664	-0.01637	7.16664		0.00565	13.2208	-0.00456	13.2208	-0.00347	13.2208		0.00705	11.0928	-0.00806	11.0928	-0.00906	11.0928		0.00564	18.1023	-0.00193	18.1023	0.00178	18.1023			0.00764	17.9379	-0.00858	17.9379	-0.00945	17.9379		0.00558	18.0011	-0.00258	18.0011	0.00041	18.0011		0.0053	20.6383	-0.00131	20.6383	0.00268	20.6383
	0.00912	7.10557	-0.01277	7.10557	-0.01642	7.10557		0.00566	13.2063	-0.00458	13.2063	-0.0035	13.2063		0.00705	11.0599	-0.00811	11.0599	-0.00917	11.0599		0.00566	18.148	-0.00195	18.148	0.00176	18.148			0.00767	17.9615	-0.00859	17.9615	-0.00945	17.9615		0.00561	17.9985	-0.00259	17.9985	0.000421	17.9985		0.00529	20.6569	-0.00132	20.6569	0.00266	20.6569
	0.00914	7.13323	-0.01279	7.13323	-0.01644	7.13323		0.00566	13.209	-0.00461	13.209	-0.00355	13.209		0.00707	11.0476	-0.00814	11.0476	-0.00921	11.0476		0.00565	18.129	-0.00197	18.129	0.0017	18.129			0.00768	18.0011	-0.0086	18.0011	-0.00946	18.0011		0.00561	18.0437	-0.0026	18.0437	0.000402	18.0437		0.0053	20.6761	-0.00132	20.6761	0.00265	20.6761
	0.00912	7.08709	-0.01282	7.08709	-0.01652	7.08709		0.00568	13.1846	-0.00463	13.1846	-0.00359	13.1846		0.00709	11.0604	-0.00819	11.0604	-0.0093	11.0604		0.00566	18.1712	-0.00201	18.1712	0.00164	18.1712			0.00771	18.0012	-0.00861	18.0012	-0.00946	18.0012		0.00562	18.1062	-0.00261	18.1062	0.000394	18.1062		0.00532	20.7427	-0.00133	20.7427	0.00266	20.7427
	0.00915	7.11486	-0.01284	7.11486	-0.01653	7.11486		0.0057	13.1667	-0.00465	13.1667	-0.0036	13.1667		0.00709	11.0522	-0.00822	11.0522	-0.00935	11.0522		0.00567	18.1895	-0.00203	18.1895	0.0016	18.1895			0.00771	17.9851	-0.00861	17.9851	-0.00946	17.9851		0.00562	18.0937	-0.00261	18.0937	0.000394	18.0937		0.00532	20.7475	-0.00134	20.7475	0.00264	20.7475
	0.00918	7.13224	-0.01287	7.13224	-0.01656	7.13224		0.00571	13.1794	-0.00467	13.1794	-0.00364	13.1794		0.00712	11.0601	-0.00825	11.0601	-0.00938	11.0601		0.00568	18.1445	-0.00206	18.1445	0.00156	18.1445			0.00773	18.0568	-0.00862	18.0568	-0.00946	18.0568		0.00564	18.1264	-0.00262	18.1264	0.000395	18.1264		0.00532	20.7747	-0.00135	20.7747	0.00263	20.7747
	0.00917	7.18436	-0.0129	7.18436	-0.01663	7.18436		0.0057	13.1657	-0.0047	13.1657	-0.0037	13.1657		0.00712	11.0511	-0.00831	11.0511	-0.00949	11.0511		0.0057	18.1864	-0.00209	18.1864	0.00153	18.1864			0.00773	18.0765	-0.00863	18.0765	-0.00947	18.0765		0.00565	18.1876	-0.00263	18.1876	0.000386	18.1876		0.00536	20.8315	-0.00135	20.8315	0.00265	20.8315
	0.0092	7.01994	-0.01293	7.01994	-0.01666	7.01994		0.00572	13.1647	-0.00471	13.1647	-0.00371	13.1647		0.00712	11.0146	-0.00833	11.0146	-0.00955	11.0146		0.0057	18.1799	-0.00212	18.1799	0.00146	18.1799			0.00775	18.0456	-0.00863	18.0456	-0.00948	18.0456		0.00566	18.177	-0.00264	18.177	0.000377	18.177		0.00535	20.8713	-0.00136	20.8713	0.00263	20.8713
	0.00922	7.09038	-0.01295	7.09038	-0.01668	7.09038		0.00574	13.1086	-0.00474	13.1086	-0.00374	13.1086		0.00714	11.0139	-0.00836	11.0139	-0.00958	11.0139		0.00571	18.2078	-0.00215	18.2078	0.00142	18.2078			0.00775	18.0252	-0.00863	18.0252	-0.00948	18.0252		0.00566	18.2021	-0.00265	18.2021	0.000358	18.2021		0.00536	20.8787	-0.00137	20.8787	0.00262	20.8787
	0.00923	7.1272	-0.01299	7.1272	-0.01675	7.1272		0.00573	13.0728	-0.00476	13.0728	-0.00379	13.0728		0.00717	10.9864	-0.00842	10.9864	-0.00966	10.9864		0.00573	18.2364	-0.00217	18.2364	0.00139	18.2364			0.00776	18.058	-0.00864	18.058	-0.00948	18.058		0.00568	18.2323	-0.00266	18.2323	0.000359	18.2323		0.00536	20.8832	-0.00138	20.8832	0.00259	20.8832
	0.00926	7.04688	-0.01303	7.04688	-0.0168	7.04688		0.00575	13.014	-0.00479	13.014	-0.00382	13.014		0.00718	10.9475	-0.00847	10.9475	-0.00976	10.9475		0.00573	18.2343	-0.0022	18.2343	0.00134	18.2343			0.00778	18.0764	-0.00864	18.0764	-0.00948	18.0764		0.0057	18.2301	-0.00267	18.2301	0.00036	18.2301		0.00536	20.9306	-0.0014	20.9306	0.00256	20.9306
	0.00926	6.98717	-0.01306	6.98717	-0.01686	6.98717		0.00576	12.994	-0.00481	12.994	-0.00385	12.994		0.00719	10.9663	-0.0085	10.9663	-0.00981	10.9663		0.00573	18.2208	-0.00222	18.2208	0.00129	18.2208			0.00782	18.1069	-0.00865	18.1069	-0.00948	18.1069		0.00569	18.2947	-0.00268	18.2947	0.000332	18.2947		0.00538	20.9579	-0.00141	20.9579	0.00256	20.9579
	0.00928	7.04892	-0.01311	7.04892	-0.01694	7.04892		0.00577	12.9467	-0.00483	12.9467	-0.00388	12.9467		0.00719	10.9235	-0.00856	10.9235	-0.00992	10.9235		0.00575	18.2637	-0.00225	18.2637	0.00125	18.2637			0.0078	18.1286	-0.00865	18.1286	-0.00949	18.1286		0.00571	18.291	-0.00269	18.291	0.000333	18.291		0.00539	21.0009	-0.00142	21.0009	0.00254	21.0009
	0.0093	6.98332	-0.01315	6.98332	-0.017	6.98332		0.00579	12.904	-0.00485	12.904	-0.00391	12.904		0.0072	10.8862	-0.00858	10.8862	-0.00997	10.8862		0.00575	18.2546	-0.00227	18.2546	0.0012	18.2546			0.00783	18.1063	-0.00866	18.1063	-0.00948	18.1063		0.00572	18.3688	-0.0027	18.3688	0.000324	18.3688		0.0054	21.0296	-0.00144	21.0296	0.00252	21.0296
	0.00931	6.92229	-0.01318	6.92229	-0.01705	6.92229		0.00579	12.8842	-0.00488	12.8842	-0.00397	12.8842		0.00722	10.921	-0.00864	10.921	-0.01006	10.921		0.00577	18.2244	-0.0023	18.2244	0.00117	18.2244			0.00783	18.0459	-0.00866	18.0459	-0.00948	18.0459		0.00572	18.3581	-0.00271	18.3581	0.000305	18.3581		0.00542	21.092	-0.00145	21.092	0.00251	21.092
	0.00931	6.99271	-0.01321	6.99271	-0.01711	6.99271		0.0058	12.8676	-0.0049	12.8676	-0.00401	12.8676		0.00722	10.8927	-0.00869	10.8927	-0.01017	10.8927		0.00577	18.2315	-0.00232	18.2315	0.00113	18.2315			0.00783	18.0154	-0.00866	18.0154	-0.00948	18.0154		0.00573	18.3679	-0.00272	18.3679	0.000296	18.3679		0.00542	21.1232	-0.00146	21.1232	0.0025	21.1232
	0.00934	6.89991	-0.01325	6.89991	-0.01716	6.89991		0.00581	12.8648	-0.00493	12.8648	-0.00406	12.8648		0.00724	10.9013	-0.00872	10.9013	-0.0102	10.9013		0.0058	18.2845	-0.00235	18.2845	0.00111	18.2845			0.00786	18.0329	-0.00866	18.0329	-0.00948	18.0329		0.00574	18.4138	-0.00273	18.4138	0.000287	18.4138		0.00543	21.1695	-0.00148	21.1695	0.00248	21.1695
	0.00933	6.9458	-0.01328	6.9458	-0.01723	6.9458		0.00582	12.7623	-0.00496	12.7623	-0.0041	12.7623		0.00724	10.8629	-0.00875	10.8629	-0.01026	10.8629		0.00579	18.2836	-0.00237	18.2836	0.00104	18.2836			0.00789	18.0412	-0.00867	18.0412	-0.00946	18.0412		0.00575	18.4003	-0.00274	18.4003	0.000278	18.4003		0.00543	21.1787	-0.00149	21.1787	0.00245	21.1787
	0.00936	6.93437	-0.01331	6.93437	-0.01726	6.93437		0.00582	12.7569	-0.00498	12.7569	-0.00414	12.7569		0.00728	10.8984	-0.00878	10.8984	-0.01028	10.8984		0.00579	18.2517	-0.0024	18.2517	0.000989	18.2517			0.00789	18.1039	-0.00867	18.1039	-0.00947	18.1039		0.00576	18.4707	-0.00275	18.4707	0.000269	18.4707		0.00544	21.2091	-0.00151	21.2091	0.00242	21.2091
	0.00938	6.92311	-0.01335	6.92311	-0.01732	6.92311		0.00584	12.7548	-0.00501	12.7548	-0.00417	12.7548		0.00727	10.8551	-0.00883	10.8551	-0.0104	10.8551		0.00581	18.2729	-0.00243	18.2729	0.000956	18.2729			0.00791	18.0739	-0.00867	18.0739	-0.00946	18.0739		0.00577	18.5146	-0.00275	18.5146	0.000279	18.5146		0.00545	21.2183	-0.00152	21.2183	0.0024	21.2183
	0.00938	6.86525	-0.01338	6.86525	-0.01738	6.86525		0.00583	12.7015	-0.00504	12.7015	-0.00424	12.7015		0.00729	10.8448	-0.00886	10.8448	-0.01043	10.8448		0.00583	18.2904	-0.00244	18.2904	0.000942	18.2904			0.0079	18.1307	-0.00867	18.1307	-0.00948	18.1307		0.00578	18.5278	-0.00275	18.5278	0.000271	18.5278		0.00547	21.2555	-0.00153	21.2555	0.00241	21.2555
	0.00942	6.85095	-0.01341	6.85095	-0.0174	6.85095		0.00585	12.6878	-0.00506	12.6878	-0.00427	12.6878		0.00729	10.8224	-0.00892	10.8224	-0.01054	10.8224		0.00583	18.3328	-0.00247	18.3328	0.000888	18.3328			0.00793	18.0475	-0.00868	18.0475	-0.00947	18.0475		0.00579	18.5531	-0.00276	18.5531	0.000262	18.5531		0.00549	21.3412	-0.00154	21.3412	0.00241	21.3412
	0.00946	6.88662	-0.01344	6.88662	-0.01742	6.88662		0.00586	12.6179	-0.00508	12.6179	-0.0043	12.6179		0.0073	10.8361	-0.00897	10.8361	-0.01064	10.8361		0.00585	18.3509	-0.00248	18.3509	0.000894	18.3509			0.00797	18.1029	-0.00868	18.1029	-0.00946	18.1029		0.00579	18.5758	-0.00277	18.5758	0.000243	18.5758		0.00547	21.3258	-0.00155	21.3258	0.00236	21.3258
	0.00944	6.90826	-0.01347	6.90826	-0.0175	6.90826		0.00586	12.5893	-0.00511	12.5893	-0.00435	12.5893		0.00733	10.8016	-0.009	10.8016	-0.01067	10.8016		0.00586	18.3265	-0.00252	18.3265	0.00083	18.3265			0.00795	18.0909	-0.00869	18.0909	-0.00947	18.0909		0.00581	18.5808	-0.00277	18.5808	0.000263	18.5808		0.0055	21.3366	-0.00157	21.3366	0.00236	21.3366
	0.00949	6.89255	-0.0135	6.89255	-0.01751	6.89255		0.00589	12.6308	-0.00514	12.6308	-0.00439	12.6308		0.00733	10.7789	-0.00906	10.7789	-0.01078	10.7789		0.00587	18.3599	-0.00253	18.3599	0.000806	18.3599			0.00797	18.1107	-0.00869	18.1107	-0.00948	18.1107		0.00583	18.6525	-0.00278	18.6525	0.000264	18.6525		0.0055	21.3897	-0.00158	21.3897	0.00235	21.3897
	0.00946	6.79511	-0.01352	6.79511	-0.01758	6.79511		0.00591	12.5113	-0.00516	12.5113	-0.00442	12.5113		0.00735	10.7955	-0.00908	10.7955	-0.01082	10.7955		0.00587	18.3585	-0.00256	18.3585	0.000752	18.3585			0.00801	18.079	-0.00869	18.079	-0.00946	18.079		0.00583	18.6471	-0.00279	18.6471	0.000245	18.6471		0.00551	21.439	-0.0016	21.439	0.00231	21.439
	0.00946	6.85026	-0.01355	6.85026	-0.01764	6.85026		0.0059	12.5182	-0.00518	12.5182	-0.00447	12.5182		0.00735	10.7773	-0.00911	10.7773	-0.01087	10.7773		0.00588	18.4043	-0.00259	18.4043	0.000708	18.4043			0.00801	18.1028	-0.0087	18.1028	-0.00946	18.1028		0.00583	18.6346	-0.0028	18.6346	0.000226	18.6346		0.00553	21.4103	-0.00161	21.4103	0.00231	21.4103
	0.00952	6.88946	-0.01358	6.88946	-0.01764	6.88946		0.00593	12.475	-0.00521	12.475	-0.00449	12.475		0.00735	10.748	-0.00917	10.748	-0.01098	10.748		0.0059	18.3716	-0.0026	18.3716	0.000694	18.3716			0.00801	18.093	-0.0087	18.093	-0.00946	18.093		0.00584	18.713	-0.00281	18.713	0.000217	18.713		0.00552	21.4942	-0.00162	21.4942	0.00227	21.4942
	0.00954	6.87083	-0.0136	6.87083	-0.01766	6.87083		0.00591	12.4133	-0.00523	12.4133	-0.00456	12.4133		0.00739	10.7585	-0.00922	10.7585	-0.01105	10.7585		0.00591	18.4584	-0.00263	18.4584	0.00065	18.4584			0.00802	18.1261	-0.00871	18.1261	-0.00946	18.1261		0.00585	18.7242	-0.00281	18.7242	0.000227	18.7242		0.00555	21.5798	-0.00163	21.5798	0.00229	21.5798
	0.0095	6.88213	-0.01362	6.88213	-0.01774	6.88213		0.00591	12.4104	-0.00527	12.4104	-0.00463	12.4104		0.0074	10.7395	-0.00925	10.7395	-0.0111	10.7395		0.0059	18.4813	-0.00265	18.4813	0.000605	18.4813			0.00804	18.0844	-0.00871	18.0844	-0.00946	18.0844		0.00586	18.7415	-0.00282	18.7415	0.000218	18.7415		0.00554	21.6139	-0.00165	21.6139	0.00225	21.6139
	0.00955	6.95048	-0.01364	6.95048	-0.01773	6.95048		0.00595	12.4189	-0.00529	12.4189	-0.00463	12.4189		0.0074	10.7213	-0.00928	10.7213	-0.01116	10.7213		0.00592	18.4354	-0.00267	18.4354	0.000571	18.4354			0.00805	18.1325	-0.00871	18.1325	-0.00946	18.1325		0.00588	18.7935	-0.00283	18.7935	0.00022	18.7935		0.00555	21.6506	-0.00165	21.6506	0.00224	21.6506
	0.0096	6.88089	-0.01367	6.88089	-0.01774	6.88089		0.00596	12.402	-0.00532	12.402	-0.00467	12.402		0.00743	10.7042	-0.00933	10.7042	-0.01124	10.7042		0.00591	18.4461	-0.00269	18.4461	0.000528	18.4461			0.00806	18.1061	-0.00871	18.1061	-0.00946	18.1061		0.00588	18.84	-0.00284	18.84	0.000201	18.84		0.00557	21.6722	-0.00166	21.6722	0.00225	21.6722
	0.00958	6.86861	-0.01369	6.86861	-0.0178	6.86861		0.00594	12.3311	-0.00535	12.3311	-0.00475	12.3311		0.00743	10.7068	-0.00939	10.7068	-0.01135	10.7068		0.00594	18.4467	-0.00272	18.4467	0.000503	18.4467			0.00805	18.1214	-0.00871	18.1214	-0.00947	18.1214		0.0059	18.8625	-0.00284	18.8625	0.000221	18.8625		0.00557	21.6675	-0.00167	21.6675	0.00223	21.6675
	0.0096	6.77687	-0.01371	6.77687	-0.01782	6.77687		0.00597	12.4038	-0.00536	12.4038	-0.00475	12.4038		0.00745	10.6773	-0.00944	10.6773	-0.01144	10.6773		0.00594	18.4625	-0.00274	18.4625	0.000469	18.4625			0.00812	18.0768	-0.00872	18.0768	-0.00945	18.0768		0.0059	18.9221	-0.00285	18.9221	0.000202	18.9221		0.00559	21.7059	-0.00168	21.7059	0.00222	21.7059
	0.00962	6.85769	-0.01374	6.85769	-0.01786	6.85769		0.006	12.2933	-0.00539	12.2933	-0.00479	12.2933		0.00745	10.6446	-0.00947	10.6446	-0.01149	10.6446		0.00596	18.4344	-0.00276	18.4344	0.000435	18.4344			0.00811	18.1056	-0.00872	18.1056	-0.00946	18.1056		0.00592	18.9529	-0.00286	18.9529	0.000203	18.9529		0.0056	21.7142	-0.0017	21.7142	0.0022	21.7142
	0.00965	6.89446	-0.01376	6.89446	-0.01787	6.89446		0.00599	12.2338	-0.00542	12.2338	-0.00485	12.2338		0.00745	10.6288	-0.0095	10.6288	-0.01155	10.6288		0.00597	18.4125	-0.00279	18.4125	0.000391	18.4125			0.00811	18.1174	-0.00873	18.1174	-0.00946	18.1174		0.00593	18.9884	-0.00287	18.9884	0.000194	18.9884		0.00561	21.7912	-0.00171	21.7912	0.00219	21.7912
	0.00962	6.90246	-0.01377	6.90246	-0.01792	6.90246		0.006	12.2842	-0.00544	12.2842	-0.00489	12.2842		0.00748	10.6443	-0.00956	10.6443	-0.01163	10.6443		0.00598	18.4508	-0.00282	18.4508	0.000348	18.4508			0.00813	18.0555	-0.00873	18.0555	-0.00946	18.0555		0.00594	18.971	-0.00288	18.971	0.000185	18.971		0.00561	21.8053	-0.00172	21.8053	0.00218	21.8053
	0.00963	6.90982	-0.01379	6.90982	-0.01795	6.90982		0.00601	12.2518	-0.00546	12.2518	-0.00492	12.2518		0.00749	10.6134	-0.00961	10.6134	-0.01173	10.6134		0.00599	18.435	-0.00284	18.435	0.000304	18.435			0.00813	18.0099	-0.00873	18.0099	-0.00946	18.0099		0.00594	19.0164	-0.00289	19.0164	0.000166	19.0164		0.00562	21.8296	-0.00172	21.8296	0.00217	21.8296
	0.00966	6.90373	-0.01381	6.90373	-0.01796	6.90373		0.00603	12.1494	-0.00549	12.1494	-0.00496	12.1494		0.0075	10.5679	-0.00964	10.5679	-0.01178	10.5679		0.006	18.4349	-0.00286	18.4349	0.000279	18.4349			0.00815	18.0238	-0.00874	18.0238	-0.00946	18.0238		0.00596	19.0536	-0.00289	19.0536	0.000186	19.0536		0.00562	21.8648	-0.00174	21.8648	0.00214	21.8648
	0.0097	6.9013	-0.01383	6.9013	-0.01796	6.9013		0.00601	12.257	-0.00552	12.257	-0.00502	12.257		0.00751	10.5382	-0.00967	10.5382	-0.01182	10.5382		0.006	18.4379	-0.00289	18.4379	0.000226	18.4379			0.0082	18.1132	-0.00874	18.1132	-0.00945	18.1132		0.00596	19.1248	-0.0029	19.1248	0.000168	19.1248		0.00564	21.9091	-0.00175	21.9091	0.00215	21.9091
	0.00971	7.01632	-0.01385	7.01632	-0.01799	7.01632		0.00602	12.3042	-0.00554	12.3042	-0.00506	12.3042		0.00753	10.5183	-0.00969	10.5183	-0.01186	10.5183		0.00602	18.4385	-0.0029	18.4385	0.000212	18.4385			0.00819	18.0215	-0.00874	18.0215	-0.00945	18.0215		0.00598	19.176	-0.00291	19.176	0.000169	19.176		0.00565	21.9616	-0.00177	21.9616	0.00211	21.9616
	0.00974	6.89844	-0.01387	6.89844	-0.018	6.89844		0.00604	12.2358	-0.00556	12.2358	-0.00508	12.2358		0.00754	10.5162	-0.00975	10.5162	-0.01196	10.5162		0.00604	18.4632	-0.00293	18.4632	0.000177	18.4632			0.00817	18.0228	-0.00875	18.0228	-0.00946	18.0228		0.00599	19.1847	-0.00292	19.1847	0.000141	19.1847		0.00566	21.9969	-0.00178	21.9969	0.00211	21.9969
	0.00974	6.96729	-0.01389	6.96729	-0.01804	6.96729		0.00606	12.1982	-0.00559	12.1982	-0.00511	12.1982		0.00756	10.505	-0.00981	10.505	-0.01205	10.505		0.00604	18.4637	-0.00296	18.4637	0.000123	18.4637			0.00822	18.043	-0.00875	18.043	-0.00945	18.043		0.00599	19.1775	-0.00293	19.1775	0.000122	19.1775		0.00566	22.0199	-0.00179	22.0199	0.00208	22.0199
	0.00974	6.96042	-0.01391	6.96042	-0.01808	6.96042		0.00607	12.1528	-0.00561	12.1528	-0.00514	12.1528		0.00756	10.4747	-0.00983	10.4747	-0.01211	10.4747		0.00604	18.4631	-0.00299	18.4631	6.95e-05	18.4631			0.00822	18.0608	-0.00875	18.0608	-0.00945	18.0608		0.006	19.1985	-0.00294	19.1985	0.000113	19.1985		0.00567	22.0967	-0.0018	22.0967	0.00207	22.0967
	0.00976	7.01031	-0.01393	7.01031	-0.0181	7.01031		0.00609	12.1036	-0.00564	12.1036	-0.00519	12.1036		0.00759	10.4603	-0.00989	10.4603	-0.01219	10.4603		0.00605	18.4706	-0.00301	18.4706	2.55e-05	18.4706			0.00826	18.0614	-0.00875	18.0614	-0.00944	18.0614		0.00601	19.2294	-0.00295	19.2294	0.000104	19.2294		0.00568	22.1083	-0.00182	22.1083	0.00205	22.1083
	0.00979	6.96328	-0.01395	6.96328	-0.01811	6.96328		0.00609	12.1547	-0.00567	12.1547	-0.00525	12.1547		0.00758	10.4517	-0.00994	10.4517	-0.01231	10.4517		0.00607	18.468	-0.00304	18.468	-8.5e-06	18.468			0.00826	18.0651	-0.00876	18.0651	-0.00945	18.0651		0.00603	19.1925	-0.00296	19.1925	0.000105	19.1925		0.00568	22.1523	-0.00183	22.1523	0.00202	22.1523
	0.00979	6.96804	-0.01397	6.96804	-0.01815	6.96804		0.00609	12.1037	-0.00569	12.1037	-0.0053	12.1037		0.0076	10.4261	-0.00997	10.4261	-0.01234	10.4261		0.00607	18.4642	-0.00306	18.4642	-4.25e-05	18.4642			0.00827	18.0356	-0.00876	18.0356	-0.00945	18.0356		0.00603	19.2507	-0.00297	19.2507	8.66e-05	19.2507		0.0057	22.176	-0.00185	22.176	0.00201	22.176
	0.00981	6.99929	-0.01399	6.99929	-0.01817	6.99929		0.0061	11.9804	-0.00572	11.9804	-0.00534	11.9804		0.00761	10.4128	-0.01003	10.4128	-0.01245	10.4128		0.00609	18.466	-0.0031	18.466	-0.000117	18.466			0.00827	18.0614	-0.00877	18.0614	-0.00946	18.0614		0.00604	19.2418	-0.00298	19.2418	7.77e-05	19.2418		0.00571	22.1943	-0.00185	22.1943	0.00202	22.1943
	0.00982	7.01248	-0.01401	7.01248	-0.0182	7.01248		0.00612	12.0345	-0.00574	12.0345	-0.00537	12.0345		0.00763	10.3735	-0.01006	10.3735	-0.01248	10.3735		0.0061	18.4713	-0.00312	18.4713	-0.00014	18.4713			0.00828	18.0465	-0.00877	18.0465	-0.00945	18.0465		0.00605	19.2857	-0.00299	19.2857	6.89e-05	19.2857		0.00572	22.2446	-0.00187	22.2446	0.00198	22.2446
	0.00984	7.02125	-0.01403	7.02125	-0.01822	7.02125		0.00612	12.0571	-0.00577	12.0571	-0.00541	12.0571		0.00764	10.3442	-0.01011	10.3442	-0.01258	10.3442		0.0061	18.51	-0.00314	18.51	-0.000174	18.51			0.00831	17.9564	-0.00878	17.9564	-0.00945	17.9564		0.00606	19.293	-0.003	19.293	6e-05	19.293		0.00572	22.26	-0.00188	22.26	0.00197	22.26
	0.00986	6.99401	-0.01405	6.99401	-0.01824	6.99401		0.00613	12.0001	-0.0058	12.0001	-0.00546	12.0001		0.00765	10.3889	-0.01014	10.3889	-0.01263	10.3889		0.00612	18.5621	-0.00317	18.5621	-0.000229	18.5621			0.00833	17.9816	-0.00878	17.9816	-0.00945	17.9816		0.00606	19.347	-0.00301	19.347	4.11e-05	19.347		0.00574	22.3294	-0.00189	22.3294	0.00196	22.3294
	0.00987	6.94775	-0.01407	6.94775	-0.01827	6.94775		0.00614	11.9622	-0.00582	11.9622	-0.0055	11.9622		0.00765	10.3461	-0.01017	10.3461	-0.01268	10.3461		0.00613	18.5273	-0.0032	18.5273	-0.000273	18.5273			0.00834	17.9381	-0.00879	17.9381	-0.00945	17.9381		0.00607	19.3773	-0.00303	19.3773	1.34e-05	19.3773		0.00575	22.4238	-0.00191	22.4238	0.00193	22.4238
	0.00989	6.96825	-0.01409	6.96825	-0.01829	6.96825		0.00615	11.9478	-0.00584	11.9478	-0.00553	11.9478		0.00769	10.361	-0.01022	10.361	-0.01275	10.361		0.00613	18.56	-0.00323	18.56	-0.000327	18.56			0.00834	17.9642	-0.00879	17.9642	-0.00946	17.9642		0.00607	19.4195	-0.00304	19.4195	-5.47e-06	19.4195		0.00575	22.4687	-0.00192	22.4687	0.00192	22.4687
	0.00989	7.02481	-0.01411	7.02481	-0.01833	7.02481		0.00616	11.9813	-0.00587	11.9813	-0.00557	11.9813		0.00768	10.3111	-0.01025	10.3111	-0.01282	10.3111		0.00615	18.5251	-0.00325	18.5251	-0.000341	18.5251			0.00835	17.9472	-0.00879	17.9472	-0.00946	17.9472		0.0061	19.4469	-0.00305	19.4469	5.66e-06	19.4469		0.00577	22.5229	-0.00193	22.5229	0.00191	22.5229
	0.00992	7.00091	-0.01414	7.00091	-0.01836	7.00091		0.00617	11.9253	-0.00589	11.9253	-0.00562	11.9253		0.0077	10.3162	-0.01033	10.3162	-0.01297	10.3162		0.00615	18.5787	-0.00326	18.5787	-0.000375	18.5787			0.00837	17.8901	-0.00879	17.8901	-0.00945	17.8901		0.00611	19.5026	-0.00306	19.5026	-3.21e-06	19.5026		0.00577	22.5426	-0.00195	22.5426	0.00188	22.5426
	0.00994	7.00638	-0.01416	7.00638	-0.01838	7.00638		0.00618	11.8806	-0.00592	11.8806	-0.00566	11.8806		0.0077	10.271	-0.01039	10.271	-0.01308	10.271		0.00617	18.6236	-0.0033	18.6236	-0.000428	18.6236			0.00837	17.8538	-0.0088	17.8538	-0.00946	17.8538		0.00611	19.5179	-0.00307	19.5179	-2.21e-05	19.5179		0.00578	22.545	-0.00195	22.545	0.00189	22.545
	0.00995	7.03095	-0.01417	7.03095	-0.01839	7.03095		0.00618	11.8235	-0.00594	11.8235	-0.00571	11.8235		0.00773	10.2731	-0.01042	10.2731	-0.0131	10.2731		0.00617	18.632	-0.00333	18.632	-0.000482	18.632			0.00841	17.8449	-0.0088	17.8449	-0.00945	17.8449		0.00612	19.5112	-0.00308	19.5112	-3.09e-05	19.5112		0.00578	22.5438	-0.00196	22.5438	0.00186	22.5438
	0.00997	7.10222	-0.0142	7.10222	-0.01843	7.10222		0.0062	11.7852	-0.00596	11.7852	-0.00573	11.7852		0.00775	10.2622	-0.01047	10.2622	-0.01319	10.2622		0.00618	18.6053	-0.00335	18.6053	-0.000526	18.6053			0.00842	17.8634	-0.00881	17.8634	-0.00945	17.8634		0.00613	19.557	-0.00308	19.557	-3.98e-05	19.557		0.00581	22.5347	-0.00197	22.5347	0.00187	22.5347
	0.00997	7.10466	-0.01421	7.10466	-0.01845	7.10466		0.00621	11.8211	-0.00599	11.8211	-0.00578	11.8211		0.00775	10.2382	-0.01053	10.2382	-0.01331	10.2382		0.00619	18.632	-0.00337	18.632	-0.00055	18.632			0.00842	17.8396	-0.00882	17.8396	-0.00946	17.8396		0.00613	19.626	-0.00309	19.626	-5.87e-05	19.626		0.0058	22.5609	-0.00198	22.5609	0.00183	22.5609
	0.01002	7.03518	-0.01424	7.03518	-0.01846	7.03518		0.00622	11.7543	-0.00602	11.7543	-0.00582	11.7543		0.00775	10.2673	-0.01056	10.2673	-0.01336	10.2673		0.0062	18.6261	-0.00342	18.6261	-0.000634	18.6261			0.00842	17.7589	-0.00882	17.7589	-0.00946	17.7589		0.00615	19.6253	-0.0031	19.6253	-5.75e-05	19.6253		0.00582	22.6152	-0.002	22.6152	0.00182	22.6152
	0.01005	7.0424	-0.01426	7.0424	-0.01847	7.0424		0.00623	11.7994	-0.00605	11.7994	-0.00586	11.7994		0.00776	10.1901	-0.01058	10.1901	-0.01341	10.1901		0.00622	18.618	-0.00343	18.618	-0.000649	18.618			0.00846	17.7412	-0.00883	17.7412	-0.00946	17.7412		0.00616	19.6447	-0.0031	19.6447	-4.75e-05	19.6447		0.00582	22.6636	-0.00201	22.6636	0.0018	22.6636
	0.01005	7.0575	-0.01429	7.0575	-0.01853	7.0575		0.00623	11.7942	-0.00607	11.7942	-0.00591	11.7942		0.00777	10.2175	-0.01061	10.2175	-0.01345	10.2175		0.00622	18.6124	-0.00347	18.6124	-0.000723	18.6124			0.00845	17.7803	-0.00883	17.7803	-0.00948	17.7803		0.00618	19.6431	-0.00311	19.6431	-4.64e-05	19.6431		0.00583	22.65	-0.00203	22.65	0.00177	22.65
	0.01005	7.05189	-0.01432	7.05189	-0.01859	7.05189		0.00626	11.7838	-0.0061	11.7838	-0.00593	11.7838		0.0078	10.1956	-0.01067	10.1956	-0.01353	10.1956		0.00622	18.5933	-0.00348	18.5933	-0.0007365	18.5933			0.00846	17.6976	-0.00883	17.6976	-0.00948	17.6976		0.00618	19.6767	-0.00311	19.6767	-4.64e-05	19.6767		0.00583	22.708	-0.00205	22.708	0.00174	22.708
	0.01005	6.98566	-0.01434	6.98566	-0.01863	6.98566		0.00628	11.775	-0.00612	11.775	-0.00595	11.775		0.0078	10.1654	-0.01072	10.1654	-0.01364	10.1654		0.00624	18.5882	-0.00352	18.5882	-0.0007905	18.5882			0.00846	17.6985	-0.00884	17.6985	-0.00948	17.6985		0.0062	19.7147	-0.00312	19.7147	-4.53e-05	19.7147		0.00584	22.7787	-0.00206	22.7787	0.00172	22.7787
	0.0101	7.07784	-0.01437	7.07784	-0.01864	7.07784		0.00628	11.7652	-0.00614	11.7652	-0.00601	11.7652		0.00784	10.1371	-0.01075	10.1371	-0.01366	10.1371		0.00626	18.5928	-0.00353	18.5928	-0.0008045	18.5928			0.0085	17.6844	-0.00885	17.6844	-0.00948	17.6844		0.00619	19.767	-0.00313	19.767	-7.42e-05	19.767		0.00587	22.8158	-0.00207	22.8158	0.00173	22.8158
	0.0101	7.02979	-0.01439	7.02979	-0.01868	7.02979		0.00628	11.7064	-0.00617	11.7064	-0.00606	11.7064		0.00784	10.1219	-0.01081	10.1219	-0.01377	10.1219		0.00625	18.5933	-0.00356	18.5933	-0.0008685	18.5933			0.00853	17.6236	-0.00885	17.6236	-0.00946	17.6236		0.0062	19.7994	-0.00314	19.7994	-8.3e-05	19.7994		0.00587	22.8487	-0.00208	22.8487	0.00172	22.8487
	0.0101	7.10439	-0.01442	7.10439	-0.01874	7.10439		0.00628	11.7311	-0.00619	11.7311	-0.00611	11.7311		0.00785	10.1019	-0.01083	10.1019	-0.01382	10.1019		0.00627	18.5824	-0.00359	18.5824	-0.0009025	18.5824			0.0085	17.6792	-0.00886	17.6792	-0.00949	17.6792		0.00622	19.8322	-0.00315	19.8322	-8.19e-05	19.8322		0.00588	22.8703	-0.00209	22.8703	0.0017	22.8703
	0.01013	7.01176	-0.01444	7.01176	-0.01875	7.01176		0.00631	11.7624	-0.00622	11.7624	-0.00614	11.7624		0.00785	10.0958	-0.01089	10.0958	-0.01393	10.0958		0.00628	18.5944	-0.00361	18.5944	-0.0009465	18.5944			0.00853	17.6479	-0.00887	17.6479	-0.00949	17.6479		0.00623	19.848	-0.00316	19.848	-9.08e-05	19.848		0.00589	22.8838	-0.00211	22.8838	0.00167	22.8838
	0.01014	6.96783	-0.01446	6.96783	-0.01878	6.96783		0.00631	11.6962	-0.00625	11.6962	-0.00619	11.6962		0.00787	10.0462	-0.01092	10.0462	-0.01396	10.0462		0.0063	18.615	-0.00364	18.615	-0.0009805	18.615			0.00855	17.6439	-0.00887	17.6439	-0.00949	17.6439		0.00624	19.8666	-0.00316	19.8666	-8.08e-05	19.8666		0.0059	22.8961	-0.00212	22.8961	0.00165	22.8961
	0.01018	7.01665	-0.01449	7.01665	-0.0188	7.01665		0.00631	11.6842	-0.00628	11.6842	-0.00624	11.6842		0.00789	10.0189	-0.01094	10.0189	-0.014	10.0189		0.00631	18.6085	-0.00368	18.6085	-0.00104	18.6085			0.00859	17.5323	-0.00887	17.5323	-0.00948	17.5323		0.00626	19.9383	-0.00317	19.9383	-7.96e-05	19.9383		0.00591	22.9838	-0.00214	22.9838	0.00163	22.9838
	0.01019	7.04572	-0.01452	7.04572	-0.01885	7.04572		0.00633	11.6636	-0.0063	11.6636	-0.00626	11.6636		0.00789	10.0042	-0.011	10.0042	-0.01411	10.0042		0.0063	18.6421	-0.00369	18.6421	-0.00109	18.6421			0.00857	17.5364	-0.00887	17.5364	-0.00949	17.5364		0.00626	19.932	-0.00318	19.932	-9.85e-05	19.932		0.0059	22.9609	-0.00215	22.9609	0.00161	22.9609
	0.01019	6.96169	-0.01454	6.96169	-0.01889	6.96169		0.00634	11.6113	-0.00632	11.6113	-0.0063	11.6113		0.0079	9.99926	-0.01106	9.99926	-0.01421	9.99926		0.00632	18.6511	-0.00372	18.6511	-0.00112	18.6511			0.00859	17.4687	-0.00888	17.4687	-0.00949	17.4687		0.00626	19.9684	-0.00319	19.9684	-0.000117	19.9684		0.00593	23.0304	-0.00216	23.0304	0.00161	23.0304
	0.01019	6.97961	-0.01456	6.97961	-0.01893	6.97961		0.00636	11.5822	-0.00635	11.5822	-0.00634	11.5822		0.00794	9.96368	-0.01111	9.96368	-0.01428	9.96368		0.00632	18.6545	-0.00374	18.6545	-0.00116	18.6545			0.0086	17.4984	-0.00888	17.4984	-0.00949	17.4984		0.00628	20.0019	-0.0032	20.0019	-0.000116	20.0019		0.00593	23.0739	-0.00217	23.0739	0.00159	23.0739
	0.01022	6.97537	-0.01459	6.97537	-0.01896	6.97537		0.00637	11.592	-0.00637	11.592	-0.00637	11.592		0.00794	9.91468	-0.01117	9.91468	-0.01439	9.91468		0.00633	18.6249	-0.00376	18.6249	-0.00118	18.6249			0.00863	17.4452	-0.00889	17.4452	-0.00948	17.4452		0.0063	20.0493	-0.00321	20.0493	-0.000115	20.0493		0.00596	23.0775	-0.00219	23.0775	0.00158	23.0775
	0.01024	7.01361	-0.01462	7.01361	-0.019	7.01361		0.00637	11.6329	-0.0064	11.6329	-0.00643	11.6329		0.00794	9.94406	-0.01119	9.94406	-0.01445	9.94406		0.00634	18.6158	-0.00379	18.6158	-0.00124	18.6158			0.00863	17.486	-0.0089	17.486	-0.00949	17.486		0.0063	20.0382	-0.00321	20.0382	-0.000115	20.0382		0.00594	23.1083	-0.0022	23.1083	0.00154	23.1083
	0.01026	7.07869	-0.01464	7.07869	-0.01902	7.07869		0.00637	11.6161	-0.00642	11.6161	-0.00648	11.6161		0.00795	9.93581	-0.01125	9.93581	-0.01455	9.93581		0.00636	18.5997	-0.0038	18.5997	-0.00124	18.5997			0.00864	17.442	-0.0089	17.442	-0.00949	17.442		0.0063	20.0806	-0.00322	20.0806	-0.000134	20.0806		0.00597	23.2145	-0.00222	23.2145	0.00154	23.2145
	0.01026	7.0412	-0.01466	7.0412	-0.01906	7.0412		0.00639	11.6056	-0.00644	11.6056	-0.0065	11.6056		0.00796	9.9437	-0.01128	9.9437	-0.0146	9.9437		0.00637	18.5828	-0.00385	18.5828	-0.00132	18.5828			0.00864	17.4599	-0.0089	17.4599	-0.0095	17.4599		0.00631	20.1195	-0.00323	20.1195	-0.000143	20.1195		0.00597	23.2363	-0.00223	23.2363	0.00151	23.2363
	0.01029	7.0431	-0.01468	7.0431	-0.01907	7.0431		0.0064	11.6204	-0.00647	11.6204	-0.00654	11.6204		0.00797	9.90554	-0.01131	9.90554	-0.01464	9.90554		0.00637	18.605	-0.00387	18.605	-0.00138	18.605			0.00867	17.4193	-0.00891	17.4193	-0.0095	17.4193		0.00632	20.1143	-0.00324	20.1143	-0.000152	20.1143		0.00597	23.2666	-0.00223	23.2666	0.00151	23.2666
	0.01029	6.96348	-0.01471	6.96348	-0.01913	6.96348		0.00641	11.6188	-0.00649	11.6188	-0.00658	11.6188		0.00799	9.90606	-0.01136	9.90606	-0.01473	9.90606		0.00639	18.6023	-0.0039	18.6023	-0.00141	18.6023			0.00867	17.3607	-0.00891	17.3607	-0.00951	17.3607		0.00634	20.1764	-0.00325	20.1764	-0.000151	20.1764		0.00598	23.3793	-0.00224	23.3793	0.0015	23.3793
	0.0103	7.00425	-0.01474	7.00425	-0.01918	7.00425		0.00641	11.6512	-0.00652	11.6512	-0.00663	11.6512		0.00799	9.84609	-0.01142	9.84609	-0.01484	9.84609		0.00639	18.6456	-0.00392	18.6456	-0.00144	18.6456			0.0087	17.3733	-0.00892	17.3733	-0.0095	17.3733		0.00634	20.2439	-0.00325	20.2439	-0.000169	20.2439		0.006	23.3369	-0.00225	23.3369	0.00149	23.3369
	0.01034	7.01591	-0.01477	7.01591	-0.0192	7.01591		0.00643	11.5626	-0.00655	11.5626	-0.00667	11.5626		0.00801	9.85268	-0.01147	9.85268	-0.01493	9.85268		0.00641	18.5773	-0.00395	18.5773	-0.0015	18.5773			0.00872	17.3352	-0.00893	17.3352	-0.00949	17.3352		0.00636	20.1963	-0.00325	20.1963	-0.000149	20.1963		0.006	23.4004	-0.00227	23.4004	0.00146	23.4004
	0.01032	6.99136	-0.0148	6.99136	-0.01928	6.99136		0.00643	11.5142	-0.00657	11.5142	-0.00671	11.5142		0.00802	9.83376	-0.01153	9.83376	-0.01504	9.83376		0.00642	18.5995	-0.00397	18.5995	-0.00152	18.5995			0.00874	17.3575	-0.00893	17.3575	-0.0095	17.3575		0.00637	20.2555	-0.00326	20.2555	-0.000158	20.2555		0.00602	23.4295	-0.00228	23.4295	0.00147	23.4295
	0.01034	7.01725	-0.01482	7.01725	-0.0193	7.01725		0.00644	11.5152	-0.0066	11.5152	-0.00675	11.5152		0.00804	9.81982	-0.01158	9.81982	-0.01513	9.81982		0.00642	18.6106	-0.00401	18.6106	-0.0016	18.6106			0.00874	17.3382	-0.00894	17.3382	-0.00951	17.3382		0.00637	20.3331	-0.00327	20.3331	-0.000177	20.3331		0.00603	23.4371	-0.00229	23.4371	0.00145	23.4371
	0.01037	7.03295	-0.01485	7.03295	-0.01933	7.03295		0.00646	11.5639	-0.00663	11.5639	-0.0068	11.5639		0.00804	9.80146	-0.01161	9.80146	-0.01518	9.80146		0.00644	18.5639	-0.00404	18.5639	-0.00163	18.5639			0.00877	17.2597	-0.00894	17.2597	-0.0095	17.2597		0.00639	20.319	-0.00328	20.319	-0.000176	20.319		0.00604	23.4537	-0.0023	23.4537	0.00144	23.4537
	0.0104	7.01791	-0.01487	7.01791	-0.01934	7.01791		0.00645	11.6004	-0.00666	11.6004	-0.00687	11.6004		0.00806	9.78008	-0.01164	9.78008	-0.01522	9.78008		0.00645	18.5518	-0.00405	18.5518	-0.00165	18.5518			0.00877	17.2666	-0.00894	17.2666	-0.00951	17.2666		0.0064	20.3959	-0.00329	20.3959	-0.000185	20.3959		0.00603	23.5194	-0.00232	23.5194	0.0014	23.5194
	0.0104	6.99817	-0.01489	6.99817	-0.01938	6.99817		0.00646	11.6113	-0.00668	11.6113	-0.0069	11.6113		0.00807	9.76527	-0.01169	9.76527	-0.01532	9.76527		0.00645	18.5616	-0.00409	18.5616	-0.00173	18.5616			0.00878	17.2146	-0.00895	17.2146	-0.00951	17.2146		0.0064	20.3879	-0.0033	20.3879	-0.000204	20.3879		0.00606	23.5318	-0.00233	23.5318	0.0014	23.5318
	0.01043	7.04479	-0.01491	7.04479	-0.01939	7.04479		0.00648	11.5178	-0.0067	11.5178	-0.00693	11.5178		0.00809	9.78802	-0.01172	9.78802	-0.01535	9.78802		0.00646	18.5745	-0.00411	18.5745	-0.00175	18.5745			0.00879	17.1943	-0.00896	17.1943	-0.00951	17.1943		0.00641	20.4787	-0.00331	20.4787	-0.000213	20.4787		0.00607	23.5488	-0.00234	23.5488	0.00139	23.5488
	0.01045	6.97388	-0.01494	6.97388	-0.01943	6.97388		0.0065	11.5038	-0.00672	11.5038	-0.00695	11.5038		0.0081	9.77389	-0.01178	9.77389	-0.01546	9.77389		0.00646	18.5201	-0.00413	18.5201	-0.00181	18.5201			0.00879	17.1903	-0.00896	17.1903	-0.00952	17.1903		0.00642	20.4863	-0.00332	20.4863	-0.000222	20.4863		0.00607	23.567	-0.00235	23.567	0.00136	23.567
	0.01043	7.04968	-0.01496	7.04968	-0.01949	7.04968		0.0065	11.5331	-0.00675	11.5331	-0.007	11.5331		0.00812	9.77235	-0.01183	9.77235	-0.01555	9.77235		0.00647	18.5604	-0.00416	18.5604	-0.00185	18.5604			0.00881	17.1586	-0.00897	17.1586	-0.00952	17.1586		0.00643	20.5027	-0.00333	20.5027	-0.00023	20.5027		0.00607	23.6475	-0.00237	23.6475	0.00133	23.6475
	0.01046	7.04695	-0.01499	7.04695	-0.01952	7.04695		0.00652	11.5508	-0.00678	11.5508	-0.00703	11.5508		0.00812	9.71674	-0.01189	9.71674	-0.01566	9.71674		0.0065	18.5629	-0.00419	18.5629	-0.00187	18.5629			0.00883	17.1292	-0.00898	17.1292	-0.00952	17.1292		0.00643	20.5354	-0.00334	20.5354	-0.000249	20.5354		0.00609	23.635	-0.00238	23.635	0.00132	23.635
	0.01048	6.99431	-0.01501	6.99431	-0.01954	6.99431		0.00653	11.4517	-0.00681	11.4517	-0.00708	11.4517		0.00814	9.68498	-0.01192	9.68498	-0.01569	9.68498		0.0065	18.5679	-0.00422	18.5679	-0.00195	18.5679			0.00885	17.1042	-0.00898	17.1042	-0.00952	17.1042		0.00645	20.5666	-0.00335	20.5666	-0.000248	20.5666		0.0061	23.6848	-0.00239	23.6848	0.00132	23.6848
	0.0105	6.98404	-0.01503	6.98404	-0.01956	6.98404		0.00652	11.5074	-0.00683	11.5074	-0.00713	11.5074		0.00815	9.67164	-0.01194	9.67164	-0.01574	9.67164		0.00652	18.5382	-0.00425	18.5382	-0.00198	18.5382			0.00888	17.066	-0.00898	17.066	-0.00952	17.066		0.00645	20.5616	-0.00335	20.5616	-0.000248	20.5616		0.00611	23.7439	-0.00241	23.7439	0.00129	23.7439
	0.0105	6.97013	-0.01505	6.97013	-0.0196	6.97013		0.00654	11.4397	-0.00685	11.4397	-0.00716	11.4397		0.00817	9.6224	-0.012	9.6224	-0.01583	9.6224		0.00652	18.5308	-0.00427	18.5308	-0.00202	18.5308			0.00886	17.0786	-0.00899	17.0786	-0.00954	17.0786		0.00647	20.6002	-0.00336	20.6002	-0.000247	20.6002		0.0061	23.7596	-0.00242	23.7596	0.00127	23.7596
	0.01053	6.96041	-0.01508	6.96041	-0.01963	6.96041		0.00655	11.4843	-0.00688	11.4843	-0.00721	11.4843		0.00817	9.6007	-0.01206	9.6007	-0.01594	9.6007		0.00653	18.5474	-0.00431	18.5474	-0.00208	18.5474			0.00889	17.051	-0.009	17.051	-0.00954	17.051		0.00649	20.6469	-0.00337	20.6469	-0.000246	20.6469		0.00612	23.7544	-0.00242	23.7544	0.00127	23.7544
	0.01053	6.98224	-0.0151	6.98224	-0.01967	6.98224		0.00656	11.4393	-0.00691	11.4393	-0.00726	11.4393		0.0082	9.60451	-0.01211	9.60451	-0.01602	9.60451		0.00654	18.515	-0.00432	18.515	-0.0021	18.515			0.00889	16.9951	-0.009	16.9951	-0.00954	16.9951		0.00649	20.6569	-0.00338	20.6569	-0.000265	20.6569		0.00613	23.7681	-0.00244	23.7681	0.00125	23.7681
	0.01058	6.99483	-0.01512	6.99483	-0.01966	6.99483		0.00656	11.4126	-0.00693	11.4126	-0.00731	11.4126		0.0082	9.54897	-0.01214	9.54897	-0.01608	9.54897		0.00654	18.5255	-0.00436	18.5255	-0.00218	18.5255			0.00892	16.9573	-0.00901	16.9573	-0.00954	16.9573		0.00649	20.6598	-0.00339	20.6598	-0.000284	20.6598		0.00614	23.8349	-0.00245	23.8349	0.00125	23.8349
	0.01058	6.93921	-0.01514	6.93921	-0.0197	6.93921		0.00658	11.4259	-0.00696	11.4259	-0.00734	11.4259		0.00822	9.50104	-0.01219	9.50104	-0.01617	9.50104		0.00656	18.4837	-0.00438	18.4837	-0.00219	18.4837			0.00893	16.9666	-0.00902	16.9666	-0.00954	16.9666		0.00651	20.6691	-0.00339	20.6691	-0.000264	20.6691		0.00615	23.9039	-0.00246	23.9039	0.00123	23.9039
	0.01059	6.91842	-0.01517	6.91842	-0.01975	6.91842		0.00658	11.3373	-0.00699	11.3373	-0.0074	11.3373		0.00822	9.48271	-0.01222	9.48271	-0.01622	9.48271		0.00656	18.4606	-0.00441	18.4606	-0.00227	18.4606			0.00893	16.9668	-0.00902	16.9668	-0.00955	16.9668		0.00652	20.7141	-0.0034	20.7141	-0.000272	20.7141		0.00616	23.897	-0.00247	23.897	0.00122	23.897
	0.01061	6.99278	-0.01519	6.99278	-0.01977	6.99278		0.00661	11.3234	-0.00702	11.3234	-0.00742	11.3234		0.00822	9.44688	-0.01228	9.44688	-0.01634	9.44688		0.00658	18.4755	-0.00444	18.4755	-0.0023	18.4755			0.00896	16.9489	-0.00903	16.9489	-0.00955	16.9489		0.00654	20.6749	-0.00341	20.6749	-0.000271	20.6749		0.00618	23.9238	-0.00248	23.9238	0.00121	23.9238
	0.01062	6.91471	-0.01522	6.91471	-0.01982	6.91471		0.00661	11.316	-0.00704	11.316	-0.00746	11.316		0.00823	9.44097	-0.01231	9.44097	-0.01638	9.44097		0.00658	18.4574	-0.00447	18.4574	-0.00235	18.4574			0.00897	16.8661	-0.00903	16.8661	-0.00955	16.8661		0.00653	20.7343	-0.00342	20.7343	-0.0003	20.7343		0.00618	24.0003	-0.0025	24.0003	0.00118	24.0003
	0.01062	6.89633	-0.01525	6.89633	-0.01988	6.89633		0.00662	11.3778	-0.00706	11.3778	-0.0075	11.3778		0.00825	9.42858	-0.01236	9.42858	-0.01647	9.42858		0.0066	18.4425	-0.00448	18.4425	-0.00237	18.4425			0.00897	16.8817	-0.00904	16.8817	-0.00956	16.8817		0.00654	20.7973	-0.00342	20.7973	-0.000309	20.7973		0.00618	24.0459	-0.00252	24.0459	0.00115	24.0459
	0.01066	6.92751	-0.01527	6.92751	-0.01988	6.92751		0.00663	11.3526	-0.00709	11.3526	-0.00754	11.3526		0.00827	9.40744	-0.01242	9.40744	-0.01656	9.40744		0.0066	18.4529	-0.00451	18.4529	-0.00242	18.4529			0.00899	16.8264	-0.00905	16.8264	-0.00956	16.8264		0.00656	20.7843	-0.00342	20.7843	-0.000289	20.7843		0.0062	24.0356	-0.00252	24.0356	0.00115	24.0356
	0.01066	6.89895	-0.01531	6.89895	-0.01996	6.89895		0.00664	11.4149	-0.00711	11.4149	-0.00758	11.4149		0.00827	9.38271	-0.01247	9.38271	-0.01667	9.38271		0.00662	18.433	-0.00453	18.433	-0.00244	18.433			0.00903	16.853	-0.00906	16.853	-0.00955	16.853		0.00657	20.8119	-0.00343	20.8119	-0.000298	20.8119		0.00621	24.087	-0.00253	24.087	0.00115	24.087
	0.01069	6.87373	-0.01533	6.87373	-0.01997	6.87373		0.00664	11.2972	-0.00713	11.2972	-0.00762	11.2972		0.00828	9.33363	-0.01253	9.33363	-0.01678	9.33363		0.00662	18.4611	-0.00455	18.4611	-0.00247	18.4611			0.00901	16.715	-0.00906	16.715	-0.00956	16.715		0.00658	20.8419	-0.00344	20.8419	-0.000307	20.8419		0.00622	24.1012	-0.00255	24.1012	0.00113	24.1012
	0.01067	6.92023	-0.01536	6.92023	-0.02005	6.92023		0.00666	11.3507	-0.00715	11.3507	-0.00765	11.3507		0.0083	9.24829	-0.01258	9.24829	-0.01687	9.24829		0.00662	18.4145	-0.00456	18.4145	-0.0025	18.4145			0.00903	16.6847	-0.00906	16.6847	-0.00956	16.6847		0.00658	20.8685	-0.00345	20.8685	-0.000326	20.8685		0.00622	24.1957	-0.00255	24.1957	0.00111	24.1957
	0.01074	6.91763	-0.0154	6.91763	-0.02006	6.91763		0.00666	11.3368	-0.00717	11.3368	-0.00769	11.3368		0.00831	9.20706	-0.01261	9.20706	-0.01691	9.20706		0.00664	18.3534	-0.00458	18.3534	-0.00252	18.3534			0.00904	16.7305	-0.00906	16.7305	-0.00957	16.7305		0.00659	20.8717	-0.00346	20.8717	-0.000335	20.8717		0.00623	24.168	-0.00257	24.168	0.00109	24.168
	0.01072	6.87604	-0.01543	6.87604	-0.02014	6.87604		0.00668	11.2725	-0.0072	11.2725	-0.00772	11.2725		0.00833	9.13199	-0.01267	9.13199	-0.017	9.13199		0.00665	18.3344	-0.0046	18.3344	-0.00254	18.3344			0.00904	16.7279	-0.00907	16.7279	-0.00958	16.7279		0.0066	20.8679	-0.00346	20.8679	-0.000325	20.8679		0.00622	24.2259	-0.00258	24.2259	0.00105	24.2259
	0.01074	6.85525	-0.01547	6.85525	-0.0202	6.85525		0.00667	11.3526	-0.00722	11.3526	-0.00778	11.3526		0.00833	9.06671	-0.01272	9.06671	-0.01711	9.06671		0.00666	18.2737	-0.0046	18.2737	-0.00255	18.2737			0.00905	16.7265	-0.00908	16.7265	-0.00958	16.7265		0.00662	20.9205	-0.00347	20.9205	-0.000323	20.9205		0.00625	24.2984	-0.0026	24.2984	0.00105	24.2984
	0.01077	6.84048	-0.01551	6.84048	-0.02025	6.84048		0.00671	11.2533	-0.00724	11.2533	-0.00778	11.2533		0.00833	9.03554	-0.01281	9.03554	-0.01728	9.03554		0.00668	18.1652	-0.00462	18.1652	-0.00256	18.1652			0.00912	16.6767	-0.00908	16.6767	-0.00956	16.6767		0.00662	20.9621	-0.00348	20.9621	-0.000342	20.9621		0.00626	24.3138	-0.00262	24.3138	0.00103	24.3138
	0.0108	6.80014	-0.01555	6.80014	-0.0203	6.80014		0.0067	11.3216	-0.00727	11.3216	-0.00784	11.3216		0.00836	9.02294	-0.01289	9.02294	-0.01742	9.02294		0.00668	18.0689	-0.00463	18.0689	-0.00257	18.0689			0.0091	16.6958	-0.00909	16.6958	-0.00958	16.6958		0.00664	21.0094	-0.00349	21.0094	-0.000341	21.0094		0.00627	24.3225	-0.00262	24.3225	0.00102	24.3225
	0.01078	6.75487	-0.01559	6.75487	-0.0204	6.75487		0.00671	11.2604	-0.00729	11.2604	-0.00787	11.2604		0.00838	8.97848	-0.01294	8.97848	-0.01751	8.97848		0.00669	18.0581	-0.00464	18.0581	-0.0026	18.0581			0.00911	16.657	-0.0091	16.657	-0.00958	16.657		0.00664	21.0423	-0.0035	21.0423	-0.00036	21.0423		0.00628	24.3262	-0.00264	24.3262	0.001	24.3262
	0.01077	6.78351	-0.01562	6.78351	-0.02047	6.78351		0.00673	11.1614	-0.00731	11.1614	-0.00789	11.1614		0.00838	8.97194	-0.01303	8.97194	-0.01768	8.97194		0.00671	17.9392	-0.00467	17.9392	-0.00263	17.9392			0.00914	16.651	-0.0091	16.651	-0.00958	16.651		0.00665	21.038	-0.00351	21.038	-0.000369	21.038		0.00629	24.3887	-0.00265	24.3887	0.000998	24.3887
	0.01085	6.78973	-0.01566	6.78973	-0.02047	6.78973		0.00675	11.2435	-0.00734	11.2435	-0.00792	11.2435		0.00838	8.94913	-0.01308	8.94913	-0.01779	8.94913		0.00671	17.9209	-0.00469	17.9209	-0.00267	17.9209			0.00915	16.615	-0.0091	16.615	-0.00958	16.615		0.00666	21.1124	-0.00352	21.1124	-0.000378	21.1124		0.00629	24.4461	-0.00265	24.4461	0.000982	24.4461
	0.01086	6.78176	-0.0157	6.78176	-0.02054	6.78176		0.00674	11.2448	-0.00736	11.2448	-0.00797	11.2448		0.00841	8.93448	-0.01314	8.93448	-0.01787	8.93448		0.00672	17.8275	-0.00471	17.8275	-0.00269	17.8275			0.00915	16.6347	-0.00911	16.6347	-0.00959	16.6347		0.00668	21.1296	-0.00353	21.1296	-0.000377	21.1296		0.00631	24.5091	-0.00268	24.5091	0.000956	24.5091
	0.0109	6.75891	-0.01573	6.75891	-0.02056	6.75891		0.00673	11.2078	-0.00738	11.2078	-0.00804	11.2078		0.00843	8.90397	-0.01319	8.90397	-0.01796	8.90397		0.00673	17.8232	-0.00473	17.8232	-0.00273	17.8232			0.00915	16.6337	-0.00911	16.6337	-0.00959	16.6337		0.00669	21.1453	-0.00354	21.1453	-0.000385	21.1453		0.00632	24.5426	-0.00268	24.5426	0.000951	24.5426
	0.01088	6.71594	-0.01576	6.71594	-0.02064	6.71594		0.00678	11.209	-0.0074	11.209	-0.00803	11.209		0.00843	8.9176	-0.01325	8.9176	-0.01807	8.9176		0.00673	17.7591	-0.00474	17.7591	-0.00275	17.7591			0.00918	16.5557	-0.00912	16.5557	-0.00958	16.5557		0.00668	21.1823	-0.00356	21.1823	-0.000433	21.1823		0.00632	24.56	-0.0027	24.56	0.00092	24.56
	0.01091	6.76076	-0.0158	6.76076	-0.02069	6.76076		0.00679	11.2055	-0.00742	11.2055	-0.00805	11.2055		0.00843	8.92431	-0.01331	8.92431	-0.01818	8.92431		0.00676	17.7577	-0.00478	17.7577	-0.00279	17.7577			0.00919	16.5862	-0.00912	16.5862	-0.00958	16.5862		0.0067	21.2321	-0.00357	21.2321	-0.000432	21.2321		0.00634	24.612	-0.00271	24.612	0.000925	24.612
	0.0109	6.68535	-0.01583	6.68535	-0.02076	6.68535		0.00681	11.2813	-0.00744	11.2813	-0.00807	11.2813		0.00843	8.91457	-0.01333	8.91457	-0.01824	8.91457		0.00677	17.6866	-0.00478	17.6866	-0.0028	17.6866			0.0092	16.5513	-0.00913	16.5513	-0.00958	16.5513		0.00671	21.208	-0.00358	21.208	-0.000441	21.208		0.00634	24.636	-0.00272	24.636	0.000894	24.636
	0.0109	6.72135	-0.01585	6.72135	-0.0208	6.72135		0.0068	11.1129	-0.00746	11.1129	-0.00813	11.1129		0.00848	8.87579	-0.01342	8.87579	-0.01835	8.87579		0.00677	17.6857	-0.00482	17.6857	-0.00287	17.6857			0.00919	16.5402	-0.00913	16.5402	-0.0096	16.5402		0.00672	21.2569	-0.00359	21.2569	-0.000469	21.2569		0.00635	24.6201	-0.00274	24.6201	0.000873	24.6201
	0.01093	6.67592	-0.01588	6.67592	-0.02083	6.67592		0.00682	11.1359	-0.00748	11.1359	-0.00815	11.1359		0.00848	8.88992	-0.01344	8.88992	-0.01841	8.88992		0.00678	17.627	-0.00484	17.627	-0.00289	17.627			0.00923	16.6088	-0.00913	16.6088	-0.00959	16.6088		0.00671	21.3208	-0.0036	21.3208	-0.000498	21.3208		0.00635	24.7095	-0.00275	24.7095	0.000858	24.7095
	0.01093	6.73131	-0.01591	6.73131	-0.02089	6.73131		0.00681	11.181	-0.00751	11.181	-0.0082	11.181		0.00851	8.88139	-0.0135	8.88139	-0.01849	8.88139		0.00679	17.6137	-0.00485	17.6137	-0.00292	17.6137			0.00925	16.5721	-0.00913	16.5721	-0.00958	16.5721		0.00673	21.3587	-0.00362	21.3587	-0.000515	21.3587		0.00637	24.6522	-0.00275	24.6522	0.000862	24.6522
	0.01098	6.69386	-0.01594	6.69386	-0.0209	6.69386		0.00681	11.1625	-0.00753	11.1625	-0.00824	11.1625		0.00851	8.83243	-0.01356	8.83243	-0.0186	8.83243		0.0068	17.5624	-0.00487	17.5624	-0.00294	17.5624			0.00927	16.5277	-0.00913	16.5277	-0.00958	16.5277		0.00675	21.3684	-0.00363	21.3684	-0.000514	21.3684		0.00638	24.6883	-0.00277	24.6883	0.000842	24.6883
	0.01099	6.63144	-0.01597	6.63144	-0.02095	6.63144		0.00683	11.2237	-0.00755	11.2237	-0.00827	11.2237		0.00852	8.86706	-0.01361	8.86706	-0.0187	8.86706		0.00681	17.5294	-0.0049	17.5294	-0.00299	17.5294			0.00925	16.4851	-0.00914	16.4851	-0.00959	16.4851		0.00675	21.3682	-0.00365	21.3682	-0.000552	21.3682		0.00638	24.7476	-0.00278	24.7476	0.000811	24.7476
	0.01101	6.70092	-0.01599	6.70092	-0.02097	6.70092		0.00683	11.2574	-0.00757	11.2574	-0.0083	11.2574		0.00853	8.83449	-0.01367	8.83449	-0.0188	8.83449		0.00682	17.5344	-0.00492	17.5344	-0.00301	17.5344			0.00929	16.5367	-0.00914	16.5367	-0.00958	16.5367		0.00677	21.4001	-0.00367	21.4001	-0.00057	21.4001		0.00639	24.7814	-0.0028	24.7814	0.00079	24.7814
	0.01102	6.63968	-0.01602	6.63968	-0.02102	6.63968		0.00686	11.2541	-0.00759	11.2541	-0.00831	11.2541		0.00854	8.80542	-0.01369	8.80542	-0.01885	8.80542		0.00682	17.4688	-0.00493	17.4688	-0.00304	17.4688			0.00929	16.5416	-0.00915	16.5416	-0.00959	16.5416		0.00677	21.4163	-0.00367	21.4163	-0.00057	21.4163		0.00641	24.8412	-0.00281	24.8412	0.000795	24.8412
	0.01104	6.63536	-0.01605	6.63536	-0.02106	6.63536		0.00687	11.1513	-0.00761	11.1513	-0.00834	11.1513		0.00854	8.80761	-0.01375	8.80761	-0.01896	8.80761		0.00684	17.4174	-0.00496	17.4174	-0.00308	17.4174			0.0093	16.5037	-0.00915	16.5037	-0.00958	16.5037		0.00677	21.4066	-0.00369	21.4066	-0.000607	21.4066		0.00643	24.8587	-0.00282	24.8587	0.000799	24.8587
	0.01104	6.63221	-0.01607	6.63221	-0.0211	6.63221		0.00688	11.1199	-0.00763	11.1199	-0.00839	11.1199		0.00857	8.79663	-0.01381	8.79663	-0.01904	8.79663		0.00685	17.3997	-0.00499	17.3997	-0.00312	17.3997			0.00931	16.4657	-0.00916	16.4657	-0.00958	16.4657		0.00679	21.4722	-0.0037	21.4722	-0.000606	21.4722		0.00643	24.9146	-0.00283	24.9146	0.000768	24.9146
	0.01104	6.62081	-0.0161	6.62081	-0.02116	6.62081		0.00689	11.1955	-0.00766	11.1955	-0.00843	11.1955		0.00857	8.8058	-0.01386	8.8058	-0.01915	8.8058		0.00686	17.3925	-0.005	17.3925	-0.00315	17.3925			0.00933	16.4521	-0.00916	16.4521	-0.00958	16.4521		0.0068	21.5742	-0.00373	21.5742	-0.000653	21.5742		0.00643	24.9254	-0.00285	24.9254	0.000738	24.9254
	0.01109	6.64956	-0.01613	6.64956	-0.02117	6.64956		0.0069	11.1499	-0.00768	11.1499	-0.00847	11.1499		0.00859	8.81816	-0.01392	8.81816	-0.01924	8.81816		0.00688	17.3662	-0.00503	17.3662	-0.00318	17.3662			0.00936	16.4705	-0.00916	16.4705	-0.00958	16.4705		0.00681	21.6068	-0.00374	21.6068	-0.000662	21.6068		0.00645	24.941	-0.00285	24.941	0.000742	24.941
	0.01107	6.72975	-0.01615	6.72975	-0.02123	6.72975		0.0069	11.1352	-0.0077	11.1352	-0.00851	11.1352		0.00859	8.78539	-0.01397	8.78539	-0.01935	8.78539		0.00688	17.3134	-0.00504	17.3134	-0.00319	17.3134			0.00936	16.4398	-0.00917	16.4398	-0.00958	16.4398		0.00682	21.5837	-0.00375	21.5837	-0.000671	21.5837		0.00646	24.9514	-0.00287	24.9514	0.000722	24.9514
	0.0111	6.70296	-0.01617	6.70296	-0.02124	6.70296		0.0069	11.1916	-0.00773	11.1916	-0.00856	11.1916		0.00862	8.80608	-0.01403	8.80608	-0.01944	8.80608		0.00688	17.2855	-0.00507	17.2855	-0.00327	17.2855			0.00938	16.4132	-0.00917	16.4132	-0.00957	16.4132		0.00683	21.6094	-0.00376	21.6094	-0.000698	21.6094		0.00646	24.9775	-0.00288	24.9775	0.000706	24.9775
	0.0111	6.64871	-0.01619	6.64871	-0.02128	6.64871		0.00693	11.1923	-0.00775	11.1923	-0.00857	11.1923		0.00863	8.80469	-0.01408	8.80469	-0.01954	8.80469		0.00689	17.2766	-0.00509	17.2766	-0.00329	17.2766			0.0094	16.4312	-0.00917	16.4312	-0.00956	16.4312		0.00685	21.6412	-0.00377	21.6412	-0.000697	21.6412		0.00647	25.0476	-0.0029	25.0476	0.00067	25.0476
	0.01115	6.63048	-0.01622	6.63048	-0.02129	6.63048		0.00692	11.158	-0.00778	11.158	-0.00863	11.158		0.00864	8.76168	-0.01414	8.76168	-0.01964	8.76168		0.0069	17.2536	-0.00511	17.2536	-0.00332	17.2536			0.0094	16.3697	-0.00917	16.3697	-0.00956	16.3697		0.00685	21.6424	-0.00378	21.6424	-0.000716	21.6424		0.00647	25.0517	-0.00291	25.0517	0.000655	25.0517
	0.01115	6.68226	-0.01626	6.68226	-0.02137	6.68226		0.00694	11.1671	-0.0078	11.1671	-0.00865	11.1671		0.00864	8.80206	-0.01417	8.80206	-0.01969	8.80206		0.00691	17.1612	-0.00514	17.1612	-0.00336	17.1612			0.00942	16.3731	-0.00917	16.3731	-0.00956	16.3731		0.00686	21.639	-0.0038	21.639	-0.000744	21.639		0.00649	25.1404	-0.00292	25.1404	0.000644	25.1404
	0.01114	6.576	-0.01629	6.576	-0.02144	6.576		0.00694	11.1038	-0.00782	11.1038	-0.0087	11.1038		0.00867	8.77673	-0.01419	8.77673	-0.01972	8.77673		0.00692	17.1138	-0.00515	17.1138	-0.00338	17.1138			0.00941	16.2999	-0.00917	16.2999	-0.00957	16.2999		0.00688	21.6846	-0.00381	21.6846	-0.000743	21.6846		0.00648	25.1835	-0.00295	25.1835	0.000588	25.1835
	0.01118	6.59667	-0.01631	6.59667	-0.02144	6.59667		0.00697	11.097	-0.00784	11.097	-0.00871	11.097		0.00867	8.73645	-0.01425	8.73645	-0.01983	8.73645		0.00692	17.0981	-0.00517	17.0981	-0.00342	17.0981			0.00942	16.3409	-0.00917	16.3409	-0.00956	16.3409		0.00688	21.7003	-0.00382	21.7003	-0.000762	21.7003		0.00651	25.1627	-0.00296	25.1627	0.000587	25.1627
	0.01117	6.65091	-0.01634	6.65091	-0.02151	6.65091		0.00697	11.1405	-0.00787	11.1405	-0.00876	11.1405		0.00867	8.71544	-0.01431	8.71544	-0.01994	8.71544		0.00694	17.0852	-0.0052	17.0852	-0.00345	17.0852			0.00945	16.3124	-0.00917	16.3124	-0.00956	16.3124		0.0069	21.7204	-0.00384	21.7204	-0.000779	21.7204		0.00652	25.1846	-0.00297	25.1846	0.000582	25.1846
	0.01123	6.62808	-0.01637	6.62808	-0.02151	6.62808		0.00696	11.1224	-0.00789	11.1224	-0.00883	11.1224		0.00871	8.73706	-0.01433	8.73706	-0.01996	8.73706		0.00695	17.0511	-0.00522	17.0511	-0.0035	17.0511			0.00948	16.2733	-0.00917	16.2733	-0.00955	16.2733		0.0069	21.7553	-0.00385	21.7553	-0.000798	21.7553		0.00651	25.2575	-0.00298	25.2575	0.000541	25.2575
	0.0112	6.55009	-0.01639	6.55009	-0.02158	6.55009		0.00699	11.0906	-0.00792	11.0906	-0.00885	11.0906		0.00872	8.74885	-0.01436	8.74885	-0.02	8.74885		0.00696	17.0187	-0.00525	17.0187	-0.00354	17.0187			0.00948	16.1978	-0.00918	16.1978	-0.00955	16.1978		0.0069	21.7705	-0.00387	21.7705	-0.000836	21.7705		0.00653	25.3197	-0.00299	25.3197	0.000545	25.3197
	0.01123	6.55537	-0.01641	6.55537	-0.02159	6.55537		0.00698	11.0685	-0.00794	11.0685	-0.00891	11.0685		0.00872	8.71443	-0.01442	8.71443	-0.02011	8.71443		0.00698	16.98	-0.00527	16.98	-0.00355	16.98			0.00948	16.2082	-0.00918	16.2082	-0.00955	16.2082		0.00692	21.823	-0.00388	21.823	-0.000835	21.823		0.00653	25.3873	-0.003	25.3873	0.00053	25.3873
	0.01126	6.58993	-0.01644	6.58993	-0.02162	6.58993		0.00702	11.2041	-0.00796	11.2041	-0.0089	11.2041		0.00874	8.68876	-0.01447	8.68876	-0.0202	8.68876		0.007	16.9538	-0.00528	16.9538	-0.00357	16.9538			0.00951	16.2127	-0.00918	16.2127	-0.00954	16.2127		0.00693	21.8838	-0.0039	21.8838	-0.000862	21.8838		0.00654	25.4245	-0.00302	25.4245	0.000509	25.4245
	0.01128	6.58671	-0.01646	6.58671	-0.02164	6.58671		0.007	11.0831	-0.00798	11.0831	-0.00897	11.0831		0.00873	8.65683	-0.0145	8.65683	-0.02027	8.65683		0.007	16.9156	-0.0053	16.9156	-0.0036	16.9156			0.00952	16.2405	-0.00919	16.2405	-0.00954	16.2405		0.00694	21.9002	-0.00391	21.9002	-0.000871	21.9002		0.00655	25.451	-0.00302	25.451	0.000504	25.451
	0.01128	6.56916	-0.01648	6.56916	-0.02168	6.56916		0.00702	11.1353	-0.00801	11.1353	-0.00899	11.1353		0.00876	8.66144	-0.01456	8.66144	-0.02035	8.66144		0.007	16.8957	-0.00534	16.8957	-0.00368	16.8957			0.00953	16.1805	-0.00919	16.1805	-0.00954	16.1805		0.00694	21.9288	-0.00392	21.9288	-0.000909	21.9288		0.00657	25.5603	-0.00304	25.5603	0.000493	25.5603
	0.0113	6.57693	-0.0165	6.57693	-0.0217	6.57693		0.00704	11.1308	-0.00803	11.1308	-0.00902	11.1308		0.00876	8.6733	-0.01461	8.6733	-0.02046	8.6733		0.00701	16.8591	-0.00536	16.8591	-0.0037	16.8591			0.00955	16.0994	-0.00919	16.0994	-0.00954	16.0994		0.00696	21.885	-0.00393	21.885	-0.000908	21.885		0.00659	25.5462	-0.00305	25.5462	0.000482	25.5462
	0.01133	6.59358	-0.01652	6.59358	-0.02171	6.59358		0.00705	11.07	-0.00805	11.07	-0.00905	11.07		0.00878	8.68317	-0.01467	8.68317	-0.02055	8.68317		0.00703	16.8517	-0.00538	16.8517	-0.00373	16.8517			0.00956	16.0912	-0.00919	16.0912	-0.00953	16.0912		0.00696	21.8873	-0.00394	21.8873	-0.000927	21.8873		0.00658	25.5532	-0.00305	25.5532	0.000472	25.5532
	0.01133	6.54575	-0.01655	6.54575	-0.02177	6.54575		0.00705	11.1043	-0.00808	11.1043	-0.00911	11.1043		0.00879	8.63721	-0.01472	8.63721	-0.02065	8.63721		0.00702	16.8092	-0.0054	16.8092	-0.00378	16.8092			0.00958	16.0444	-0.00919	16.0444	-0.00952	16.0444		0.00696	21.9028	-0.00395	21.9028	-0.000946	21.9028		0.0066	25.538	-0.00307	25.538	0.000462	25.538
	0.01133	6.60777	-0.01657	6.60777	-0.02181	6.60777		0.00706	11.143	-0.0081	11.143	-0.00914	11.143		0.00881	8.66256	-0.01478	8.66256	-0.02075	8.66256		0.00705	16.7994	-0.00543	16.7994	-0.0038	16.7994			0.00958	16.0676	-0.00919	16.0676	-0.00953	16.0676		0.00699	22.0119	-0.00397	22.0119	-0.000953	22.0119		0.00662	25.6306	-0.00308	25.6306	0.000466	25.6306
	0.01134	6.55085	-0.0166	6.55085	-0.02186	6.55085		0.00708	11.1043	-0.00813	11.1043	-0.00918	11.1043		0.00882	8.61758	-0.01483	8.61758	-0.02085	8.61758		0.00705	16.7621	-0.00544	16.7621	-0.00384	16.7621			0.00959	16.0474	-0.00919	16.0474	-0.00952	16.0474		0.007	21.9572	-0.00398	21.9572	-0.000962	21.9572		0.00662	25.6252	-0.00309	25.6252	0.000435	25.6252
	0.01138	6.58086	-0.01663	6.58086	-0.02188	6.58086		0.00708	11.1093	-0.00815	11.1093	-0.00923	11.1093		0.00883	8.61351	-0.01486	8.61351	-0.02089	8.61351		0.00707	16.7017	-0.00546	16.7017	-0.00385	16.7017			0.0096	16.0599	-0.0092	16.0599	-0.00952	16.0599		0.007	22.0442	-0.004	22.0442	-0.001	22.0442		0.00662	25.6309	-0.00311	25.6309	0.000405	25.6309
	0.01139	6.58443	-0.01665	6.58443	-0.02191	6.58443		0.00708	11.1311	-0.00817	11.1311	-0.00927	11.1311		0.00886	8.60764	-0.01492	8.60764	-0.02097	8.60764		0.00705	16.7083	-0.00548	16.7083	-0.0039	16.7083			0.00962	15.9968	-0.0092	15.9968	-0.00952	15.9968		0.00702	22.0556	-0.00401	22.0556	-0.000999	22.0556		0.00662	25.6632	-0.00312	25.6632	0.000389	25.6632
	0.01141	6.52002	-0.01668	6.52002	-0.02195	6.52002		0.00709	11.1821	-0.0082	11.1821	-0.00931	11.1821		0.00884	8.62312	-0.01497	8.62312	-0.0211	8.62312		0.00709	16.6601	-0.0055	16.6601	-0.00392	16.6601			0.00963	16.0012	-0.0092	16.0012	-0.00951	16.0012		0.00703	22.0866	-0.00404	22.0866	-0.00105	22.0866		0.00664	25.6949	-0.00313	25.6949	0.000378	25.6949
	0.01144	6.58501	-0.0167	6.58501	-0.02196	6.58501		0.00711	11.0842	-0.00822	11.0842	-0.00933	11.0842		0.00888	8.62728	-0.01503	8.62728	-0.02118	8.62728		0.00708	16.5974	-0.00552	16.5974	-0.00396	16.5974			0.00964	15.993	-0.0092	15.993	-0.00951	15.993		0.00703	22.0449	-0.00404	22.0449	-0.00105	22.0449		0.00665	25.7727	-0.00315	25.7727	0.000358	25.7727
	0.01142	6.52384	-0.01672	6.52384	-0.02202	6.52384		0.00712	11.0918	-0.00824	11.0918	-0.00937	11.0918		0.00888	8.6059	-0.01508	8.6059	-0.02129	8.6059		0.00711	16.5122	-0.00555	16.5122	-0.00399	16.5122			0.00966	15.9937	-0.0092	15.9937	-0.00951	15.9937		0.00705	22.1054	-0.00406	22.1054	-0.00106	22.1054		0.00667	25.7952	-0.00315	25.7952	0.000362	25.7952
	0.01144	6.58685	-0.01675	6.58685	-0.02206	6.58685		0.00713	11.1199	-0.00827	11.1199	-0.00941	11.1199		0.00888	8.58327	-0.01511	8.58327	-0.02134	8.58327		0.00711	16.4755	-0.00557	16.4755	-0.00402	16.4755			0.00967	15.9332	-0.0092	15.9332	-0.0095	15.9332		0.00705	22.1028	-0.00408	22.1028	-0.0011	22.1028		0.00666	25.7742	-0.00317	25.7742	0.000322	25.7742
	0.01144	6.62828	-0.01677	6.62828	-0.0221	6.62828		0.00715	11.0744	-0.0083	11.0744	-0.00944	11.0744		0.00892	8.5882	-0.01517	8.5882	-0.02141	8.5882		0.00711	16.4277	-0.00559	16.4277	-0.00407	16.4277			0.00969	15.9105	-0.0092	15.9105	-0.00949	15.9105		0.00705	22.1033	-0.00408	22.1033	-0.00112	22.1033		0.00667	25.8306	-0.00318	25.8306	0.000301	25.8306
	0.01147	6.56708	-0.0168	6.56708	-0.02213	6.56708		0.00714	11.1006	-0.00833	11.1006	-0.00951	11.1006		0.00892	8.55319	-0.01522	8.55319	-0.02152	8.55319		0.00712	16.4068	-0.00561	16.4068	-0.0041	16.4068			0.00971	15.9036	-0.0092	15.9036	-0.00948	15.9036		0.00708	22.1245	-0.00409	22.1245	-0.00111	22.1245		0.00669	25.8562	-0.0032	25.8562	0.00029	25.8562
	0.0115	6.53102	-0.01681	6.53102	-0.02212	6.53102		0.00715	11.0435	-0.00835	11.0435	-0.00954	11.0435		0.00893	8.55389	-0.01528	8.55389	-0.02163	8.55389		0.00713	16.3798	-0.00564	16.3798	-0.00414	16.3798			0.00969	15.857	-0.0092	15.857	-0.00949	15.857		0.00709	22.1919	-0.00411	22.1919	-0.00114	22.1919		0.00669	25.8626	-0.00321	25.8626	0.000275	25.8626
	0.01152	6.57888	-0.01684	6.57888	-0.02216	6.57888		0.00715	11.1182	-0.00837	11.1182	-0.00959	11.1182		0.00894	8.50361	-0.01531	8.50361	-0.02167	8.50361		0.00715	16.3556	-0.00565	16.3556	-0.00416	16.3556			0.00975	15.8977	-0.00921	15.8977	-0.00947	15.8977		0.00709	22.2062	-0.00413	22.2062	-0.00117	22.2062		0.00671	25.9151	-0.00322	25.9151	0.000264	25.9151
	0.01155	6.54764	-0.01686	6.54764	-0.02217	6.54764		0.00717	11.0557	-0.0084	11.0557	-0.00963	11.0557		0.00894	8.46526	-0.01536	8.46526	-0.02178	8.46526		0.00715	16.2806	-0.00567	16.2806	-0.00419	16.2806			0.00974	15.8348	-0.0092	15.8348	-0.00946	15.8348		0.00711	22.24	-0.00414	22.24	-0.00117	22.24		0.00672	25.957	-0.00324	25.957	0.000243	25.957
	0.01154	6.641	-0.01689	6.641	-0.02224	6.641		0.00719	11.0286	-0.00842	11.0286	-0.00965	11.0286		0.00897	8.48349	-0.01542	8.48349	-0.02186	8.48349		0.00717	16.2999	-0.00571	16.2999	-0.00424	16.2999			0.00975	15.8269	-0.0092	15.8269	-0.00946	15.8269		0.00711	22.2646	-0.00416	22.2646	-0.00121	22.2646		0.00672	26.031	-0.00325	26.031	0.000212	26.031
	0.01155	6.64338	-0.01691	6.64338	-0.02227	6.64338		0.0072	11.0365	-0.00844	11.0365	-0.00969	11.0365		0.00897	8.51757	-0.01547	8.51757	-0.02197	8.51757		0.00717	16.2502	-0.00571	16.2502	-0.00426	16.2502			0.00977	15.7974	-0.0092	15.7974	-0.00945	15.7974		0.00712	22.2647	-0.00417	22.2647	-0.00122	22.2647		0.00672	26.0543	-0.00326	26.0543	0.000197	26.0543
	0.01157	6.60677	-0.01694	6.60677	-0.02231	6.60677		0.00722	11.1001	-0.00847	11.1001	-0.00972	11.1001		0.00898	8.44852	-0.0155	8.44852	-0.02202	8.44852		0.00719	16.2275	-0.00575	16.2275	-0.00431	16.2275			0.00978	15.7843	-0.0092	15.7843	-0.00944	15.7843		0.00712	22.3027	-0.00418	22.3027	-0.00124	22.3027		0.00674	26.0959	-0.00328	26.0959	0.000171	26.0959
	0.01157	6.58203	-0.01696	6.58203	-0.02235	6.58203		0.00721	11.0166	-0.00849	11.0166	-0.00978	11.0166		0.00899	8.47052	-0.01558	8.47052	-0.02218	8.47052		0.00719	16.2044	-0.00577	16.2044	-0.00435	16.2044			0.0098	15.7187	-0.0092	15.7187	-0.00944	15.7187		0.00713	22.2783	-0.0042	22.2783	-0.00127	22.2783		0.00673	26.1436	-0.0033	26.1436	0.00013	26.1436
	0.0116	6.63108	-0.01699	6.63108	-0.02238	6.63108		0.00722	11.0515	-0.00852	11.0515	-0.00981	11.0515		0.00902	8.46302	-0.01564	8.46302	-0.02226	8.46302		0.0072	16.2091	-0.0058	16.2091	-0.00439	16.2091			0.00978	15.6642	-0.0092	15.6642	-0.00944	15.6642		0.00715	22.3242	-0.00421	22.3242	-0.00127	22.3242		0.00676	26.1243	-0.00331	26.1243	0.000145	26.1243
	0.01163	6.50284	-0.01701	6.50284	-0.02239	6.50284		0.00723	11.084	-0.00853	11.084	-0.00983	11.084		0.00902	8.45606	-0.01567	8.45606	-0.02231	8.45606		0.00721	16.1517	-0.00581	16.1517	-0.00441	16.1517			0.00981	15.5907	-0.0092	15.5907	-0.00943	15.5907		0.00715	22.3256	-0.00423	22.3256	-0.0013	22.3256		0.00678	26.1746	-0.00333	26.1746	0.000118	26.1746
	0.01163	6.55745	-0.01703	6.55745	-0.02243	6.55745		0.00723	11.0705	-0.00855	11.0705	-0.00987	11.0705		0.00904	8.45417	-0.01572	8.45417	-0.0224	8.45417		0.00722	16.1165	-0.00584	16.1165	-0.00446	16.1165			0.00984	15.6296	-0.0092	15.6296	-0.00942	15.6296		0.00717	22.3828	-0.00424	22.3828	-0.0013	22.3828		0.00678	26.2052	-0.00335	26.2052	8.77e-05	26.2052
	0.01162	6.59466	-0.01705	6.59466	-0.02248	6.59466		0.00725	11.0813	-0.00858	11.0813	-0.0099	11.0813		0.00904	8.40805	-0.01578	8.40805	-0.02252	8.40805		0.00723	16.1149	-0.00587	16.1149	-0.0045	16.1149			0.00985	15.645	-0.0092	15.645	-0.00942	15.645		0.00718	22.4132	-0.00425	22.4132	-0.00133	22.4132		0.00678	26.2257	-0.00336	26.2257	5.69e-05	26.2257
	0.01168	6.56082	-0.01708	6.56082	-0.02248	6.56082		0.00727	11.1091	-0.0086	11.1091	-0.00993	11.1091		0.00907	8.40818	-0.01581	8.40818	-0.02254	8.40818		0.00724	16.0981	-0.00587	16.0981	-0.00451	16.0981			0.00985	15.5536	-0.0092	15.5536	-0.00942	15.5536		0.00719	22.4619	-0.00427	22.4619	-0.00136	22.4619		0.00679	26.2647	-0.00337	26.2647	5.15e-05	26.2647
	0.0117	6.53111	-0.0171	6.53111	-0.0225	6.53111		0.00727	11.016	-0.00862	11.016	-0.00997	11.016		0.00904	8.40083	-0.01586	8.40083	-0.02268	8.40083		0.00726	16.0863	-0.0059	16.0863	-0.00454	16.0863			0.00988	15.6121	-0.0092	15.6121	-0.00941	15.6121		0.00719	22.4417	-0.00428	22.4417	-0.00138	22.4417		0.00679	26.3246	-0.00338	26.3246	2.08e-05	26.3246
	0.01168	6.55437	-0.01711	6.55437	-0.02254	6.55437		0.00726	11.0244	-0.00865	11.0244	-0.01004	11.0244		0.00909	8.40277	-0.01592	8.40277	-0.02274	8.40277		0.00726	16.055	-0.00592	16.055	-0.00457	16.055			0.00991	15.5519	-0.0092	15.5519	-0.0094	15.5519		0.0072	22.4576	-0.0043	22.4576	-0.0014	22.4576		0.00682	26.3572	-0.00339	26.3572	3.54e-05	26.3572
	0.01171	6.59059	-0.01714	6.59059	-0.02257	6.59059		0.0073	11.0384	-0.00867	11.0384	-0.01004	11.0384		0.00909	8.41528	-0.01597	8.41528	-0.02285	8.41528		0.00728	16.0878	-0.00593	16.0878	-0.00459	16.0878			0.00991	15.5232	-0.0092	15.5232	-0.00939	15.5232		0.0072	22.5254	-0.00432	22.5254	-0.00144	22.5254		0.00681	26.4252	-0.00341	26.4252	-5.38e-06	26.4252
	0.01174	6.62817	-0.01716	6.62817	-0.02258	6.62817		0.00731	10.9889	-0.00869	10.9889	-0.01008	10.9889		0.00912	8.42425	-0.01603	8.42425	-0.02294	8.42425		0.00728	16.0506	-0.00596	16.0506	-0.00464	16.0506			0.00992	15.5385	-0.0092	15.5385	-0.00939	15.5385		0.00722	22.5594	-0.00434	22.5594	-0.00146	22.5594		0.00682	26.4229	-0.00342	26.4229	-1.08e-05	26.4229
	0.01176	6.64211	-0.01718	6.64211	-0.0226	6.64211		0.0073	11.044	-0.00872	11.044	-0.01014	11.044		0.00912	8.38905	-0.01608	8.38905	-0.02305	8.38905		0.00729	16.0433	-0.00599	16.0433	-0.00469	16.0433			0.00991	15.551	-0.0092	15.551	-0.00939	15.551		0.00723	22.5624	-0.00435	22.5624	-0.00147	22.5624		0.00683	26.4782	-0.00343	26.4782	-3.15e-05	26.4782
	0.01176	6.60063	-0.0172	6.60063	-0.02264	6.60063		0.00732	11.056	-0.00874	11.056	-0.01016	11.056		0.00915	8.3742	-0.01611	8.3742	-0.02307	8.3742		0.00729	16.0465	-0.00601	16.0465	-0.00472	16.0465			0.00997	15.5285	-0.00921	15.5285	-0.00937	15.5285		0.00725	22.573	-0.00437	22.573	-0.00149	22.573		0.00685	26.5426	-0.00344	26.5426	-2.69e-05	26.5426
	0.01178	6.62789	-0.01721	6.62789	-0.02264	6.62789		0.00734	11.0059	-0.00876	11.0059	-0.01018	11.0059		0.00914	8.36901	-0.01617	8.36901	-0.02319	8.36901		0.0073	15.9957	-0.00602	15.9957	-0.00474	15.9957			0.00993	15.4822	-0.0092	15.4822	-0.00938	15.4822		0.00724	22.6261	-0.00438	22.6261	-0.00151	22.6261		0.00686	26.5304	-0.00345	26.5304	-3.23e-05	26.5304
	0.01179	6.69799	-0.01724	6.69799	-0.02269	6.69799		0.00735	11.0451	-0.00879	11.0451	-0.01022	11.0451		0.00915	8.39155	-0.01622	8.39155	-0.02329	8.39155		0.00732	15.9911	-0.00605	15.9911	-0.00478	15.9911			0.00997	15.4366	-0.00921	15.4366	-0.00938	15.4366		0.00726	22.5691	-0.00439	22.5691	-0.00151	22.5691		0.00687	26.5579	-0.00345	26.5579	-3.77e-05	26.5579
	0.01182	6.67038	-0.01726	6.67038	-0.0227	6.67038		0.00735	11.0457	-0.00881	11.0457	-0.01026	11.0457		0.00918	8.36402	-0.01628	8.36402	-0.02338	8.36402		0.00732	15.9685	-0.00608	15.9685	-0.00483	15.9685			0.00997	15.4092	-0.00921	15.4092	-0.00937	15.4092		0.00728	22.6492	-0.00441	22.6492	-0.00153	22.6492		0.00688	26.6165	-0.00347	26.6165	-5.85e-05	26.6165
	0.01182	6.62737	-0.01728	6.62737	-0.02274	6.62737		0.00736	11.0305	-0.00883	11.0305	-0.01029	11.0305		0.00918	8.3687	-0.01631	8.3687	-0.02343	8.3687		0.00733	15.9429	-0.0061	15.9429	-0.00488	15.9429			0.00999	15.3494	-0.0092	15.3494	-0.00936	15.3494		0.00728	22.7143	-0.00442	22.7143	-0.00157	22.7143		0.00689	26.5567	-0.00348	26.5567	-7.92e-05	26.5567
	0.01186	6.674	-0.0173	6.674	-0.02274	6.674		0.00737	10.9514	-0.00885	10.9514	-0.01033	10.9514		0.00919	8.38752	-0.01633	8.38752	-0.02348	8.38752		0.00735	15.9237	-0.00613	15.9237	-0.00491	15.9237			0.01	15.3742	-0.0092	15.3742	-0.00936	15.3742		0.00729	22.7086	-0.00443	22.7086	-0.00158	22.7086		0.00689	26.6275	-0.0035	26.6275	-0.00011	26.6275
	0.01186	6.58978	-0.01732	6.58978	-0.02278	6.58978		0.00739	10.9842	-0.00888	10.9842	-0.01037	10.9842		0.0092	8.35008	-0.01639	8.35008	-0.02358	8.35008		0.00736	15.9165	-0.00615	15.9165	-0.00493	15.9165			0.01002	15.2964	-0.0092	15.2964	-0.00935	15.2964		0.00731	22.7579	-0.00445	22.7579	-0.0016	22.7579		0.0069	26.6482	-0.00352	26.6482	-0.000131	26.6482
	0.01187	6.62507	-0.01733	6.62507	-0.02279	6.62507		0.00739	11.0157	-0.0089	11.0157	-0.01042	11.0157		0.00922	8.35115	-0.01644	8.35115	-0.02367	8.35115		0.00737	15.879	-0.00618	15.879	-0.005	15.879			0.01002	15.3257	-0.0092	15.3257	-0.00935	15.3257		0.00732	22.7449	-0.00446	22.7449	-0.0016	22.7449		0.0069	26.6614	-0.00354	26.6614	-0.000177	26.6614
	0.01189	6.66756	-0.01735	6.66756	-0.02281	6.66756		0.00741	11.0253	-0.00893	11.0253	-0.01045	11.0253		0.00923	8.28743	-0.0165	8.28743	-0.02377	8.28743		0.00737	15.8901	-0.0062	15.8901	-0.00503	15.8901			0.01004	15.2516	-0.0092	15.2516	-0.00934	15.2516		0.00732	22.7655	-0.00448	22.7655	-0.00164	22.7655		0.00694	26.7308	-0.00355	26.7308	-0.000168	26.7308
	0.0119	6.66885	-0.01737	6.66885	-0.02284	6.66885		0.00741	10.9753	-0.00895	10.9753	-0.0105	10.9753		0.00923	8.29494	-0.01656	8.29494	-0.02388	8.29494		0.00739	15.852	-0.00623	15.852	-0.00507	15.852			0.01006	15.2348	-0.0092	15.2348	-0.00933	15.2348		0.00734	22.7881	-0.00449	22.7881	-0.00164	22.7881		0.00693	26.781	-0.00357	26.781	-0.000208	26.781
	0.01189	6.68645	-0.01738	6.68645	-0.02287	6.68645		0.00742	11.0025	-0.00897	11.0025	-0.01052	11.0025		0.00923	8.30534	-0.01658	8.30534	-0.02394	8.30534		0.0074	15.8311	-0.00625	15.8311	-0.00509	15.8311			0.01008	15.2168	-0.0092	15.2168	-0.00932	15.2168		0.00734	22.7848	-0.0045	22.7848	-0.00166	22.7848		0.00694	26.7645	-0.00358	26.7645	-0.000229	26.7645
	0.01195	6.68677	-0.0174	6.68677	-0.02285	6.68677		0.00743	10.9032	-0.00899	10.9032	-0.01055	10.9032		0.00925	8.2378	-0.01664	8.2378	-0.02403	8.2378		0.00741	15.8412	-0.00626	15.8412	-0.00511	15.8412			0.01008	15.197	-0.0092	15.197	-0.00932	15.197		0.00735	22.8106	-0.00452	22.8106	-0.00169	22.8106		0.00696	26.8518	-0.0036	26.8518	-0.00024	26.8518
	0.01194	6.68428	-0.01743	6.68428	-0.02292	6.68428		0.00744	10.9792	-0.00902	10.9792	-0.01059	10.9792		0.00927	8.25977	-0.01667	8.25977	-0.02406	8.25977		0.00741	15.8469	-0.00629	15.8469	-0.00517	15.8469			0.01011	15.1511	-0.0092	15.1511	-0.00931	15.1511		0.00735	22.8333	-0.00453	22.8333	-0.00171	22.8333		0.00697	26.8642	-0.00361	26.8642	-0.000245	26.8642
	0.01194	6.68987	-0.01745	6.68987	-0.02296	6.68987		0.00743	10.9541	-0.00904	10.9541	-0.01065	10.9541		0.00929	8.24992	-0.01672	8.24992	-0.02415	8.24992		0.00742	15.8131	-0.00632	15.8131	-0.00521	15.8131			0.0101	15.1479	-0.0092	15.1479	-0.00931	15.1479		0.00736	22.8153	-0.00455	22.8153	-0.00173	22.8153		0.00697	26.9065	-0.00362	26.9065	-0.000276	26.9065
	0.012	6.68912	-0.01747	6.68912	-0.02294	6.68912		0.00747	10.9608	-0.00906	10.9608	-0.01065	10.9608		0.0093	8.23029	-0.01678	8.23029	-0.02426	8.23029		0.00743	15.8011	-0.00633	15.8011	-0.00524	15.8011			0.0101	15.0975	-0.0092	15.0975	-0.00932	15.0975		0.00737	22.8561	-0.00457	22.8561	-0.00176	22.8561		0.00699	26.9407	-0.00363	26.9407	-0.000272	26.9407
	0.012	6.74842	-0.01749	6.74842	-0.02298	6.74842		0.00746	10.8855	-0.00909	10.8855	-0.01071	10.8855		0.00933	8.24013	-0.01683	8.24013	-0.02434	8.24013		0.00744	15.8174	-0.00636	15.8174	-0.00528	15.8174			0.01011	15.0953	-0.0092	15.0953	-0.00931	15.0953		0.00739	22.8552	-0.00458	22.8552	-0.00176	22.8552		0.00697	26.9146	-0.00365	26.9146	-0.000322	26.9146
	0.01203	6.7738	-0.01752	6.7738	-0.02301	6.7738		0.00746	10.8556	-0.00911	10.8556	-0.01075	10.8556		0.0093	8.20561	-0.01686	8.20561	-0.02442	8.20561		0.00745	15.7892	-0.00639	15.7892	-0.00532	15.7892			0.01017	15.0889	-0.0092	15.0889	-0.00929	15.0889		0.00739	22.8929	-0.00459	22.8929	-0.0018	22.8929		0.00699	26.9784	-0.00366	26.9784	-0.000333	26.9784
	0.01203	6.74397	-0.01753	6.74397	-0.02303	6.74397		0.0075	10.8871	-0.00913	10.8871	-0.01077	10.8871		0.00934	8.20198	-0.01692	8.20198	-0.02449	8.20198		0.00746	15.7878	-0.00641	15.7878	-0.00537	15.7878			0.01015	15.0569	-0.0092	15.0569	-0.00929	15.0569		0.00741	22.9314	-0.0046	22.9314	-0.0018	22.9314		0.00701	27.0106	-0.00368	27.0106	-0.000344	27.0106
	0.01205	6.72589	-0.01755	6.72589	-0.02305	6.72589		0.0075	10.9095	-0.00916	10.9095	-0.01082	10.9095		0.00935	8.18589	-0.01697	8.18589	-0.02459	8.18589		0.00748	15.7891	-0.00643	15.7891	-0.00538	15.7891			0.01018	15.0604	-0.0092	15.0604	-0.00928	15.0604		0.00742	22.9211	-0.00462	22.9211	-0.00183	22.9211		0.00701	27.0572	-0.00369	27.0572	-0.000375	27.0572
	0.01206	6.77064	-0.01757	6.77064	-0.02308	6.77064		0.00752	10.8621	-0.00918	10.8621	-0.01084	10.8621		0.00936	8.20259	-0.01703	8.20259	-0.0247	8.20259		0.00749	15.7761	-0.00646	15.7761	-0.00543	15.7761			0.01019	14.9925	-0.0092	14.9925	-0.00928	14.9925		0.00743	22.9391	-0.00463	22.9391	-0.00183	22.9391		0.00702	27.0733	-0.0037	27.0733	-0.00038	27.0733
	0.01206	6.74132	-0.01759	6.74132	-0.02312	6.74132		0.00752	10.9058	-0.0092	10.9058	-0.01088	10.9058		0.00939	8.17279	-0.01708	8.17279	-0.02478	8.17279		0.00749	15.7655	-0.00649	15.7655	-0.00548	15.7655			0.01021	14.9488	-0.0092	14.9488	-0.00926	14.9488		0.00743	22.9854	-0.00465	22.9854	-0.00187	22.9854		0.00703	27.088	-0.00372	27.088	-0.000416	27.088
	0.0121	6.73294	-0.01761	6.73294	-0.02312	6.73294		0.00753	10.8615	-0.00922	10.8615	-0.01091	10.8615		0.00939	8.13305	-0.01711	8.13305	-0.02483	8.13305		0.0075	15.7198	-0.0065	15.7198	-0.0055	15.7198			0.01019	14.9144	-0.0092	14.9144	-0.00928	14.9144		0.00745	23.0038	-0.00467	23.0038	-0.00189	23.0038		0.00704	27.1829	-0.00374	27.1829	-0.000437	27.1829
	0.0121	6.75858	-0.01763	6.75858	-0.02316	6.75858		0.00754	10.888	-0.00924	10.888	-0.01094	10.888		0.0094	8.11844	-0.01717	8.11844	-0.02493	8.11844		0.00752	15.7164	-0.00652	15.7164	-0.00552	15.7164			0.01024	14.945	-0.00921	14.945	-0.00926	14.945		0.00745	23.0048	-0.00469	23.0048	-0.00193	23.0048		0.00703	27.1395	-0.00375	27.1395	-0.000462	27.1395
	0.01211	6.73025	-0.01766	6.73025	-0.02321	6.73025		0.00754	10.881	-0.00927	10.881	-0.01099	10.881		0.00941	8.14914	-0.01719	8.14914	-0.02498	8.14914		0.00752	15.7158	-0.00655	15.7158	-0.00557	15.7158			0.01025	14.8868	-0.00921	14.8868	-0.00925	14.8868		0.00747	23.0535	-0.0047	23.0535	-0.00193	23.0535		0.00707	27.2058	-0.00375	27.2058	-0.000438	27.2058
	0.01213	6.75118	-0.01768	6.75118	-0.02323	6.75118		0.00756	10.8497	-0.00929	10.8497	-0.01101	10.8497		0.00941	8.11023	-0.01725	8.11023	-0.02509	8.11023		0.00753	15.7237	-0.00657	15.7237	-0.00562	15.7237			0.01024	14.9219	-0.00921	14.9219	-0.00926	14.9219		0.00747	22.9506	-0.00472	22.9506	-0.00196	22.9506		0.00707	27.2407	-0.00377	27.2407	-0.000468	27.2407
	0.01218	6.72591	-0.01769	6.72591	-0.0232	6.72591		0.00756	10.8321	-0.00931	10.8321	-0.01106	10.8321		0.00944	8.11181	-0.01731	8.11181	-0.02517	8.11181		0.00754	15.7032	-0.00659	15.7032	-0.00564	15.7032			0.01025	14.8397	-0.00921	14.8397	-0.00925	14.8397		0.00749	23.0125	-0.00474	23.0125	-0.00198	23.0125		0.00708	27.249	-0.00378	27.249	-0.000474	27.249
	0.01214	6.82144	-0.01771	6.82144	-0.02328	6.82144		0.00757	10.8236	-0.00933	10.8236	-0.01109	10.8236		0.00946	8.1017	-0.01733	8.1017	-0.02521	8.1017		0.00755	15.7199	-0.00662	15.7199	-0.00568	15.7199			0.01029	14.8603	-0.00921	14.8603	-0.00924	14.8603		0.00749	23.0383	-0.00475	23.0383	-0.002	23.0383		0.00707	27.3138	-0.00379	27.3138	-0.000515	27.3138
	0.01219	6.7384	-0.01773	6.7384	-0.02327	6.7384		0.00758	10.8213	-0.00936	10.8213	-0.01113	10.8213		0.00944	8.08678	-0.01739	8.08678	-0.02534	8.08678		0.00756	15.709	-0.00664	15.709	-0.00573	15.709			0.01029	14.8666	-0.00921	14.8666	-0.00924	14.8666		0.0075	23.0643	-0.00476	23.0643	-0.00203	23.0643		0.0071	27.3039	-0.0038	27.3039	-0.0005	27.3039
	0.01218	6.75222	-0.01776	6.75222	-0.02334	6.75222		0.00761	10.8506	-0.00938	10.8506	-0.01116	10.8506		0.00946	8.0905	-0.01744	8.0905	-0.02543	8.0905		0.00757	15.6609	-0.00665	15.6609	-0.00573	15.6609			0.0103	14.8291	-0.00921	14.8291	-0.00924	14.8291		0.00751	23.0524	-0.00477	23.0524	-0.00204	23.0524		0.0071	27.3136	-0.00382	27.3136	-0.000531	27.3136
	0.01221	6.78499	-0.01777	6.78499	-0.02333	6.78499		0.00759	10.7899	-0.0094	10.7899	-0.01122	10.7899		0.00949	8.04862	-0.01747	8.04862	-0.02545	8.04862		0.00759	15.6321	-0.00668	15.6321	-0.00577	15.6321			0.0103	14.7899	-0.00921	14.7899	-0.00924	14.7899		0.00752	23.0866	-0.00479	23.0866	-0.00206	23.0866		0.00711	27.39	-0.00383	27.39	-0.000552	27.39
	0.01222	6.71041	-0.01779	6.71041	-0.02336	6.71041		0.00762	10.8412	-0.00942	10.8412	-0.01123	10.8412		0.00949	8.02565	-0.0175	8.02565	-0.02551	8.02565		0.00759	15.6406	-0.0067	15.6406	-0.0058	15.6406			0.01035	14.7803	-0.00921	14.7803	-0.00922	14.7803		0.00752	23.112	-0.00481	23.112	-0.0021	23.112		0.00712	27.405	-0.00384	27.405	-0.000557	27.405
	0.01224	6.74406	-0.01781	6.74406	-0.02338	6.74406		0.00761	10.8223	-0.00945	10.8223	-0.01129	10.8223		0.00951	8.04179	-0.01756	8.04179	-0.0256	8.04179		0.00758	15.6286	-0.00672	15.6286	-0.00586	15.6286			0.01033	14.726	-0.00921	14.726	-0.00922	14.726		0.00754	23.1276	-0.00483	23.1276	-0.00212	23.1276		0.00713	27.4645	-0.00385	27.4645	-0.000562	27.4645
	0.01229	6.76968	-0.01783	6.76968	-0.02337	6.76968		0.00763	10.7993	-0.00947	10.7993	-0.01131	10.7993		0.00951	8.02069	-0.01761	8.02069	-0.02571	8.02069		0.00762	15.647	-0.00675	15.647	-0.00588	15.647			0.01032	14.7347	-0.00921	14.7347	-0.00923	14.7347		0.00754	23.1214	-0.00484	23.1214	-0.00214	23.1214		0.00713	27.5012	-0.00387	27.5012	-0.000608	27.5012
	0.01227	6.75945	-0.01785	6.75945	-0.02343	6.75945		0.00764	10.749	-0.0095	10.749	-0.01136	10.749		0.00954	7.98117	-0.01764	7.98117	-0.02574	7.98117		0.00762	15.5959	-0.00677	15.5959	-0.00591	15.5959			0.01037	14.6892	-0.00921	14.6892	-0.00921	14.6892		0.00756	23.1482	-0.00486	23.1482	-0.00216	23.1482		0.00714	27.5383	-0.00388	27.5383	-0.000614	27.5383
	0.0123	6.7789	-0.01787	6.7789	-0.02344	6.7789		0.00765	10.8358	-0.00952	10.8358	-0.01139	10.8358		0.00955	7.99369	-0.01769	7.99369	-0.02584	7.99369		0.00764	15.6292	-0.00679	15.6292	-0.00595	15.6292			0.01037	14.6316	-0.00921	14.6316	-0.00921	14.6316		0.00757	23.1635	-0.00488	23.1635	-0.00218	23.1635		0.00715	27.612	-0.00389	27.612	-0.000635	27.612
	0.0123	6.72037	-0.01789	6.72037	-0.02348	6.72037		0.00768	10.8172	-0.00955	10.8172	-0.01141	10.8172		0.00956	7.98548	-0.01775	7.98548	-0.02594	7.98548		0.00763	15.6201	-0.00681	15.6201	-0.00599	15.6201			0.0104	14.6367	-0.00921	14.6367	-0.0092	14.6367		0.00758	23.1843	-0.00489	23.1843	-0.00219	23.1843		0.00716	27.6348	-0.0039	27.6348	-0.00064	27.6348
	0.01229	6.76262	-0.01791	6.76262	-0.02353	6.76262		0.00767	10.8199	-0.00957	10.8199	-0.01147	10.8199		0.00956	7.97488	-0.01775	7.97488	-0.02594	7.97488		0.00766	15.5685	-0.00684	15.5685	-0.00601	15.5685			0.01043	14.593	-0.00921	14.593	-0.00919	14.593		0.00758	23.2198	-0.00491	23.2198	-0.00223	23.2198		0.00718	27.6578	-0.00392	27.6578	-0.000651	27.6578
	0.01234	6.80397	-0.01793	6.80397	-0.02352	6.80397		0.00769	10.7909	-0.0096	10.7909	-0.0115	10.7909		0.00955	7.94811	-0.01781	7.94811	-0.02606	7.94811		0.00766	15.5955	-0.00685	15.5955	-0.00605	15.5955			0.01041	14.5686	-0.00921	14.5686	-0.0092	14.5686		0.0076	23.2015	-0.00492	23.2015	-0.00225	23.2015		0.00719	27.7041	-0.00393	27.7041	-0.000672	27.7041
	0.01235	6.79429	-0.01794	6.79429	-0.02353	6.79429		0.00769	10.8602	-0.00962	10.8602	-0.01154	10.8602		0.00958	7.96657	-0.01786	7.96657	-0.02614	7.96657		0.00767	15.6052	-0.00688	15.6052	-0.00609	15.6052			0.01044	14.5738	-0.00921	14.5738	-0.00919	14.5738		0.00761	23.2301	-0.00493	23.2301	-0.00226	23.2301		0.00719	27.722	-0.00395	27.722	-0.000702	27.722
	0.01238	6.87733	-0.01796	6.87733	-0.02354	6.87733		0.00768	10.8359	-0.00964	10.8359	-0.01161	10.8359		0.0096	7.9316	-0.01792	7.9316	-0.02623	7.9316		0.00767	15.601	-0.00691	15.601	-0.00615	15.601			0.01044	14.5321	-0.00921	14.5321	-0.00919	14.5321		0.00761	23.2289	-0.00495	23.2289	-0.0023	23.2289		0.00719	27.7324	-0.00396	27.7324	-0.000733	27.7324
	0.01235	6.78848	-0.01799	6.78848	-0.02363	6.78848		0.00771	10.7795	-0.00967	10.7795	-0.01164	10.7795		0.00961	7.93183	-0.01794	7.93183	-0.02628	7.93183		0.00769	15.5579	-0.00694	15.5579	-0.00618	15.5579			0.01047	14.4916	-0.00921	14.4916	-0.00918	14.4916		0.00763	23.2727	-0.00497	23.2727	-0.00231	23.2727		0.00721	27.762	-0.00398	27.762	-0.000744	27.762
	0.0124	6.80007	-0.01801	6.80007	-0.02362	6.80007		0.00772	10.7779	-0.00969	10.7779	-0.01167	10.7779		0.00963	7.88282	-0.018	7.88282	-0.02637	7.88282		0.00769	15.6048	-0.00696	15.6048	-0.00623	15.6048			0.01048	14.465	-0.00921	14.465	-0.00917	14.465		0.00763	23.2855	-0.00498	23.2855	-0.00233	23.2855		0.00723	27.8268	-0.00399	27.8268	-0.000755	27.8268
	0.01242	6.82395	-0.01803	6.82395	-0.02364	6.82395		0.00774	10.7906	-0.00972	10.7906	-0.0117	10.7906		0.00965	7.87097	-0.01806	7.87097	-0.02646	7.87097		0.0077	15.5909	-0.00697	15.5909	-0.00624	15.5909			0.01047	14.3872	-0.00921	14.3872	-0.00918	14.3872		0.00764	23.3229	-0.005	23.3229	-0.00236	23.3229		0.00723	27.7999	-0.00401	27.7999	-0.000785	27.7999
	0.01243	6.8032	-0.01806	6.8032	-0.02369	6.8032		0.00772	10.7539	-0.00974	10.7539	-0.01177	10.7539		0.00965	7.85637	-0.01811	7.85637	-0.02657	7.85637		0.00773	15.5935	-0.00701	15.5935	-0.00628	15.5935			0.01052	14.4063	-0.00921	14.4063	-0.00916	14.4063		0.00766	23.284	-0.00502	23.284	-0.00238	23.284		0.00723	27.8707	-0.00402	27.8707	-0.000801	27.8707
	0.01246	6.85408	-0.01807	6.85408	-0.02368	6.85408		0.00775	10.7135	-0.00977	10.7135	-0.01179	10.7135		0.00965	7.85515	-0.01817	7.85515	-0.02668	7.85515		0.00773	15.54	-0.00702	15.54	-0.00632	15.54			0.01051	14.4348	-0.00921	14.4348	-0.00916	14.4348		0.00766	23.3217	-0.00504	23.3217	-0.00242	23.3217		0.00725	27.8789	-0.00402	27.8789	-0.000796	27.8789
	0.01246	6.8299	-0.0181	6.8299	-0.02374	6.8299		0.00776	10.7141	-0.0098	10.7141	-0.01183	10.7141		0.00968	7.83544	-0.01819	7.83544	-0.02671	7.83544		0.00773	15.5521	-0.00705	15.5521	-0.00637	15.5521			0.01052	14.3828	-0.00922	14.3828	-0.00916	14.3828		0.00769	23.3145	-0.00504	23.3145	-0.00239	23.3145		0.00725	27.9125	-0.00404	27.9125	-0.000827	27.9125
	0.01248	6.87445	-0.01812	6.87445	-0.02376	6.87445		0.00777	10.7576	-0.00982	10.7576	-0.01186	10.7576		0.0097	7.83652	-0.01825	7.83652	-0.0268	7.83652		0.00775	15.5589	-0.00707	15.5589	-0.00638	15.5589			0.01055	14.3565	-0.00922	14.3565	-0.00915	14.3565		0.00769	23.3103	-0.00506	23.3103	-0.00242	23.3103		0.00727	27.9386	-0.00405	27.9386	-0.000838	27.9386
	0.0125	6.83533	-0.01814	6.83533	-0.02378	6.83533		0.00779	10.7307	-0.00984	10.7307	-0.01189	10.7307		0.0097	7.84451	-0.01828	7.84451	-0.02686	7.84451		0.00776	15.5108	-0.00709	15.5108	-0.00643	15.5108			0.01057	14.3362	-0.00922	14.3362	-0.00915	14.3362		0.00771	23.3366	-0.00508	23.3366	-0.00244	23.3366		0.00727	27.9663	-0.00407	27.9663	-0.000868	27.9663
	0.01251	6.79038	-0.01817	6.79038	-0.02383	6.79038		0.00779	10.6832	-0.00987	10.6832	-0.01194	10.6832		0.00971	7.80578	-0.01833	7.80578	-0.02696	7.80578		0.00775	15.4945	-0.00712	15.4945	-0.00649	15.4945			0.01057	14.2717	-0.00922	14.2717	-0.00915	14.2717		0.0077	23.3607	-0.00508	23.3607	-0.00247	23.3607		0.00729	28.0153	-0.00408	28.0153	-0.000879	28.0153
	0.0125	6.82373	-0.01818	6.82373	-0.02386	6.82373		0.0078	10.7171	-0.00989	10.7171	-0.01199	10.7171		0.00972	7.77003	-0.01839	7.77003	-0.02706	7.77003		0.00777	15.5089	-0.00714	15.5089	-0.00651	15.5089			0.01059	14.2454	-0.00922	14.2454	-0.00913	14.2454		0.00771	23.3549	-0.0051	23.3549	-0.0025	23.3549		0.00728	28.0652	-0.00411	28.0652	-0.000935	28.0652
	0.01253	6.85753	-0.01821	6.85753	-0.02389	6.85753		0.00781	10.7215	-0.00991	10.7215	-0.01202	10.7215		0.00974	7.75012	-0.01842	7.75012	-0.02709	7.75012		0.00779	15.4924	-0.00717	15.4924	-0.00654	15.4924			0.01061	14.2136	-0.00921	14.2136	-0.00912	14.2136		0.00772	23.4485	-0.00512	23.4485	-0.00253	23.4485		0.0073	28.0482	-0.00412	28.0482	-0.000946	28.0482
	0.01253	6.79758	-0.01823	6.79758	-0.02393	6.79758		0.00782	10.747	-0.00994	10.747	-0.01206	10.747		0.00975	7.74512	-0.01847	7.74512	-0.02719	7.74512		0.00779	15.4942	-0.00718	15.4942	-0.00657	15.4942			0.01061	14.1145	-0.00921	14.1145	-0.00912	14.1145		0.00773	23.4317	-0.00514	23.4317	-0.00255	23.4317		0.00732	28.0767	-0.00414	28.0767	-0.000957	28.0767
	0.01259	6.82698	-0.01825	6.82698	-0.02391	6.82698		0.00781	10.6801	-0.00996	10.6801	-0.01211	10.6801		0.00977	7.71512	-0.0185	7.71512	-0.02723	7.71512		0.0078	15.4924	-0.00721	15.4924	-0.00662	15.4924			0.01061	14.0937	-0.00921	14.0937	-0.00912	14.0937		0.00775	23.4605	-0.00516	23.4605	-0.00257	23.4605		0.00732	28.1023	-0.00415	28.1023	-0.000988	28.1023
	0.01258	6.81599	-0.01827	6.81599	-0.02396	6.81599		0.00783	10.6612	-0.00998	10.6612	-0.01214	10.6612		0.00977	7.69113	-0.01856	7.69113	-0.02734	7.69113		0.00781	15.4492	-0.00723	15.4492	-0.00664	15.4492			0.01062	14.0553	-0.00922	14.0553	-0.00912	14.0553		0.00775	23.4373	-0.00517	23.4373	-0.00259	23.4373		0.00733	28.1456	-0.00417	28.1456	-0.00101	28.1456
	0.01261	6.85854	-0.01829	6.85854	-0.02397	6.85854		0.00783	10.6385	-0.01001	10.6385	-0.01219	10.6385		0.00979	7.71611	-0.01858	7.71611	-0.02738	7.71611		0.00783	15.4748	-0.00725	15.4748	-0.00668	15.4748			0.01066	14.0328	-0.00922	14.0328	-0.0091	14.0328		0.00776	23.4477	-0.00518	23.4477	-0.0026	23.4477		0.00734	28.1182	-0.00419	28.1182	-0.00104	28.1182
	0.01259	6.78698	-0.01831	6.78698	-0.02403	6.78698		0.00787	10.6945	-0.01004	10.6945	-0.0122	10.6945		0.00979	7.76139	-0.01864	7.76139	-0.02749	7.76139		0.00784	15.4556	-0.00727	15.4556	-0.0067	15.4556			0.01063	13.9907	-0.00922	13.9907	-0.00911	13.9907		0.00778	23.5237	-0.0052	23.5237	-0.00262	23.5237		0.00734	28.2136	-0.0042	28.2136	-0.00106	28.2136
	0.01262	6.83826	-0.01833	6.83826	-0.02404	6.83826		0.00786	10.682	-0.01006	10.682	-0.01226	10.682		0.00981	7.75147	-0.01869	7.75147	-0.02758	7.75147		0.00784	15.4256	-0.0073	15.4256	-0.00675	15.4256			0.01068	13.992	-0.00922	13.992	-0.0091	13.992		0.00777	23.5027	-0.00522	23.5027	-0.00266	23.5027		0.00735	28.2535	-0.00421	28.2535	-0.00107	28.2535
	0.01261	6.81029	-0.01835	6.81029	-0.02409	6.81029		0.00788	10.7035	-0.01009	10.7035	-0.01229	10.7035		0.00982	7.74913	-0.01872	7.74913	-0.02762	7.74913		0.00785	15.4137	-0.00732	15.4137	-0.0068	15.4137			0.01069	13.9365	-0.00922	13.9365	-0.0091	13.9365		0.00779	23.4873	-0.00523	23.4873	-0.00266	23.4873		0.00737	28.2406	-0.00422	28.2406	-0.00106	28.2406
	0.01266	6.7898	-0.01837	6.7898	-0.02408	6.7898		0.00787	10.7253	-0.0101	10.7253	-0.01233	10.7253		0.00984	7.73134	-0.01875	7.73134	-0.02766	7.73134		0.00786	15.4086	-0.00735	15.4086	-0.00684	15.4086			0.0107	13.9204	-0.00923	13.9204	-0.0091	13.9204		0.00779	23.5221	-0.00525	23.5221	-0.0027	23.5221		0.00737	28.2858	-0.00423	28.2858	-0.00109	28.2858
	0.01266	6.82205	-0.01839	6.82205	-0.02412	6.82205		0.00789	10.7358	-0.01013	10.7358	-0.01237	10.7358		0.00984	7.70104	-0.01881	7.70104	-0.02777	7.70104		0.00788	15.3837	-0.00738	15.3837	-0.00688	15.3837			0.01072	13.9133	-0.00923	13.9133	-0.00909	13.9133		0.00781	23.5823	-0.00525	23.5823	-0.0027	23.5823		0.00738	28.305	-0.00425	28.305	-0.00111	28.305
	0.0127	6.79854	-0.01841	6.79854	-0.02412	6.79854		0.00788	10.6623	-0.01015	10.6623	-0.01242	10.6623		0.00985	7.75778	-0.01886	7.75778	-0.02787	7.75778		0.00788	15.4002	-0.0074	15.4002	-0.00691	15.4002			0.01073	13.8892	-0.00923	13.8892	-0.00909	13.8892		0.00781	23.5768	-0.00527	23.5768	-0.00274	23.5768		0.00741	28.2658	-0.00426	28.2658	-0.00111	28.2658
	0.01269	6.78616	-0.01843	6.78616	-0.02417	6.78616		0.00791	10.7386	-0.01017	10.7386	-0.01243	10.7386		0.00986	7.72394	-0.01892	7.72394	-0.02797	7.72394		0.00788	15.3849	-0.00742	15.3849	-0.00696	15.3849			0.01076	13.8524	-0.00924	13.8524	-0.00908	13.8524		0.00784	23.6232	-0.00529	23.6232	-0.00274	23.6232		0.00741	28.3644	-0.00428	28.3644	-0.00114	28.3644
	0.01272	6.78802	-0.01845	6.78802	-0.02418	6.78802		0.00791	10.6788	-0.01019	10.6788	-0.01248	10.6788		0.00989	7.7628	-0.01897	7.7628	-0.02805	7.7628		0.00789	15.3813	-0.00745	15.3813	-0.00701	15.3813			0.01077	13.8112	-0.00923	13.8112	-0.00908	13.8112		0.00785	23.6405	-0.0053	23.6405	-0.00275	23.6405		0.00739	28.3608	-0.00429	28.3608	-0.00119	28.3608
	0.01272	6.79267	-0.01847	6.79267	-0.02422	6.79267		0.00794	10.7069	-0.01022	10.7069	-0.0125	10.7069		0.00989	7.78472	-0.019	7.78472	-0.02811	7.78472		0.00792	15.3635	-0.00749	15.3635	-0.00705	15.3635			0.01077	13.7724	-0.00924	13.7724	-0.00908	13.7724		0.00784	23.6025	-0.00532	23.6025	-0.0028	23.6025		0.00742	28.3971	-0.00431	28.3971	-0.0012	28.3971
	0.01275	6.83629	-0.01849	6.83629	-0.02423	6.83629		0.00793	10.6764	-0.01024	10.6764	-0.01256	10.6764		0.0099	7.77844	-0.01906	7.77844	-0.02821	7.77844		0.00792	15.3132	-0.0075	15.3132	-0.00709	15.3132			0.01078	13.8031	-0.00924	13.8031	-0.00908	13.8031		0.00785	23.6397	-0.00534	23.6397	-0.00283	23.6397		0.00743	28.4169	-0.00432	28.4169	-0.00122	28.4169
	0.01275	6.79061	-0.0185	6.79061	-0.02425	6.79061		0.00795	10.654	-0.01027	10.654	-0.01258	10.654		0.00991	7.80819	-0.01911	7.80819	-0.02831	7.80819		0.00792	15.2982	-0.00753	15.2982	-0.00714	15.2982			0.01078	13.725	-0.00924	13.725	-0.00908	13.725		0.00785	23.6479	-0.00535	23.6479	-0.00285	23.6479		0.00744	28.4201	-0.00434	28.4201	-0.00124	28.4201
	0.01278	6.78833	-0.01852	6.78833	-0.02426	6.78833		0.00795	10.6229	-0.0103	10.6229	-0.01264	10.6229		0.00991	7.76366	-0.01917	7.76366	-0.02842	7.76366		0.00793	15.2826	-0.00755	15.2826	-0.00716	15.2826			0.01081	13.7425	-0.00925	13.7425	-0.00908	13.7425		0.00787	23.6637	-0.00536	23.6637	-0.00285	23.6637		0.00744	28.4367	-0.00435	28.4367	-0.00127	28.4367
	0.01278	6.77603	-0.01854	6.77603	-0.0243	6.77603		0.00797	10.5977	-0.01032	10.5977	-0.01267	10.5977		0.00995	7.77813	-0.01919	7.77813	-0.02844	7.77813		0.00793	15.2532	-0.00757	15.2532	-0.00722	15.2532			0.01081	13.7094	-0.00925	13.7094	-0.00908	13.7094		0.00788	23.6672	-0.00538	23.6672	-0.00287	23.6672		0.00745	28.494	-0.00436	28.494	-0.00127	28.494
	0.01283	6.75619	-0.01857	6.75619	-0.02431	6.75619		0.00797	10.5433	-0.01035	10.5433	-0.01272	10.5433		0.00996	7.7505	-0.01925	7.7505	-0.02854	7.7505		0.00795	15.2104	-0.00759	15.2104	-0.00723	15.2104			0.01084	13.6247	-0.00925	13.6247	-0.00907	13.6247		0.00789	23.7367	-0.0054	23.7367	-0.0029	23.7367		0.00744	28.545	-0.00438	28.545	-0.00133	28.545
	0.01283	6.78173	-0.01859	6.78173	-0.02435	6.78173		0.00799	10.5844	-0.01037	10.5844	-0.01275	10.5844		0.00996	7.72113	-0.01928	7.72113	-0.0286	7.72113		0.00797	15.2143	-0.00762	15.2143	-0.00727	15.2143			0.01084	13.6042	-0.00925	13.6042	-0.00907	13.6042		0.0079	23.7523	-0.00542	23.7523	-0.00293	23.7523		0.00747	28.5563	-0.00438	28.5563	-0.0013	28.5563
	0.01286	6.80234	-0.01861	6.80234	-0.02436	6.80234		0.00799	10.5919	-0.0104	10.5919	-0.01281	10.5919		0.00997	7.77323	-0.01933	7.77323	-0.0287	7.77323		0.00797	15.1609	-0.00765	15.1609	-0.00732	15.1609			0.01085	13.6546	-0.00925	13.6546	-0.00907	13.6546		0.00792	23.7708	-0.00542	23.7708	-0.00293	23.7708		0.00748	28.565	-0.00439	28.565	-0.0013	28.565
	0.01285	6.81034	-0.01862	6.81034	-0.02439	6.81034		0.00802	10.5989	-0.01042	10.5989	-0.01282	10.5989		0.01	7.7451	-0.01939	7.7451	-0.02878	7.7451		0.00798	15.177	-0.00766	15.177	-0.00734	15.177			0.01085	13.6384	-0.00925	13.6384	-0.00908	13.6384		0.00792	23.7548	-0.00544	23.7548	-0.00297	23.7548		0.00749	28.5451	-0.00441	28.5451	-0.00133	28.5451
	0.01288	6.8237	-0.01864	6.8237	-0.0244	6.8237		0.00802	10.6045	-0.01044	10.6045	-0.01287	10.6045		0.01	7.76505	-0.01944	7.76505	-0.02889	7.76505		0.008	15.1581	-0.00769	15.1581	-0.00738	15.1581			0.01087	13.6291	-0.00926	13.6291	-0.00907	13.6291		0.00793	23.8437	-0.00546	23.8437	-0.00299	23.8437		0.00749	28.6362	-0.00442	28.6362	-0.00136	28.6362
	0.0129	6.83774	-0.01866	6.83774	-0.02442	6.83774		0.00804	10.5718	-0.01046	10.5718	-0.01289	10.5718		0.01001	7.81057	-0.01947	7.81057	-0.02893	7.81057		0.008	15.1265	-0.00772	15.1265	-0.00743	15.1265			0.01088	13.6197	-0.00926	13.6197	-0.00908	13.6197		0.00793	23.8404	-0.00548	23.8404	-0.00303	23.8404		0.00749	28.6639	-0.00444	28.6639	-0.00139	28.6639
	0.01291	6.83349	-0.01868	6.83349	-0.02445	6.83349		0.00803	10.4321	-0.01049	10.4321	-0.01295	10.4321		0.01004	7.75715	-0.01953	7.75715	-0.02902	7.75715		0.00801	15.1085	-0.00774	15.1085	-0.00748	15.1085			0.01092	13.5442	-0.00926	13.5442	-0.00905	13.5442		0.00795	23.8536	-0.0055	23.8536	-0.00305	23.8536		0.00753	28.6719	-0.00445	28.6719	-0.00138	28.6719
	0.01291	6.86707	-0.01871	6.86707	-0.02451	6.86707		0.00805	10.535	-0.01052	10.535	-0.01298	10.535		0.01004	7.81439	-0.01958	7.81439	-0.02913	7.81439		0.00802	15.0961	-0.00777	15.0961	-0.00752	15.0961			0.01092	13.5667	-0.00927	13.5667	-0.00906	13.5667		0.00796	23.9015	-0.00552	23.9015	-0.00308	23.9015		0.00753	28.6367	-0.00447	28.6367	-0.00141	28.6367
	0.01294	6.81361	-0.01873	6.81361	-0.02452	6.81361		0.00806	10.5099	-0.01054	10.5099	-0.01302	10.5099		0.01006	7.81859	-0.01961	7.81859	-0.02916	7.81859		0.00803	15.0643	-0.0078	15.0643	-0.00756	15.0643			0.01094	13.5566	-0.00927	13.5566	-0.00905	13.5566		0.00798	23.8972	-0.00554	23.8972	-0.0031	23.8972		0.00753	28.7234	-0.00448	28.7234	-0.00142	28.7234
	0.01296	6.80723	-0.01875	6.80723	-0.02454	6.80723		0.00807	10.48	-0.01057	10.48	-0.01306	10.48		0.01006	7.83276	-0.01964	7.83276	-0.02922	7.83276		0.00804	15.0778	-0.00781	15.0778	-0.00759	15.0778			0.01095	13.5506	-0.00927	13.5506	-0.00905	13.5506		0.00799	23.8757	-0.00555	23.8757	-0.0031	23.8757		0.00755	28.6971	-0.00449	28.6971	-0.00143	28.6971
	0.01298	6.85889	-0.01877	6.85889	-0.02456	6.85889		0.00807	10.5524	-0.01059	10.5524	-0.01311	10.5524		0.01006	7.80623	-0.01969	7.80623	-0.02933	7.80623		0.00805	15.0763	-0.00785	15.0763	-0.00765	15.0763			0.01098	13.486	-0.00927	13.486	-0.00905	13.486		0.008	23.9279	-0.00557	23.9279	-0.00313	23.9279		0.00756	28.7517	-0.0045	28.7517	-0.00144	28.7517
	0.01299	6.82271	-0.0188	6.82271	-0.02461	6.82271		0.00809	10.5374	-0.01061	10.5374	-0.01312	10.5374		0.01009	7.80224	-0.01975	7.80224	-0.02941	7.80224		0.00807	15.0395	-0.00787	15.0395	-0.00767	15.0395			0.01096	13.4577	-0.00927	13.4577	-0.00905	13.4577		0.008	23.9196	-0.00558	23.9196	-0.00317	23.9196		0.00758	28.7562	-0.00452	28.7562	-0.00145	28.7562
	0.01301	6.80278	-0.01882	6.80278	-0.02463	6.80278		0.0081	10.509	-0.01063	10.509	-0.01317	10.509		0.01011	7.81618	-0.01981	7.81618	-0.0295	7.81618		0.00808	15.1054	-0.0079	15.1054	-0.00771	15.1054			0.01098	13.413	-0.00928	13.413	-0.00905	13.413		0.008	23.9014	-0.0056	23.9014	-0.00321	23.9014		0.00757	28.7858	-0.00453	28.7858	-0.00149	28.7858
	0.01301	6.81773	-0.01883	6.81773	-0.02465	6.81773		0.00811	10.502	-0.01066	10.502	-0.01322	10.502		0.01011	7.8335	-0.01986	7.8335	-0.02961	7.8335		0.00809	15.038	-0.00791	15.038	-0.00773	15.038			0.01099	13.4105	-0.00928	13.4105	-0.00905	13.4105		0.00801	23.8861	-0.00561	23.8861	-0.00322	23.8861		0.00758	28.855	-0.00454	28.855	-0.0015	28.855
	0.01304	6.89172	-0.01886	6.89172	-0.02468	6.89172		0.00812	10.4743	-0.01068	10.4743	-0.01325	10.4743		0.01012	7.84271	-0.01989	7.84271	-0.02966	7.84271		0.0081	15.025	-0.00794	15.025	-0.00778	15.025			0.011	13.3819	-0.00928	13.3819	-0.00905	13.3819		0.00804	23.9597	-0.00563	23.9597	-0.00322	23.9597		0.00758	28.8108	-0.00455	28.8108	-0.00153	28.8108
	0.01304	6.88266	-0.01888	6.88266	-0.02472	6.88266		0.00813	10.4522	-0.01071	10.4522	-0.01329	10.4522		0.01015	7.8725	-0.01994	7.8725	-0.02974	7.8725		0.00809	15.0224	-0.00797	15.0224	-0.00784	15.0224			0.01105	13.3646	-0.00929	13.3646	-0.00903	13.3646		0.00805	23.9956	-0.00565	23.9956	-0.00325	23.9956		0.0076	28.8794	-0.00457	28.8794	-0.00154	28.8794
	0.01307	6.77344	-0.01889	6.77344	-0.02471	6.77344		0.00813	10.5238	-0.01074	10.5238	-0.01335	10.5238		0.01015	7.90186	-0.02	7.90186	-0.02985	7.90186		0.00812	15.016	-0.00798	15.016	-0.00785	15.016			0.01107	13.3374	-0.00929	13.3374	-0.00902	13.3374		0.00805	23.9846	-0.00566	23.9846	-0.00327	23.9846		0.00761	28.9216	-0.00458	28.9216	-0.00154	28.9216
	0.01309	6.86498	-0.01891	6.86498	-0.02473	6.86498		0.00815	10.4007	-0.01077	10.4007	-0.01338	10.4007		0.01016	7.90853	-0.02003	7.90853	-0.0299	7.90853		0.00812	14.9849	-0.00801	14.9849	-0.0079	14.9849			0.01106	13.2685	-0.00929	13.2685	-0.00904	13.2685		0.00805	24.0114	-0.00569	24.0114	-0.00333	24.0114		0.00763	28.8383	-0.00459	28.8383	-0.00155	28.8383
	0.0131	6.86378	-0.01893	6.86378	-0.02476	6.86378		0.00815	10.4011	-0.01079	10.4011	-0.01343	10.4011		0.01016	7.86319	-0.02006	7.86319	-0.02995	7.86319		0.00812	14.956	-0.00803	14.956	-0.00793	14.956			0.01107	13.2933	-0.00929	13.2933	-0.00903	13.2933		0.00806	24.0341	-0.0057	24.0341	-0.00334	24.0341		0.00762	28.9206	-0.00461	28.9206	-0.0016	28.9206
	0.0131	6.80806	-0.01896	6.80806	-0.02482	6.80806		0.00817	10.3772	-0.01081	10.3772	-0.01345	10.3772		0.01018	7.86216	-0.02011	7.86216	-0.03004	7.86216		0.00816	14.9715	-0.00805	14.9715	-0.00795	14.9715			0.01107	13.2496	-0.00929	13.2496	-0.00904	13.2496		0.00809	24.0561	-0.00572	24.0561	-0.00334	24.0561		0.00764	28.9589	-0.00462	28.9589	-0.00161	28.9589
	0.01315	6.86839	-0.01898	6.86839	-0.02481	6.86839		0.00818	10.4064	-0.01084	10.4064	-0.01349	10.4064		0.0102	7.86583	-0.02017	7.86583	-0.03013	7.86583		0.00813	14.9798	-0.00807	14.9798	-0.00801	14.9798			0.0111	13.2315	-0.00929	13.2315	-0.00903	13.2315		0.00809	24.0308	-0.00573	24.0308	-0.00336	24.0308		0.00763	28.9737	-0.00464	28.9737	-0.00165	28.9737
	0.01312	6.81963	-0.01901	6.81963	-0.0249	6.81963		0.00819	10.3791	-0.01086	10.3791	-0.01353	10.3791		0.01021	7.90398	-0.02022	7.90398	-0.03023	7.90398		0.00816	14.9644	-0.0081	14.9644	-0.00804	14.9644			0.01113	13.2536	-0.0093	13.2536	-0.00902	13.2536		0.00809	24.051	-0.00575	24.051	-0.0034	24.051		0.00764	29.0146	-0.00465	29.0146	-0.00167	29.0146
	0.01315	6.81869	-0.01904	6.81869	-0.02493	6.81869		0.00819	10.4243	-0.01089	10.4243	-0.01359	10.4243		0.01022	7.90039	-0.02028	7.90039	-0.03034	7.90039		0.00817	14.968	-0.00812	14.968	-0.00806	14.968			0.01113	13.1866	-0.0093	13.1866	-0.00902	13.1866		0.0081	24.1279	-0.00576	24.1279	-0.00343	24.1279		0.00767	28.9642	-0.00466	28.9642	-0.00165	28.9642
	0.01315	6.86163	-0.01905	6.86163	-0.02495	6.86163		0.00822	10.2788	-0.01091	10.2788	-0.0136	10.2788		0.01022	7.90439	-0.02033	7.90439	-0.03045	7.90439		0.00818	14.9935	-0.00814	14.9935	-0.0081	14.9935			0.01111	13.1374	-0.0093	13.1374	-0.00904	13.1374		0.00811	24.1259	-0.00578	24.1259	-0.00346	24.1259		0.00766	29.0784	-0.00468	29.0784	-0.00169	29.0784
	0.01317	6.84583	-0.01908	6.84583	-0.02499	6.84583		0.0082	10.3274	-0.01093	10.3274	-0.01367	10.3274		0.01025	7.90617	-0.02039	7.90617	-0.03053	7.90617		0.00818	14.9252	-0.00816	14.9252	-0.00814	14.9252			0.01114	13.1161	-0.00931	13.1161	-0.00902	13.1161		0.00813	24.1242	-0.0058	24.1242	-0.00347	24.1242		0.00769	29.0739	-0.00468	29.0739	-0.00168	29.0739
	0.01322	6.84525	-0.0191	6.84525	-0.02498	6.84525		0.00822	10.3161	-0.01095	10.3161	-0.01369	10.3161		0.01026	7.92408	-0.02044	7.92408	-0.03063	7.92408		0.00819	14.927	-0.00819	14.927	-0.00818	14.927			0.01114	13.0812	-0.00931	13.0812	-0.00902	13.0812		0.00813	24.1277	-0.00581	24.1277	-0.00349	24.1277		0.00768	29.0825	-0.00469	29.0825	-0.0017	29.0825
	0.0132	6.79805	-0.01912	6.79805	-0.02504	6.79805		0.00822	10.2609	-0.01098	10.2609	-0.01374	10.2609		0.01026	7.94322	-0.02047	7.94322	-0.03068	7.94322		0.00821	14.9198	-0.00821	14.9198	-0.00822	14.9198			0.01117	13.0664	-0.00931	13.0664	-0.00902	13.0664		0.00814	24.189	-0.00584	24.189	-0.00354	24.189		0.0077	29.0559	-0.00471	29.0559	-0.00172	29.0559
	0.01325	6.88203	-0.01915	6.88203	-0.02505	6.88203		0.00823	10.2675	-0.01101	10.2675	-0.01378	10.2675		0.01027	7.92233	-0.02053	7.92233	-0.03079	7.92233		0.00821	14.9065	-0.00823	14.9065	-0.00825	14.9065			0.0112	12.98	-0.00931	12.98	-0.00901	12.98		0.00817	24.1461	-0.00585	24.1461	-0.00353	24.1461		0.00771	29.0908	-0.00472	29.0908	-0.00174	29.0908
	0.01325	6.86255	-0.01917	6.86255	-0.02509	6.86255		0.00826	10.2654	-0.01103	10.2654	-0.01379	10.2654		0.01028	7.93442	-0.02058	7.93442	-0.03089	7.93442		0.00823	14.8853	-0.00825	14.8853	-0.00826	14.8853			0.01118	12.9372	-0.00932	12.9372	-0.00902	12.9372		0.00816	24.1495	-0.00587	24.1495	-0.00358	24.1495		0.00772	29.173	-0.00474	29.173	-0.00176	29.173
	0.01326	6.81027	-0.01919	6.81027	-0.02512	6.81027		0.00825	10.2024	-0.01105	10.2024	-0.01384	10.2024		0.0103	7.96838	-0.02064	7.96838	-0.03098	7.96838		0.00824	14.849	-0.00826	14.849	-0.00829	14.849			0.0112	12.9516	-0.00933	12.9516	-0.00903	12.9516		0.00818	24.2099	-0.00589	24.2099	-0.00359	24.2099		0.00773	29.1809	-0.00476	29.1809	-0.00179	29.1809
	0.01328	6.88286	-0.01922	6.88286	-0.02516	6.88286		0.00828	10.1563	-0.01107	10.1563	-0.01386	10.1563		0.01031	7.99661	-0.02064	7.99661	-0.03097	7.99661		0.00824	14.8839	-0.0083	14.8839	-0.00836	14.8839			0.01124	12.8912	-0.00933	12.8912	-0.00902	12.8912		0.00818	24.2186	-0.00591	24.2186	-0.00363	24.2186		0.00774	29.147	-0.00478	29.147	-0.00181	29.147
	0.01328	6.87617	-0.01924	6.87617	-0.0252	6.87617		0.00828	10.1478	-0.01109	10.1478	-0.0139	10.1478		0.01032	8.00201	-0.02069	8.00201	-0.03107	8.00201		0.00826	14.8701	-0.00832	14.8701	-0.00838	14.8701			0.01124	12.851	-0.00933	12.851	-0.00902	12.851		0.00819	24.189	-0.00592	24.189	-0.00366	24.189		0.00773	29.149	-0.00478	29.149	-0.00184	29.149
	0.01328	6.82768	-0.01926	6.82768	-0.02524	6.82768		0.00829	10.1373	-0.01112	10.1373	-0.01394	10.1373		0.01035	7.97461	-0.02075	7.97461	-0.03115	7.97461		0.00826	14.8125	-0.00835	14.8125	-0.00843	14.8125			0.01124	12.8638	-0.00933	12.8638	-0.00902	12.8638		0.00821	24.2149	-0.00592	24.2149	-0.00364	24.2149		0.00774	29.1895	-0.0048	29.1895	-0.00186	29.1895
	0.01331	6.86722	-0.01929	6.86722	-0.02527	6.86722		0.0083	10.1029	-0.01115	10.1029	-0.014	10.1029		0.01036	7.98452	-0.02081	7.98452	-0.03125	7.98452		0.00829	14.7902	-0.00836	14.7902	-0.00843	14.7902			0.01128	12.7859	-0.00934	12.7859	-0.00902	12.7859		0.00821	24.2355	-0.00594	24.2355	-0.00368	24.2355		0.00778	29.1555	-0.00481	29.1555	-0.00184	29.1555
	0.01334	6.78246	-0.01931	6.78246	-0.02528	6.78246		0.0083	10.0768	-0.01117	10.0768	-0.01405	10.0768		0.01035	7.9875	-0.02083	7.9875	-0.03132	7.9875		0.00829	14.7829	-0.00838	14.7829	-0.00847	14.7829			0.01127	12.7795	-0.00934	12.7795	-0.00903	12.7795		0.00823	24.2555	-0.00597	24.2555	-0.00371	24.2555		0.00777	29.1312	-0.00483	29.1312	-0.00189	29.1312
	0.01336	6.89367	-0.01934	6.89367	-0.02532	6.89367		0.0083	10.066	-0.0112	10.066	-0.0141	10.066		0.01037	7.98924	-0.02086	7.98924	-0.03135	7.98924		0.0083	14.7634	-0.00841	14.7634	-0.00851	14.7634			0.01129	12.8047	-0.00935	12.8047	-0.00902	12.8047		0.00823	24.264	-0.00598	24.264	-0.00373	24.264		0.00778	29.0854	-0.00484	29.0854	-0.0019	29.0854
	0.01339	6.86305	-0.01936	6.86305	-0.02533	6.86305		0.00832	10.0155	-0.01122	10.0155	-0.01413	10.0155		0.01037	8.04379	-0.02089	8.04379	-0.03141	8.04379		0.00831	14.7612	-0.00842	14.7612	-0.00854	14.7612			0.01131	12.8477	-0.00936	12.8477	-0.00902	12.8477		0.00823	24.2955	-0.00601	24.2955	-0.00379	24.2955		0.00778	29.1347	-0.00485	29.1347	-0.00193	29.1347
	0.01339	6.87631	-0.01939	6.87631	-0.02539	6.87631		0.00834	10.0222	-0.01125	10.0222	-0.01416	10.0222		0.01037	8.06179	-0.02094	8.06179	-0.03152	8.06179		0.0083	14.8143	-0.00846	14.8143	-0.00862	14.8143			0.01132	12.8249	-0.00936	12.8249	-0.00902	12.8249		0.00825	24.2881	-0.00603	24.2881	-0.00381	24.2881		0.00778	29.0978	-0.00487	29.0978	-0.00196	29.0978
	0.01339	6.84777	-0.01941	6.84777	-0.02543	6.84777		0.00835	10.0061	-0.01128	10.0061	-0.0142	10.0061		0.01041	8.04217	-0.021	8.04217	-0.03159	8.04217		0.00832	14.7531	-0.00848	14.7531	-0.00863	14.7531			0.01133	12.7633	-0.00937	12.7633	-0.00903	12.7633		0.00826	24.3148	-0.00605	24.3148	-0.00383	24.3148		0.00781	29.0973	-0.00488	29.0973	-0.00196	29.0973
	0.01342	6.80613	-0.01944	6.80613	-0.02546	6.80613		0.00837	10.0347	-0.0113	10.0347	-0.01423	10.0347		0.01041	8.04363	-0.02106	8.04363	-0.0317	8.04363		0.00833	14.7599	-0.00851	14.7599	-0.0087	14.7599			0.01135	12.7836	-0.00937	12.7836	-0.00903	12.7836		0.00827	24.3468	-0.00606	24.3468	-0.00384	24.3468		0.0078	29.1304	-0.0049	29.1304	-0.002	29.1304
	0.01344	6.82928	-0.01946	6.82928	-0.02548	6.82928		0.00837	10.0367	-0.01133	10.0367	-0.01428	10.0367		0.01043	8.05144	-0.02111	8.05144	-0.03179	8.05144		0.00834	14.7417	-0.00852	14.7417	-0.0087	14.7417			0.01136	12.74	-0.00937	12.74	-0.00903	12.74		0.00829	24.3767	-0.00608	24.3767	-0.00388	24.3767		0.00783	29.1552	-0.00492	29.1552	-0.002	29.1552
	0.01344	6.81647	-0.01949	6.81647	-0.02554	6.81647		0.00837	9.95339	-0.01135	9.95339	-0.01432	9.95339		0.01042	8.08272	-0.02117	8.08272	-0.03191	8.08272		0.00835	14.748	-0.00856	14.748	-0.00877	14.748			0.01139	12.6748	-0.00938	12.6748	-0.00902	12.6748		0.0083	24.368	-0.0061	24.368	-0.00391	24.368		0.00783	29.0784	-0.00493	29.0784	-0.00203	29.0784
	0.01347	6.84084	-0.01951	6.84084	-0.02555	6.84084		0.00839	9.98315	-0.01137	9.98315	-0.01435	9.98315		0.01046	8.09091	-0.02119	8.09091	-0.03193	8.09091		0.00835	14.7389	-0.00858	14.7389	-0.0088	14.7389			0.01136	12.6698	-0.00938	12.6698	-0.00904	12.6698		0.0083	24.3757	-0.00611	24.3757	-0.00393	24.3757		0.00784	29.1151	-0.00495	29.1151	-0.00207	29.1151
	0.01347	6.89389	-0.01952	6.89389	-0.02557	6.89389		0.0084	9.94771	-0.0114	9.94771	-0.0144	9.94771		0.01047	8.06793	-0.02125	8.06793	-0.03203	8.06793		0.00838	14.7168	-0.00859	14.7168	-0.0088	14.7168			0.01138	12.6386	-0.00939	12.6386	-0.00904	12.6386		0.0083	24.36	-0.00613	24.36	-0.00396	24.36		0.00785	29.0885	-0.00496	29.0885	-0.00207	29.0885
	0.01352	6.91334	-0.01954	6.91334	-0.02556	6.91334		0.0084	9.95515	-0.01142	9.95515	-0.01444	9.95515		0.01048	8.05017	-0.02131	8.05017	-0.03213	8.05017		0.00838	14.6211	-0.00863	14.6211	-0.00888	14.6211			0.0114	12.624	-0.00939	12.624	-0.00904	12.624		0.00831	24.3808	-0.00615	24.3808	-0.00399	24.3808		0.00786	29.1206	-0.00498	29.1206	-0.00209	29.1206
	0.01352	6.83925	-0.01956	6.83925	-0.0256	6.83925		0.00842	9.95986	-0.01144	9.95986	-0.01447	9.95986		0.01048	8.04535	-0.02136	8.04535	-0.03224	8.04535		0.00838	14.5563	-0.00865	14.5563	-0.00891	14.5563			0.01143	12.6009	-0.0094	12.6009	-0.00903	12.6009		0.00834	24.3519	-0.00616	24.3519	-0.00398	24.3519		0.00788	29.0974	-0.00499	29.0974	-0.0021	29.0974
	0.01354	6.80743	-0.01959	6.80743	-0.02564	6.80743		0.00842	9.98867	-0.01146	9.98867	-0.01451	9.98867		0.01049	8.02957	-0.02142	8.02957	-0.03234	8.02957		0.0084	14.5518	-0.00867	14.5518	-0.00895	14.5518			0.01142	12.5894	-0.0094	12.5894	-0.00904	12.5894		0.00834	24.4032	-0.00618	24.4032	-0.00402	24.4032		0.00788	29.1066	-0.005	29.1066	-0.00212	29.1066
	0.01355	6.87174	-0.01962	6.87174	-0.02569	6.87174		0.00845	9.96199	-0.01149	9.96199	-0.01453	9.96199		0.01051	8.02528	-0.02147	8.02528	-0.03243	8.02528		0.0084	14.5443	-0.00868	14.5443	-0.00896	14.5443			0.01146	12.5738	-0.0094	12.5738	-0.00904	12.5738		0.00834	24.4371	-0.0062	24.4371	-0.00406	24.4371		0.00789	29.1057	-0.00502	29.1057	-0.00216	29.1057
	0.01354	6.89096	-0.01965	6.89096	-0.02576	6.89096		0.00845	9.87025	-0.01151	9.87025	-0.01457	9.87025		0.01052	8.01813	-0.02153	8.01813	-0.03254	8.01813		0.00842	14.4931	-0.00872	14.4931	-0.00901	14.4931			0.01147	12.5525	-0.00941	12.5525	-0.00904	12.5525		0.00834	24.4107	-0.00621	24.4107	-0.00408	24.4107		0.00789	29.0796	-0.00504	29.0796	-0.00219	29.0796
	0.01357	6.90786	-0.01967	6.90786	-0.02577	6.90786		0.00846	9.89364	-0.01154	9.89364	-0.01461	9.89364		0.01054	7.98148	-0.02158	7.98148	-0.03263	7.98148		0.00843	14.5507	-0.00873	14.5507	-0.00904	14.5507			0.01146	12.5548	-0.00941	12.5548	-0.00905	12.5548		0.00836	24.4853	-0.00624	24.4853	-0.00411	24.4853		0.0079	29.1721	-0.00505	29.1721	-0.00219	29.1721
	0.01362	6.82352	-0.01969	6.82352	-0.02576	6.82352		0.00847	9.86239	-0.01156	9.86239	-0.01465	9.86239		0.01054	7.98027	-0.02164	7.98027	-0.03274	7.98027		0.00844	14.4846	-0.00877	14.4846	-0.0091	14.4846			0.01151	12.53	-0.00942	12.53	-0.00904	12.53		0.00838	24.4642	-0.00625	24.4642	-0.00413	24.4642		0.00791	29.15	-0.00506	29.15	-0.00221	29.15
	0.01362	6.84139	-0.01971	6.84139	-0.0258	6.84139		0.00846	9.97691	-0.01159	9.97691	-0.01471	9.97691		0.01058	7.97602	-0.02169	7.97602	-0.03281	7.97602		0.00845	14.4645	-0.00879	14.4645	-0.00913	14.4645			0.0115	12.4971	-0.00942	12.4971	-0.00905	12.4971		0.00839	24.5171	-0.00627	24.5171	-0.00416	24.5171		0.00793	29.2026	-0.00508	29.2026	-0.00222	29.2026
	0.01363	6.79808	-0.01973	6.79808	-0.02583	6.79808		0.00848	9.97295	-0.01161	9.97295	-0.01473	9.97295		0.01058	7.94797	-0.02175	7.94797	-0.03292	7.94797		0.00846	14.4578	-0.00882	14.4578	-0.00917	14.4578			0.0115	12.42	-0.00943	12.42	-0.00905	12.42		0.00839	24.5396	-0.00629	24.5396	-0.00419	24.5396		0.00794	29.2311	-0.00508	29.2311	-0.00223	29.2311
	0.01363	6.90114	-0.01977	6.90114	-0.02591	6.90114		0.00851	9.95178	-0.01163	9.95178	-0.01475	9.95178		0.01059	7.96098	-0.02178	7.96098	-0.03297	7.96098		0.00847	14.4342	-0.00884	14.4342	-0.00921	14.4342			0.01151	12.4673	-0.00943	12.4673	-0.00905	12.4673		0.0084	24.4973	-0.00631	24.4973	-0.00422	24.4973		0.00794	29.2497	-0.0051	29.2497	-0.00226	29.2497
	0.01363	6.87249	-0.01979	6.87249	-0.02595	6.87249		0.00851	9.94669	-0.01165	9.94669	-0.0148	9.94669		0.01061	7.91879	-0.02183	7.91879	-0.03306	7.91879		0.00849	14.438	-0.00887	14.438	-0.00925	14.438			0.01155	12.4452	-0.00944	12.4452	-0.00904	12.4452		0.00842	24.5397	-0.00633	24.5397	-0.00424	24.5397		0.00795	29.2375	-0.00512	29.2375	-0.00228	29.2375
	0.01365	6.85389	-0.01981	6.85389	-0.02597	6.85389		0.00852	9.91527	-0.01167	9.91527	-0.01482	9.91527		0.01063	7.93004	-0.02189	7.93004	-0.03315	7.93004		0.00849	14.391	-0.0089	14.391	-0.0093	14.391			0.01155	12.4466	-0.00944	12.4466	-0.00904	12.4466		0.00842	24.6014	-0.00635	24.6014	-0.00428	24.6014		0.00796	29.2331	-0.00513	29.2331	-0.0023	29.2331
	0.01368	6.78539	-0.01983	6.78539	-0.02598	6.78539		0.00852	9.87646	-0.0117	9.87646	-0.01488	9.87646		0.01063	7.93305	-0.02194	7.93305	-0.03326	7.93305		0.00849	14.3589	-0.00891	14.3589	-0.00934	14.3589			0.01158	12.4024	-0.00944	12.4024	-0.00904	12.4024		0.00844	24.5645	-0.00637	24.5645	-0.0043	24.5645		0.00798	29.2165	-0.00515	29.2165	-0.00231	29.2165
	0.0137	6.86359	-0.01986	6.86359	-0.02602	6.86359		0.00852	9.85267	-0.01173	9.85267	-0.01494	9.85267		0.01064	7.92366	-0.022	7.92366	-0.03336	7.92366		0.00852	14.3282	-0.00894	14.3282	-0.00936	14.3282			0.01157	12.4415	-0.00945	12.4415	-0.00905	12.4415		0.00844	24.5554	-0.00639	24.5554	-0.00433	24.5554		0.00798	29.2047	-0.00517	29.2047	-0.00236	29.2047
	0.01371	6.76964	-0.0199	6.76964	-0.02609	6.76964		0.00853	9.87876	-0.01176	9.87876	-0.01498	9.87876		0.01064	7.93653	-0.02208	7.93653	-0.03353	7.93653		0.00851	14.2684	-0.00898	14.2684	-0.00944	14.2684			0.0116	12.381	-0.00945	12.381	-0.00905	12.381		0.00845	24.5773	-0.0064	24.5773	-0.00434	24.5773		0.00799	29.212	-0.00518	29.212	-0.00238	29.212
	0.01374	6.76187	-0.01994	6.76187	-0.02614	6.76187		0.00855	9.8193	-0.01179	9.8193	-0.01502	9.8193		0.01067	7.92932	-0.02211	7.92932	-0.03355	7.92932		0.00852	14.2352	-0.00899	14.2352	-0.00947	14.2352			0.01161	12.3838	-0.00946	12.3838	-0.00905	12.3838		0.00847	24.6653	-0.00642	24.6653	-0.00438	24.6653		0.00799	29.2281	-0.0052	29.2281	-0.00241	29.2281
	0.01376	6.80541	-0.01997	6.80541	-0.02618	6.80541		0.00856	9.85745	-0.01181	9.85745	-0.01505	9.85745		0.01068	7.89844	-0.02214	7.89844	-0.0336	7.89844		0.00852	14.2272	-0.00903	14.2272	-0.00954	14.2272			0.01164	12.3754	-0.00946	12.3754	-0.00905	12.3754		0.00847	24.6012	-0.00644	24.6012	-0.00442	24.6012		0.008	29.2334	-0.00522	29.2334	-0.00243	29.2334
	0.01376	6.74943	-0.02	6.74943	-0.02624	6.74943		0.00857	9.81184	-0.01183	9.81184	-0.01508	9.81184		0.01068	7.889	-0.02222	7.889	-0.03376	7.889		0.00855	14.2289	-0.00906	14.2289	-0.00957	14.2289			0.01161	12.3862	-0.00947	12.3862	-0.00906	12.3862		0.00848	24.6139	-0.00646	24.6139	-0.00444	24.6139		0.008	29.2343	-0.00524	29.2343	-0.00248	29.2343
	0.01379	6.78586	-0.02002	6.78586	-0.02625	6.78586		0.00859	9.84014	-0.01185	9.84014	-0.01511	9.84014		0.01068	7.89967	-0.02225	7.89967	-0.03382	7.89967		0.00856	14.2026	-0.00909	14.2026	-0.00961	14.2026			0.01165	12.3829	-0.00947	12.3829	-0.00905	12.3829		0.00849	24.646	-0.00647	24.646	-0.00445	24.646		0.00802	29.1878	-0.00525	29.1878	-0.00249	29.1878
	0.01379	6.71267	-0.02004	6.71267	-0.02629	6.71267		0.0086	9.7937	-0.01188	9.7937	-0.01516	9.7937		0.01071	7.89329	-0.02228	7.89329	-0.03385	7.89329		0.00855	14.1886	-0.0091	14.1886	-0.00965	14.1886			0.01166	12.3991	-0.00948	12.3991	-0.00905	12.3991		0.00851	24.6394	-0.00649	24.6394	-0.00447	24.6394		0.00802	29.1676	-0.00527	29.1676	-0.00252	29.1676
	0.01379	6.75735	-0.02006	6.75735	-0.02633	6.75735		0.0086	9.82692	-0.0119	9.82692	-0.0152	9.82692		0.01071	7.87277	-0.02236	7.87277	-0.03401	7.87277		0.00857	14.2085	-0.00913	14.2085	-0.00969	14.2085			0.01168	12.3716	-0.00948	12.3716	-0.00906	12.3716		0.00852	24.6318	-0.00651	24.6318	-0.0045	24.6318		0.00803	29.1684	-0.00528	29.1684	-0.00254	29.1684
	0.01381	6.81623	-0.02008	6.81623	-0.02635	6.81623		0.00862	9.74513	-0.01192	9.74513	-0.01523	9.74513		0.01073	7.8642	-0.02239	7.8642	-0.03405	7.8642		0.00859	14.1979	-0.00913	14.1979	-0.00966	14.1979			0.01169	12.3405	-0.00948	12.3405	-0.00905	12.3405		0.00852	24.6705	-0.00653	24.6705	-0.00454	24.6705		0.00804	29.1973	-0.0053	29.1973	-0.00256	29.1973
	0.01384	6.77756	-0.02011	6.77756	-0.02638	6.77756		0.00862	9.7687	-0.01195	9.7687	-0.01529	9.7687		0.01074	7.88461	-0.02247	7.88461	-0.0342	7.88461		0.0086	14.1497	-0.00922	14.1497	-0.00985	14.1497			0.01172	12.309	-0.00949	12.309	-0.00905	12.309		0.00852	24.6956	-0.00655	24.6956	-0.00457	24.6956		0.00804	29.2197	-0.00532	29.2197	-0.00261	29.2197
	0.01384	6.76299	-0.02012	6.76299	-0.0264	6.76299		0.00862	9.77595	-0.01198	9.77595	-0.01534	9.77595		0.01077	7.86358	-0.02247	7.86358	-0.03417	7.86358		0.0086	14.1311	-0.00922	14.1311	-0.00984	14.1311			0.01171	12.3251	-0.00949	12.3251	-0.00906	12.3251		0.00852	24.6872	-0.00657	24.6872	-0.00461	24.6872		0.00806	29.2169	-0.00533	29.2169	-0.0026	29.2169
	0.01387	6.77329	-0.02015	6.77329	-0.02643	6.77329		0.00863	9.7419	-0.012	9.7419	-0.01537	9.7419		0.01077	7.85327	-0.02256	7.85327	-0.03434	7.85327		0.0086	14.1425	-0.00922	14.1425	-0.00983	14.1425			0.01172	12.2802	-0.0095	12.2802	-0.00906	12.2802		0.00854	24.6736	-0.00658	24.6736	-0.00463	24.6736		0.00806	29.2321	-0.00535	29.2321	-0.00263	29.2321
	0.01387	6.82933	-0.02018	6.82933	-0.02649	6.82933		0.00865	9.79553	-0.01203	9.79553	-0.01541	9.79553		0.01078	7.82175	-0.02258	7.82175	-0.03439	7.82175		0.00861	14.1597	-0.00921	14.1597	-0.00982	14.1597			0.01173	12.295	-0.0095	12.295	-0.00906	12.295		0.00856	24.6807	-0.0066	24.6807	-0.00465	24.6807		0.00809	29.1871	-0.00536	29.1871	-0.00263	29.1871
	0.01389	6.7989	-0.0202	6.7989	-0.02651	6.7989		0.00865	9.64498	-0.01205	9.64498	-0.01545	9.64498		0.01078	7.83033	-0.02264	7.83033	-0.0345	7.83033		0.00864	14.1594	-0.00931	14.1594	-0.00998	14.1594			0.01176	12.315	-0.00951	12.315	-0.00906	12.315		0.00856	24.7277	-0.00663	24.7277	-0.0047	24.7277		0.00809	29.1931	-0.00538	29.1931	-0.00266	29.1931
	0.01392	6.82069	-0.02022	6.82069	-0.02652	6.82069		0.00867	9.70198	-0.01207	9.70198	-0.01547	9.70198		0.01082	7.86122	-0.02269	7.86122	-0.03457	7.86122		0.00864	14.1308	-0.00931	14.1308	-0.00998	14.1308			0.01177	12.371	-0.00952	12.371	-0.00906	12.371		0.00857	24.7207	-0.00665	24.7207	-0.00473	24.7207		0.00811	29.2029	-0.00539	29.2029	-0.00267	29.2029
	0.01392	6.83907	-0.02024	6.83907	-0.02656	6.83907		0.00867	9.69411	-0.0121	9.69411	-0.01552	9.69411		0.01081	7.81556	-0.02272	7.81556	-0.03463	7.81556		0.00864	14.1237	-0.00931	14.1237	-0.00997	14.1237			0.01177	12.2333	-0.00952	12.2333	-0.00907	12.2333		0.00859	24.7115	-0.00667	24.7115	-0.00475	24.7115		0.0081	29.1864	-0.00542	29.1864	-0.00273	29.1864
	0.01392	6.856	-0.02027	6.856	-0.02662	6.856		0.00868	9.73833	-0.01212	9.73833	-0.01556	9.73833		0.01083	7.8092	-0.02278	7.8092	-0.03473	7.8092		0.00864	14.1126	-0.0093	14.1126	-0.00996	14.1126			0.0118	12.2776	-0.00952	12.2776	-0.00906	12.2776		0.0086	24.7609	-0.00669	24.7609	-0.00478	24.7609		0.00812	29.199	-0.00543	29.199	-0.00274	29.199
	0.01395	6.78783	-0.02029	6.78783	-0.02663	6.78783		0.0087	9.72954	-0.01215	9.72954	-0.0156	9.72954		0.01086	7.82443	-0.02283	7.82443	-0.03481	7.82443		0.00867	14.1017	-0.0094	14.1017	-0.01013	14.1017			0.01177	12.202	-0.00952	12.202	-0.00908	12.202		0.0086	24.7493	-0.00672	24.7493	-0.00483	24.7493		0.00812	29.176	-0.00545	29.176	-0.00277	29.176
	0.01395	6.78821	-0.02031	6.78821	-0.02667	6.78821		0.0087	9.71156	-0.01217	9.71156	-0.01564	9.71156		0.01086	7.78028	-0.02289	7.78028	-0.03492	7.78028		0.00869	14.1359	-0.0094	14.1359	-0.0101	14.1359			0.0118	12.2119	-0.00953	12.2119	-0.00908	12.2119		0.00861	24.7659	-0.00674	24.7659	-0.00486	24.7659		0.00812	29.2156	-0.00545	29.2156	-0.00279	29.2156
	0.01397	6.8009	-0.02034	6.8009	-0.02671	6.8009		0.0087	9.66117	-0.01219	9.66117	-0.01569	9.66117		0.01088	7.80317	-0.02294	7.80317	-0.03501	7.80317		0.00869	14.128	-0.00939	14.128	-0.0101	14.128			0.01182	12.2103	-0.00953	12.2103	-0.00908	12.2103		0.00863	24.7541	-0.00675	24.7541	-0.00488	24.7541		0.00813	29.1952	-0.00547	29.1952	-0.00281	29.1952
	0.01402	6.80571	-0.02036	6.80571	-0.0267	6.80571		0.00872	9.64505	-0.01221	9.64505	-0.01571	9.64505		0.01088	7.78484	-0.02297	7.78484	-0.03506	7.78484		0.00869	14.0754	-0.00939	14.0754	-0.01009	14.0754			0.01187	12.2039	-0.00954	12.2039	-0.00906	12.2039		0.00864	24.7795	-0.00678	24.7795	-0.00493	24.7795		0.00815	29.1679	-0.00548	29.1679	-0.00282	29.1679
	0.01402	6.78774	-0.02037	6.78774	-0.02672	6.78774		0.00872	9.63558	-0.01224	9.63558	-0.01576	9.63558		0.01089	7.79844	-0.02303	7.79844	-0.03517	7.79844		0.0087	14.0621	-0.00949	14.0621	-0.01027	14.0621			0.01186	12.1854	-0.00954	12.1854	-0.00907	12.1854		0.00864	24.7823	-0.00679	24.7823	-0.00494	24.7823		0.00815	29.2022	-0.00551	29.2022	-0.00287	29.2022
	0.01405	6.82081	-0.0204	6.82081	-0.02675	6.82081		0.00873	9.57621	-0.01227	9.57621	-0.0158	9.57621		0.0109	7.7508	-0.02306	7.7508	-0.03521	7.7508		0.0087	14.0619	-0.00948	14.0619	-0.01027	14.0619			0.01186	12.1928	-0.00955	12.1928	-0.00908	12.1928		0.00864	24.7848	-0.00681	24.7848	-0.00498	24.7848		0.00815	29.2298	-0.00552	29.2298	-0.00288	29.2298
	0.01402	6.85758	-0.02042	6.85758	-0.02682	6.85758		0.00876	9.61281	-0.01229	9.61281	-0.01582	9.61281		0.01093	7.7499	-0.02308	7.7499	-0.03524	7.7499		0.00873	14.0377	-0.00948	14.0377	-0.01023	14.0377			0.0119	12.1791	-0.00955	12.1791	-0.00906	12.1791		0.00867	24.7751	-0.00684	24.7751	-0.00501	24.7751		0.00816	29.1958	-0.00553	29.1958	-0.0029	29.1958
	0.01405	6.80258	-0.02044	6.80258	-0.02683	6.80258		0.00876	9.65706	-0.01231	9.65706	-0.01586	9.65706		0.01093	7.75867	-0.02317	7.75867	-0.0354	7.75867		0.00873	14.0668	-0.00948	14.0668	-0.01023	14.0668			0.01188	12.1697	-0.00956	12.1697	-0.00907	12.1697		0.00868	24.7744	-0.00686	24.7744	-0.00504	24.7744		0.00816	29.1839	-0.00555	29.1839	-0.00293	29.1839
	0.01408	6.82963	-0.02047	6.82963	-0.02686	6.82963		0.00878	9.61741	-0.01234	9.61741	-0.01589	9.61741		0.01094	7.73439	-0.02319	7.73439	-0.03545	7.73439		0.00873	14.0351	-0.00958	14.0351	-0.01042	14.0351			0.01193	12.1973	-0.00956	12.1973	-0.00906	12.1973		0.00867	24.7859	-0.00689	24.7859	-0.0051	24.7859		0.00818	29.2104	-0.00556	29.2104	-0.00294	29.2104
	0.01411	6.7524	-0.0205	6.7524	-0.02689	6.7524		0.00876	9.54865	-0.01236	9.54865	-0.01595	9.54865		0.01094	7.72546	-0.02322	7.72546	-0.0355	7.72546		0.00874	14.0487	-0.00957	14.0487	-0.0104	14.0487			0.01194	12.1649	-0.00956	12.1649	-0.00906	12.1649		0.00868	24.7538	-0.00691	24.7538	-0.00513	24.7538		0.00819	29.1813	-0.00558	29.1813	-0.00296	29.1813
	0.01413	6.73432	-0.02052	6.73432	-0.02691	6.73432		0.00878	9.58506	-0.01238	9.58506	-0.01598	9.58506		0.01095	7.72661	-0.02331	7.72661	-0.03566	7.72661		0.00877	14.0583	-0.00957	14.0583	-0.01037	14.0583			0.01193	12.1559	-0.00957	12.1559	-0.00908	12.1559		0.00869	24.7834	-0.00692	24.7834	-0.00516	24.7834		0.00819	29.1718	-0.00558	29.1718	-0.00298	29.1718
	0.01413	6.79023	-0.02055	6.79023	-0.02697	6.79023		0.0088	9.51607	-0.0124	9.51607	-0.016	9.51607		0.01098	7.72429	-0.02333	7.72429	-0.03569	7.72429		0.00877	14.0634	-0.00957	14.0634	-0.01036	14.0634			0.01194	12.1162	-0.00957	12.1162	-0.00908	12.1162		0.00871	24.7973	-0.00694	24.7973	-0.00518	24.7973		0.0082	29.1762	-0.0056	29.1762	-0.003	29.1762
	0.01418	6.75469	-0.02057	6.75469	-0.02696	6.75469		0.00882	9.55387	-0.01242	9.55387	-0.01603	9.55387		0.01099	7.72614	-0.02342	7.72614	-0.03584	7.72614		0.00879	14.1079	-0.00966	14.1079	-0.01054	14.1079			0.01198	12.1271	-0.00958	12.1271	-0.00907	12.1271		0.00872	24.7677	-0.00695	24.7677	-0.00519	24.7677		0.0082	29.2141	-0.00561	29.2141	-0.00302	29.2141
	0.01418	6.7816	-0.02059	6.7816	-0.027	6.7816		0.00883	9.56443	-0.01245	9.56443	-0.01607	9.56443		0.011	7.70028	-0.02342	7.70028	-0.03583	7.70028		0.00879	14.0563	-0.00966	14.0563	-0.01053	14.0563			0.01198	12.145	-0.00959	12.145	-0.00908	12.145		0.00873	24.7673	-0.00697	24.7673	-0.00521	24.7673		0.0082	29.2577	-0.00562	29.2577	-0.00305	29.2577
	0.01416	6.80954	-0.02061	6.80954	-0.02706	6.80954		0.00883	9.54057	-0.01247	9.54057	-0.01612	9.54057		0.01102	7.71777	-0.0235	7.71777	-0.03598	7.71777		0.00881	14.0462	-0.00966	14.0462	-0.0105	14.0462			0.01198	12.1411	-0.00959	12.1411	-0.00908	12.1411		0.00873	24.8012	-0.007	24.8012	-0.00527	24.8012		0.00822	29.282	-0.00564	29.282	-0.00306	29.282
	0.01419	6.74485	-0.02064	6.74485	-0.02709	6.74485		0.00886	9.54108	-0.01249	9.54108	-0.01613	9.54108		0.01103	7.70192	-0.02353	7.70192	-0.03603	7.70192		0.0088	14.0377	-0.00975	14.0377	-0.01071	14.0377			0.01201	12.1451	-0.0096	12.1451	-0.00908	12.1451		0.00875	24.7629	-0.00702	24.7629	-0.00529	24.7629		0.00822	29.2511	-0.00565	29.2511	-0.00309	29.2511
	0.01421	6.86019	-0.02066	6.86019	-0.02711	6.86019		0.00886	9.52736	-0.01251	9.52736	-0.01616	9.52736		0.01103	7.69133	-0.02358	7.69133	-0.03614	7.69133		0.00882	14.029	-0.00975	14.029	-0.01068	14.029			0.01202	12.1204	-0.0096	12.1204	-0.00908	12.1204		0.00876	24.7887	-0.00705	24.7887	-0.00533	24.7887		0.00823	29.2577	-0.00568	29.2577	-0.00312	29.2577
	0.01422	6.76912	-0.02068	6.76912	-0.02714	6.76912		0.00885	9.44668	-0.01254	9.44668	-0.01622	9.44668		0.01105	7.69571	-0.02364	7.69571	-0.03623	7.69571		0.00882	14.0059	-0.00975	14.0059	-0.01068	14.0059			0.01202	12.1125	-0.0096	12.1125	-0.00909	12.1125		0.00878	24.7577	-0.00707	24.7577	-0.00535	24.7577		0.00825	29.2829	-0.00569	29.2829	-0.00313	29.2829
	0.01424	6.7723	-0.02071	6.7723	-0.02718	6.7723		0.00887	9.51397	-0.01256	9.51397	-0.01624	9.51397		0.01105	7.70729	-0.02367	7.70729	-0.03628	7.70729		0.00884	14.0161	-0.00975	14.0161	-0.01065	14.0161			0.01206	12.1212	-0.0096	12.1212	-0.00908	12.1212		0.00878	24.7915	-0.00708	24.7915	-0.00539	24.7915		0.00826	29.2451	-0.0057	29.2451	-0.00314	29.2451
	0.01424	6.77342	-0.02073	6.77342	-0.02722	6.77342		0.00888	9.49989	-0.01257	9.49989	-0.01626	9.49989		0.01107	7.72007	-0.02372	7.72007	-0.03637	7.72007		0.00886	14.023	-0.00984	14.023	-0.01082	14.023			0.01204	12.1249	-0.00961	12.1249	-0.00909	12.1249		0.0088	24.8246	-0.00711	24.8246	-0.00543	24.8246		0.00826	29.2701	-0.00571	29.2701	-0.00316	29.2701
	0.01424	6.72677	-0.02076	6.72677	-0.02728	6.72677		0.00889	9.50226	-0.0126	9.50226	-0.0163	9.50226		0.01109	7.6858	-0.02378	7.6858	-0.03647	7.6858		0.00886	14.0268	-0.00984	14.0268	-0.01082	14.0268			0.01206	12.0664	-0.00962	12.0664	-0.00909	12.0664		0.00878	24.808	-0.00713	24.808	-0.00548	24.808		0.00826	29.2279	-0.00572	29.2279	-0.00319	29.2279
	0.01429	6.77753	-0.02078	6.77753	-0.02727	6.77753		0.0089	9.57434	-0.01262	9.57434	-0.01633	9.57434		0.0111	7.66256	-0.02381	7.66256	-0.03651	7.66256		0.00887	14.0263	-0.00984	14.0263	-0.0108	14.0263			0.01208	12.0946	-0.00962	12.0946	-0.00909	12.0946		0.0088	24.7448	-0.00715	24.7448	-0.0055	24.7448		0.00826	29.246	-0.00574	29.246	-0.00322	29.246
	0.01429	6.71683	-0.02081	6.71683	-0.02733	6.71683		0.0089	9.4901	-0.01263	9.4901	-0.01637	9.4901		0.0111	7.64829	-0.02386	7.64829	-0.03662	7.64829		0.00887	13.9786	-0.00983	13.9786	-0.0108	13.9786			0.01209	12.1012	-0.00963	12.1012	-0.00909	12.1012		0.00881	24.7992	-0.00718	24.7992	-0.00555	24.7992		0.00827	29.3025	-0.00575	29.3025	-0.00324	29.3025
	0.0143	6.69069	-0.02084	6.69069	-0.02738	6.69069		0.0089	9.43662	-0.01265	9.43662	-0.01641	9.43662		0.01112	7.66777	-0.02389	7.66777	-0.03666	7.66777		0.00889	14.0053	-0.00993	14.0053	-0.01097	14.0053			0.0121	12.0779	-0.00963	12.0779	-0.00909	12.0779		0.00882	24.8376	-0.00721	24.8376	-0.0056	24.8376		0.0083	29.2082	-0.00577	29.2082	-0.00324	29.2082
	0.01434	6.73092	-0.02085	6.73092	-0.02736	6.73092		0.00893	9.4343	-0.01267	9.4343	-0.01642	9.4343		0.01114	7.63985	-0.02394	7.63985	-0.03675	7.63985		0.0089	13.9626	-0.00993	13.9626	-0.01095	13.9626			0.01213	12.0488	-0.00963	12.0488	-0.00909	12.0488		0.00883	24.8354	-0.00723	24.8354	-0.00562	24.8354		0.00833	29.2643	-0.00578	29.2643	-0.00324	29.2643
	0.01435	6.71703	-0.02088	6.71703	-0.02741	6.71703		0.00893	9.48598	-0.01269	9.48598	-0.01646	9.48598		0.01115	7.64598	-0.024	7.64598	-0.03685	7.64598		0.0089	13.9595	-0.00992	13.9595	-0.01095	13.9595			0.01215	12.0827	-0.00963	12.0827	-0.00909	12.0827		0.00884	24.7906	-0.00725	24.7906	-0.00565	24.7906		0.00833	29.2672	-0.0058	29.2672	-0.00327	29.2672
	0.01437	6.67689	-0.0209	6.67689	-0.02743	6.67689		0.00894	9.47449	-0.01272	9.47449	-0.0165	9.47449		0.01115	7.66245	-0.02403	7.66245	-0.03691	7.66245		0.00892	13.9497	-0.00992	13.9497	-0.01092	13.9497			0.01215	12.107	-0.00964	12.107	-0.00909	12.107		0.00885	24.785	-0.00727	24.785	-0.0057	24.785		0.00833	29.2539	-0.00581	29.2539	-0.00329	29.2539
	0.01437	6.69106	-0.02092	6.69106	-0.02747	6.69106		0.00896	9.45852	-0.01274	9.45852	-0.01652	9.45852		0.01118	7.65619	-0.02408	7.65619	-0.03699	7.65619		0.00891	13.982	-0.01002	13.982	-0.01113	13.982			0.01216	12.0152	-0.00964	12.0152	-0.00909	12.0152		0.00885	24.7904	-0.00729	24.7904	-0.00573	24.7904		0.00835	29.2871	-0.00582	29.2871	-0.0033	29.2871
	0.01438	6.73039	-0.02094	6.73039	-0.0275	6.73039		0.00897	9.49046	-0.01276	9.49046	-0.01654	9.49046		0.01118	7.63792	-0.02414	7.63792	-0.0371	7.63792		0.00893	13.9822	-0.01002	13.9822	-0.0111	13.9822			0.01219	12.0753	-0.00965	12.0753	-0.00909	12.0753		0.00886	24.7789	-0.00731	24.7789	-0.00576	24.7789		0.00836	29.3145	-0.00583	29.3145	-0.0033	29.3145
	0.01438	6.70142	-0.02097	6.70142	-0.02756	6.70142		0.00898	9.44621	-0.01278	9.44621	-0.01657	9.44621		0.0112	7.60106	-0.02417	7.60106	-0.03713	7.60106		0.00896	13.9717	-0.01001	13.9717	-0.01106	13.9717			0.01219	12.004	-0.00966	12.004	-0.00909	12.004		0.00887	24.781	-0.00735	24.781	-0.00583	24.781		0.00836	29.2912	-0.00585	29.2912	-0.00333	29.2912
	0.01443	6.74518	-0.02099	6.74518	-0.02755	6.74518		0.00898	9.43826	-0.0128	9.43826	-0.01662	9.43826		0.0112	7.61242	-0.02425	7.61242	-0.0373	7.61242		0.00895	13.9853	-0.01011	13.9853	-0.01127	13.9853			0.01219	12.0384	-0.00966	12.0384	-0.00911	12.0384		0.00889	24.7723	-0.00737	24.7723	-0.00585	24.7723		0.00836	29.2367	-0.00586	29.2367	-0.00336	29.2367
	0.01443	6.73726	-0.021	6.73726	-0.02757	6.73726		0.00899	9.3863	-0.01282	9.3863	-0.01664	9.3863		0.01122	7.59493	-0.02428	7.59493	-0.03734	7.59493		0.00896	13.9832	-0.01011	13.9832	-0.01125	13.9832			0.01221	11.9898	-0.00967	11.9898	-0.00909	11.9898		0.0089	24.7733	-0.00739	24.7733	-0.00587	24.7733		0.00838	29.3593	-0.00588	29.3593	-0.00337	29.3593
	0.01443	6.70462	-0.02103	6.70462	-0.02763	6.70462		0.00899	9.4272	-0.01284	9.4272	-0.01669	9.4272		0.01122	7.64859	-0.02436	7.64859	-0.0375	7.64859		0.00897	13.9517	-0.0101	13.9517	-0.01124	13.9517			0.01223	12.0436	-0.00967	12.0436	-0.0091	12.0436		0.0089	24.7107	-0.0074	24.7107	-0.00589	24.7107		0.00837	29.3352	-0.00589	29.3352	-0.00341	29.3352
	0.01446	6.69311	-0.02105	6.69311	-0.02764	6.69311		0.00902	9.46055	-0.01286	9.46055	-0.0167	9.46055		0.01124	7.6526	-0.02439	7.6526	-0.03754	7.6526		0.00899	13.9643	-0.0101	13.9643	-0.01121	13.9643			0.01226	11.9908	-0.00967	11.9908	-0.00909	11.9908		0.00893	24.6843	-0.00742	24.6843	-0.00592	24.6843		0.00839	29.3799	-0.00591	29.3799	-0.00343	29.3799
	0.01451	6.72297	-0.02107	6.72297	-0.02763	6.72297		0.00902	9.38006	-0.01289	9.38006	-0.01676	9.38006		0.01124	7.63325	-0.02444	7.63325	-0.03765	7.63325		0.00901	13.9224	-0.0102	13.9224	-0.01138	13.9224			0.01224	12.0437	-0.00967	12.0437	-0.0091	12.0437		0.00891	24.7214	-0.00744	24.7214	-0.00598	24.7214		0.0084	29.3436	-0.00592	29.3436	-0.00345	29.3436
	0.01453	6.7335	-0.0211	6.7335	-0.02767	6.7335		0.00902	9.43246	-0.01291	9.43246	-0.0168	9.43246		0.01125	7.63267	-0.0245	7.63267	-0.03775	7.63267		0.00901	13.909	-0.01019	13.909	-0.01138	13.909			0.01226	12.0942	-0.00968	12.0942	-0.00911	12.0942		0.00894	24.6975	-0.00746	24.6975	-0.00598	24.6975		0.00841	29.3128	-0.00594	29.3128	-0.00347	29.3128
	0.01451	6.69965	-0.02113	6.69965	-0.02775	6.69965		0.00904	9.48697	-0.01293	9.48697	-0.01682	9.48697		0.01128	7.61929	-0.02453	7.61929	-0.03778	7.61929		0.00903	13.9227	-0.01019	13.9227	-0.01135	13.9227			0.01228	12.0069	-0.00968	12.0069	-0.00909	12.0069		0.00895	24.7257	-0.00748	24.7257	-0.00601	24.7257		0.00843	29.3439	-0.00595	29.3439	-0.00348	29.3439
	0.01453	6.74324	-0.02114	6.74324	-0.02775	6.74324		0.00907	9.45038	-0.01295	9.45038	-0.01683	9.45038		0.01128	7.57803	-0.02461	7.57803	-0.03794	7.57803		0.00904	13.9636	-0.01029	13.9636	-0.01154	13.9636			0.0123	12.0594	-0.00969	12.0594	-0.0091	12.0594		0.00896	24.7434	-0.00751	24.7434	-0.00606	24.7434		0.00842	29.3405	-0.00597	29.3405	-0.00352	29.3405
	0.01454	6.68555	-0.02117	6.68555	-0.0278	6.68555		0.00908	9.442	-0.01297	9.442	-0.01687	9.442		0.01129	7.59471	-0.02464	7.59471	-0.03799	7.59471		0.00904	13.9357	-0.01029	13.9357	-0.01153	13.9357			0.01231	12.035	-0.00969	12.035	-0.0091	12.035		0.00897	24.7248	-0.00754	24.7248	-0.00611	24.7248		0.00841	29.3575	-0.00598	29.3575	-0.00356	29.3575
	0.01454	6.7486	-0.02119	6.7486	-0.02784	6.7486		0.00907	9.41542	-0.01299	9.41542	-0.01692	9.41542		0.01131	7.5995	-0.02472	7.5995	-0.03813	7.5995		0.00904	13.9275	-0.01028	13.9275	-0.01152	13.9275			0.0123	12.0191	-0.0097	12.0191	-0.00911	12.0191		0.00897	24.6899	-0.00756	24.6899	-0.00614	24.6899		0.00844	29.4567	-0.006	29.4567	-0.00356	29.4567
	0.01458	6.71468	-0.02121	6.71468	-0.02784	6.71468		0.00908	9.39733	-0.01302	9.39733	-0.01696	9.39733		0.01131	7.60583	-0.02472	7.60583	-0.03813	7.60583		0.00906	13.8848	-0.01038	13.8848	-0.0117	13.8848			0.01232	11.9876	-0.00971	11.9876	-0.00911	11.9876		0.00898	24.7429	-0.00759	24.7429	-0.00621	24.7429		0.00844	29.4287	-0.006	29.4287	-0.00356	29.4287
	0.01459	6.66842	-0.02123	6.66842	-0.02787	6.66842		0.00909	9.46746	-0.01305	9.46746	-0.017	9.46746		0.01133	7.59159	-0.02481	7.59159	-0.03828	7.59159		0.00907	13.8483	-0.01038	13.8483	-0.01168	13.8483			0.01235	12.047	-0.00971	12.047	-0.00911	12.047		0.00899	24.702	-0.00761	24.702	-0.00624	24.702		0.00845	29.4409	-0.00602	29.4409	-0.00358	29.4409
	0.01461	6.74119	-0.02126	6.74119	-0.02791	6.74119		0.00909	9.47595	-0.01307	9.47595	-0.01705	9.47595		0.01136	7.62157	-0.02483	7.62157	-0.03831	7.62157		0.00907	13.85	-0.01037	13.85	-0.01168	13.85			0.01235	12.0317	-0.00971	12.0317	-0.00911	12.0317		0.00901	24.7177	-0.00764	24.7177	-0.00627	24.7177		0.00845	29.4419	-0.00602	29.4419	-0.00358	29.4419
	0.01461	6.72745	-0.02128	6.72745	-0.02795	6.72745		0.00911	9.41982	-0.01309	9.41982	-0.01707	9.41982		0.01136	7.59906	-0.02489	7.59906	-0.03842	7.59906		0.00908	13.8626	-0.01037	13.8626	-0.01166	13.8626			0.01238	12.0268	-0.00971	12.0268	-0.0091	12.0268		0.00902	24.6946	-0.00767	24.6946	-0.00632	24.6946		0.00847	29.5027	-0.00603	29.5027	-0.00359	29.5027
	0.01464	6.72748	-0.0213	6.72748	-0.02796	6.72748		0.00912	9.44846	-0.01312	9.44846	-0.01711	9.44846		0.01136	7.57116	-0.02494	7.57116	-0.03853	7.57116		0.0091	13.8525	-0.01037	13.8525	-0.01163	13.8525			0.01239	12.025	-0.00971	12.025	-0.00909	12.025		0.00902	24.7058	-0.00771	24.7058	-0.0064	24.7058		0.00844	29.4951	-0.00605	29.4951	-0.00365	29.4951
	0.01464	6.72023	-0.02132	6.72023	-0.028	6.72023		0.00913	9.36158	-0.01314	9.36158	-0.01715	9.36158		0.01138	7.59033	-0.02497	7.59033	-0.03856	7.59033		0.0091	13.8364	-0.01046	13.8364	-0.01183	13.8364			0.01239	12.0084	-0.00972	12.0084	-0.00911	12.0084		0.00903	24.6812	-0.00774	24.6812	-0.00644	24.6812		0.00847	29.4062	-0.00606	29.4062	-0.00365	29.4062
	0.01466	6.72194	-0.02134	6.72194	-0.02802	6.72194		0.00913	9.41846	-0.01316	9.41846	-0.0172	9.41846		0.0114	7.61877	-0.02503	7.61877	-0.03866	7.61877		0.00912	13.7909	-0.01046	13.7909	-0.0118	13.7909			0.01241	11.9591	-0.00972	11.9591	-0.00911	11.9591		0.00904	24.6644	-0.00776	24.6644	-0.00649	24.6644		0.00848	29.4689	-0.00606	29.4689	-0.00364	29.4689
	0.01467	6.67469	-0.02136	6.67469	-0.02805	6.67469		0.00915	9.35245	-0.01319	9.35245	-0.01724	9.35245		0.0114	7.6162	-0.02508	7.6162	-0.03877	7.6162		0.00911	13.8037	-0.01046	13.8037	-0.01181	13.8037			0.01242	11.9572	-0.00973	11.9572	-0.0091	11.9572		0.00905	24.6427	-0.00779	24.6427	-0.00653	24.6427		0.00849	29.4436	-0.00607	29.4436	-0.00365	29.4436
	0.01469	6.68139	-0.02139	6.68139	-0.02809	6.68139		0.00915	9.32866	-0.01322	9.32866	-0.01729	9.32866		0.01143	7.59469	-0.02511	7.59469	-0.03879	7.59469		0.00914	13.7779	-0.01056	13.7779	-0.01197	13.7779			0.01245	12.0363	-0.00973	12.0363	-0.00909	12.0363		0.00907	24.5711	-0.0078	24.5711	-0.00653	24.5711		0.00849	29.4481	-0.00608	29.4481	-0.00368	29.4481
	0.0147	6.71037	-0.02141	6.71037	-0.02812	6.71037		0.00916	9.34135	-0.01324	9.34135	-0.01733	9.34135		0.01143	7.58406	-0.02517	7.58406	-0.0389	7.58406		0.00914	13.7748	-0.01055	13.7748	-0.01196	13.7748			0.01246	12.0037	-0.00974	12.0037	-0.00909	12.0037		0.00907	24.5856	-0.00783	24.5856	-0.00659	24.5856		0.00851	29.456	-0.0061	29.456	-0.00369	29.456
	0.0147	6.74228	-0.02143	6.74228	-0.02816	6.74228		0.00917	9.34879	-0.01327	9.34879	-0.01736	9.34879		0.01144	7.5697	-0.02522	7.5697	-0.039	7.5697		0.00915	13.757	-0.01055	13.757	-0.01195	13.757			0.01246	12.006	-0.00974	12.006	-0.0091	12.006		0.00907	24.6207	-0.00786	24.6207	-0.00665	24.6207		0.00852	29.4617	-0.00611	29.4617	-0.0037	29.4617
	0.01474	6.76621	-0.02145	6.76621	-0.02816	6.76621		0.00918	9.37187	-0.01329	9.37187	-0.0174	9.37187		0.01146	7.5501	-0.02528	7.5501	-0.0391	7.5501		0.00916	13.7262	-0.01055	13.7262	-0.01193	13.7262			0.01249	12.01	-0.00975	12.01	-0.00909	12.01		0.00909	24.6023	-0.00788	24.6023	-0.00666	24.6023		0.00854	29.4914	-0.00612	29.4914	-0.00371	29.4914
	0.01477	6.70705	-0.02147	6.70705	-0.02817	6.70705		0.00919	9.32253	-0.01331	9.32253	-0.01743	9.32253		0.01148	7.58886	-0.02533	7.58886	-0.03919	7.58886		0.00918	13.7075	-0.01064	13.7075	-0.01211	13.7075			0.0125	11.9956	-0.00975	11.9956	-0.0091	11.9956		0.00911	24.5973	-0.00791	24.5973	-0.0067	24.5973		0.00854	29.44	-0.00614	29.44	-0.00374	29.44
	0.0148	6.70233	-0.0215	6.70233	-0.0282	6.70233		0.00919	9.29594	-0.01333	9.29594	-0.01746	9.29594		0.01148	7.59615	-0.02539	7.59615	-0.0393	7.59615		0.00916	13.6979	-0.01064	13.6979	-0.01212	13.6979			0.01249	11.9564	-0.00975	11.9564	-0.00911	11.9564		0.00911	24.5543	-0.00792	24.5543	-0.00674	24.5543		0.00855	29.4502	-0.00615	29.4502	-0.00376	29.4502
	0.0148	6.73318	-0.02152	6.73318	-0.02824	6.73318		0.00921	9.31239	-0.01335	9.31239	-0.01748	9.31239		0.0115	7.57805	-0.02542	7.57805	-0.03933	7.57805		0.00919	13.6601	-0.01064	13.6601	-0.01208	13.6601			0.0125	12.0125	-0.00976	12.0125	-0.00912	12.0125		0.00911	24.5877	-0.00795	24.5877	-0.0068	24.5877		0.00856	29.4397	-0.00617	29.4397	-0.00378	29.4397
	0.0148	6.78157	-0.02154	6.78157	-0.02828	6.78157		0.00923	9.31604	-0.01337	9.31604	-0.01751	9.31604		0.0115	7.58828	-0.0255	7.58828	-0.0395	7.58828		0.0092	13.618	-0.01063	13.618	-0.01207	13.618			0.01252	11.9657	-0.00976	11.9657	-0.00912	11.9657		0.00912	24.5634	-0.00798	24.5634	-0.00684	24.5634		0.00856	29.4671	-0.00617	29.4671	-0.00378	29.4671
	0.01482	6.70386	-0.02156	6.70386	-0.0283	6.70386		0.00925	9.30397	-0.0134	9.30397	-0.01755	9.30397		0.01153	7.57518	-0.02556	7.57518	-0.03958	7.57518		0.00921	13.601	-0.01073	13.601	-0.01225	13.601			0.01256	12.009	-0.00977	12.009	-0.00911	12.009		0.00913	24.5757	-0.008	24.5757	-0.00687	24.5757		0.00857	29.4648	-0.00618	29.4648	-0.0038	29.4648
	0.01483	6.71967	-0.02158	6.71967	-0.02833	6.71967		0.00925	9.26929	-0.01342	9.26929	-0.01759	9.26929		0.01154	7.60605	-0.02569	7.60605	-0.03985	7.60605		0.00923	13.1777	-0.01073	13.1777	-0.01223	13.1777			0.01257	12.0071	-0.00978	12.0071	-0.00911	12.0071		0.00915	24.6369	-0.00803	24.6369	-0.00691	24.6369		0.00857	29.4722	-0.0062	29.4722	-0.00383	29.4722
	0.01485	6.63253	-0.02161	6.63253	-0.02837	6.63253		0.00925	9.25787	-0.01344	9.25787	-0.01763	9.25787		0.01155	7.59144	-0.02583	7.59144	-0.04012	7.59144		0.00922	13.0727	-0.01073	13.0727	-0.01223	13.0727			0.01257	11.9547	-0.00978	11.9547	-0.00912	11.9547		0.00915	24.6266	-0.00805	24.6266	-0.00694	24.6266		0.00857	29.4943	-0.00621	29.4943	-0.00385	29.4943
	0.01491	6.6417	-0.02164	6.6417	-0.02837	6.6417		0.00926	9.2727	-0.01346	9.2727	-0.01766	9.2727		0.01156	7.59399	-0.02592	7.59399	-0.04027	7.59399		0.00924	13.0221	-0.01082	13.0221	-0.0124	13.0221			0.0126	11.9789	-0.00979	11.9789	-0.00911	11.9789		0.00916	24.6244	-0.00808	24.6244	-0.00699	24.6244		0.00859	29.4962	-0.00622	29.4962	-0.00386	29.4962
	0.01493	6.68042	-0.02166	6.68042	-0.02839	6.68042		0.00927	9.27578	-0.01348	9.27578	-0.0177	9.27578		0.01158	7.60083	-0.026	7.60083	-0.04042	7.60083		0.00924	12.9309	-0.01082	12.9309	-0.0124	12.9309			0.0126	11.9763	-0.00979	11.9763	-0.00912	11.9763		0.00918	24.6021	-0.00809	24.6021	-0.00701	24.6021		0.0086	29.4916	-0.00624	29.4916	-0.00388	29.4916
	0.01488	6.72712	-0.02168	6.72712	-0.02848	6.72712		0.00928	9.29565	-0.01351	9.29565	-0.01773	9.29565		0.01159	7.60616	-0.02606	7.60616	-0.04052	7.60616		0.00925	12.8901	-0.01082	12.8901	-0.01238	12.8901			0.0126	11.9044	-0.00979	11.9044	-0.00912	11.9044		0.00919	24.6012	-0.00811	24.6012	-0.00704	24.6012		0.0086	29.4904	-0.00625	29.4904	-0.00389	29.4904
	0.01491	6.70985	-0.0217	6.70985	-0.02849	6.70985		0.00932	9.31356	-0.01353	9.31356	-0.01773	9.31356		0.0116	7.61657	-0.02611	7.61657	-0.04062	7.61657		0.00927	12.8255	-0.01081	12.8255	-0.01236	12.8255			0.01264	11.9312	-0.0098	11.9312	-0.00911	11.9312		0.00919	24.6227	-0.00814	24.6227	-0.00709	24.6227		0.00861	29.478	-0.00627	29.478	-0.00393	29.478
	0.01493	6.70724	-0.02172	6.70724	-0.02851	6.70724		0.00933	9.24482	-0.01355	9.24482	-0.01776	9.24482		0.0116	7.58978	-0.02614	7.58978	-0.04068	7.58978		0.00928	12.7909	-0.01091	12.7909	-0.01254	12.7909			0.01263	11.9101	-0.0098	11.9101	-0.00912	11.9101		0.0092	24.5946	-0.00817	24.5946	-0.00714	24.5946		0.00862	29.5008	-0.00628	29.5008	-0.00395	29.5008
	0.01494	6.65785	-0.02174	6.65785	-0.02854	6.65785		0.0093	9.24478	-0.01357	9.24478	-0.01783	9.24478		0.01163	7.59173	-0.02622	7.59173	-0.04081	7.59173		0.00928	12.7598	-0.01091	12.7598	-0.01253	12.7598			0.01265	11.9232	-0.00981	11.9232	-0.00912	11.9232		0.00921	24.5987	-0.0082	24.5987	-0.00719	24.5987		0.00862	29.4704	-0.0063	29.4704	-0.00398	29.4704
	0.01498	6.6559	-0.02176	6.6559	-0.02854	6.6559		0.00932	9.23528	-0.01359	9.23528	-0.01786	9.23528		0.01164	7.58728	-0.02625	7.58728	-0.04086	7.58728		0.00931	12.7464	-0.0109	12.7464	-0.0125	12.7464			0.01265	11.9237	-0.00982	11.9237	-0.00913	11.9237		0.00923	24.5958	-0.00823	24.5958	-0.00722	24.5958		0.00863	29.4986	-0.00632	29.4986	-0.004	29.4986
	0.01498	6.60147	-0.02178	6.60147	-0.02858	6.60147		0.00933	9.24117	-0.01362	9.24117	-0.0179	9.24117		0.01164	7.59804	-0.02633	7.59804	-0.04103	7.59804		0.00931	12.7387	-0.0109	12.7387	-0.01249	12.7387			0.01269	11.879	-0.00982	11.879	-0.00912	11.879		0.00924	24.5352	-0.00824	24.5352	-0.00723	24.5352		0.00863	29.47	-0.00633	29.47	-0.00403	29.47
	0.01502	6.61549	-0.0218	6.61549	-0.02858	6.61549		0.00934	9.22786	-0.01364	9.22786	-0.01795	9.22786		0.01165	7.56994	-0.02636	7.56994	-0.04107	7.56994		0.00932	12.6801	-0.011	12.6801	-0.01268	12.6801			0.01267	11.9028	-0.00983	11.9028	-0.00914	11.9028		0.00924	24.5528	-0.00826	24.5528	-0.00729	24.5528		0.00865	29.492	-0.00635	29.492	-0.00406	29.492
	0.01502	6.69376	-0.02183	6.69376	-0.02864	6.69376		0.00936	9.20579	-0.01366	9.20579	-0.01797	9.20579		0.01166	7.59724	-0.02642	7.59724	-0.04117	7.59724		0.00932	12.6678	-0.011	12.6678	-0.01267	12.6678			0.01271	11.8887	-0.00983	11.8887	-0.00913	11.8887		0.00925	24.5892	-0.00828	24.5892	-0.00732	24.5892		0.00865	29.4751	-0.00634	29.4751	-0.00403	29.4751
	0.01504	6.74119	-0.02185	6.74119	-0.02866	6.74119		0.00936	9.26598	-0.01368	9.26598	-0.01801	9.26598		0.01166	7.59824	-0.02647	7.59824	-0.04128	7.59824		0.00933	12.6486	-0.01099	12.6486	-0.01265	12.6486			0.01269	11.8502	-0.00983	11.8502	-0.00914	11.8502		0.00927	24.5208	-0.00831	24.5208	-0.00735	24.5208		0.00866	29.4343	-0.00636	29.4343	-0.00406	29.4343
	0.01504	6.6968	-0.02186	6.6968	-0.02868	6.6968		0.00939	9.20572	-0.01371	9.20572	-0.01803	9.20572		0.01169	7.6269	-0.02653	7.6269	-0.04137	7.6269		0.00934	12.6321	-0.01099	12.6321	-0.01264	12.6321			0.01274	11.8871	-0.00983	11.8871	-0.00913	11.8871		0.00927	24.5526	-0.00833	24.5526	-0.00739	24.5526		0.00868	29.4735	-0.00636	29.4735	-0.00404	29.4735
	0.01502	6.70343	-0.02188	6.70343	-0.02874	6.70343		0.00939	9.22797	-0.01373	9.22797	-0.01807	9.22797		0.01169	7.58877	-0.02656	7.58877	-0.04142	7.58877		0.00936	12.5763	-0.01109	12.5763	-0.01281	12.5763			0.01272	11.8773	-0.00984	11.8773	-0.00914	11.8773		0.00928	24.5663	-0.00836	24.5663	-0.00744	24.5663		0.00868	29.4718	-0.00638	29.4718	-0.00407	29.4718
	0.01506	6.64495	-0.02191	6.64495	-0.02876	6.64495		0.0094	9.17409	-0.01376	9.17409	-0.01811	9.17409		0.0117	7.61192	-0.02661	7.61192	-0.04152	7.61192		0.00935	12.5723	-0.01108	12.5723	-0.01282	12.5723			0.01276	11.859	-0.00984	11.859	-0.00912	11.859		0.0093	24.5528	-0.00838	24.5528	-0.00745	24.5528		0.00868	29.4708	-0.00638	29.4708	-0.00409	29.4708
	0.0151	6.6382	-0.02194	6.6382	-0.02878	6.6382		0.0094	9.14859	-0.01378	9.14859	-0.01815	9.14859		0.01172	7.63335	-0.02667	7.63335	-0.04161	7.63335		0.00936	12.5882	-0.01108	12.5882	-0.0128	12.5882			0.01276	11.9193	-0.00985	11.9193	-0.00913	11.9193		0.00929	24.5479	-0.0084	24.5479	-0.0075	24.5479		0.00868	29.5116	-0.0064	29.5116	-0.00412	29.5116
	0.0151	6.63211	-0.02196	6.63211	-0.02882	6.63211		0.00939	9.07106	-0.0138	9.07106	-0.01821	9.07106		0.01174	7.60838	-0.02672	7.60838	-0.0417	7.60838		0.00938	12.6141	-0.01108	12.6141	-0.01277	12.6141			0.01276	11.8533	-0.00985	11.8533	-0.00914	11.8533		0.00931	24.5598	-0.00842	24.5598	-0.00754	24.5598		0.0087	29.4901	-0.00641	29.4901	-0.00412	29.4901
	0.01512	6.6325	-0.02198	6.6325	-0.02884	6.6325		0.00941	9.06235	-0.01383	9.06235	-0.01824	9.06235		0.01175	7.61885	-0.02681	7.61885	-0.04186	7.61885		0.0094	12.5829	-0.01117	12.5829	-0.01295	12.5829			0.0128	11.9133	-0.00986	11.9133	-0.00913	11.9133		0.00932	24.5434	-0.00844	24.5434	-0.00757	24.5434		0.00872	29.447	-0.00642	29.447	-0.00413	29.447
	0.01512	6.61372	-0.02201	6.61372	-0.0289	6.61372		0.00944	9.08665	-0.01385	9.08665	-0.01826	9.08665		0.01177	7.60936	-0.02686	7.60936	-0.04195	7.60936		0.0094	12.5271	-0.01117	12.5271	-0.01294	12.5271			0.01278	11.8294	-0.00987	11.8294	-0.00915	11.8294		0.00933	24.5316	-0.00847	24.5316	-0.00761	24.5316		0.00872	29.4693	-0.00643	29.4693	-0.00414	29.4693
	0.01514	6.65342	-0.02202	6.65342	-0.0289	6.65342		0.00944	9.11322	-0.01387	9.11322	-0.0183	9.11322		0.01177	7.61045	-0.02689	7.61045	-0.04201	7.61045		0.00941	12.5095	-0.01117	12.5095	-0.01293	12.5095			0.0128	11.8275	-0.00987	11.8275	-0.00914	11.8275		0.00934	24.5363	-0.00849	24.5363	-0.00764	24.5363		0.00872	29.4582	-0.00645	29.4582	-0.00419	29.4582
	0.01517	6.71037	-0.02205	6.71037	-0.02893	6.71037		0.00945	9.09419	-0.01389	9.09419	-0.01834	9.09419		0.0118	7.61017	-0.02694	7.61017	-0.04209	7.61017		0.00943	12.4732	-0.01117	12.4732	-0.0129	12.4732			0.01283	11.8788	-0.00987	11.8788	-0.00914	11.8788		0.00936	24.5188	-0.00851	24.5188	-0.00766	24.5188		0.00874	29.5129	-0.00647	29.5129	-0.0042	29.5129
	0.01517	6.64695	-0.02207	6.64695	-0.02897	6.64695		0.00945	9.07712	-0.01392	9.07712	-0.01839	9.07712		0.0118	7.58922	-0.027	7.58922	-0.0422	7.58922		0.00944	12.4939	-0.01126	12.4939	-0.01308	12.4939			0.01285	11.9031	-0.00987	11.9031	-0.00914	11.9031		0.00935	24.4534	-0.00853	24.4534	-0.00771	24.4534		0.00874	29.4926	-0.00648	29.4926	-0.00423	29.4926
	0.01522	6.64252	-0.02209	6.64252	-0.02896	6.64252		0.00946	9.07572	-0.01394	9.07572	-0.01842	9.07572		0.0118	7.59273	-0.02706	7.59273	-0.04231	7.59273		0.00944	12.4562	-0.01126	12.4562	-0.01308	12.4562			0.01286	11.8851	-0.00988	11.8851	-0.00914	11.8851		0.00937	24.4905	-0.00856	24.4905	-0.00774	24.4905		0.00875	29.479	-0.00649	29.479	-0.00423	29.479
	0.01522	6.61901	-0.02211	6.61901	-0.029	6.61901		0.00948	8.9819	-0.01396	8.9819	-0.01844	8.9819		0.01184	7.61188	-0.02708	7.61188	-0.04233	7.61188		0.00945	12.3808	-0.01126	12.3808	-0.01306	12.3808			0.01287	11.8178	-0.00989	11.8178	-0.00914	11.8178		0.00937	24.5421	-0.00858	24.5421	-0.00778	24.5421		0.00878	29.5066	-0.00651	29.5066	-0.00424	29.5066
	0.01522	6.65287	-0.02214	6.65287	-0.02906	6.65287		0.00948	8.92095	-0.01398	8.92095	-0.01849	8.92095		0.01184	7.60941	-0.02717	7.60941	-0.04249	7.60941		0.00945	12.455	-0.01125	12.455	-0.01306	12.455			0.01286	11.7744	-0.00989	11.7744	-0.00915	11.7744		0.00941	24.5306	-0.00859	24.5306	-0.00778	24.5306		0.00876	29.5076	-0.00653	29.5076	-0.0043	29.5076
	0.01525	6.63241	-0.02216	6.63241	-0.02907	6.63241		0.00951	9.03987	-0.01401	9.03987	-0.01851	9.03987		0.01185	7.59948	-0.02719	7.59948	-0.04254	7.59948		0.00946	12.4352	-0.01135	12.4352	-0.01324	12.4352			0.0129	11.8642	-0.0099	11.8642	-0.00915	11.8642		0.00939	24.5308	-0.00861	24.5308	-0.00784	24.5308		0.00877	29.4696	-0.00654	29.4696	-0.00431	29.4696
	0.01525	6.64856	-0.02217	6.64856	-0.02909	6.64856		0.00951	8.93564	-0.01404	8.93564	-0.01856	8.93564		0.01185	7.59525	-0.02728	7.59525	-0.04271	7.59525		0.00948	12.3857	-0.01135	12.3857	-0.01321	12.3857			0.01293	11.8354	-0.0099	11.8354	-0.00915	11.8354		0.00941	24.5351	-0.00863	24.5351	-0.00785	24.5351		0.00878	29.483	-0.00655	29.483	-0.00431	29.483
	0.01526	6.6417	-0.0222	6.6417	-0.02914	6.6417		0.00951	8.9664	-0.01406	8.9664	-0.0186	8.9664		0.01186	7.57411	-0.02733	7.57411	-0.04281	7.57411		0.00948	12.3615	-0.01134	12.3615	-0.01321	12.3615			0.01291	11.8982	-0.00991	11.8982	-0.00916	11.8982		0.00942	24.4946	-0.00866	24.4946	-0.0079	24.4946		0.00878	29.4521	-0.00656	29.4521	-0.00434	29.4521
	0.0153	6.59958	-0.02222	6.59958	-0.02914	6.59958		0.00953	8.99481	-0.01408	8.99481	-0.01862	8.99481		0.01187	7.59379	-0.02736	7.59379	-0.04285	7.59379		0.0095	12.3522	-0.01134	12.3522	-0.01318	12.3522			0.01293	11.7855	-0.00991	11.7855	-0.00916	11.7855		0.00944	24.4949	-0.00868	24.4949	-0.00792	24.4949		0.0088	29.4693	-0.00658	29.4693	-0.00437	29.4693
	0.01528	6.6139	-0.02224	6.6139	-0.0292	6.6139		0.00953	8.94879	-0.0141	8.94879	-0.01866	8.94879		0.0119	7.62275	-0.02744	7.62275	-0.04299	7.62275		0.00951	12.3651	-0.01144	12.3651	-0.01337	12.3651			0.01296	11.7624	-0.00992	11.7624	-0.00916	11.7624		0.00944	24.4929	-0.00871	24.4929	-0.00798	24.4929		0.0088	29.4912	-0.0066	29.4912	-0.0044	29.4912
	0.0153	6.61744	-0.02226	6.61744	-0.02922	6.61744		0.00954	8.90694	-0.01412	8.90694	-0.0187	8.90694		0.01191	7.60594	-0.02747	7.60594	-0.04303	7.60594		0.00952	12.3285	-0.01144	12.3285	-0.01335	12.3285			0.01296	11.7894	-0.00993	11.7894	-0.00917	11.7894		0.00945	24.5059	-0.00873	24.5059	-0.008	24.5059		0.00881	29.5181	-0.00661	29.5181	-0.00441	29.5181
	0.0153	6.65529	-0.02229	6.65529	-0.02928	6.65529		0.00956	8.90065	-0.01414	8.90065	-0.01873	8.90065		0.01191	7.59387	-0.02753	7.59387	-0.04315	7.59387		0.00954	12.3206	-0.01143	12.3206	-0.01332	12.3206			0.01298	11.8006	-0.00994	11.8006	-0.00917	11.8006		0.00945	24.468	-0.00875	24.468	-0.00804	24.468		0.00881	29.4764	-0.00663	29.4764	-0.00445	29.4764
	0.01536	6.62388	-0.0223	6.62388	-0.02924	6.62388		0.00955	8.87963	-0.01417	8.87963	-0.01879	8.87963		0.01191	7.56657	-0.02756	7.56657	-0.0432	7.56657		0.00953	12.2873	-0.01143	12.2873	-0.01333	12.2873			0.01298	11.8061	-0.00994	11.8061	-0.00918	11.8061		0.00945	24.5083	-0.00876	24.5083	-0.00808	24.5083		0.00883	29.5251	-0.00665	29.5251	-0.00446	29.5251
	0.01538	6.62808	-0.02232	6.62808	-0.02926	6.62808		0.00956	8.91998	-0.01419	8.91998	-0.01882	8.91998		0.01195	7.56538	-0.02761	7.56538	-0.04327	7.56538		0.00954	12.2334	-0.01153	12.2334	-0.01351	12.2334			0.013	11.7887	-0.00994	11.7887	-0.00918	11.7887		0.00946	24.4651	-0.00879	24.4651	-0.00812	24.4651		0.00883	29.5026	-0.00666	29.5026	-0.00449	29.5026
	0.01541	6.668	-0.02235	6.668	-0.02929	6.668		0.00956	8.86573	-0.01421	8.86573	-0.01886	8.86573		0.01196	7.55613	-0.02767	7.55613	-0.04337	7.55613		0.00955	12.2442	-0.01152	12.2442	-0.0135	12.2442			0.01304	11.7756	-0.00995	11.7756	-0.00917	11.7756		0.00949	24.5198	-0.00881	24.5198	-0.00813	24.5198		0.00883	29.5458	-0.00668	29.5458	-0.00454	29.5458
	0.01539	6.67405	-0.02237	6.67405	-0.02935	6.67405		0.0096	8.84906	-0.01423	8.84906	-0.01886	8.84906		0.01196	7.53861	-0.02772	7.53861	-0.04348	7.53861		0.00955	12.2458	-0.01152	12.2458	-0.01349	12.2458			0.01301	11.8301	-0.00995	11.8301	-0.00919	11.8301		0.0095	24.5035	-0.00884	24.5035	-0.00818	24.5035		0.00885	29.5111	-0.0067	29.5111	-0.00455	29.5111
	0.01541	6.6643	-0.02239	6.6643	-0.02937	6.6643		0.00961	8.88632	-0.01425	8.88632	-0.01889	8.88632		0.01196	7.52294	-0.02775	7.52294	-0.04354	7.52294		0.00957	12.2249	-0.01152	12.2249	-0.01346	12.2249			0.01305	11.7905	-0.00996	11.7905	-0.00918	11.7905		0.0095	24.5362	-0.00887	24.5362	-0.00824	24.5362		0.00886	29.489	-0.00672	29.489	-0.00457	29.489
	0.01541	6.63878	-0.02241	6.63878	-0.02941	6.63878		0.00963	8.82953	-0.01428	8.82953	-0.01892	8.82953		0.012	7.55383	-0.02781	7.55383	-0.04361	7.55383		0.00958	12.2267	-0.01161	12.2267	-0.01365	12.2267			0.01305	11.8102	-0.00997	11.8102	-0.00918	11.8102		0.00951	24.5041	-0.00888	24.5041	-0.00824	24.5041		0.00885	29.4903	-0.00673	29.4903	-0.00461	29.4903
	0.01544	6.61178	-0.02244	6.61178	-0.02944	6.61178		0.00962	8.82279	-0.0143	8.82279	-0.01897	8.82279		0.01199	7.5782	-0.02783	7.5782	-0.04368	7.5782		0.00959	12.1958	-0.01161	12.1958	-0.01363	12.1958			0.01307	11.7985	-0.00998	11.7985	-0.00919	11.7985		0.00953	24.4924	-0.00891	24.4924	-0.00828	24.4924		0.00886	29.5108	-0.00675	29.5108	-0.00463	29.5108
	0.01546	6.62841	-0.02246	6.62841	-0.02946	6.62841		0.00963	8.78382	-0.01431	8.78382	-0.01899	8.78382		0.01201	7.53372	-0.02792	7.53372	-0.04382	7.53372		0.0096	12.1718	-0.01161	12.1718	-0.01362	12.1718			0.01309	11.8058	-0.00998	11.8058	-0.00919	11.8058		0.00954	24.4978	-0.00892	24.4978	-0.00831	24.4978		0.00889	29.5113	-0.00677	29.5113	-0.00465	29.5113
	0.01547	6.65237	-0.02248	6.65237	-0.02949	6.65237		0.00963	8.80091	-0.01433	8.80091	-0.01903	8.80091		0.01202	7.53523	-0.02794	7.53523	-0.04387	7.53523		0.00962	12.1947	-0.01161	12.1947	-0.01359	12.1947			0.01308	11.7667	-0.00998	11.7667	-0.0092	11.7667		0.00954	24.542	-0.00895	24.542	-0.00837	24.542		0.00888	29.5494	-0.00678	29.5494	-0.00467	29.5494
	0.01549	6.59273	-0.0225	6.59273	-0.02951	6.59273		0.00965	8.79325	-0.01436	8.79325	-0.01906	8.79325		0.01202	7.53151	-0.028	7.53151	-0.04398	7.53151		0.00962	12.2038	-0.0117	12.2038	-0.01378	12.2038			0.01311	11.7621	-0.00999	11.7621	-0.0092	11.7621		0.00955	24.5162	-0.00897	24.5162	-0.00839	24.5162		0.00889	29.5327	-0.00679	29.5327	-0.00469	29.5327
	0.0155	6.66879	-0.02253	6.66879	-0.02956	6.66879		0.00966	8.75945	-0.01437	8.75945	-0.01908	8.75945		0.01205	7.54269	-0.02806	7.54269	-0.04406	7.54269		0.00962	12.2099	-0.0117	12.2099	-0.01378	12.2099			0.01312	11.7399	-0.00999	11.7399	-0.0092	11.7399		0.00956	24.5505	-0.009	24.5505	-0.00844	24.5505		0.0089	29.5502	-0.00681	29.5502	-0.00472	29.5502
	0.01552	6.6549	-0.02255	6.6549	-0.02958	6.6549		0.00967	8.83361	-0.01439	8.83361	-0.01912	8.83361		0.01206	7.50018	-0.02814	7.50018	-0.04422	7.50018		0.00965	12.2178	-0.0117	12.2178	-0.01374	12.2178			0.01313	11.7784	-0.01	11.7784	-0.00921	11.7784		0.00955	24.498	-0.00902	24.498	-0.00849	24.498		0.00891	29.5273	-0.00683	29.5273	-0.00475	29.5273
	0.01554	6.60707	-0.02257	6.60707	-0.0296	6.60707		0.00968	8.79128	-0.01441	8.79128	-0.01914	8.79128		0.01206	7.53175	-0.02819	7.53175	-0.04433	7.53175		0.00966	12.1437	-0.01169	12.1437	-0.01373	12.1437			0.01311	11.7826	-0.01	11.7826	-0.00922	11.7826		0.00958	24.5286	-0.00904	24.5286	-0.0085	24.5286		0.00891	29.5749	-0.00684	29.5749	-0.00477	29.5749
	0.01555	6.62388	-0.02259	6.62388	-0.02963	6.62388		0.00969	8.77901	-0.01443	8.77901	-0.01917	8.77901		0.0121	7.50163	-0.02825	7.50163	-0.0444	7.50163		0.00967	12.1857	-0.01169	12.1857	-0.01371	12.1857			0.01315	11.7552	-0.01	11.7552	-0.00922	11.7552		0.00959	24.5223	-0.00908	24.5223	-0.00856	24.5223		0.00891	29.6061	-0.00686	29.6061	-0.00481	29.6061
	0.01557	6.62294	-0.02262	6.62294	-0.02967	6.62294		0.0097	8.79445	-0.01444	8.79445	-0.01919	8.79445		0.01208	7.51553	-0.02831	7.51553	-0.04453	7.51553		0.00967	12.1609	-0.01179	12.1609	-0.0139	12.1609			0.01318	11.7628	-0.01	11.7628	-0.00922	11.7628		0.00958	24.5383	-0.00909	24.5383	-0.00861	24.5383		0.00891	29.6128	-0.00688	29.6128	-0.00484	29.6128
	0.01558	6.64206	-0.02264	6.64206	-0.0297	6.64206		0.00971	8.82722	-0.01446	8.82722	-0.01921	8.82722		0.01211	7.50372	-0.02836	7.50372	-0.04461	7.50372		0.00968	12.1452	-0.01178	12.1452	-0.01389	12.1452			0.01318	11.7698	-0.01	11.7698	-0.00922	11.7698		0.00959	24.5713	-0.00912	24.5713	-0.00866	24.5713		0.00894	29.5823	-0.00688	29.5823	-0.00483	29.5823
	0.01563	6.61978	-0.02267	6.61978	-0.02971	6.61978		0.00972	8.81092	-0.01448	8.81092	-0.01924	8.81092		0.01211	7.48303	-0.02839	7.48303	-0.04467	7.48303		0.00968	12.1283	-0.01178	12.1283	-0.01388	12.1283			0.0132	11.7633	-0.01	11.7633	-0.00922	11.7633		0.00962	24.5089	-0.00915	24.5089	-0.00868	24.5089		0.00895	29.6394	-0.0069	29.6394	-0.00485	29.6394
	0.01562	6.6281	-0.02269	6.6281	-0.02976	6.6281		0.00973	8.78954	-0.0145	8.78954	-0.01927	8.78954		0.01215	7.49647	-0.02847	7.49647	-0.04479	7.49647		0.0097	12.1137	-0.01188	12.1137	-0.01406	12.1137			0.0132	11.7982	-0.01	11.7982	-0.00924	11.7982		0.00962	24.538	-0.00918	24.538	-0.00874	24.538		0.00896	29.6182	-0.00692	29.6182	-0.00487	29.6182
	0.01562	6.658	-0.0227	6.658	-0.02978	6.658		0.00974	8.81501	-0.01452	8.81501	-0.0193	8.81501		0.01215	7.5239	-0.0285	7.5239	-0.04485	7.5239		0.0097	12.0671	-0.01188	12.0671	-0.01405	12.0671			0.01323	11.8355	-0.01	11.8355	-0.00922	11.8355		0.00964	24.5064	-0.0092	24.5064	-0.00876	24.5064		0.00896	29.5876	-0.00694	29.5876	-0.00492	29.5876
	0.01565	6.64764	-0.02273	6.64764	-0.02981	6.64764		0.00977	8.75528	-0.01454	8.75528	-0.01931	8.75528		0.01215	7.48625	-0.02853	7.48625	-0.04491	7.48625		0.00972	12.0561	-0.01187	12.0561	-0.01402	12.0561			0.01322	11.7968	-0.0101	11.7968	-0.00924	11.7968		0.00965	24.5119	-0.00923	24.5119	-0.0088	24.5119		0.00898	29.5556	-0.00695	29.5556	-0.00493	29.5556
	0.01566	6.67891	-0.02275	6.67891	-0.02984	6.67891		0.00976	8.75452	-0.01457	8.75452	-0.01937	8.75452		0.01216	7.49113	-0.02858	7.49113	-0.04501	7.49113		0.00972	12.0672	-0.01187	12.0672	-0.01402	12.0672			0.01326	11.8187	-0.0101	11.8187	-0.00924	11.8187		0.00966	24.5246	-0.00925	24.5246	-0.00885	24.5246		0.00899	29.5191	-0.00697	29.5191	-0.00495	29.5191
	0.01566	6.66517	-0.02277	6.66517	-0.02988	6.66517		0.00976	8.80083	-0.01459	8.80083	-0.01942	8.80083		0.01218	7.48428	-0.02867	7.48428	-0.04515	7.48428		0.00975	12.0755	-0.01187	12.0755	-0.01398	12.0755			0.01327	11.7625	-0.0101	11.7625	-0.00924	11.7625		0.00966	24.5568	-0.00928	24.5568	-0.00891	24.5568		0.00898	29.5384	-0.00698	29.5384	-0.00499	29.5384
	0.0157	6.59083	-0.0228	6.59083	-0.0299	6.59083		0.00978	8.7687	-0.01461	8.7687	-0.01944	8.7687		0.0122	7.47417	-0.02869	7.47417	-0.04519	7.47417		0.00975	12.0224	-0.01196	12.0224	-0.01418	12.0224			0.01326	11.7675	-0.0101	11.7675	-0.00925	11.7675		0.00967	24.5527	-0.00931	24.5527	-0.00895	24.5527		0.00899	29.5389	-0.007	29.5389	-0.00501	29.5389
	0.01571	6.58764	-0.02282	6.58764	-0.02993	6.58764		0.00979	8.6969	-0.01464	8.6969	-0.01949	8.6969		0.01221	7.49495	-0.02875	7.49495	-0.04529	7.49495		0.00977	12.0122	-0.01196	12.0122	-0.01415	12.0122			0.01329	11.7341	-0.0101	11.7341	-0.00925	11.7341		0.00968	24.5552	-0.00933	24.5552	-0.00898	24.5552		0.00899	29.5518	-0.00702	29.5518	-0.00504	29.5518
	0.0157	6.68416	-0.02284	6.68416	-0.02998	6.68416		0.00979	8.71463	-0.01466	8.71463	-0.01954	8.71463		0.01222	7.44797	-0.02878	7.44797	-0.04534	7.44797		0.00976	12.0256	-0.01196	12.0256	-0.01415	12.0256			0.01329	11.7684	-0.0101	11.7684	-0.00925	11.7684		0.0097	24.5409	-0.00936	24.5409	-0.00902	24.5409		0.00901	29.5357	-0.00703	29.5357	-0.00505	29.5357
	0.01571	6.61123	-0.02287	6.61123	-0.03003	6.61123		0.00981	8.74806	-0.01468	8.74806	-0.01955	8.74806		0.01223	7.43531	-0.02883	7.43531	-0.04544	7.43531		0.00977	12.0145	-0.01195	12.0145	-0.01414	12.0145			0.01333	11.7829	-0.0101	11.7829	-0.00925	11.7829		0.00971	24.5248	-0.00938	24.5248	-0.00904	24.5248		0.00902	29.5	-0.00705	29.5	-0.00507	29.5
	0.01571	6.63999	-0.02289	6.63999	-0.03007	6.63999		0.00982	8.65883	-0.0147	8.65883	-0.01959	8.65883		0.01225	7.45411	-0.02889	7.45411	-0.04553	7.45411		0.00979	12.0545	-0.01205	12.0545	-0.01431	12.0545			0.01334	11.6859	-0.0101	11.6859	-0.00925	11.6859		0.00972	24.5367	-0.00941	24.5367	-0.00909	24.5367		0.00902	29.5406	-0.00706	29.5406	-0.0051	29.5406
	0.01576	6.63592	-0.02291	6.63592	-0.03006	6.63592		0.00981	8.72982	-0.01473	8.72982	-0.01965	8.72982		0.01227	7.45761	-0.02894	7.45761	-0.04562	7.45761		0.00979	12.0027	-0.01205	12.0027	-0.01431	12.0027			0.01334	11.7515	-0.0101	11.7515	-0.00926	11.7515		0.00972	24.5331	-0.00943	24.5331	-0.00915	24.5331		0.00902	29.5359	-0.00708	29.5359	-0.00515	29.5359
	0.01579	6.65225	-0.02294	6.65225	-0.03009	6.65225		0.00982	8.69304	-0.01475	8.69304	-0.01968	8.69304		0.01227	7.45555	-0.029	7.45555	-0.04573	7.45555		0.0098	12.0092	-0.01205	12.0092	-0.01429	12.0092			0.01334	11.7667	-0.0101	11.7667	-0.00928	11.7667		0.00972	24.5212	-0.00945	24.5212	-0.00919	24.5212		0.00903	29.5839	-0.0071	29.5839	-0.00517	29.5839
	0.01582	6.5777	-0.02295	6.5777	-0.03008	6.5777		0.00982	8.63677	-0.01477	8.63677	-0.01972	8.63677		0.01227	7.44763	-0.02906	7.44763	-0.04584	7.44763		0.00982	11.9805	-0.01214	11.9805	-0.01446	11.9805			0.01337	11.7485	-0.0101	11.7485	-0.00927	11.7485		0.00974	24.5576	-0.00948	24.5576	-0.00922	24.5576		0.00905	29.6308	-0.00712	29.6308	-0.0052	29.6308
	0.01584	6.56751	-0.02298	6.56751	-0.03012	6.56751		0.00985	8.66118	-0.0148	8.66118	-0.01974	8.66118		0.01231	7.44284	-0.02911	7.44284	-0.04591	7.44284		0.00983	11.9879	-0.01214	11.9879	-0.01445	11.9879			0.01337	11.7247	-0.0101	11.7247	-0.00928	11.7247		0.00975	24.5208	-0.00951	24.5208	-0.00927	24.5208		0.00905	29.517	-0.00714	29.517	-0.00523	29.517
	0.01582	6.58814	-0.023	6.58814	-0.03018	6.58814		0.00987	8.66098	-0.01482	8.66098	-0.01976	8.66098		0.01231	7.43128	-0.02919	7.43128	-0.04608	7.43128		0.00983	11.9884	-0.01214	11.9884	-0.01444	11.9884			0.0134	11.7652	-0.0101	11.7652	-0.00928	11.7652		0.00976	24.5794	-0.00953	24.5794	-0.0093	24.5794		0.00907	29.5947	-0.00716	29.5947	-0.00525	29.5947
	0.01586	6.60056	-0.02303	6.60056	-0.0302	6.60056		0.00989	8.67798	-0.01484	8.67798	-0.01978	8.67798		0.01231	7.41864	-0.02922	7.41864	-0.04613	7.41864		0.00985	11.9555	-0.01213	11.9555	-0.01442	11.9555			0.01341	11.7956	-0.0101	11.7956	-0.00928	11.7956		0.00977	24.5438	-0.00956	24.5438	-0.00934	24.5438		0.00907	29.5875	-0.00718	29.5875	-0.00528	29.5875
	0.01586	6.54623	-0.02305	6.54623	-0.03024	6.54623		0.0099	8.6616	-0.01486	8.6616	-0.01982	8.6616		0.01232	7.41185	-0.02928	7.41185	-0.04624	7.41185		0.00984	11.9495	-0.01213	11.9495	-0.01442	11.9495			0.01342	11.7591	-0.0101	11.7591	-0.00928	11.7591		0.00979	24.5319	-0.00958	24.5319	-0.00936	24.5319		0.00907	29.5875	-0.0072	29.5875	-0.00533	29.5875
	0.01587	6.55633	-0.02306	6.55633	-0.03025	6.55633		0.00989	8.62763	-0.01488	8.62763	-0.01988	8.62763		0.01232	7.4117	-0.02933	7.4117	-0.04635	7.4117		0.00987	11.914	-0.01223	11.914	-0.01458	11.914			0.01342	11.7724	-0.0101	11.7724	-0.00929	11.7724		0.00978	24.5471	-0.0096	24.5471	-0.00943	24.5471		0.00908	29.5158	-0.00722	29.5158	-0.00537	29.5158
	0.01589	6.62298		6.62298		6.62298		0.00991	8.61123	-0.0149	8.61123	-0.0199	8.61123		0.01236	7.42234	-0.02936	7.42234	-0.04636	7.42234		0.00987	11.9018	-0.01222	11.9018	-0.01458	11.9018			0.01345	11.7589	-0.0102	11.7589	-0.00929	11.7589		0.0098	24.5605	-0.00962	24.5605	-0.00945	24.5605		0.00908	29.5483	-0.00724	29.5483		29.5483
	0.01592	6.53946	-0.02309	6.53946	-0.03026	6.53946		0.00991	8.55217	-0.01492	8.55217	-0.01994	8.55217		0.01237	7.4235	-0.02944	7.4235	-0.04652	7.4235		0.00988	11.9157	-0.01222	11.9157	-0.01456	11.9157			0.01345	11.7448	-0.0102	11.7448	-0.0093	11.7448		0.0098	24.5318	-0.00965	24.5318	-0.0095	24.5318		0.00907	29.5905	-0.00726	29.5905	-0.00545	29.5905
	0.01592	6.60662	-0.0231	6.60662	-0.03028	6.60662		0.00992	8.56024	-0.01494	8.56024	-0.01997	8.56024		0.01237	7.39574	-0.02947	7.39574	-0.04657	7.39574		0.00988	11.8745	-0.01222	11.8745	-0.01456	11.8745			0.01346	11.7341	-0.0102	11.7341	-0.00931	11.7341		0.00982	24.5404	-0.00968	24.5404	-0.00954	24.5404		0.0091	29.5877	-0.00728	29.5877	-0.00547	29.5877
	0.01595	6.58164	-0.02312	6.58164	-0.03029	6.58164		0.00993	8.56953	-0.01497	8.56953	-0.02002	8.56953		0.01237	7.37107	-0.02953	7.37107	-0.04669	7.37107		0.00991	11.8843	-0.01232	11.8843	-0.01472	11.8843			0.01348	11.7285	-0.0102	11.7285	-0.0093	11.7285		0.00983	24.566	-0.00971	24.566	-0.00959	24.566		0.0091	29.532	-0.0073	29.532	-0.0055	29.532
	0.01595	6.58797	-0.02314	6.58797	-0.03033	6.58797		0.00995	8.59254	-0.01499	8.59254	-0.02004	8.59254		0.01241	7.39836	-0.02958	7.39836	-0.04676	7.39836		0.00991	11.8814	-0.01231	11.8814	-0.01471	11.8814			0.01349	11.7316	-0.0102	11.7316	-0.00931	11.7316		0.00984	24.5589	-0.00973	24.5589	-0.00961	24.5589		0.0091	29.52	-0.00732	29.52	-0.00553	29.52
	0.01598	6.56785	-0.02318	6.56785	-0.03038	6.56785		0.00995	8.56256	-0.01502	8.56256	-0.02009	8.56256		0.01242	7.3726	-0.02961	7.3726	-0.0468	7.3726		0.00992	11.839	-0.01231	11.839	-0.0147	11.839			0.01353	11.7225	-0.0102	11.7225	-0.0093	11.7225		0.00984	24.6011	-0.00975	24.6011	-0.00967	24.6011		0.00914	29.5827	-0.00733	29.5827	-0.00552	29.5827
	0.01597	6.58113	-0.02319	6.58113	-0.03041	6.58113		0.00997	8.59657	-0.01504	8.59657	-0.0201	8.59657		0.01241	7.37588	-0.02967	7.37588	-0.04692	7.37588		0.00993	11.8127	-0.01231	11.8127	-0.01468	11.8127			0.01351	11.7663	-0.0102	11.7663	-0.00932	11.7663		0.00986	24.574	-0.00977	24.574	-0.00969	24.574		0.00912	29.5277	-0.00732	29.5277	-0.00553	29.5277
	0.01602	6.63886	-0.02322	6.63886	-0.03042	6.63886		0.00997	8.56286	-0.01505	8.56286	-0.02013	8.56286		0.01243	7.3865	-0.02972	7.3865	-0.04701	7.3865		0.00995	11.8146	-0.0124	11.8146	-0.01486	11.8146			0.01352	11.7664	-0.0102	11.7664	-0.00932	11.7664		0.00987	24.539	-0.0098	24.539	-0.00973	24.539		0.00914	29.5605	-0.00735	29.5605	-0.00555	29.5605
	0.01603	6.60846	-0.02324	6.60846	-0.03045	6.60846		0.00999	8.54223	-0.01507	8.54223	-0.02015	8.54223		0.01244	7.32959	-0.02978	7.32959	-0.04712	7.32959		0.00995	11.8355	-0.0124	11.8355	-0.01485	11.8355			0.01356	11.7053	-0.0102	11.7053	-0.00931	11.7053		0.00987	24.5626	-0.00983	24.5626	-0.00979	24.5626		0.00914	29.5899	-0.00736	29.5899	-0.00558	29.5899
	0.01603	6.63811	-0.02327	6.63811	-0.03051	6.63811		0.00998	8.55786	-0.0151	8.55786	-0.02021	8.55786		0.01246	7.34829	-0.02983	7.34829	-0.04721	7.34829		0.00997	11.8187	-0.0124	11.8187	-0.01482	11.8187			0.01355	11.7009	-0.0102	11.7009	-0.00932	11.7009		0.00988	24.5767	-0.00986	24.5767	-0.00984	24.5767		0.00916	29.5158	-0.00738	29.5158	-0.00559	29.5158
	0.01603	6.5647	-0.02329	6.5647	-0.03055	6.5647		0.01001	8.54943	-0.01512	8.54943	-0.02022	8.54943		0.01247	7.32715	-0.02989	7.32715	-0.04731	7.32715		0.00997	11.7883	-0.01239	11.7883	-0.01482	11.7883			0.01357	11.6979	-0.0102	11.6979	-0.00932	11.6979		0.00989	24.5213	-0.00988	24.5213	-0.00986	24.5213		0.00917	29.507	-0.00739	29.507	-0.00561	29.507
	0.01606	6.55083	-0.02331	6.55083	-0.03056	6.55083		0.01002	8.56691	-0.01514	8.56691	-0.02026	8.56691		0.01248	7.31235	-0.02992	7.31235	-0.04735	7.31235		0.00999	11.7611	-0.01249	11.7611	-0.01499	11.7611			0.0136	11.7043	-0.0102	11.7043	-0.00931	11.7043		0.00991	24.5006	-0.00991	24.5006	-0.0099	24.5006		0.00917	29.575	-0.00741	29.575	-0.00565	29.575
	0.01608	6.56219	-0.02334	6.56219	-0.0306	6.56219		0.01002	8.51494	-0.01516	8.51494	-0.0203	8.51494		0.01249	7.31338	-0.02994	7.31338	-0.0474	7.31338		0.01	11.7587	-0.01249	11.7587	-0.01498	11.7587			0.01359	11.6987	-0.0102	11.6987	-0.00933	11.6987		0.00991	24.5057	-0.00992	24.5057	-0.00994	24.5057		0.00918	29.5477	-0.00742	29.5477	-0.00567	29.5477
	0.0161	6.5483	-0.02337	6.5483	-0.03064	6.5483		0.01002	8.45615	-0.01518	8.45615	-0.02034	8.45615		0.01249	7.25936	-0.03003	7.25936	-0.04757	7.25936		0.01	11.7807	-0.01249	11.7807	-0.01497	11.7807			0.01362	11.676	-0.0102	11.676	-0.00932	11.676		0.00992	24.5311	-0.00995	24.5311	-0.00999	24.5311		0.00918	29.534	-0.00744	29.534	-0.0057	29.534
	0.01611	6.52775	-0.02339	6.52775	-0.03067	6.52775		0.01004	8.41233	-0.0152	8.41233	-0.02036	8.41233		0.01253	7.27551	-0.03006	7.27551	-0.04758	7.27551		0.00999	11.7259	-0.01248	11.7259	-0.01497	11.7259			0.01363	11.6621	-0.0102	11.6621	-0.00932	11.6621		0.00993	24.5383	-0.00997	24.5383	-0.01	24.5383		0.0092	29.554	-0.00746	29.554	-0.00572	29.554
	0.01613	6.56295	-0.02341	6.56295	-0.03069	6.56295		0.01005	8.47769	-0.01522	8.47769	-0.02039	8.47769		0.01253	7.31771	-0.03011	7.31771	-0.04769	7.31771		0.01	11.7639	-0.01258	11.7639	-0.01516	11.7639			0.01366	11.6474	-0.0102	11.6474	-0.00932	11.6474		0.00994	24.4919	-0.01	24.4919	-0.0101	24.4919		0.00922	29.5224	-0.00748	29.5224	-0.00573	29.5224
	0.01611	6.55683	-0.02344	6.55683	-0.03077	6.55683		0.01006	8.4433	-0.01524	8.4433	-0.02043	8.4433		0.01257	7.28205	-0.03017	7.28205	-0.04776	7.28205		0.01	11.7838	-0.01258	11.7838	-0.01515	11.7838			0.01367	11.6996	-0.0102	11.6996	-0.00932	11.6996		0.00995	24.5158	-0.01	24.5158	-0.0101	24.5158		0.00921	29.4975	-0.00749	29.4975	-0.00577	29.4975
	0.01613	6.53083	-0.02346	6.53083	-0.03079	6.53083		0.01007	8.48826	-0.01527	8.48826	-0.02046	8.48826		0.01254	7.23175	-0.03025	7.23175	-0.04796	7.23175		0.01	11.7891	-0.01257	11.7891	-0.01515	11.7891			0.01368	11.6997	-0.0102	11.6997	-0.00932	11.6997		0.00996	24.5198	-0.01	24.5198	-0.0101	24.5198		0.00921	29.5001	-0.00751	29.5001	-0.00581	29.5001
	0.01616	6.55739	-0.02348	6.55739	-0.0308	6.55739		0.01008	8.52935	-0.01529	8.52935	-0.02049	8.52935		0.01257	7.25043	-0.03031	7.25043	-0.04804	7.25043		0.0101	11.7718	-0.01257	11.7718	-0.01504	11.7718			0.01366	11.6391	-0.0102	11.6391	-0.00934	11.6391		0.00996	24.4913	-0.0101	24.4913	-0.0102	24.4913		0.00923	29.5753	-0.00752	29.5753	-0.00582	29.5753
	0.01618	6.55492	-0.02351	6.55492	-0.03084	6.55492		0.01007	8.44771	-0.01531	8.44771	-0.02054	8.44771		0.01258	7.25535	-0.03036	7.25535	-0.04814	7.25535		0.0101	11.7205	-0.01257	11.7205	-0.01503	11.7205			0.0137	11.6391	-0.0103	11.6391	-0.00934	11.6391		0.00998	24.5323	-0.0101	24.5323	-0.0102	24.5323		0.00923	29.5235	-0.00754	29.5235	-0.00585	29.5235
	0.01619	6.53531	-0.02353	6.53531	-0.03087	6.53531		0.01008	8.51819	-0.01532	8.51819	-0.02056	8.51819		0.01259	7.30133	-0.03042	7.30133	-0.04824	7.30133		0.0101	11.7397	-0.01266	11.7397	-0.01523	11.7397			0.01371	11.6349	-0.0103	11.6349	-0.00934	11.6349		0.01	24.5335	-0.0101	24.5335	-0.0102	24.5335		0.00923	29.5031	-0.00755	29.5031	-0.00588	29.5031
	0.01621	6.53565	-0.02356	6.53565	-0.03091	6.53565		0.0101	8.43322	-0.01534	8.43322	-0.02058	8.43322		0.01261	7.26469	-0.03044	7.26469	-0.04828	7.26469		0.0101	11.6988	-0.01266	11.6988	-0.01522	11.6988			0.01373	11.67	-0.0103	11.67	-0.00934	11.67		0.01001	24.5468	-0.0102	24.5468	-0.0103	24.5468		0.00925	29.538	-0.00757	29.538	-0.00589	29.538
	0.01624	6.52491	-0.02359	6.52491	-0.03094	6.52491		0.01011	8.41116	-0.01537	8.41116	-0.02062	8.41116		0.01262	7.27861	-0.0305	7.27861	-0.04838	7.27861		0.0101	11.689	-0.01266	11.689	-0.01522	11.689			0.01374	11.6383	-0.0103	11.6383	-0.00935	11.6383		0.01002	24.5924	-0.0102	24.5924	-0.0103	24.5924		0.00925	29.5391	-0.0076	29.5391	-0.00595	29.5391
	0.01627	6.53245	-0.02361	6.53245	-0.03095	6.53245		0.01012	8.43783	-0.01539	8.43783	-0.02066	8.43783		0.01263	7.19773	-0.03056	7.19773	-0.04848	7.19773		0.0101	11.6809	-0.01266	11.6809	-0.01521	11.6809			0.01377	11.6409	-0.0103	11.6409	-0.00934	11.6409		0.01002	24.543	-0.0102	24.543	-0.0104	24.543		0.00926	29.515	-0.00762	29.515	-0.00597	29.515
	0.01627	6.55427	-0.02363	6.55427	-0.03099	6.55427		0.01013	8.43803	-0.01541	8.43803	-0.02069	8.43803		0.01263	7.25344	-0.03061	7.25344	-0.04859	7.25344		0.0101	11.684	-0.01275	11.684	-0.0154	11.684			0.01377	11.656	-0.0103	11.656	-0.00935	11.656		0.01002	24.5947	-0.0102	24.5947	-0.0104	24.5947		0.00927	29.5694	-0.00764	29.5694	-0.00601	29.5694
	0.01627	6.52986	-0.02366	6.52986	-0.03105	6.52986		0.01015	8.4187	-0.01543	8.4187	-0.02071	8.4187		0.01266	7.25307	-0.03067	7.25307	-0.04867	7.25307		0.0101	11.6601	-0.01275	11.6601	-0.0154	11.6601			0.01377	11.641	-0.0103	11.641	-0.00935	11.641		0.01004	24.554	-0.0102	24.554	-0.0105	24.554		0.00929	29.588	-0.00765	29.588	-0.00602	29.588
	0.0163	6.52942	-0.02369	6.52942	-0.03108	6.52942		0.01017	8.44426	-0.01545	8.44426	-0.02073	8.44426		0.01266	7.2688	-0.03069	7.2688	-0.04873	7.2688		0.0101	11.6096	-0.01275	11.6096	-0.01539	11.6096			0.01378	11.7196	-0.0103	11.7196	-0.00935	11.7196		0.01004	24.5186	-0.0103	24.5186	-0.0105	24.5186		0.00928	29.6051	-0.00768	29.6051	-0.00607	29.6051
	0.01632	6.47626	-0.02371	6.47626	-0.0311	6.47626		0.01017	8.40928	-0.01547	8.40928	-0.02077	8.40928		0.01268	7.16672	-0.03075	7.16672	-0.04882	7.16672		0.0101	11.6224	-0.01274	11.6224	-0.01539	11.6224			0.01379	11.6678	-0.0103	11.6678	-0.00935	11.6678		0.01005	24.5476	-0.0103	24.5476	-0.0105	24.5476		0.00929	29.5842	-0.0077	29.5842	-0.00611	29.5842
	0.01632	6.50492	-0.02374	6.50492	-0.03116	6.50492		0.01017	8.40597	-0.01549	8.40597	-0.02081	8.40597		0.01268	7.26444	-0.03078	7.26444	-0.04888	7.26444		0.0102	11.6611	-0.01284	11.6611	-0.01548	11.6611			0.01381	11.6861	-0.0103	11.6861	-0.00936	11.6861		0.01009	24.5443	-0.0103	24.5443	-0.0106	24.5443		0.0093	29.6079	-0.00772	29.6079	-0.00615	29.6079
	0.01632	6.50074	-0.02376	6.50074	-0.0312	6.50074		0.01019	8.39969	-0.01551	8.39969	-0.02083	8.39969		0.01269	7.24289	-0.03083	7.24289	-0.04898	7.24289		0.0102	11.6468	-0.01284	11.6468	-0.01547	11.6468			0.01385	11.68	-0.0103	11.68	-0.00935	11.68		0.01007	24.5362	-0.0103	24.5362	-0.0106	24.5362		0.00931	29.5721	-0.00774	29.5721	-0.00617	29.5721
	0.01635	6.50988	-0.02379	6.50988	-0.03123	6.50988		0.0102	8.35753	-0.01553	8.35753	-0.02086	8.35753		0.01271	7.23667	-0.03089	7.23667	-0.04907	7.23667		0.0102	11.6288	-0.01283	11.6288	-0.01547	11.6288			0.01385	11.6844	-0.0103	11.6844	-0.00936	11.6844		0.01008	24.499	-0.0104	24.499	-0.0107	24.499		0.00931	29.5872	-0.00776	29.5872	-0.00621	29.5872
	0.01638	6.49454	-0.02381	6.49454	-0.03124	6.49454		0.0102	8.35989	-0.01555	8.35989	-0.0209	8.35989		0.01272	7.2001	-0.03094	7.2001	-0.04917	7.2001		0.0102	11.6115	-0.01283	11.6115	-0.01546	11.6115			0.01385	11.675	-0.0103	11.675	-0.00937	11.675		0.01009	24.5462	-0.0104	24.5462	-0.0107	24.5462		0.00931	29.5358	-0.00778	29.5358	-0.00624	29.5358
	0.01638	6.47969	-0.02383	6.47969	-0.03128	6.47969		0.0102	8.40899	-0.01557	8.40899	-0.02094	8.40899		0.01273	7.21009	-0.031	7.21009	-0.04927	7.21009		0.0102	11.6597	-0.01283	11.6597	-0.01546	11.6597			0.01388	11.7103	-0.0103	11.7103	-0.00936	11.7103		0.0101	24.5187	-0.0104	24.5187	-0.0107	24.5187		0.00934	29.5251	-0.00779	29.5251	-0.00624	29.5251
	0.01638	6.46165	-0.02385	6.46165	-0.03132	6.46165		0.01022	8.39449	-0.01559	8.39449	-0.02096	8.39449		0.01274	7.22033	-0.03106	7.22033	-0.04937	7.22033		0.0102	11.626	-0.01293	11.626	-0.01565	11.626			0.0139	11.7012	-0.0103	11.7012	-0.00936	11.7012		0.01012	24.4805	-0.0104	24.4805	-0.0108	24.4805		0.00934	29.5512	-0.00782	29.5512	-0.00629	29.5512
	0.0164	6.48965	-0.02387	6.48965	-0.03134	6.48965		0.01024	8.44591	-0.01561	8.44591	-0.02098	8.44591		0.01276	7.23575	-0.03111	7.23575	-0.04946	7.23575		0.0102	11.6205	-0.01292	11.6205	-0.01564	11.6205			0.01389	11.6745	-0.0103	11.6745	-0.00938	11.6745		0.01014	24.5216	-0.0105	24.5216	-0.0108	24.5216		0.00934	29.5426	-0.00783	29.5426	-0.00632	29.5426
	0.01643	6.48368	-0.0239	6.48368	-0.03137	6.48368		0.01024	8.39177	-0.01563	8.39177	-0.02102	8.39177		0.01276	7.26026	-0.03117	7.26026	-0.04957	7.26026		0.0102	11.6435	-0.01292	11.6435	-0.01564	11.6435			0.01392	11.6276	-0.0103	11.6276	-0.00938	11.6276		0.01013	24.4641	-0.0105	24.4641	-0.0109	24.4641		0.00937	29.5194	-0.00785	29.5194	-0.00632	29.5194
	0.01645	6.51528	-0.02392	6.51528	-0.03139	6.51528		0.01024	8.3495	-0.01565	8.3495	-0.02106	8.3495		0.01278	7.26225	-0.03122	7.26225	-0.04966	7.26225		0.0102	11.5993	-0.01292	11.5993	-0.01563	11.5993			0.01392	11.6911	-0.0103	11.6911	-0.00939	11.6911		0.01016	24.4561	-0.0105	24.4561	-0.0109	24.4561		0.00936	29.5127	-0.00787	29.5127	-0.00638	29.5127
	0.01646	6.50115	-0.02393	6.50115	-0.0314	6.50115		0.01025	8.34696	-0.01567	8.34696	-0.02109	8.34696		0.01281	7.18115	-0.03125	7.18115	-0.04969	7.18115		0.0102	11.5889	-0.01291	11.5889	-0.01563	11.5889			0.01393	11.6822	-0.0104	11.6822	-0.00939	11.6822		0.01016	24.4586	-0.0106	24.4586	-0.011	24.4586		0.00937	29.5407	-0.00788	29.5407	-0.0064	29.5407
	0.01646	6.50198	-0.02396	6.50198	-0.03146	6.50198		0.01027	8.37857	-0.01569	8.37857	-0.02112	8.37857		0.01282	7.19733	-0.03133	7.19733	-0.04985	7.19733		0.0102	11.575	-0.01301	11.575	-0.01582	11.575			0.01392	11.6578	-0.0104	11.6578	-0.0094	11.6578		0.01017	24.4859	-0.0106	24.4859	-0.011	24.4859		0.00938	29.493	-0.0079	29.493	-0.00642	29.493
	0.01648	6.47206	-0.02398	6.47206	-0.03148	6.47206		0.01028	8.33557	-0.01572	8.33557	-0.02116	8.33557		0.01282	7.21479	-0.03136	7.21479	-0.0499	7.21479		0.0103	11.5833	-0.01301	11.5833	-0.01571	11.5833			0.01399	11.6857	-0.0104	11.6857	-0.00938	11.6857		0.01018	24.4592	-0.0106	24.4592	-0.0111	24.4592		0.00939	29.4768	-0.00793	29.4768	-0.00647	29.4768
	0.0165	6.48228	-0.02401	6.48228	-0.03152	6.48228		0.01029	8.32971	-0.01574	8.32971	-0.02119	8.32971		0.01284	7.20861	-0.03142	7.20861	-0.04999	7.20861		0.0103	11.5385	-0.013	11.5385	-0.01571	11.5385			0.01396	11.6955	-0.0104	11.6955	-0.0094	11.6955		0.01019	24.4392	-0.0107	24.4392	-0.0111	24.4392		0.0094	29.4382	-0.00795	29.4382	-0.00649	29.4382
	0.01651	6.44321	-0.02403	6.44321	-0.03155	6.44321		0.01029	8.32296	-0.01576	8.32296	-0.02123	8.32296		0.01284	7.22955	-0.03147	7.22955	-0.0501	7.22955		0.0103	11.5469	-0.013	11.5469	-0.0157	11.5469			0.014	11.7263	-0.0104	11.7263	-0.00939	11.7263		0.01019	24.4206	-0.0107	24.4206	-0.0112	24.4206		0.00941	29.4544	-0.00797	29.4544	-0.00653	29.4544
	0.01653	6.44189	-0.02405	6.44189	-0.03157	6.44189		0.0103	8.35576	-0.01578	8.35576	-0.02126	8.35576		0.01285	7.22351	-0.0315	7.22351	-0.05015	7.22351		0.0103	11.5063	-0.013	11.5063	-0.0157	11.5063			0.014	11.671	-0.0104	11.671	-0.00939	11.671		0.0102	24.4041	-0.0107	24.4041	-0.0112	24.4041		0.00941	29.4375	-0.00798	29.4375	-0.00656	29.4375
	0.01653	6.45994	-0.02407	6.45994	-0.03161	6.45994		0.01031	8.28484	-0.0158	8.28484	-0.02129	8.28484		0.01285	7.25363	-0.03158	7.25363	-0.05032	7.25363		0.0103	11.5102	-0.013	11.5102	-0.01569	11.5102			0.01401	11.6715	-0.0104	11.6715	-0.0094	11.6715		0.01021	24.3305	-0.0107	24.3305	-0.0113	24.3305		0.00942	29.4204	-0.00801	29.4204	-0.0066	29.4204
	0.01658	6.42888	-0.02409	6.42888	-0.0316	6.42888		0.01032	8.3537	-0.01582	8.3537	-0.02132	8.3537		0.01287	7.23861	-0.03161	7.23861	-0.05035	7.23861		0.0103	11.4964	-0.01309	11.4964	-0.01588	11.4964			0.014	11.6962	-0.0104	11.6962	-0.00941	11.6962		0.01023	24.3785	-0.0108	24.3785	-0.0113	24.3785		0.00943	29.4086	-0.00803	29.4086	-0.00663	29.4086
	0.01656	6.4042	-0.02411	6.4042	-0.03166	6.4042		0.01033	8.31974	-0.01584	8.31974	-0.02135	8.31974		0.01289	7.27945	-0.03169	7.27945	-0.0505	7.27945		0.0103	11.4953	-0.01309	11.4953	-0.01588	11.4953			0.01405	11.7095	-0.0104	11.7095	-0.00939	11.7095		0.01023	24.3214	-0.0108	24.3214	-0.0114	24.3214		0.00944	29.3734	-0.00805	29.3734	-0.00665	29.3734
	0.01659	6.42759	-0.02413	6.42759	-0.03167	6.42759		0.01033	8.33614	-0.01586	8.33614	-0.02139	8.33614		0.01292	7.19829	-0.03175	7.19829	-0.05058	7.19829		0.0103	11.5517	-0.01309	11.5517	-0.01587	11.5517			0.01404	11.7613	-0.0104	11.7613	-0.00941	11.7613		0.01025	24.33	-0.0108	24.33	-0.0114	24.33		0.00944	29.4076	-0.00807	29.4076	-0.0067	29.4076
	0.01661	6.4306	-0.02416	6.4306	-0.03171	6.4306		0.01036	8.355	-0.01588	8.355	-0.02141	8.355		0.01293	7.21644	-0.03181	7.21644	-0.05068	7.21644		0.0103	11.4722	-0.01308	11.4722	-0.01587	11.4722			0.01405	11.7128	-0.0104	11.7128	-0.00941	11.7128		0.01025	24.3296	-0.0109	24.3296	-0.0115	24.3296		0.00944	29.3583	-0.00809	29.3583	-0.00674	29.3583
	0.01662	6.45114	-0.02418	6.45114	-0.03174	6.45114		0.01035	8.37	-0.0159	8.37	-0.02146	8.37		0.01292	7.25242	-0.03183	7.25242	-0.05075	7.25242		0.0103	11.4748	-0.01308	11.4748	-0.01586	11.4748			0.01408	11.6534	-0.0104	11.6534	-0.00941	11.6534		0.01026	24.3182	-0.0109	24.3182	-0.0115	24.3182		0.00947	29.3458	-0.00812	29.3458	-0.00676	29.3458
	0.01664	6.43161	-0.02421	6.43161	-0.03178	6.43161		0.01037	8.30015	-0.01593	8.30015	-0.02149	8.30015		0.01294	7.20114	-0.03192	7.20114	-0.05089	7.20114		0.0104	11.4555	-0.01318	11.4555	-0.01595	11.4555			0.01408	11.6599	-0.0104	11.6599	-0.00942	11.6599		0.01026	24.2881	-0.0109	24.2881	-0.0116	24.2881		0.00946	29.3409	-0.00813	29.3409	-0.0068	29.3409
	0.01662	6.41594	-0.02423	6.41594	-0.03184	6.41594		0.01038	8.25312	-0.01594	8.25312	-0.02151	8.25312		0.01297	7.19486	-0.03194	7.19486	-0.05092	7.19486		0.0104	11.4184	-0.01317	11.4184	-0.01595	11.4184			0.01412	11.6718	-0.0104	11.6718	-0.00941	11.6718		0.01028	24.2691	-0.011	24.2691	-0.0116	24.2691		0.00946	29.2843	-0.00815	29.2843	-0.00685	29.2843
	0.01667	6.40572	-0.02425	6.40572	-0.03183	6.40572		0.01039	8.33798	-0.01597	8.33798	-0.02155	8.33798		0.01297	7.20646	-0.03197	7.20646	-0.05097	7.20646		0.0104	11.4098	-0.01317	11.4098	-0.01594	11.4098			0.01412	11.6691	-0.0104	11.6691	-0.00942	11.6691		0.01027	24.2706	-0.011	24.2706	-0.0117	24.2706		0.00946	29.2537	-0.00818	29.2537	-0.00689	29.2537
	0.01667	6.40151	-0.02427	6.40151	-0.03187	6.40151		0.0104	8.40927	-0.01599	8.40927	-0.02158	8.40927		0.01298	7.23647	-0.03203	7.23647	-0.05108	7.23647		0.0104	11.4443	-0.01317	11.4443	-0.01594	11.4443			0.01414	11.7134	-0.0104	11.7134	-0.00942	11.7134		0.0103	24.2381	-0.011	24.2381	-0.0117	24.2381		0.00949	29.3047	-0.00819	29.3047	-0.00689	29.3047
	0.0167	6.38697	-0.02429	6.38697	-0.03188	6.38697		0.01039	8.3075	-0.01601	8.3075	-0.02163	8.3075		0.01299	7.25043	-0.03208	7.25043	-0.05118	7.25043		0.0104	11.4003	-0.01317	11.4003	-0.01593	11.4003			0.01415	11.7032	-0.0104	11.7032	-0.00942	11.7032		0.01031	24.2232	-0.011	24.2232	-0.0118	24.2232		0.00949	29.3329	-0.00821	29.3329	-0.00693	29.3329
	0.01672	6.39751	-0.02432	6.39751	-0.03192	6.39751		0.01042	8.30571	-0.01604	8.30571	-0.02165	8.30571		0.01302	7.1799	-0.03214	7.1799	-0.05126	7.1799		0.0104	11.3878	-0.01326	11.3878	-0.01612	11.3878			0.01414	11.6932	-0.0104	11.6932	-0.00943	11.6932		0.01031	24.1927	-0.0111	24.1927	-0.0118	24.1927		0.00949	29.355	-0.00824	29.355	-0.00699	29.355
	0.01672	6.42947	-0.02434	6.42947	-0.03196	6.42947		0.01042	8.23227	-0.01605	8.23227	-0.02168	8.23227		0.013	7.24248	-0.03219	7.24248	-0.05139	7.24248		0.0104	11.3813	-0.01326	11.3813	-0.01612	11.3813			0.01416	11.733	-0.0105	11.733	-0.00943	11.733		0.01033	24.2324	-0.0111	24.2324	-0.0119	24.2324		0.00951	29.3009	-0.00826	29.3009	-0.00701	29.3009
	0.01674	6.42218	-0.02436	6.42218	-0.03198	6.42218		0.01044	8.27257	-0.01607	8.27257	-0.0217	8.27257		0.01302	7.19346	-0.03225	7.19346	-0.05148	7.19346		0.0104	11.379	-0.01326	11.379	-0.01611	11.379			0.01418	11.7498	-0.0105	11.7498	-0.00944	11.7498		0.01033	24.1938	-0.0111	24.1938	-0.0119	24.1938		0.00951	29.2927	-0.00828	29.2927	-0.00706	29.2927
	0.01675	6.40359	-0.02438	6.40359	-0.03201	6.40359		0.01045	8.30977	-0.0161	8.30977	-0.02175	8.30977		0.01304	7.19869	-0.03228	7.19869	-0.05152	7.19869		0.0104	11.3419	-0.01325	11.3419	-0.01611	11.3419			0.01421	11.7204	-0.0105	11.7204	-0.00944	11.7204		0.01034	24.2002	-0.0112	24.2002	-0.012	24.2002		0.00952	29.3242	-0.0083	29.3242	-0.00708	29.3242
	0.01678	6.37846	-0.0244	6.37846	-0.03202	6.37846		0.01045	8.278	-0.01612	8.278	-0.02179	8.278		0.01305	7.15963	-0.03233	7.15963	-0.05162	7.15963		0.0104	11.3486	-0.01325	11.3486	-0.0161	11.3486			0.01423	11.7479	-0.0105	11.7479	-0.00943	11.7479		0.01036	24.1799	-0.0112	24.1799	-0.012	24.1799		0.00952	29.2984	-0.00832	29.2984	-0.00711	29.2984
	0.0168	6.41718	-0.02443	6.41718	-0.03206	6.41718		0.01046	8.21806	-0.01615	8.21806	-0.02184	8.21806		0.01307	7.15069	-0.03239	7.15069	-0.05171	7.15069		0.0104	11.3461	-0.01335	11.3461	-0.01629	11.3461			0.01421	11.7057	-0.0105	11.7057	-0.00945	11.7057		0.01037	24.2388	-0.0112	24.2388	-0.012	24.2388		0.00953	29.2665	-0.00835	29.2665	-0.00716	29.2665
	0.01683	6.38651	-0.02444	6.38651	-0.03205	6.38651		0.01047	8.28384	-0.01617	8.28384	-0.02187	8.28384		0.01308	7.19935	-0.03244	7.19935	-0.05181	7.19935		0.0105	11.3413	-0.01334	11.3413	-0.01619	11.3413			0.01423	11.6968	-0.0105	11.6968	-0.00945	11.6968		0.01038	24.2313	-0.0112	24.2313	-0.0121	24.2313		0.00955	29.2463	-0.00837	29.2463	-0.00719	29.2463
	0.01682	6.37564	-0.02446	6.37564	-0.0321	6.37564		0.01049	8.31446	-0.01619	8.31446	-0.02189	8.31446		0.01308	7.28566	-0.03244	7.28566	-0.05181	7.28566		0.0105	11.3392	-0.01334	11.3392	-0.01618	11.3392			0.01426	11.7224	-0.0105	11.7224	-0.00945	11.7224		0.01038	24.2253	-0.0113	24.2253	-0.0121	24.2253		0.00955	29.2671	-0.00838	29.2671	-0.00722	29.2671
	0.01683	6.3735	-0.02449	6.3735	-0.03215	6.3735		0.0105	8.25234	-0.01621	8.25234	-0.02192	8.25234		0.0131	7.24365	-0.03253	7.24365	-0.05196	7.24365		0.0105	11.3411	-0.01334	11.3411	-0.01618	11.3411			0.01426	11.699	-0.0105	11.699	-0.00946	11.699		0.01038	24.2114	-0.0113	24.2114	-0.0122	24.2114		0.00955	29.2563	-0.0084	29.2563	-0.00725	29.2563
	0.01686	6.37272	-0.02451	6.37272	-0.03216	6.37272		0.01052	8.19078	-0.01623	8.19078	-0.02195	8.19078		0.01312	7.247	-0.03256	7.247	-0.05199	7.247		0.0105	11.3216	-0.01334	11.3216	-0.01617	11.3216			0.01429	11.7389	-0.0105	11.7389	-0.00945	11.7389		0.0104	24.2025	-0.0113	24.2025	-0.0122	24.2025		0.00958	29.2786	-0.00842	29.2786	-0.00727	29.2786
	0.01691	6.34234	-0.02453	6.34234	-0.03215	6.34234		0.01051	8.25511	-0.01626	8.25511	-0.022	8.25511		0.01313	7.27748	-0.03261	7.27748	-0.05209	7.27748		0.0105	11.3045	-0.01333	11.3045	-0.01616	11.3045			0.01426	11.7199	-0.0105	11.7199	-0.00948	11.7199		0.01041	24.2083	-0.0113	24.2083	-0.0123	24.2083		0.00958	29.266	-0.00844	29.266	-0.0073	29.266
	0.01688	6.35853	-0.02455	6.35853	-0.03222	6.35853		0.01052	8.18085	-0.01628	8.18085	-0.02203	8.18085		0.01315	7.22808	-0.03267	7.22808	-0.05218	7.22808		0.0105	11.333	-0.01343	11.333	-0.01636	11.333			0.01433	11.7161	-0.0105	11.7161	-0.00946	11.7161		0.01041	24.1787	-0.0114	24.1787	-0.0123	24.1787		0.00959	29.2602	-0.00846	29.2602	-0.00733	29.2602
	0.0169	6.36594	-0.02457	6.36594	-0.03224	6.36594		0.01054	8.18757	-0.01631	8.18757	-0.02207	8.18757		0.01315	7.23072	-0.03272	7.23072	-0.05229	7.23072		0.0105	11.2955	-0.01343	11.2955	-0.01635	11.2955			0.01433	11.6975	-0.0105	11.6975	-0.00947	11.6975		0.01043	24.1637	-0.0114	24.1637	-0.0124	24.1637		0.00959	29.2294	-0.00848	29.2294	-0.00738	29.2294
	0.01693	6.35985	-0.0246	6.35985	-0.03227	6.35985		0.01057	8.12938	-0.01633	8.12938	-0.02208	8.12938		0.01317	7.16795	-0.03278	7.16795	-0.05239	7.16795		0.0105	11.3307	-0.01342	11.3307	-0.01635	11.3307			0.01432	11.6623	-0.0105	11.6623	-0.00949	11.6623		0.01044	24.1915	-0.0114	24.1915	-0.0124	24.1915		0.0096	29.193	-0.0085	29.193	-0.0074	29.193
	0.01694	6.38739	-0.02461	6.38739	-0.03228	6.38739		0.01055	8.22335	-0.01634	8.22335	-0.02213	8.22335		0.01317	7.23371	-0.03283	7.23371	-0.0525	7.23371		0.0105	11.3329	-0.01342	11.3329	-0.01634	11.3329			0.01434	11.725	-0.0105	11.725	-0.00948	11.725		0.01045	24.2004	-0.0114	24.2004	-0.0124	24.2004		0.00961	29.2396	-0.00852	29.2396	-0.00742	29.2396
	0.01694	6.32848	-0.02463	6.32848	-0.03232	6.32848		0.01056	8.24939	-0.01636	8.24939	-0.02216	8.24939		0.01318	7.16479	-0.03289	7.16479	-0.0526	7.16479		0.0105	11.2695	-0.01342	11.2695	-0.01633	11.2695			0.01437	11.7381	-0.0105	11.7381	-0.00948	11.7381		0.01046	24.1781	-0.0115	24.1781	-0.0125	24.1781		0.00962	29.2853	-0.00853	29.2853	-0.00744	29.2853
	0.01696	6.35323	-0.02466	6.35323	-0.03236	6.35323		0.01058	8.14907	-0.01638	8.14907	-0.02219	8.14907		0.01319	7.22337	-0.03292	7.22337	-0.05264	7.22337		0.0106	11.295	-0.01341	11.295	-0.01623	11.295			0.01438	11.7372	-0.0106	11.7372	-0.00949	11.7372		0.01047	24.1756	-0.0115	24.1756	-0.0125	24.1756		0.00962	29.2012	-0.00855	29.2012	-0.00749	29.2012
	0.01699	6.35864	-0.02468	6.35864	-0.03237	6.35864		0.01059	8.18158	-0.0164	8.18158	-0.02222	8.18158		0.01321	7.23325	-0.033	7.23325	-0.05279	7.23325		0.0106	11.258	-0.01351	11.258	-0.01642	11.258			0.01436	11.6829	-0.0106	11.6829	-0.00951	11.6829		0.01048	24.1877	-0.0115	24.1877	-0.0126	24.1877		0.00964	29.2003	-0.00858	29.2003	-0.00751	29.2003
	0.01698	6.30813	-0.0247	6.30813	-0.03242	6.30813		0.01059	8.18013	-0.01641	8.18013	-0.02224	8.18013		0.01323	7.24305	-0.03303	7.24305	-0.05283	7.24305		0.0106	11.2728	-0.01351	11.2728	-0.01642	11.2728			0.0144	11.7727	-0.0106	11.7727	-0.00951	11.7727		0.01049	24.1925	-0.0116	24.1925	-0.0126	24.1925		0.00963	29.1847	-0.0086	29.1847	-0.00757	29.1847
	0.01704	6.34474	-0.02471	6.34474	-0.03238	6.34474		0.0106	8.13633	-0.01644	8.13633	-0.02228	8.13633		0.01323	7.25642	-0.03308	7.25642	-0.05294	7.25642		0.0106	11.2674	-0.01351	11.2674	-0.01641	11.2674			0.0144	11.7489	-0.0106	11.7489	-0.00952	11.7489		0.01049	24.2037	-0.0116	24.2037	-0.0127	24.2037		0.00964	29.2238	-0.00862	29.2238	-0.00759	29.2238
	0.01702	6.32416	-0.02474	6.32416	-0.03246	6.32416		0.01062	8.16059	-0.01646	8.16059	-0.02231	8.16059		0.01323	7.2477	-0.03314	7.2477	-0.05305	7.2477		0.0106	11.2843	-0.0135	11.2843	-0.0164	11.2843			0.01441	11.7731	-0.0106	11.7731	-0.00952	11.7731		0.01051	24.1848	-0.0116	24.1848	-0.0127	24.1848		0.00965	29.1457	-0.00863	29.1457	-0.00761	29.1457
	0.01706	6.32397	-0.02475	6.32397	-0.03244	6.32397		0.01061	8.15632	-0.01648	8.15632	-0.02236	8.15632		0.01326	7.19926	-0.03319	7.19926	-0.05313	7.19926		0.0106	11.2559	-0.0135	11.2559	-0.0164	11.2559			0.01441	11.8207	-0.0106	11.8207	-0.00954	11.8207		0.01052	24.2219	-0.0116	24.2219	-0.0128	24.2219		0.00967	29.206	-0.00865	29.206	-0.00764	29.206
	0.01706	6.31683	-0.02477	6.31683	-0.03248	6.31683		0.01065	8.18618	-0.0165	8.18618	-0.02235	8.18618		0.01328	7.18134	-0.03325	7.18134	-0.05322	7.18134		0.0106	11.242	-0.0136	11.242	-0.01659	11.242			0.01445	11.7762	-0.0106	11.7762	-0.00953	11.7762		0.01053	24.1877	-0.0117	24.1877	-0.0128	24.1877		0.00966	29.2202	-0.00867	29.2202	-0.00768	29.2202
	0.01709	6.31396	-0.02479	6.31396	-0.03249	6.31396		0.01064	8.12298	-0.01653	8.12298	-0.02241	8.12298		0.01328	7.19963	-0.03328	7.19963	-0.05328	7.19963		0.0106	11.2244	-0.01359	11.2244	-0.01659	11.2244			0.01444	11.7775	-0.0106	11.7775	-0.00954	11.7775		0.01053	24.1731	-0.0117	24.1731	-0.0129	24.1731		0.00968	29.2394	-0.00868	29.2394	-0.00769	29.2394
	0.01709	6.31263	-0.02482	6.31263	-0.03255	6.31263		0.01066	8.12479	-0.01654	8.12479	-0.02242	8.12479		0.01328	7.17148	-0.03333	7.17148	-0.05339	7.17148		0.0106	11.2236	-0.01359	11.2236	-0.01658	11.2236			0.01449	11.7757	-0.0106	11.7757	-0.00953	11.7757		0.01054	24.1875	-0.0117	24.1875	-0.0129	24.1875		0.00967	29.2111	-0.00871	29.2111	-0.00775	29.2111
[truncated: 4,262 more rows]
